# Supplementary material
Source: PubMed Central journal article supplement (PMC3857329)

# Supporting Information

Electrophilic C–H Borylation and Related Reactions of B–H Boron Cations

Aleksandrs Prokofjevs, Janis Jermaks, Alina Borovika, Jeff W. Kampf, and Edwin Vedejs\*

## Table of Contents

|                                                                                                                          |    |
|--------------------------------------------------------------------------------------------------------------------------|----|
| Preparation and X-Ray Crystallography Details of <b>6</b> ([HCB <sub>11</sub> Cl <sub>11</sub> ] <sup>-</sup> Salt)..... | S3 |
| X-Ray Crystallography Details of <b>20</b> .....                                                                         | S4 |
| X-Ray Crystallography Details of <b>30</b> .....                                                                         | S5 |
| NMR Spectra.....                                                                                                         | S7 |

## Preparation and X-Ray Crystallography Details of **6** ( $[\text{HCB}_{11}\text{Cl}_{11}]^-$ Salt)

This procedure describes preparation of crystalline  $[\textit{closo}\text{-HCB}_{11}\text{Cl}_{11}]^-$  salt of borenium **6** for the X-ray crystallographic study. Every possible effort was made to protect the reaction mixture from exposure to air and moisture. The reaction was performed under  $\text{N}_2$  atmosphere in a glovebox. Disposable glassware flame-dried at the glass softening temperature was used. Toluene was distilled from  $\text{CaH}_2$ , and subsequently dried with freshly activated molecular sieves in the glovebox. Hexanes were dried by passing through a column of activated alumina, followed by storing over freshly activated molecular sieves in the glovebox. In a dry 4 mL scintillation vial a mixture of solid  $\text{Ph}_3\text{C}[\textit{closo}\text{-HCB}_{11}\text{Cl}_{11}]$  (95.0 mg, 0.124 mmol) and amine borane **37** (18.2 mg, 0.124 mmol) was layered with 1 mL of dry PhMe at rt. No substantial exotherm was observed, potentially due to the small scale of the reaction. The resulting two-layer mixture was stirred at rt for ca. 10-20 min, and the top layer containing  $\text{Ph}_3\text{CH}$  byproduct was removed and discarded. The bottom oily layer was washed with 2-3 portions of PhMe (~ 1mL), and then triturated with hexanes, inducing crystallization. X-ray quality crystals were obtained by layering  $\text{CH}_2\text{Cl}_2$  solution of the product with hexanes at rt. X-ray crystallographic study confirmed the proposed B–H borenium structure of **6**.

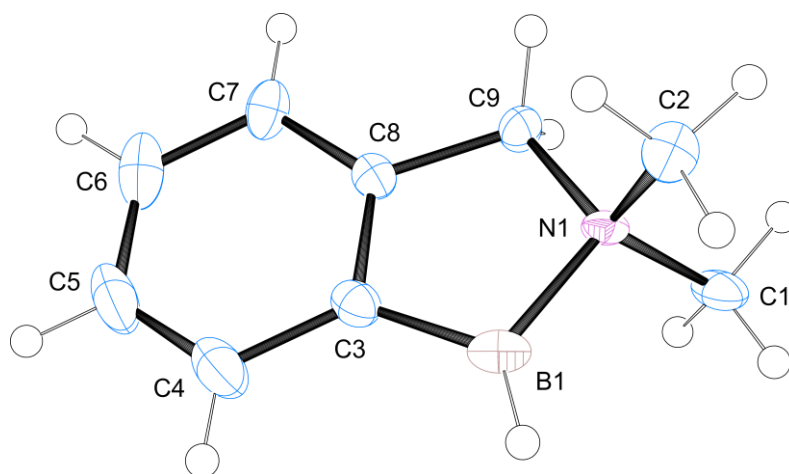

A crystal of dimensions 0.23 x 0.19 x 0.19 mm was mounted on a Bruker SMART APEX CCD-based X-ray diffractometer equipped with a low temperature device and fine focus Mo-target X-ray tube ( $\lambda = 0.71073 \text{ \AA}$ ) operated at 1500 W power (50 kV, 30 mA). The X-ray intensities were measured at 85(1) K; the detector was placed at a distance 5.055 cm from the crystal. A total of 5190 frames were collected with a scan width of  $0.5^\circ$  in  $\theta$  and  $0.45^\circ$  in  $\phi$  with an exposure time of 10 s/frame. The integration of the data yielded a total of 151618 reflections to a maximum  $2\theta$  value of  $72.76^\circ$  of which 6882 were independent and 5395 were greater than  $2\sigma(I)$ . The final cell constants (Table 1) were based

on the xyz centroids of 9701 reflections above  $10\sigma(I)$ . Analysis of the data showed negligible decay during data collection; the data were processed with SADABS and corrected for absorption. The structure was solved and refined with the Bruker SHELXTL (version 2008/4) software package, using the space group Pbam with  $Z = 4$  for the formula  $C_{10}H_{14}B_{12}NCl_{11}$ . All non-hydrogen atoms were refined anisotropically with the hydrogen atoms placed in a mix of idealized and refined positions. Both the borolidine cation and carba-closo-dodecaborate anion lie on mirror planes in the crystal lattice. The borolidine cation is disordered. Full matrix least-squares refinement based on  $F^2$  converged at  $R1 = 0.0398$  and  $wR2 = 0.0923$  [based on  $I > 2\sigma(I)$ ],  $R1 = 0.0570$  and  $wR2 = 0.1005$  for all data. Additional details are given as Supporting Information in a CIF file.

Sheldrick, G.M. SHELXTL, v. 2008/4; Bruker Analytical X-ray, Madison, WI, 2008.

Saint Plus, v. 7.60A, Bruker Analytical X-ray, Madison, WI, 2009.

Sheldrick, G.M. SADABS, v. 2008/1. Program for Empirical Absorption Correction of Area Detector Data, University of Gottingen: Gottingen, Germany, 2008.

## X-Ray Crystallography Details of **20**

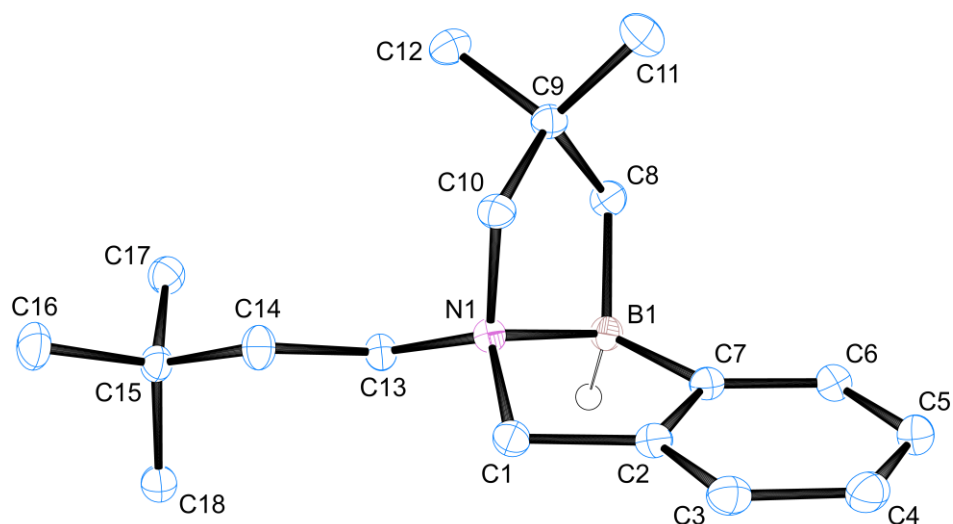

Colorless plates of **20** were grown from a *n*-heptane solution at 23 °C. A crystal of dimensions 0.26x0.16x0.12 mm was mounted on a Bruker SMART APEX-I CCD-based X-ray diffractometer equipped with a low temperature device and fine focus Mo-target X-ray tube ( $\lambda = 0.71073$  Å) operated at 1500 W power (50 kV, 30 mA). The X-ray intensities were measured at 85(1) K; the detector was placed at a distance 5.070 cm from the crystal. A total of 3615 frames were collected with a scan width

of  $0.5^\circ$  in  $\theta$  and  $0.45^\circ$  in  $\phi$  with an exposure time of 15 s/frame. The integration of the data yielded a total of 26822 reflections to a maximum  $2\theta$  value of  $63.44^\circ$  of which 5648 were independent and 4635 were greater than  $2\sigma(I)$ . The final cell constants (Table 1) were based on the xyz centroids of 9958 reflections above  $10\sigma(I)$ . Analysis of the data showed negligible decay during data collection; the data were processed with SADABS and corrected for absorption. The structure was solved and refined with the Bruker SHELXTL (version 2008/4) software package, using the space group  $P\bar{1}$  with  $Z = 2$  for the formula  $C_{18}H_{30}BN$ . All non-hydrogen atoms were refined anisotropically with the hydrogen atoms placed in idealized or refined positions. Full matrix least-squares refinement based on  $F^2$  converged at  $R1 = 0.0474$  and  $wR2 = 0.1235$  [based on  $I > 2\sigma(I)$ ],  $R1 = 0.0587$  and  $wR2 = 0.1339$  for all data. Additional details are given as Supporting Information in a CIF file.

Sheldrick, G.M. SHELXTL, v. 2008/4; Bruker Analytical X-ray, Madison, WI, 2008.

Saint Plus, v. 7.60A, Bruker Analytical X-ray, Madison, WI, 2009.

Sheldrick, G.M. SADABS, v. 2008/1. Program for Empirical Absorption Correction of Area Detector Data, University of Gottingen: Gottingen, Germany, 2008.

## X-Ray Crystallography Details of **30**

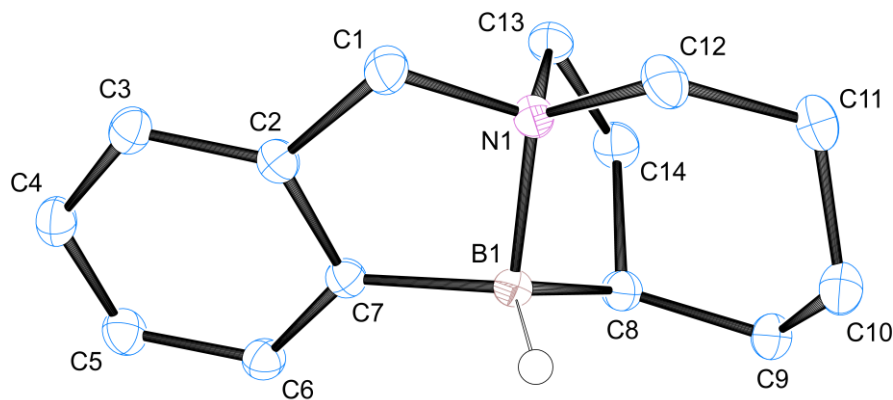

Colorless needles of **30** were grown from a *n*-heptane solution at  $23^\circ\text{C}$ . A crystal of dimensions  $0.20 \times 0.14 \times 0.08$  mm was mounted on a Bruker SMART APEX-I CCD-based X-ray diffractometer equipped with a low temperature device and fine focus Mo-target X-ray tube ( $\lambda = 0.71073$  Å) operated at 1500 W power (50 kV, 30 mA). The X-ray intensities were measured at  $85(1)$  K; the detector was placed at a distance 5.070 cm from the crystal. A total of 2487 frames were collected with a scan width of  $0.5^\circ$  in  $\theta$  and  $0.45^\circ$  in  $\phi$  with an exposure time of 30 s/frame. The integration of the data yielded a

total of 25403 reflections to a maximum  $2\theta$  value of  $59.20^\circ$  of which 3374 were independent and 2755 were greater than  $2\sigma(I)$ . The final cell constants (Table 1) were based on the xyz centroids of 8505 reflections above  $10\sigma(I)$ . Analysis of the data showed negligible decay during data collection; the data were processed with SADABS and corrected for absorption. The structure was solved and refined with the Bruker SHELXTL (version 2008/4) software package, using the space group C2/c with  $Z = 8$  for the formula  $C_{14}H_{20}BN$ . All non-hydrogen atoms were refined anisotropically with the hydrogen atoms placed in idealized and refined positions. Full matrix least-squares refinement based on  $F^2$  converged at  $R1 = 0.0518$  and  $wR2 = 0.1338$  [based on  $I > 2\sigma(I)$ ],  $R1 = 0.0640$  and  $wR2 = 0.1455$  for all data. Additional details are given as Supporting Information in a CIF file.

Sheldrick, G.M. SHELXTL, v. 2008/4; Bruker Analytical X-ray, Madison, WI, 2008.

Saint Plus, v. 7.60A, Bruker Analytical X-ray, Madison, WI, 2009.

Sheldrick, G.M. SADABS, v. 2008/1. Program for Empirical Absorption Correction of Area Detector Data, University of Gottingen: Gottingen, Germany, 2008.

## **NMR Spectra**

$^1\text{H}$  NMR (500 MHz),  
 $\text{CD}_2\text{Cl}_2$

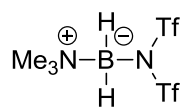

**12a**

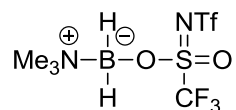

**13a**

(7:1)

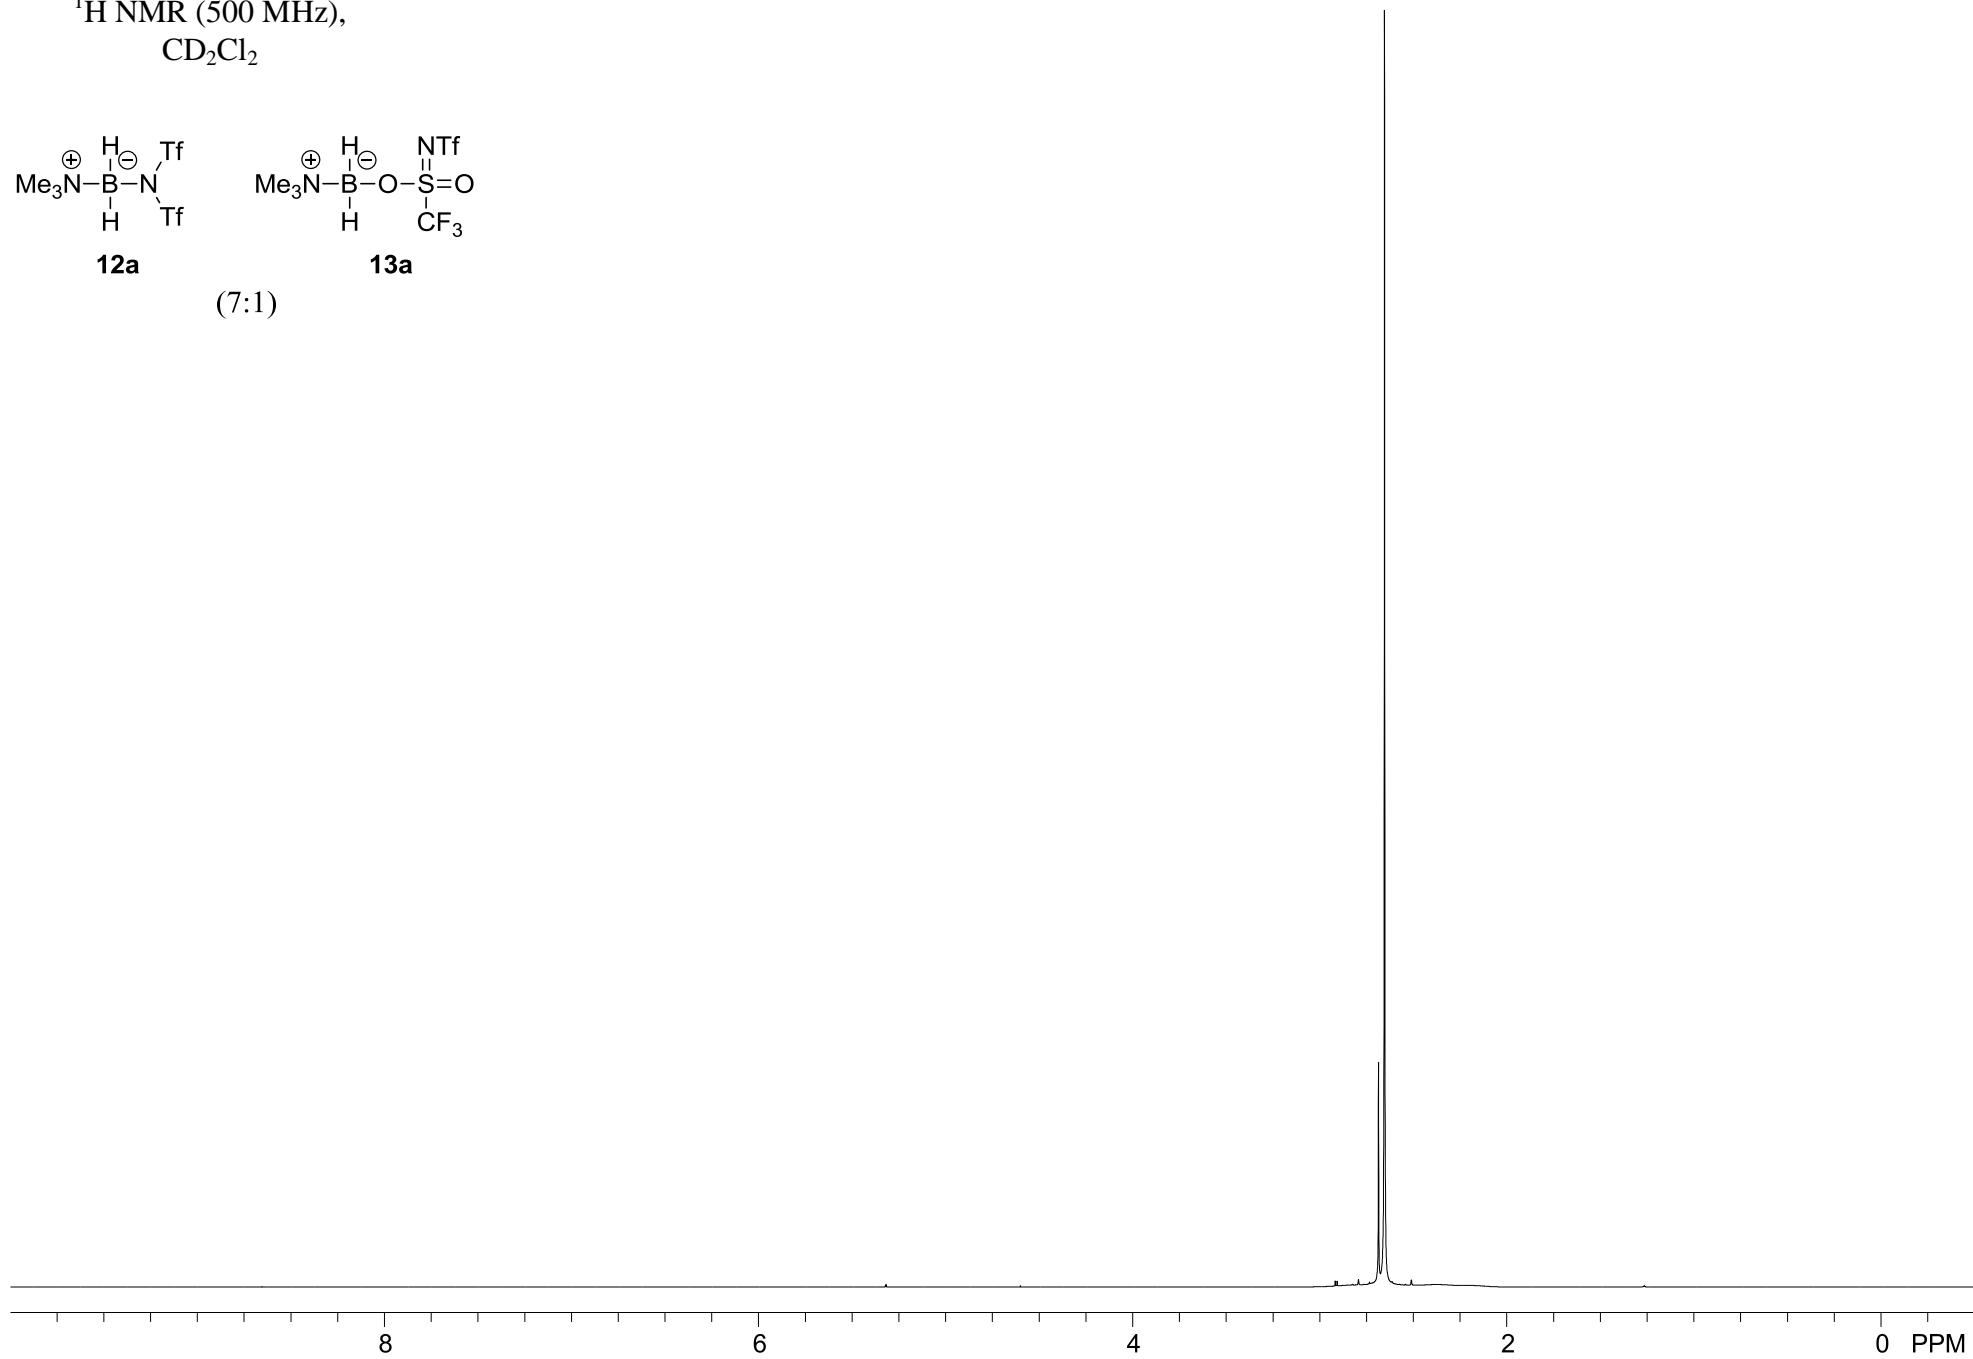



$^{11}\text{B}$  NMR (160 MHz),  
 $\text{CD}_2\text{Cl}_2$

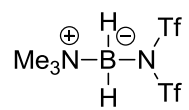

**12a**

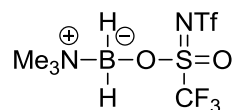

**13a**

(7:1)

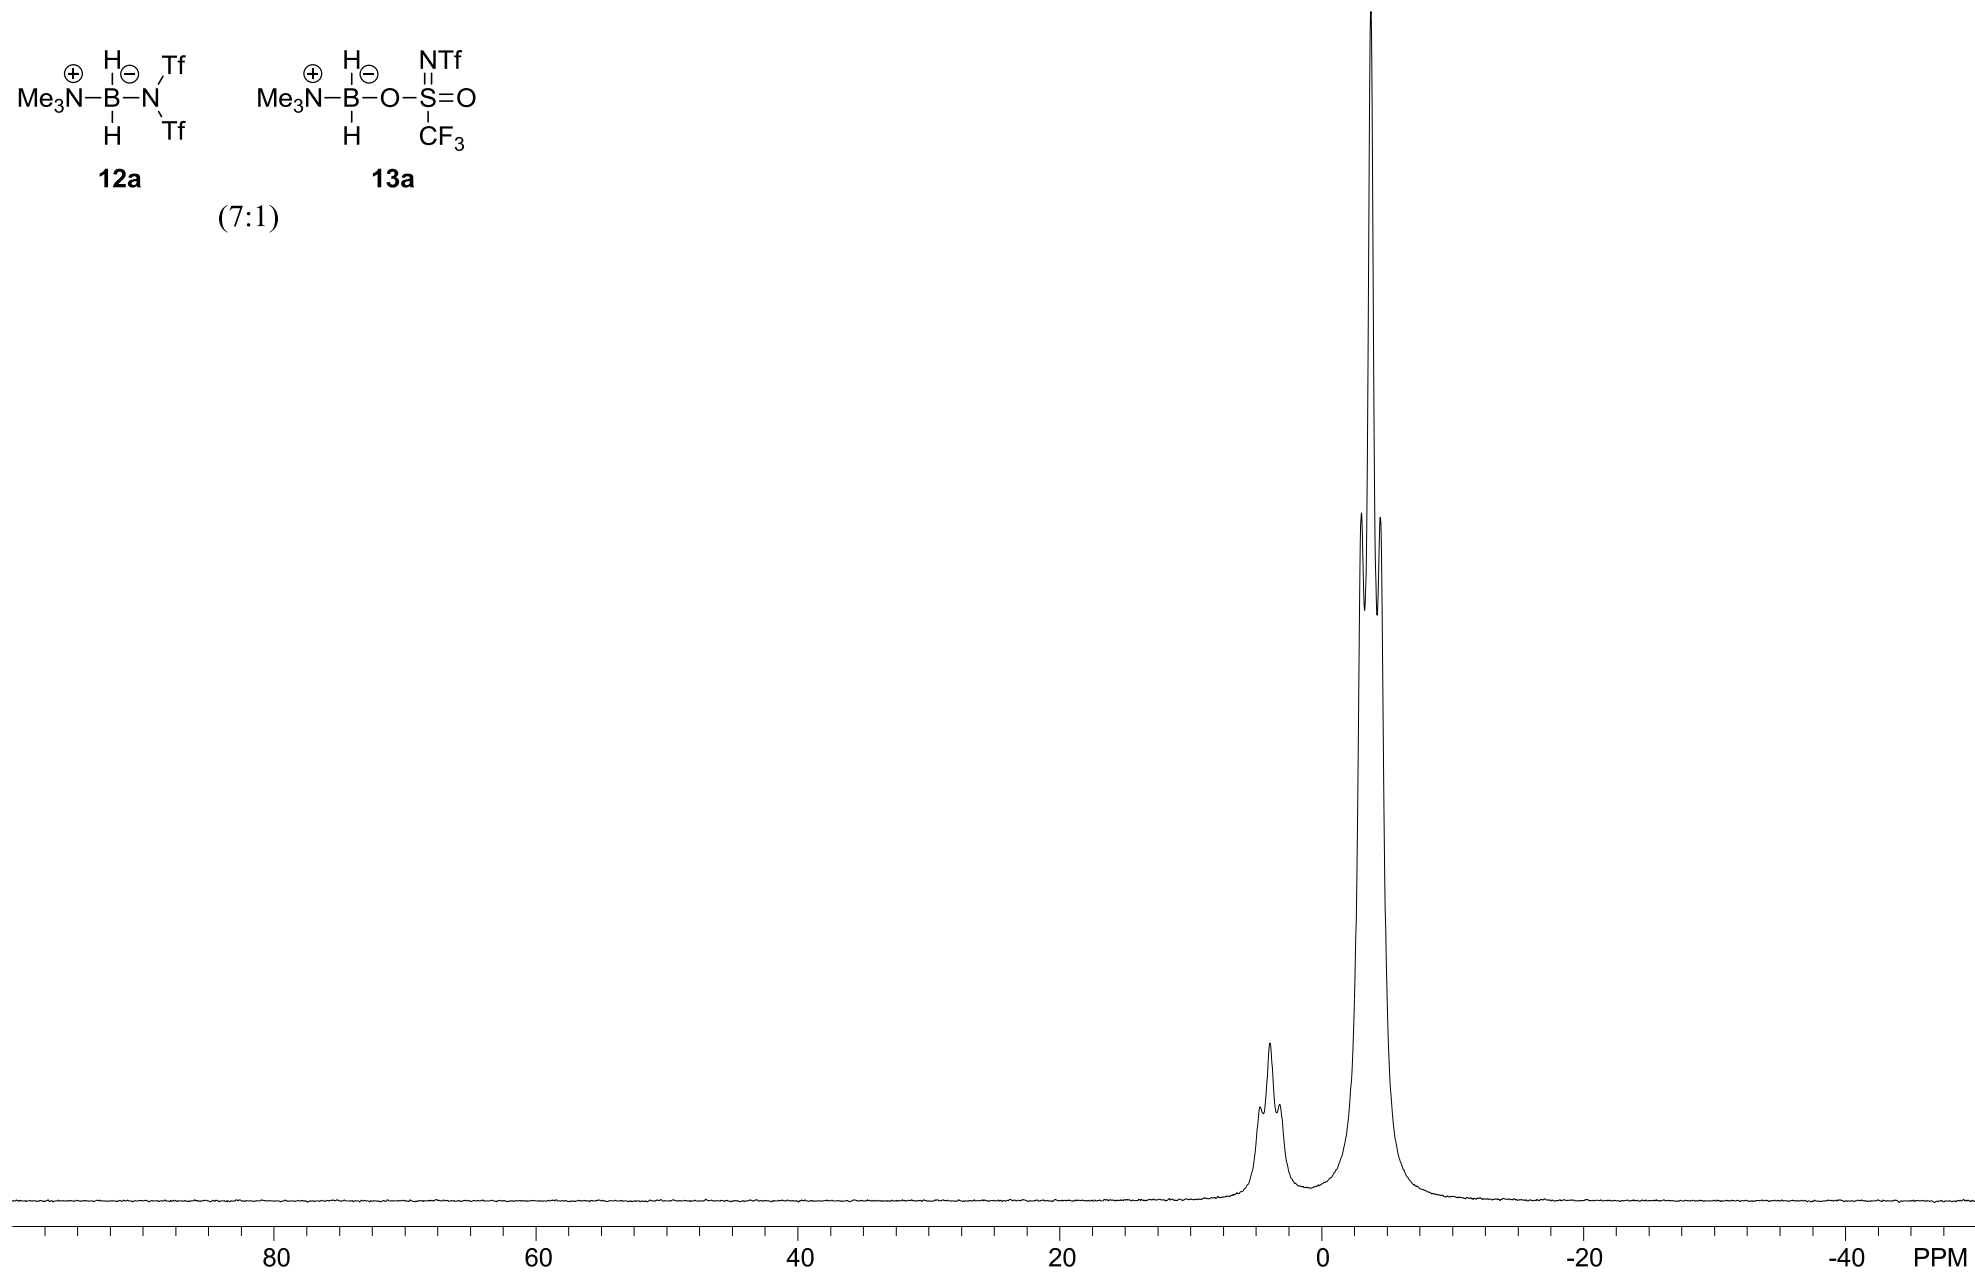

$^{11}\text{B}\{^1\text{H}\}$  NMR (160 MHz),  
 $\text{CD}_2\text{Cl}_2$

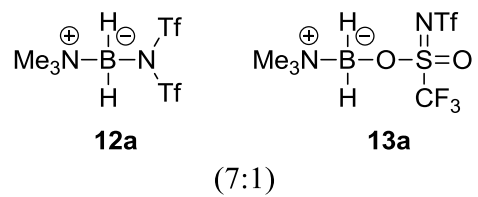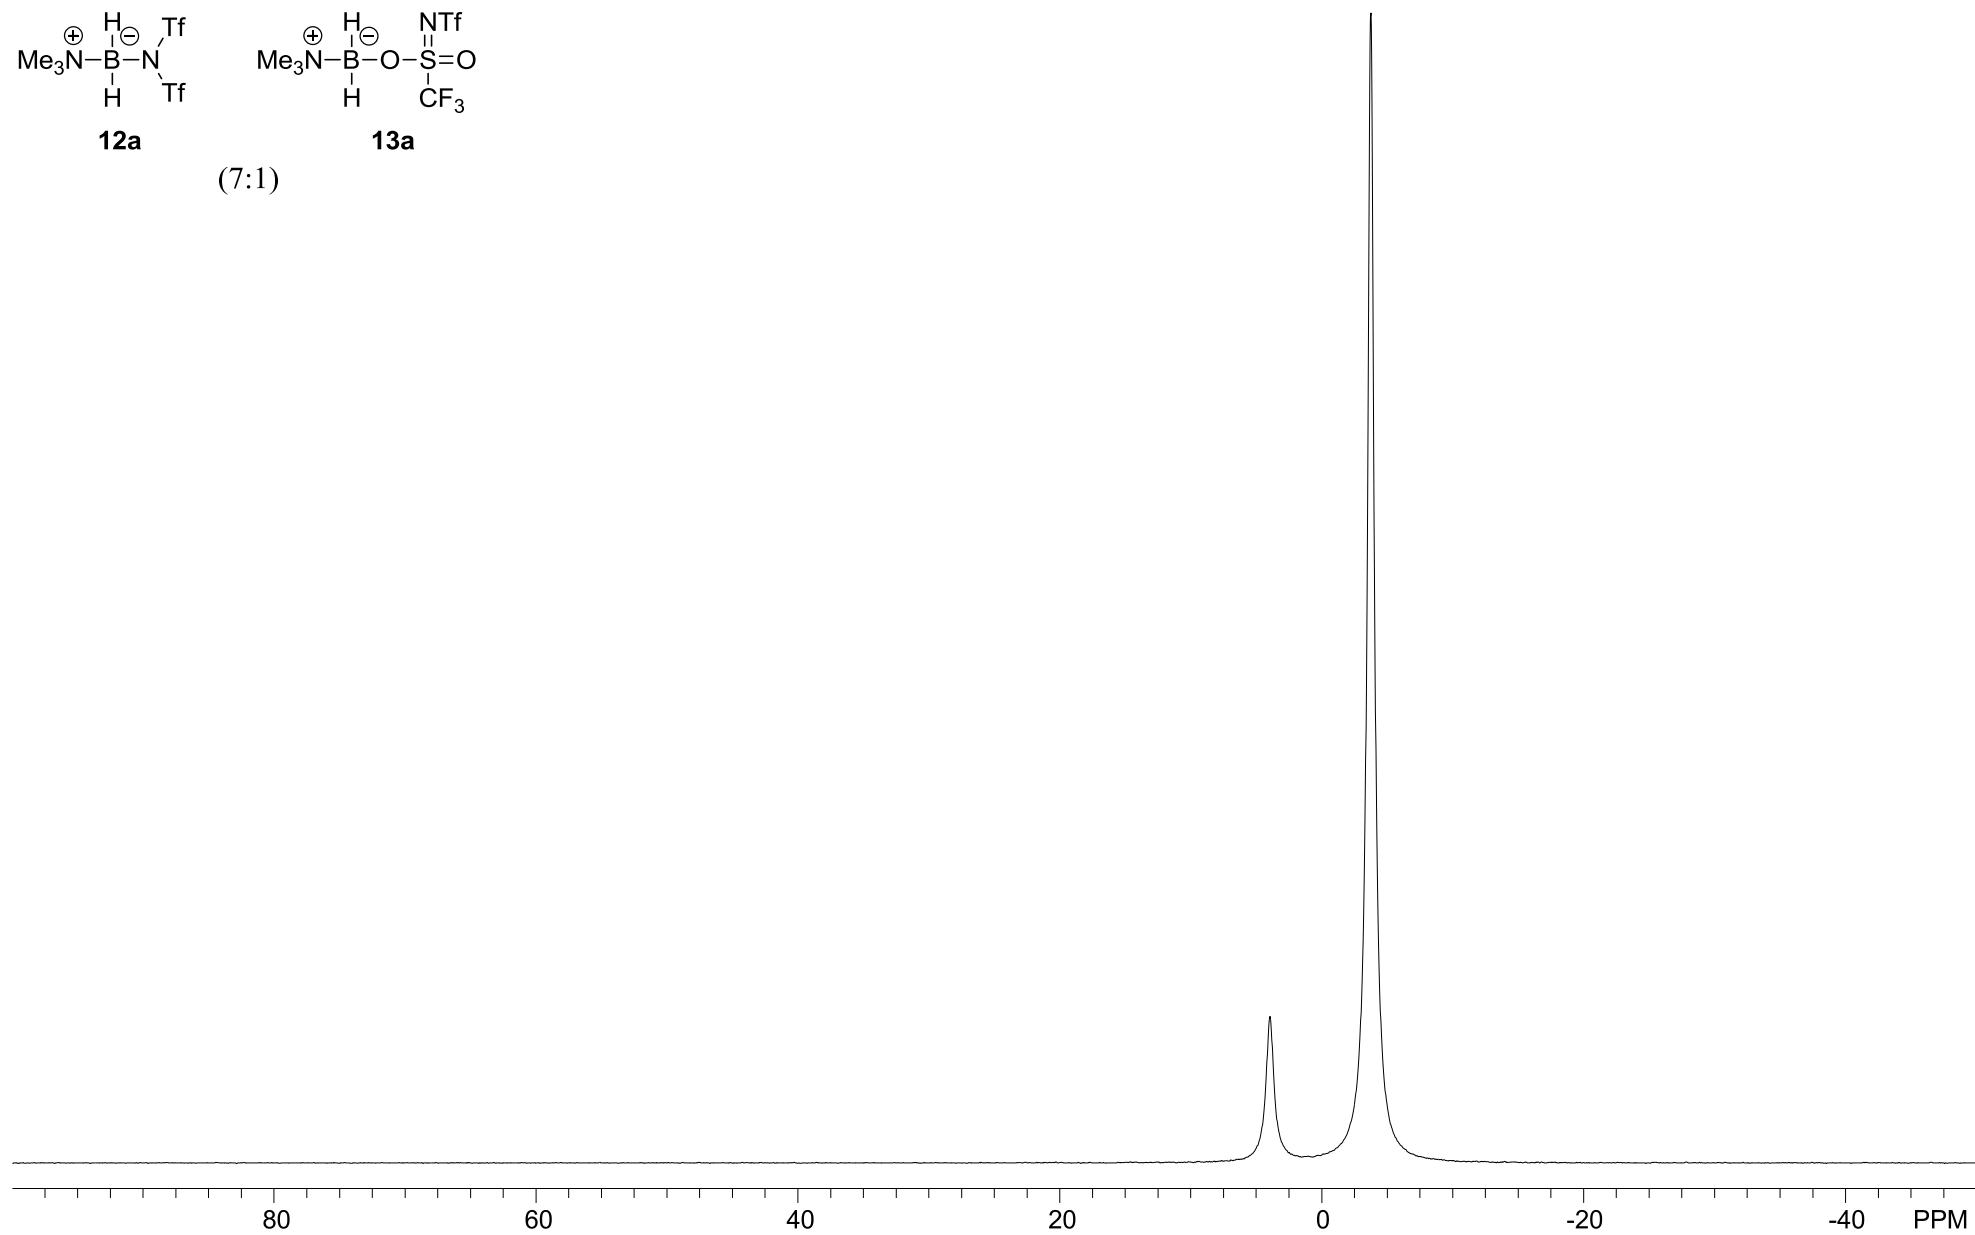

$^{13}\text{C}\{^1\text{H}\}$  NMR (126 MHz),  
 $\text{CD}_2\text{Cl}_2$

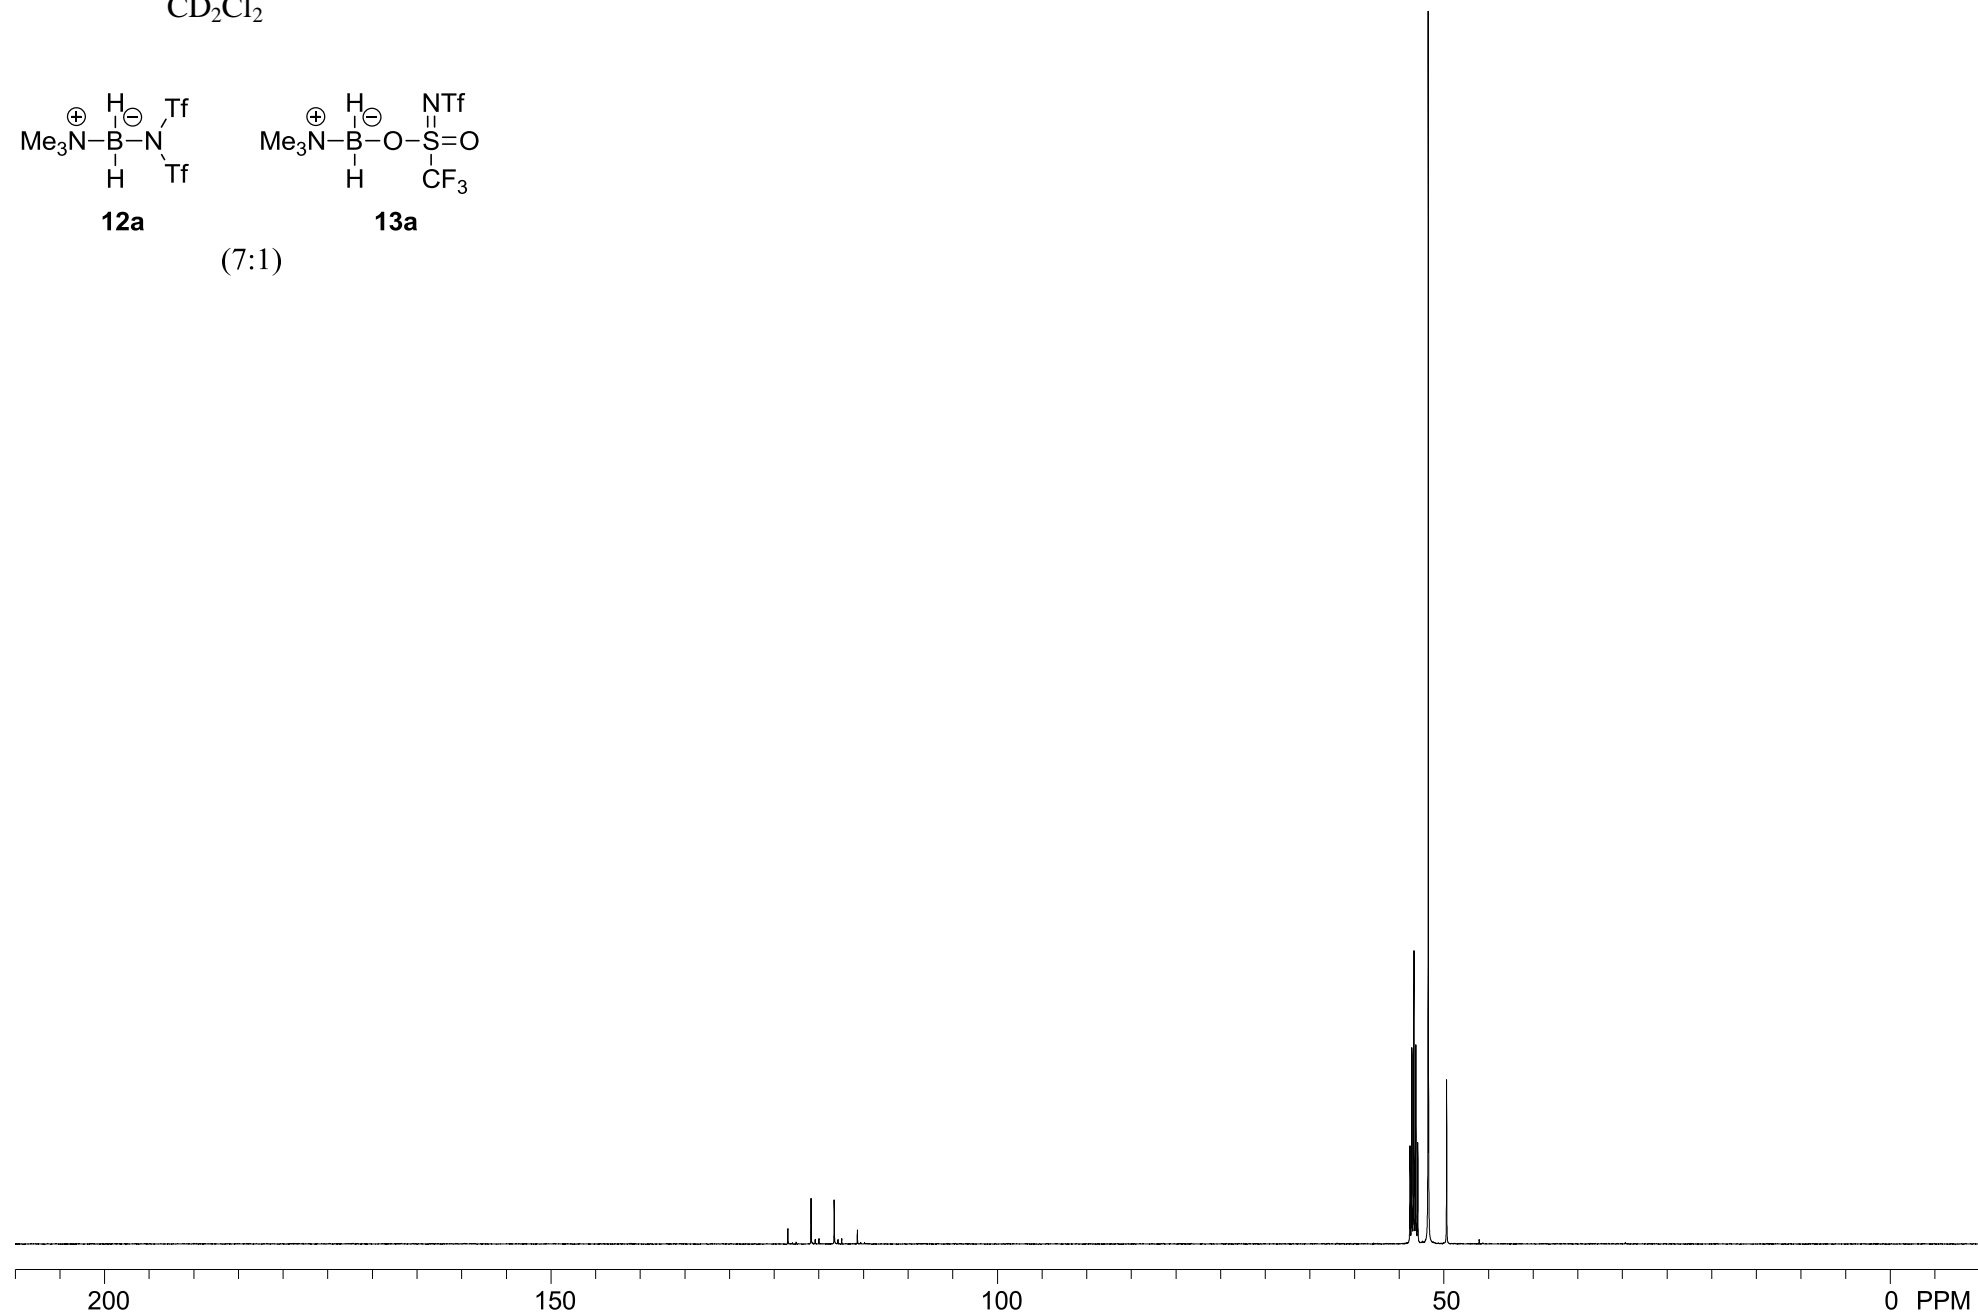

$^{19}\text{F}$  NMR (471 MHz),  
 $\text{CD}_2\text{Cl}_2$



**12a**



**13a**

(7:1)

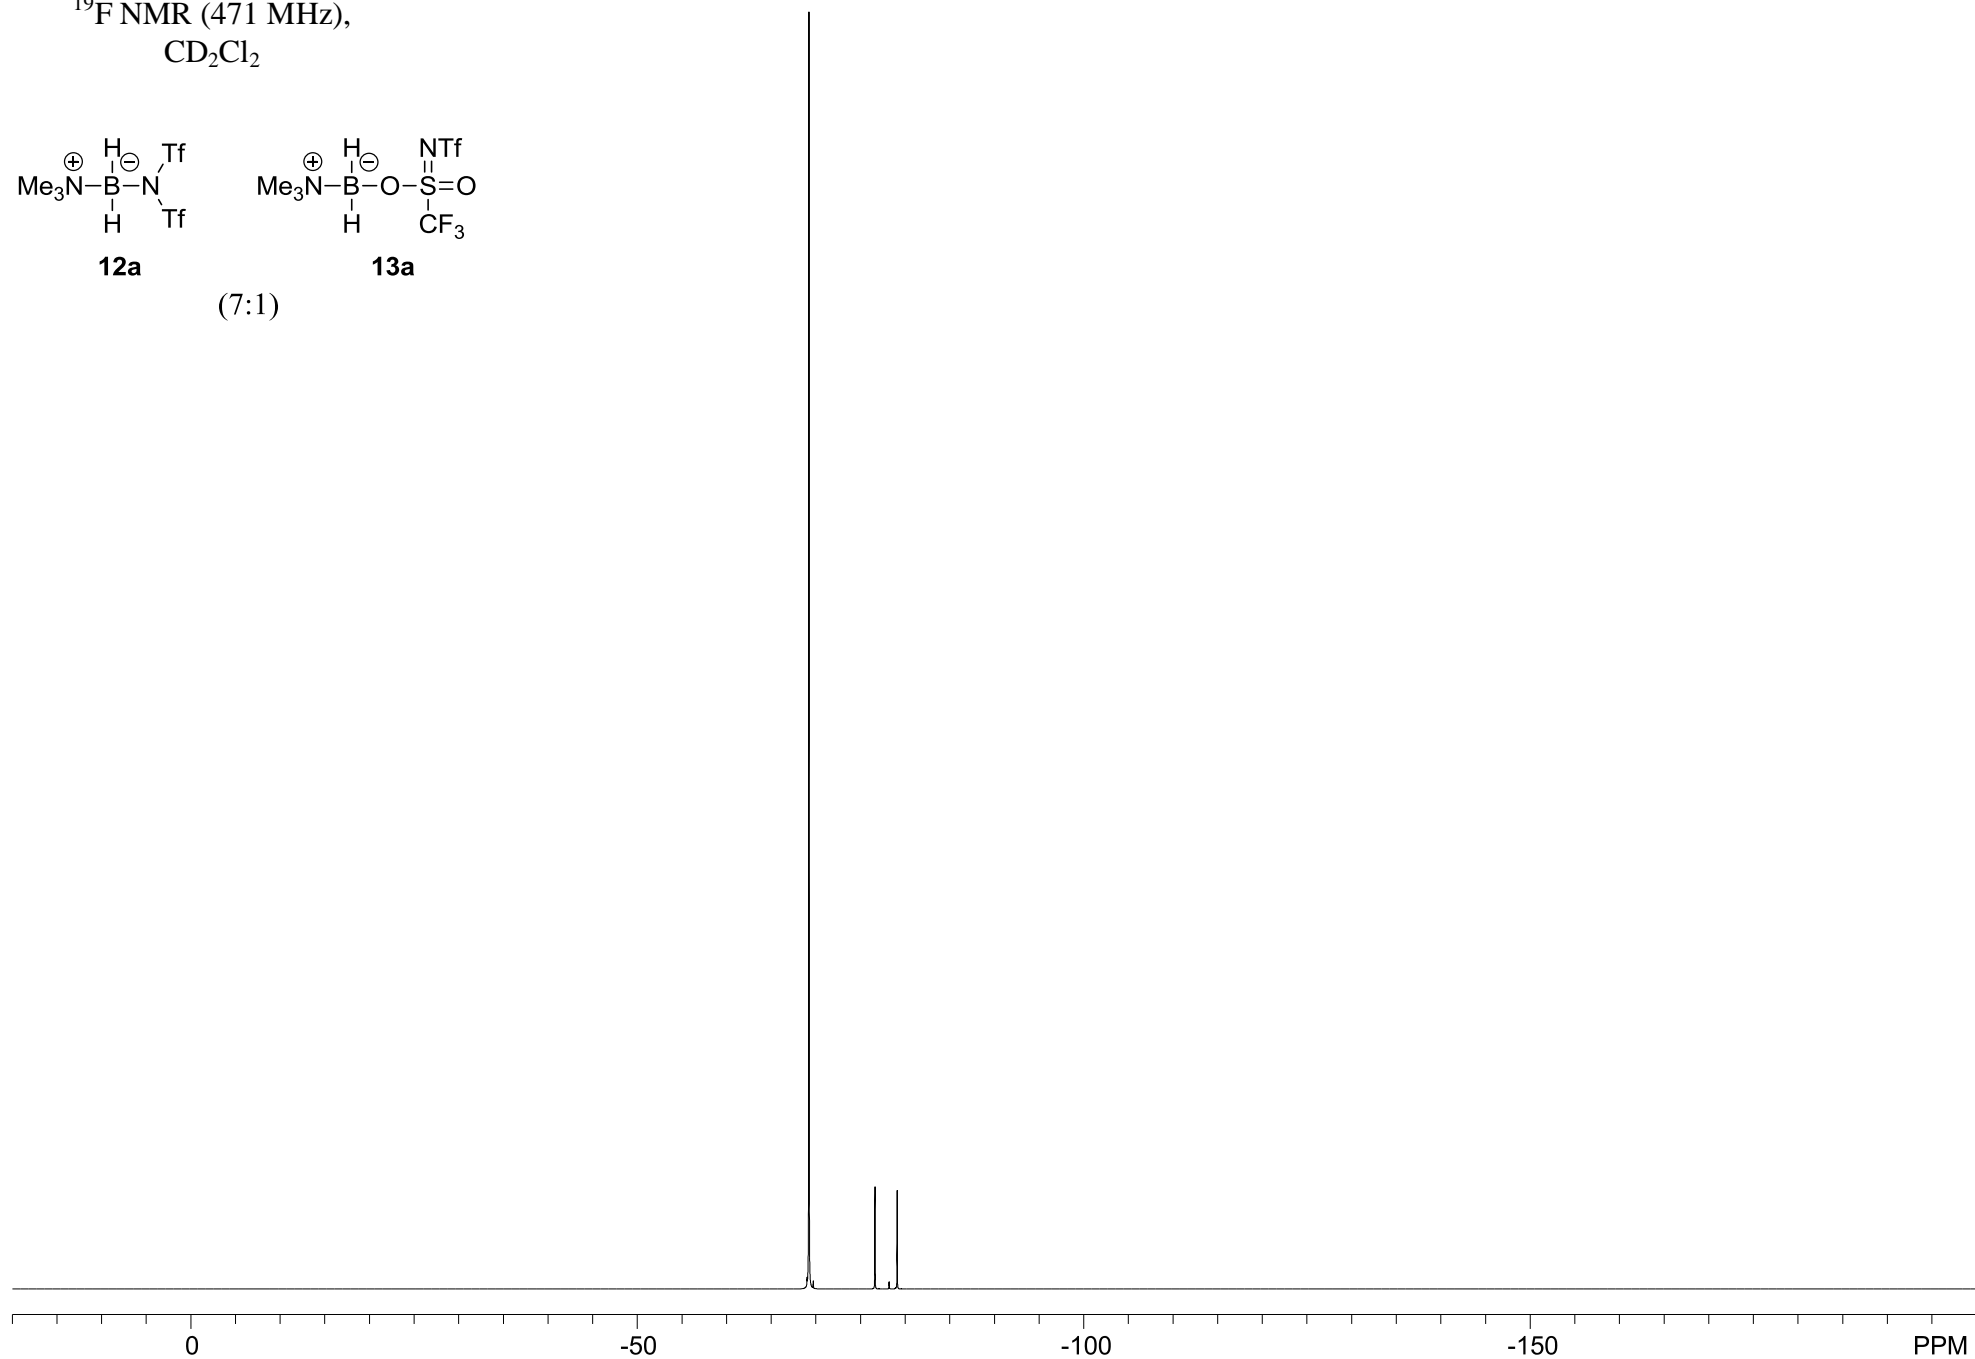

$^1\text{H}$  NMR (500 MHz),  
 $\text{CD}_2\text{Cl}_2$

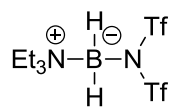

**12b**

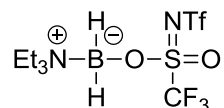

**13b**

(1:4.7)

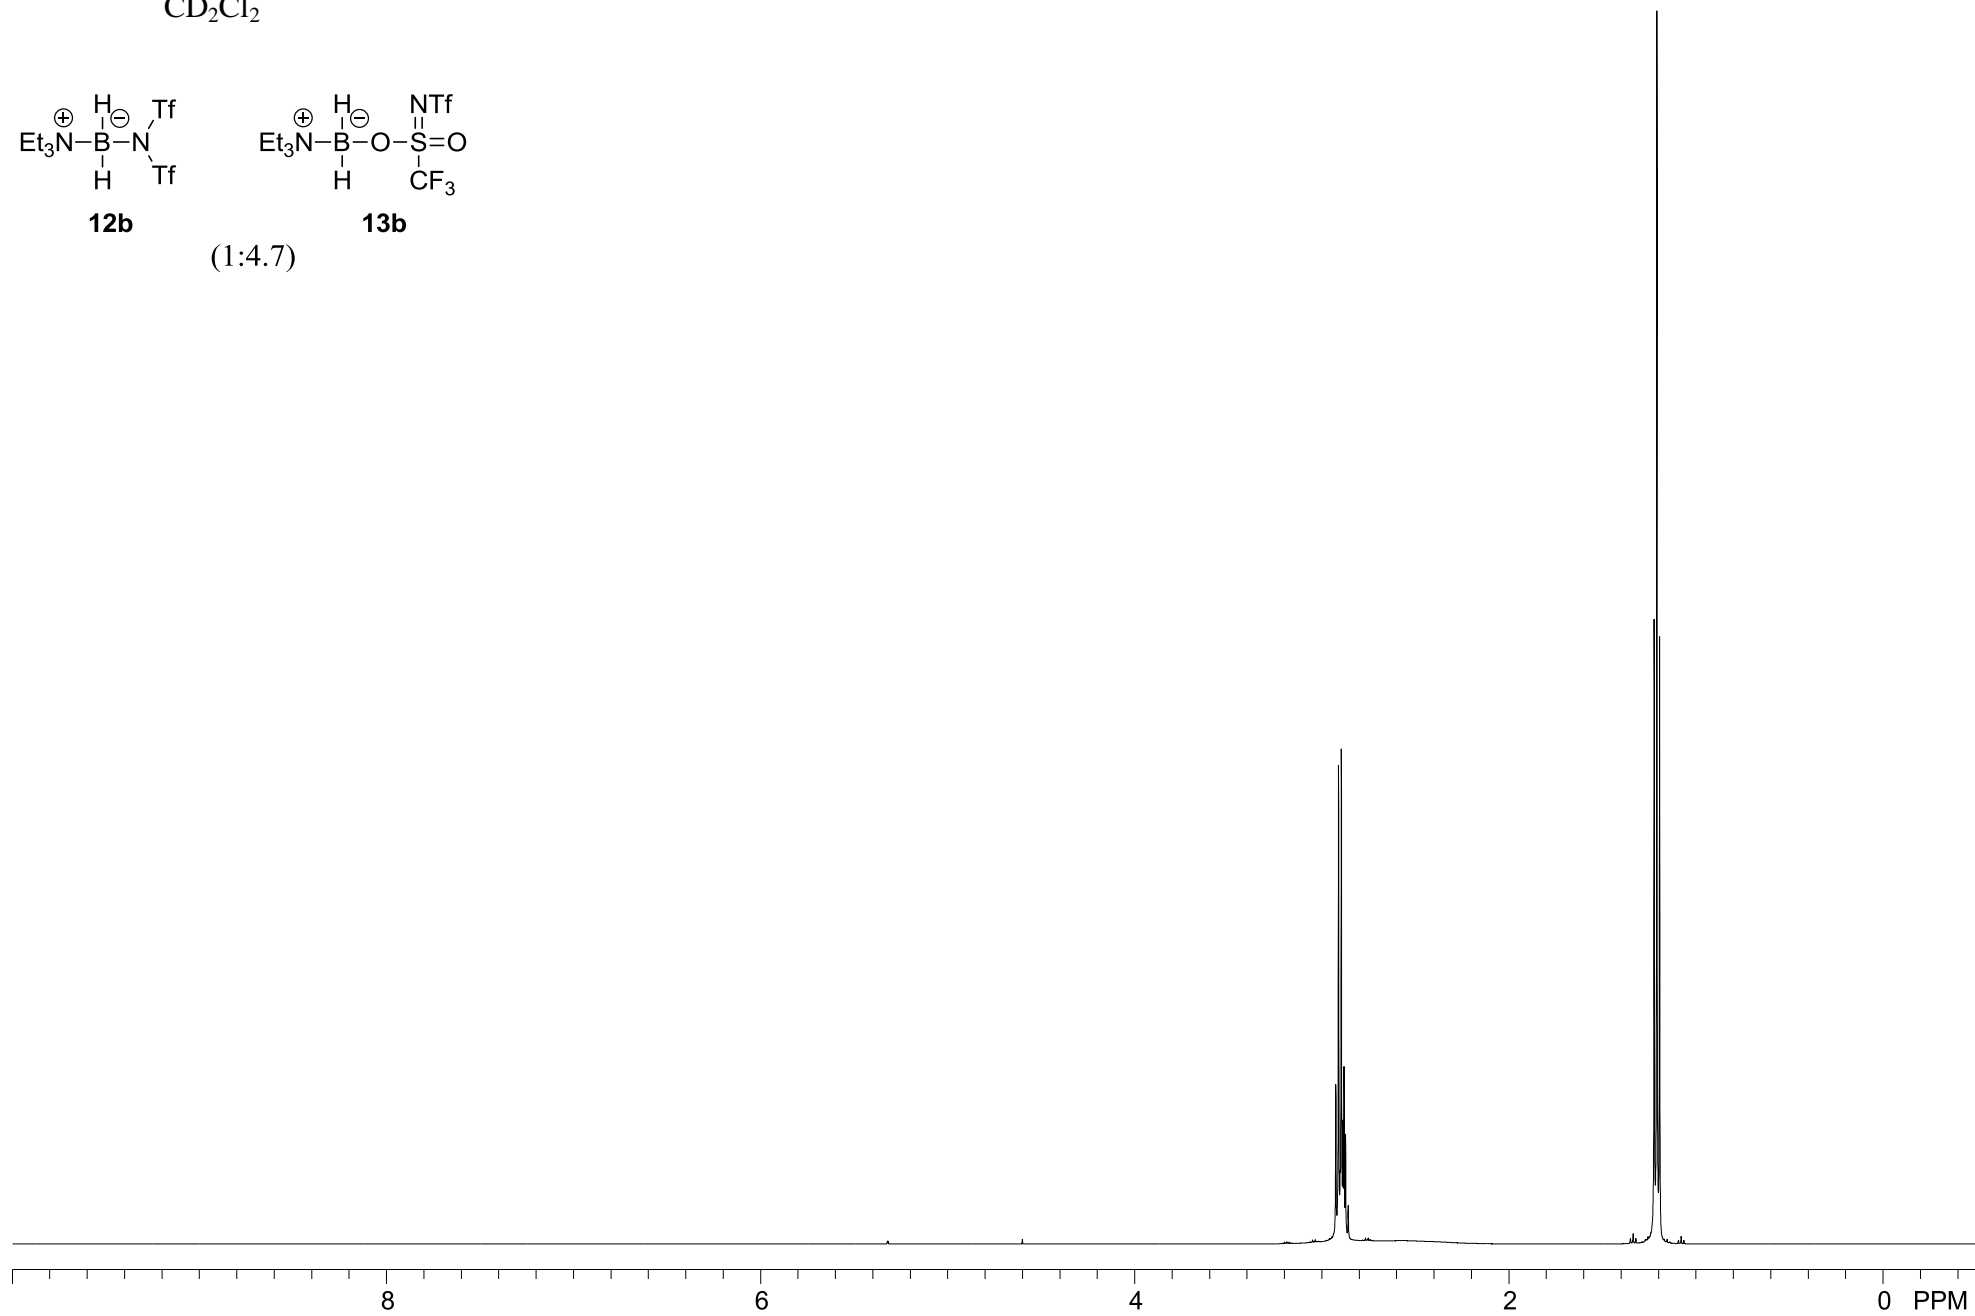

$^{11}\text{B}$  NMR (160 MHz),  
 $\text{CD}_2\text{Cl}_2$

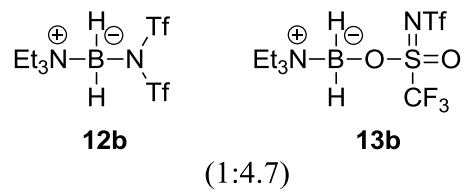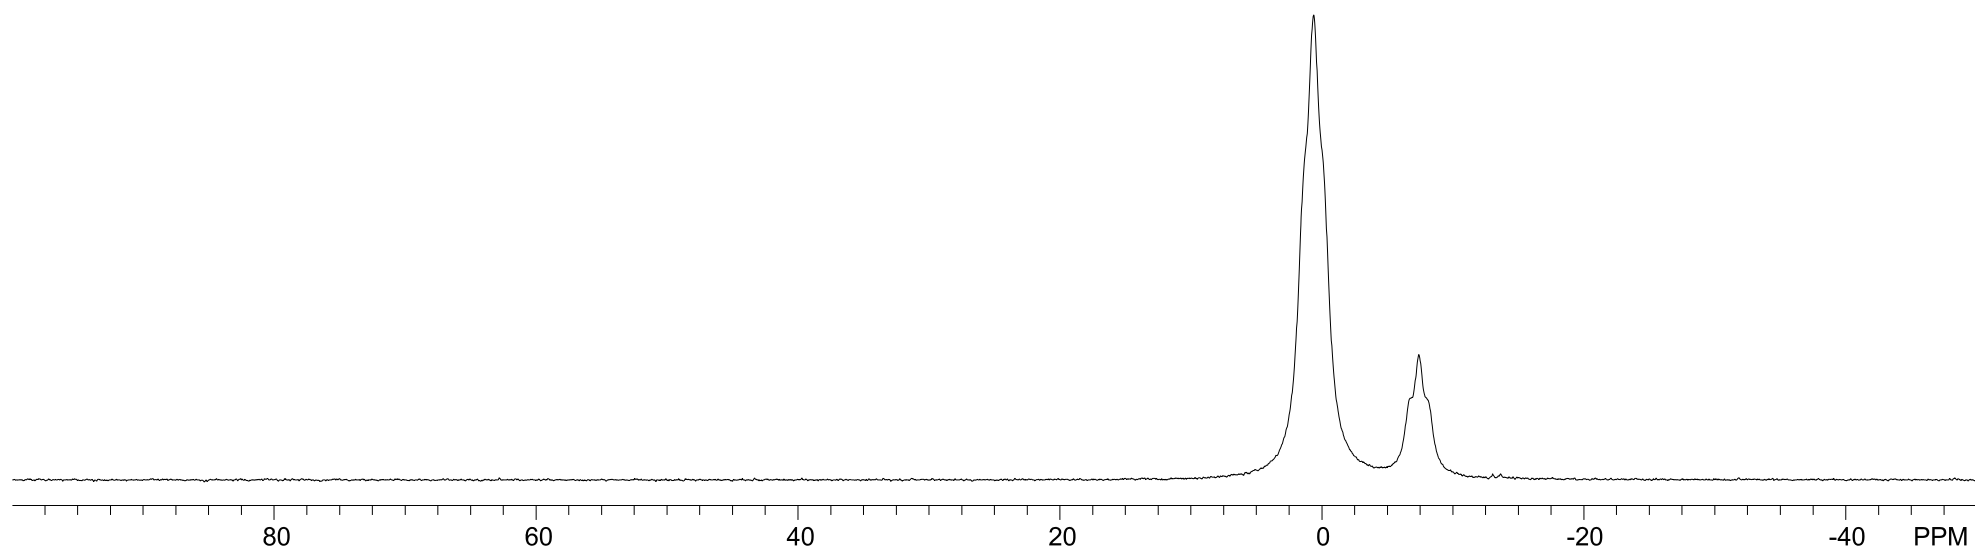

$^{11}\text{B}\{^1\text{H}\}$  NMR (160 MHz),  
 $\text{CD}_2\text{Cl}_2$

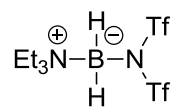

**12b**

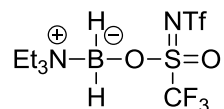

**13b**

(1:4.7)

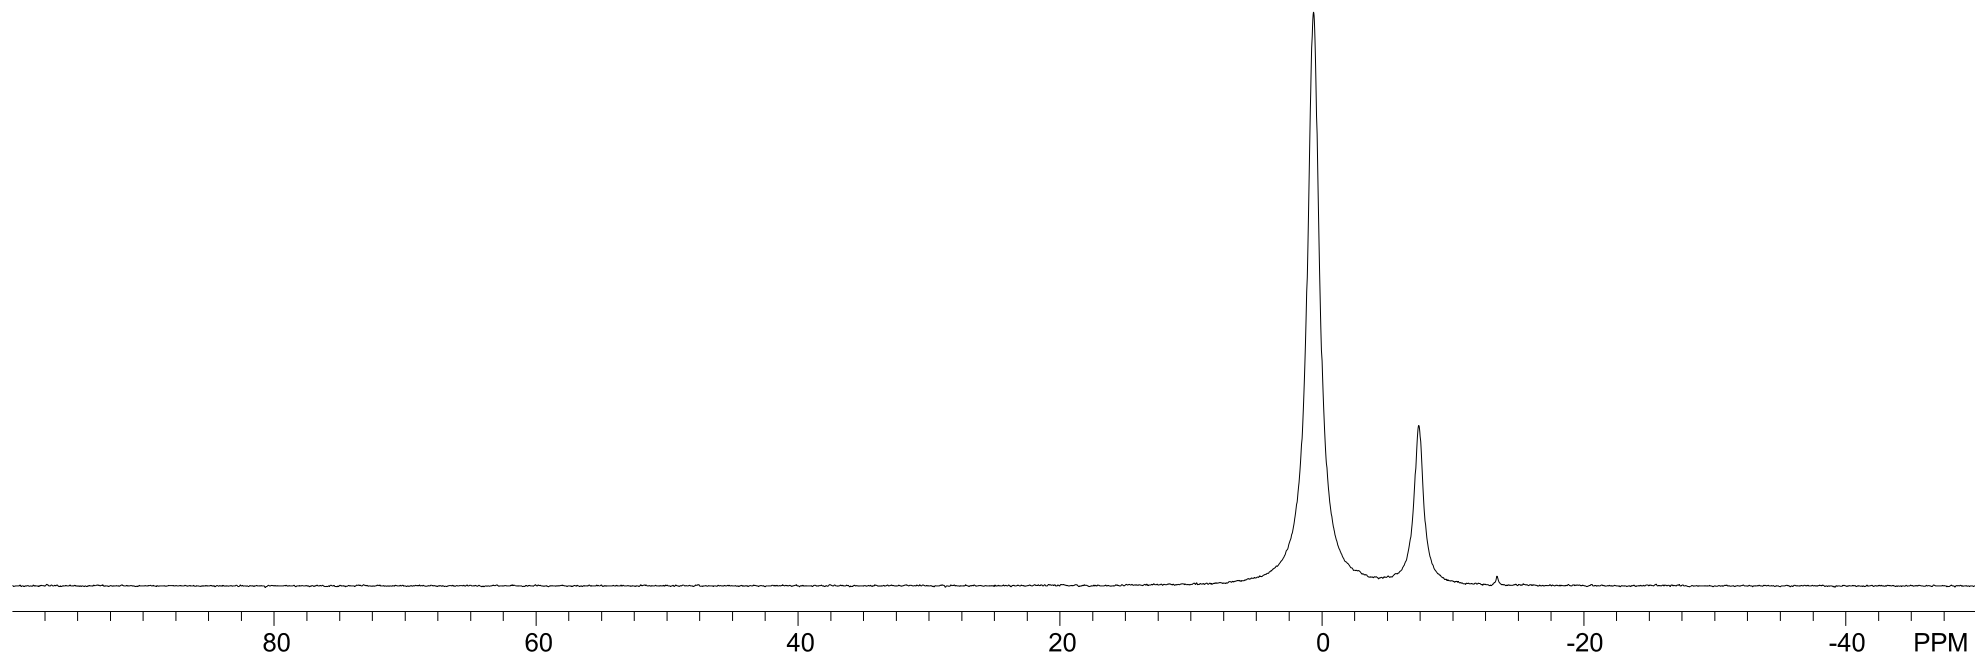

$^{13}\text{C}\{^1\text{H}\}$  NMR (126 MHz),  
 $\text{CD}_2\text{Cl}_2$

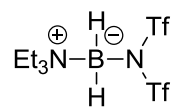

**12b**



**13b**

(1:4.7)

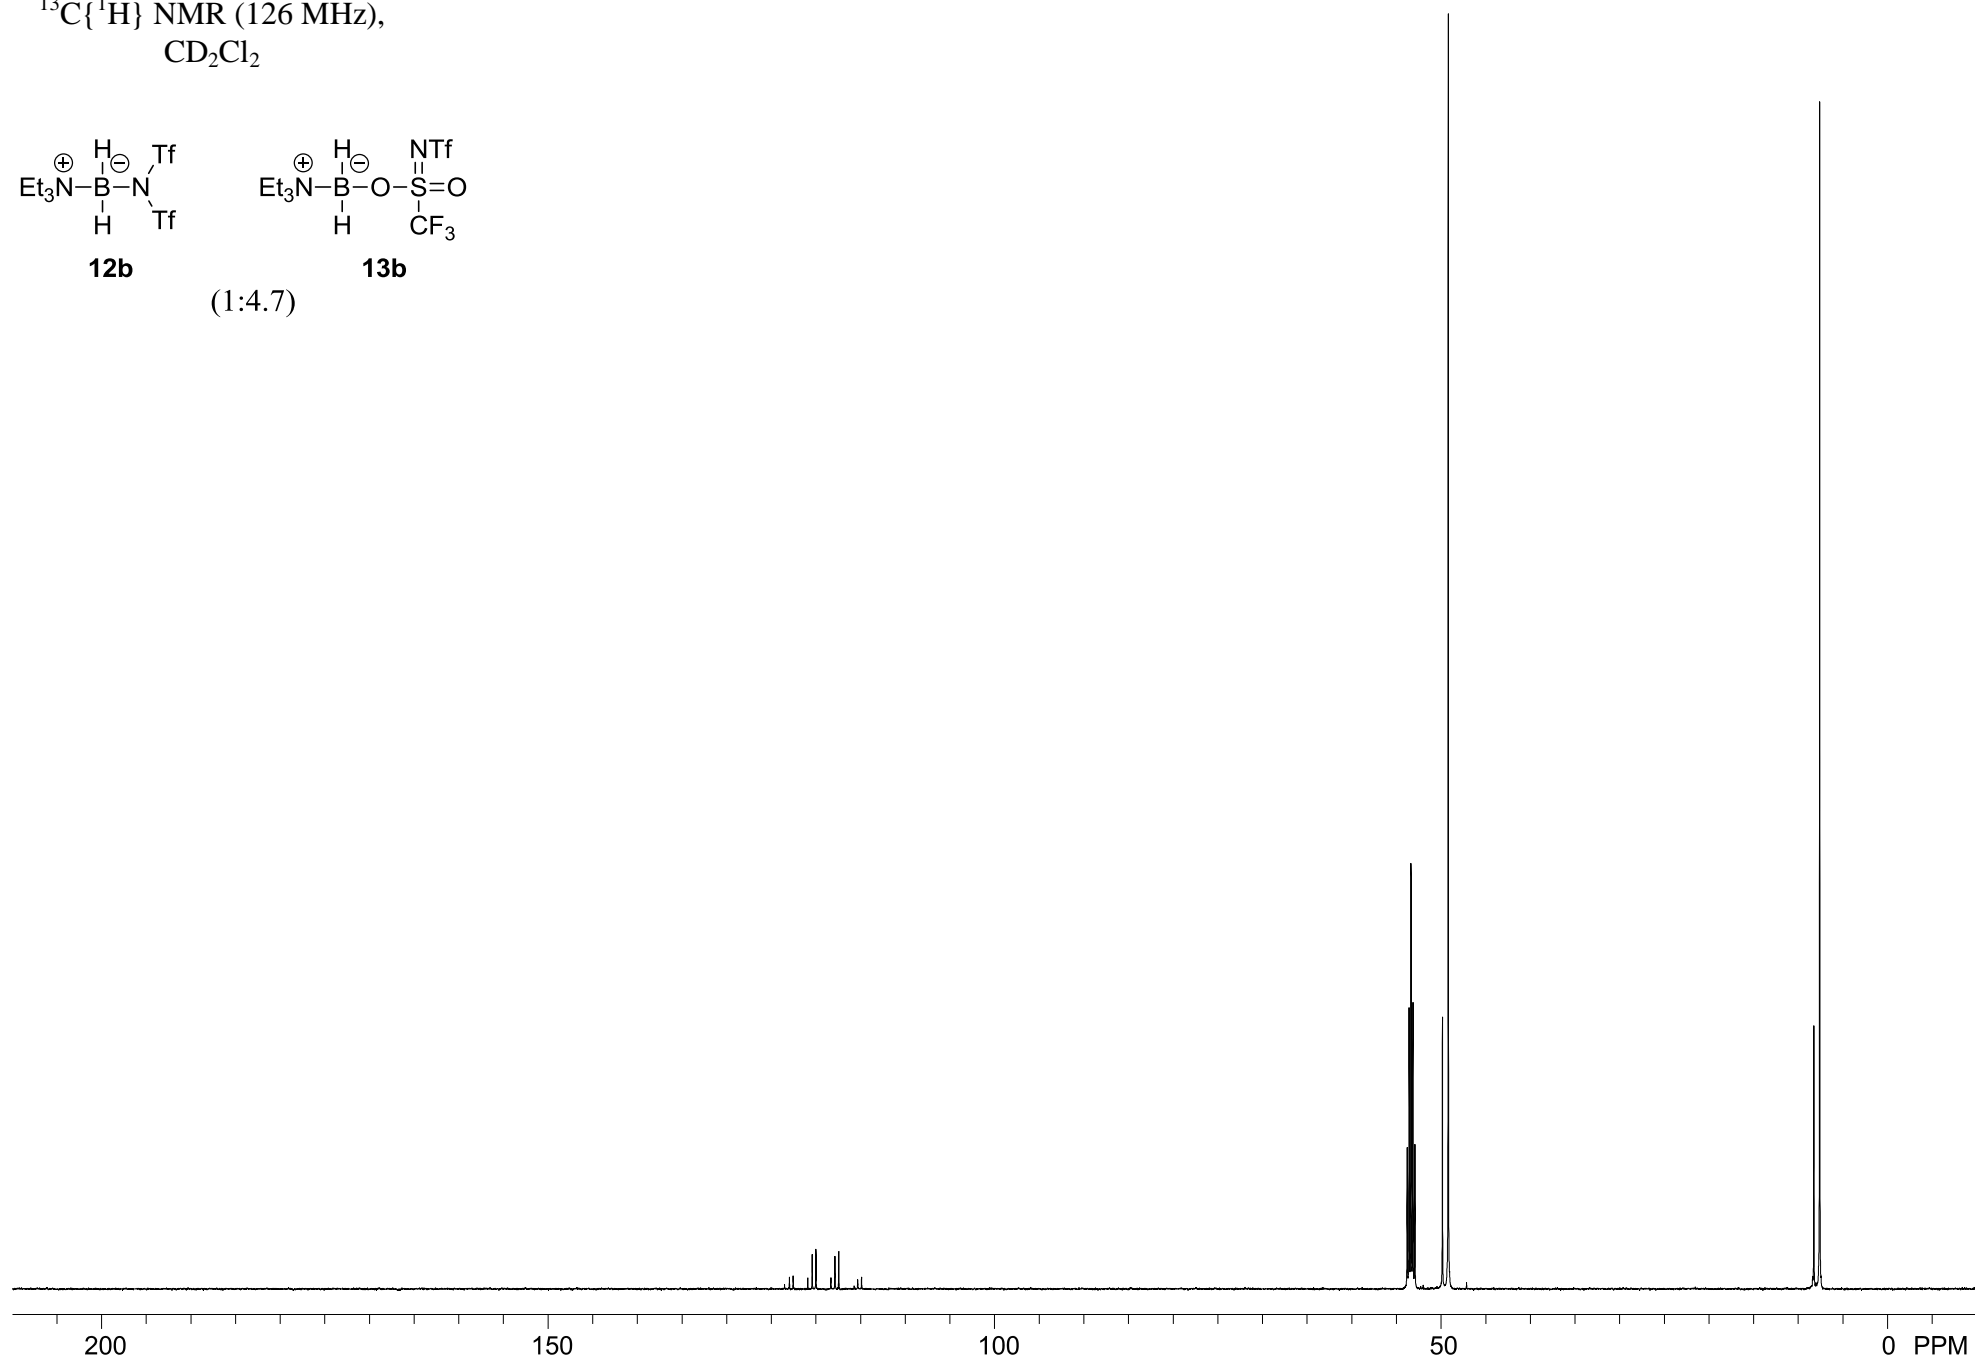



$^{19}\text{F}$  NMR (471 MHz),  
 $\text{CD}_2\text{Cl}_2$



**12b**



**13b**

(1:4.7)

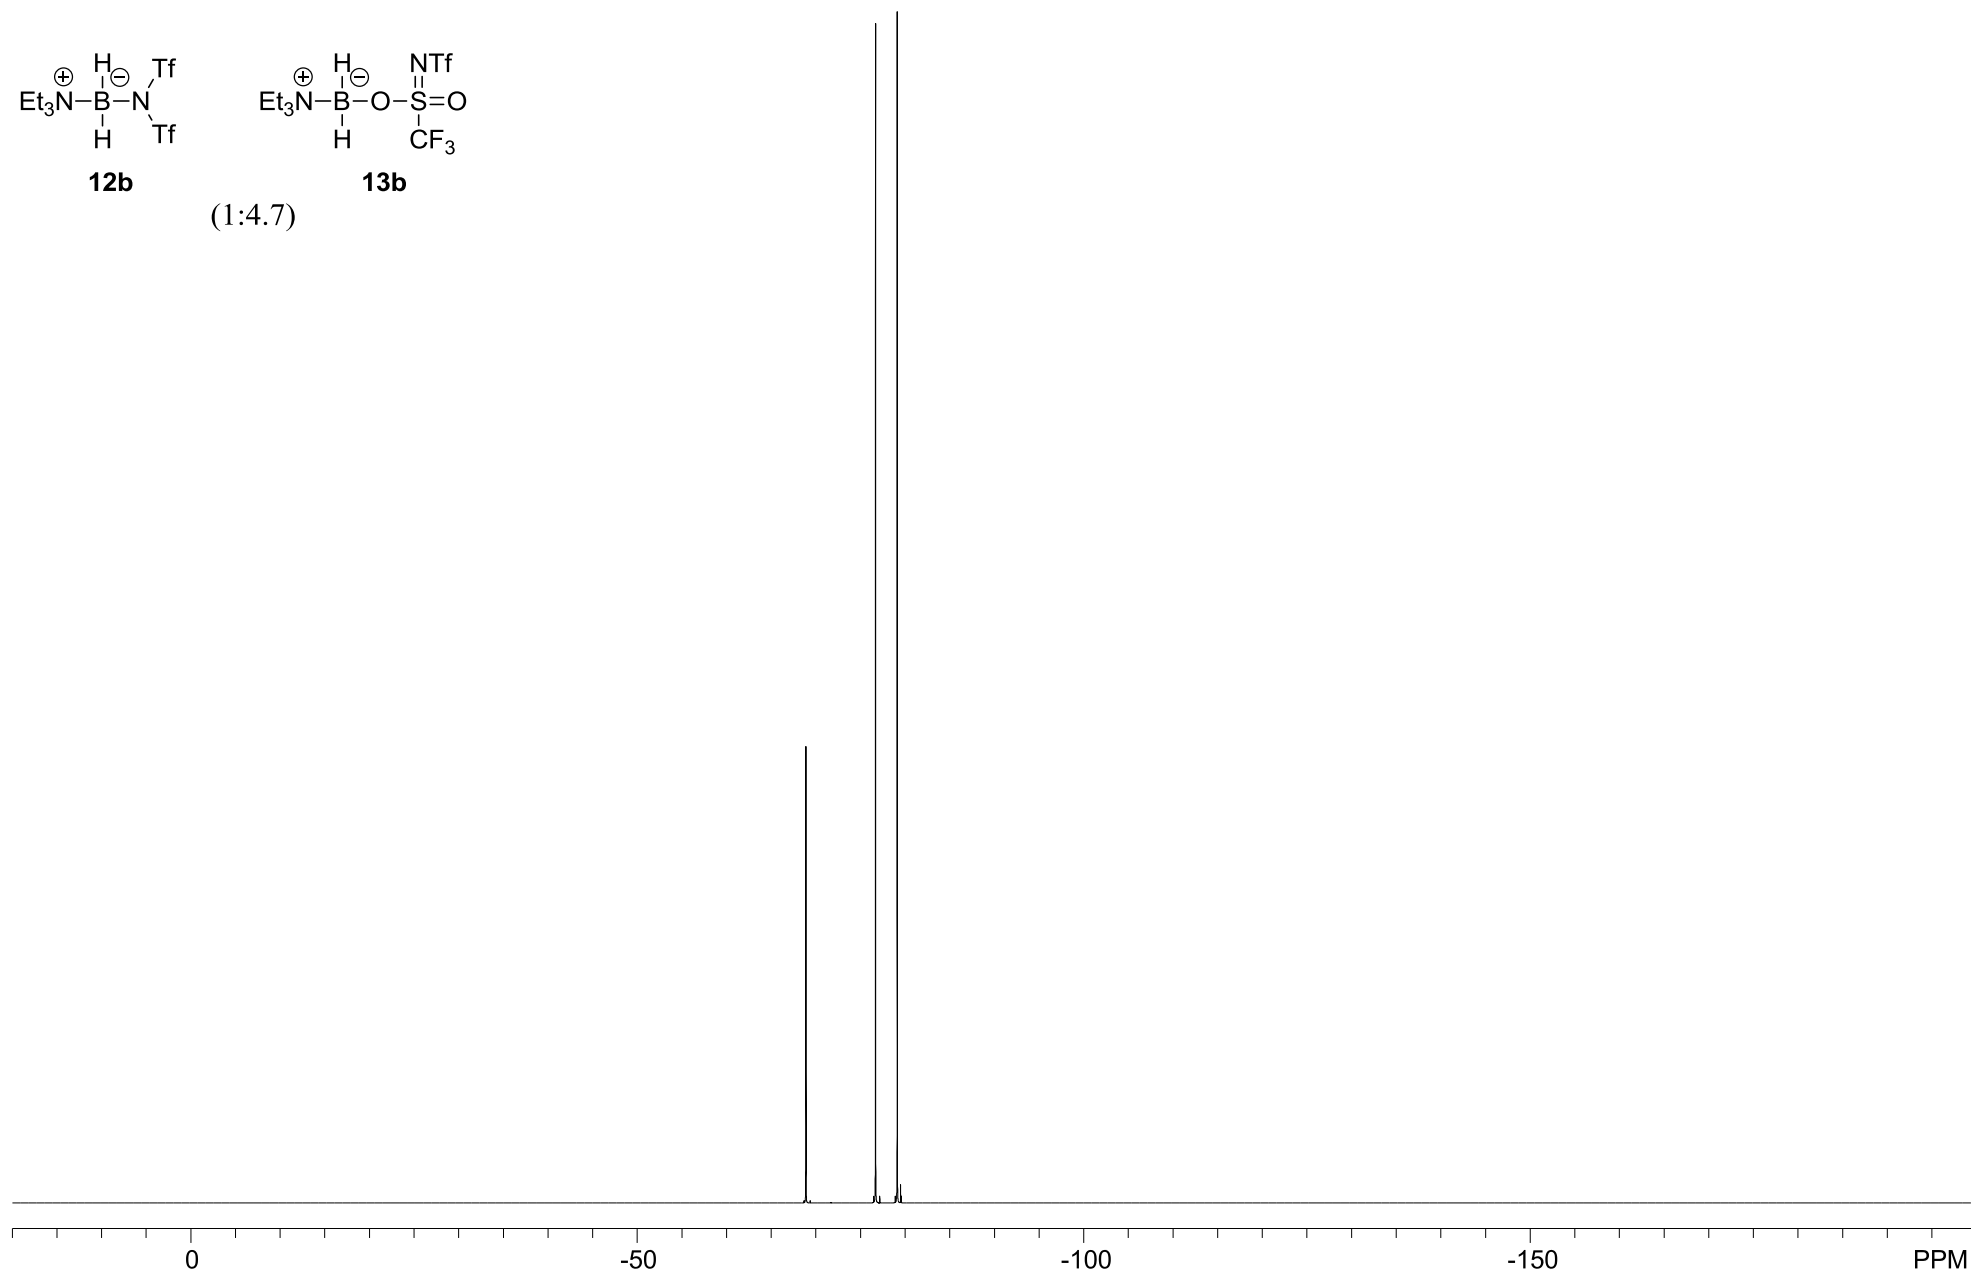

$^1\text{H}$  NMR (500 MHz),  
 $\text{CD}_2\text{Cl}_2$

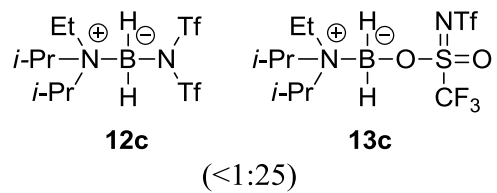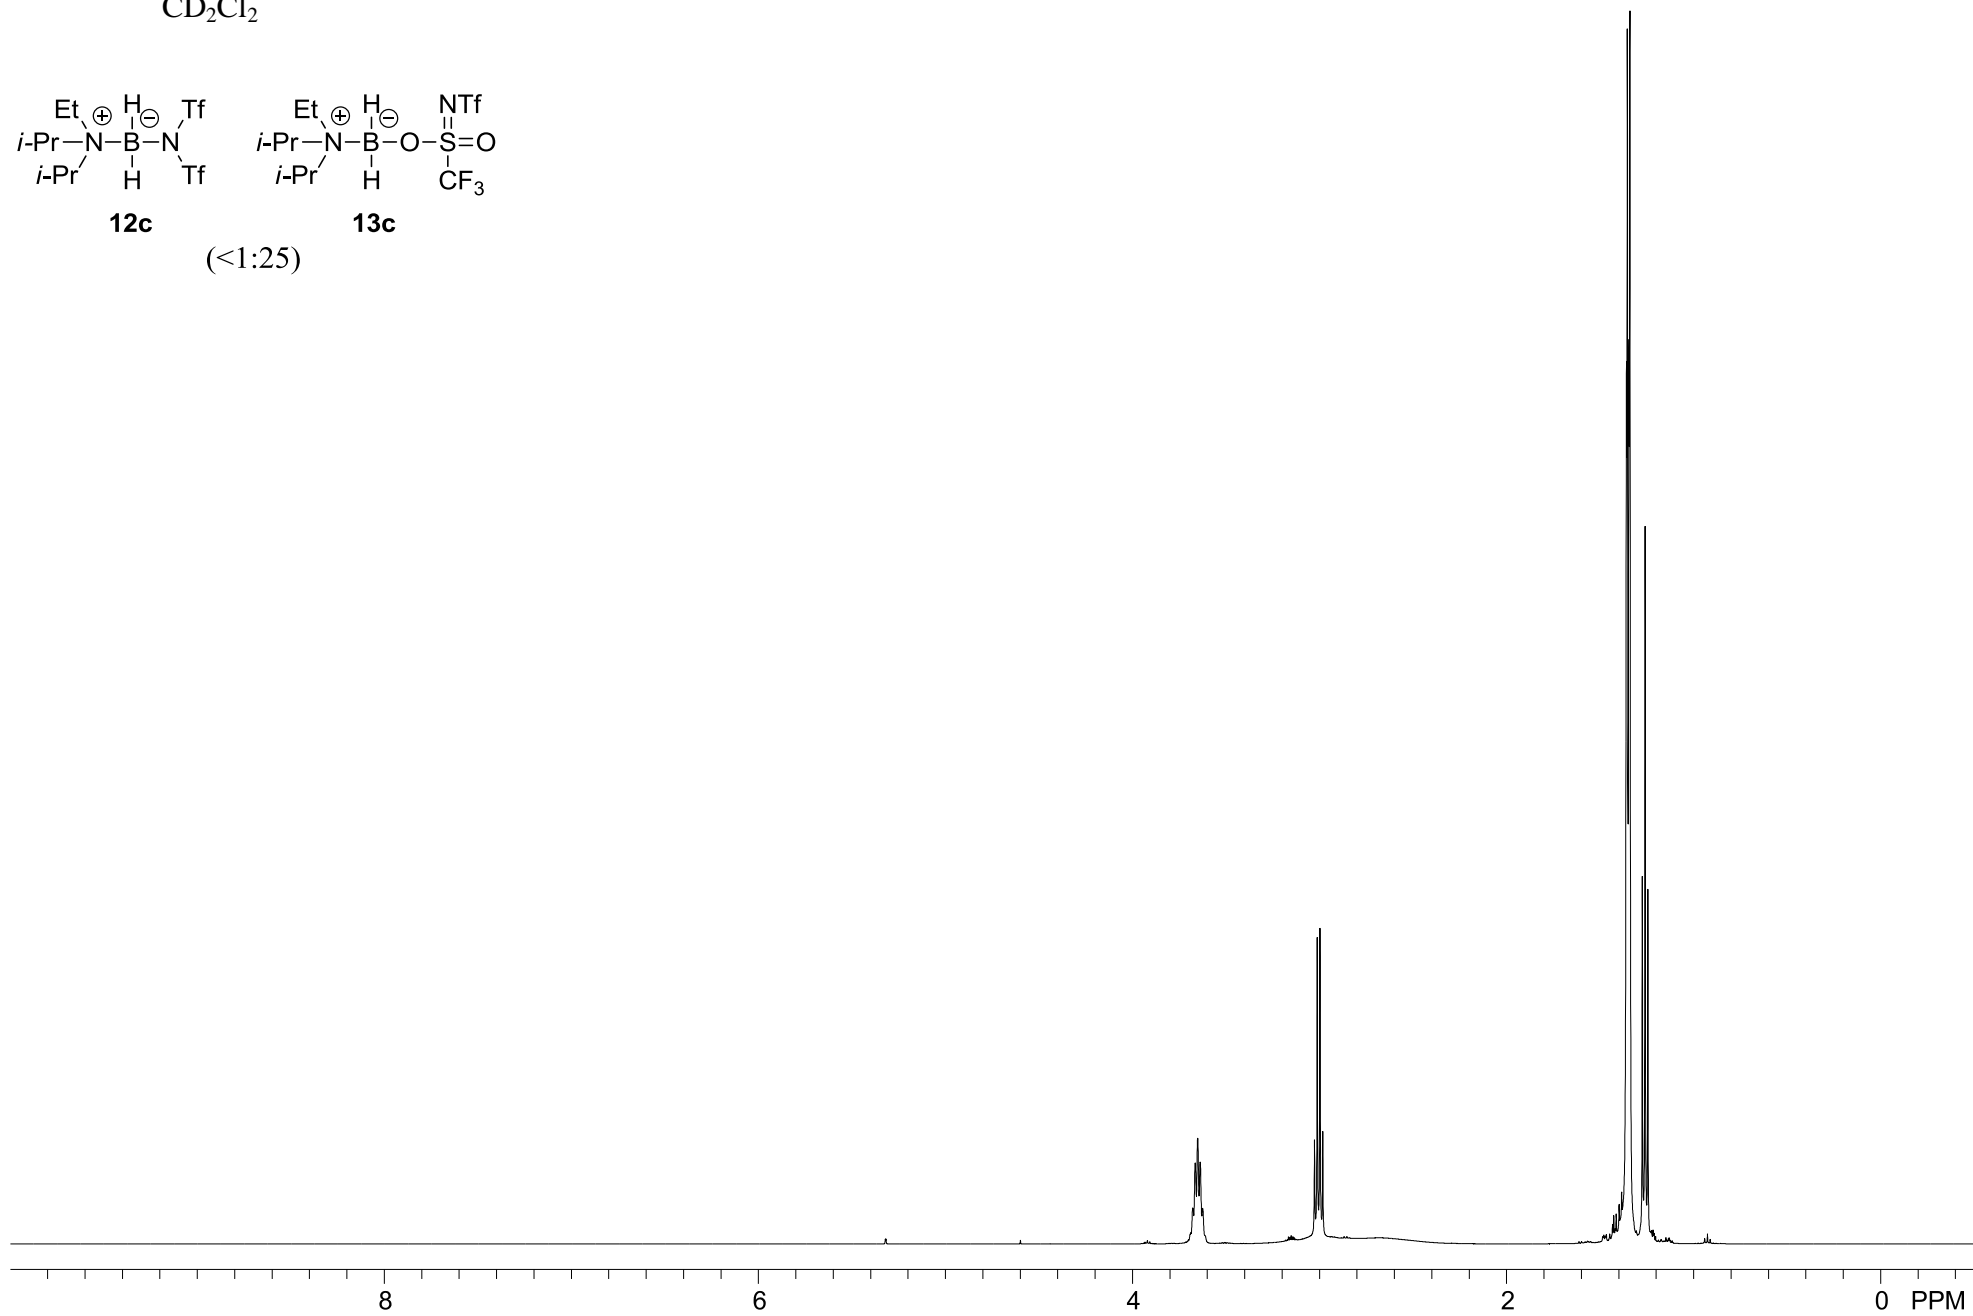

$^{11}\text{B}$  NMR (160 MHz),  
 $\text{CD}_2\text{Cl}_2$

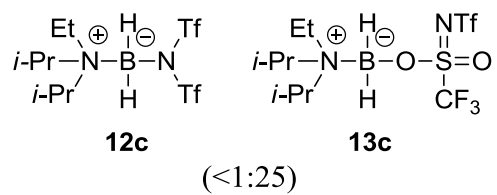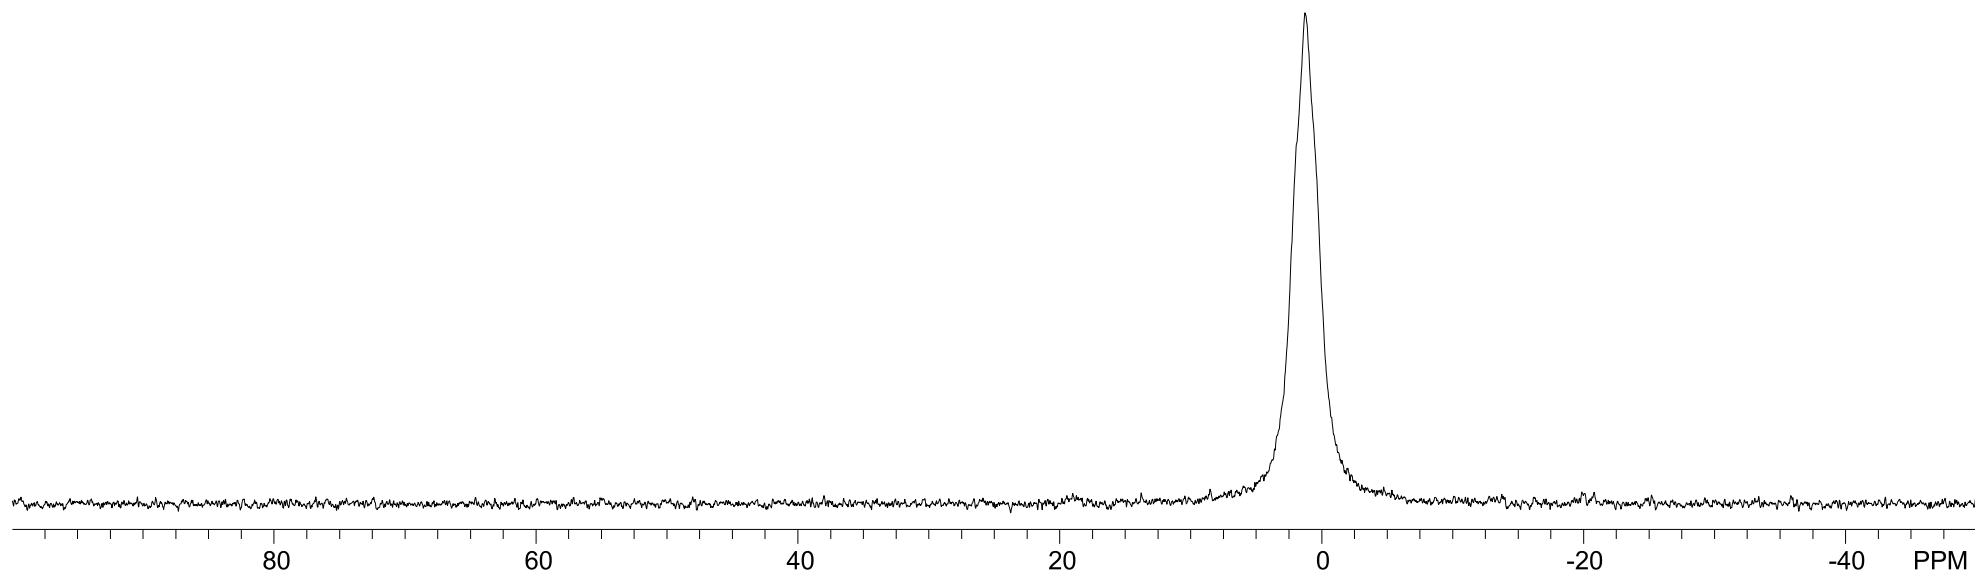

$^{11}\text{B}\{^1\text{H}\}$  NMR (160 MHz),  
 $\text{CD}_2\text{Cl}_2$

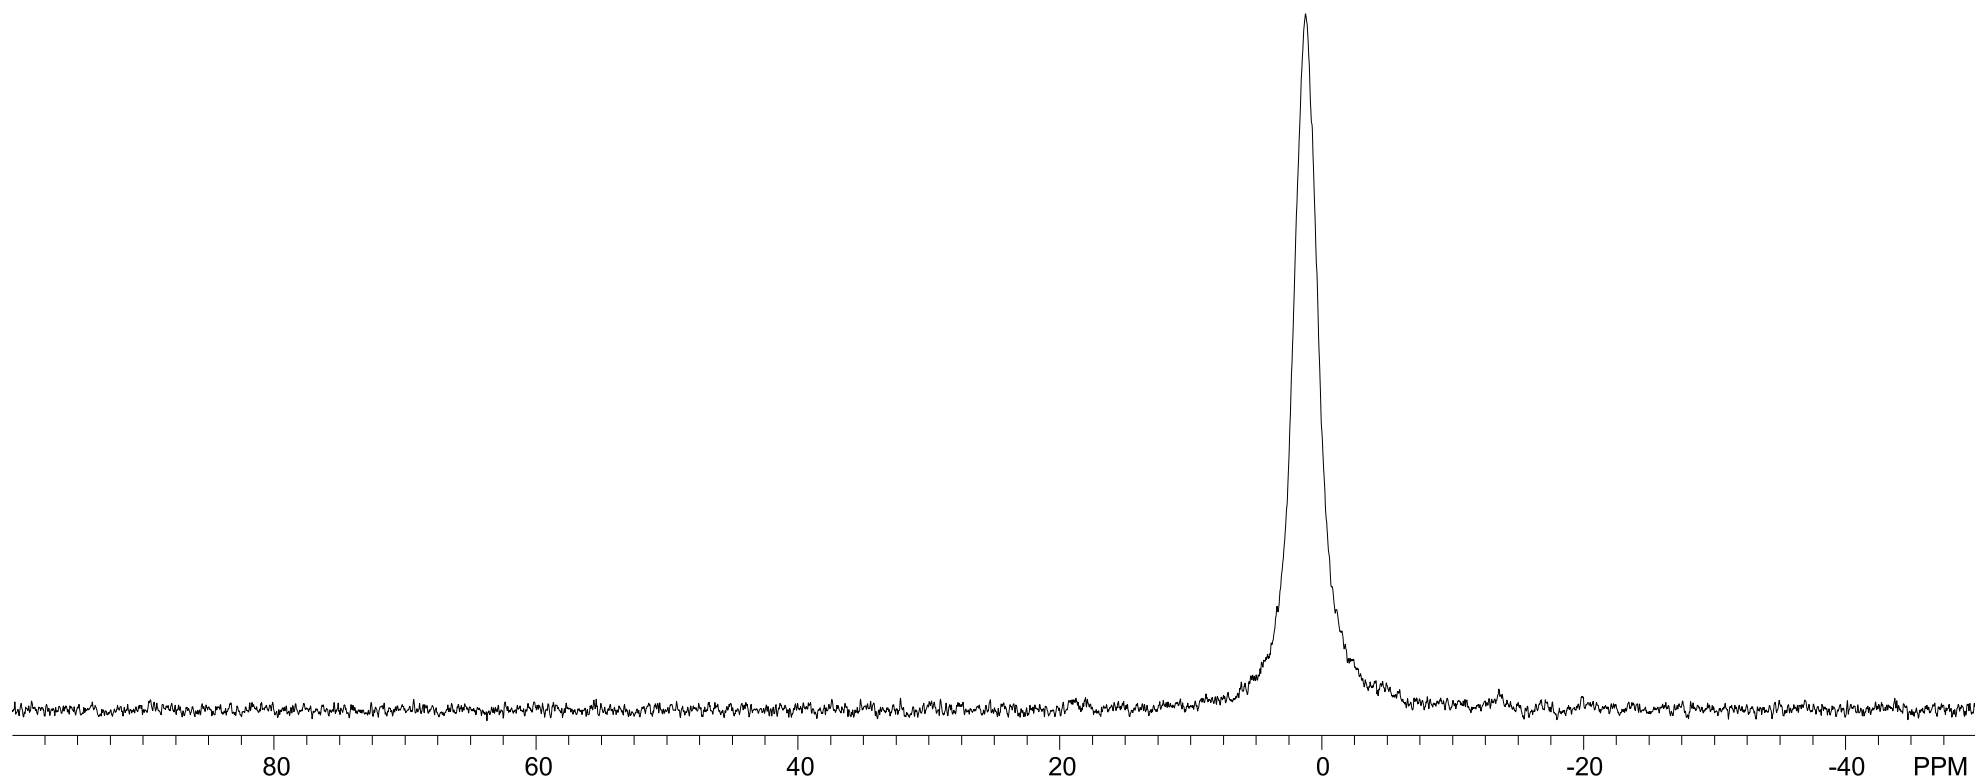

$^{13}\text{C}\{^1\text{H}\}$  NMR (126 MHz),  
 $\text{CD}_2\text{Cl}_2$

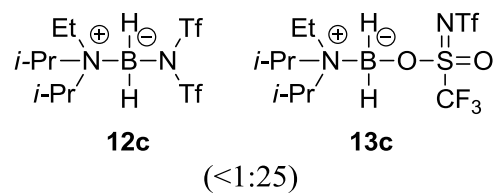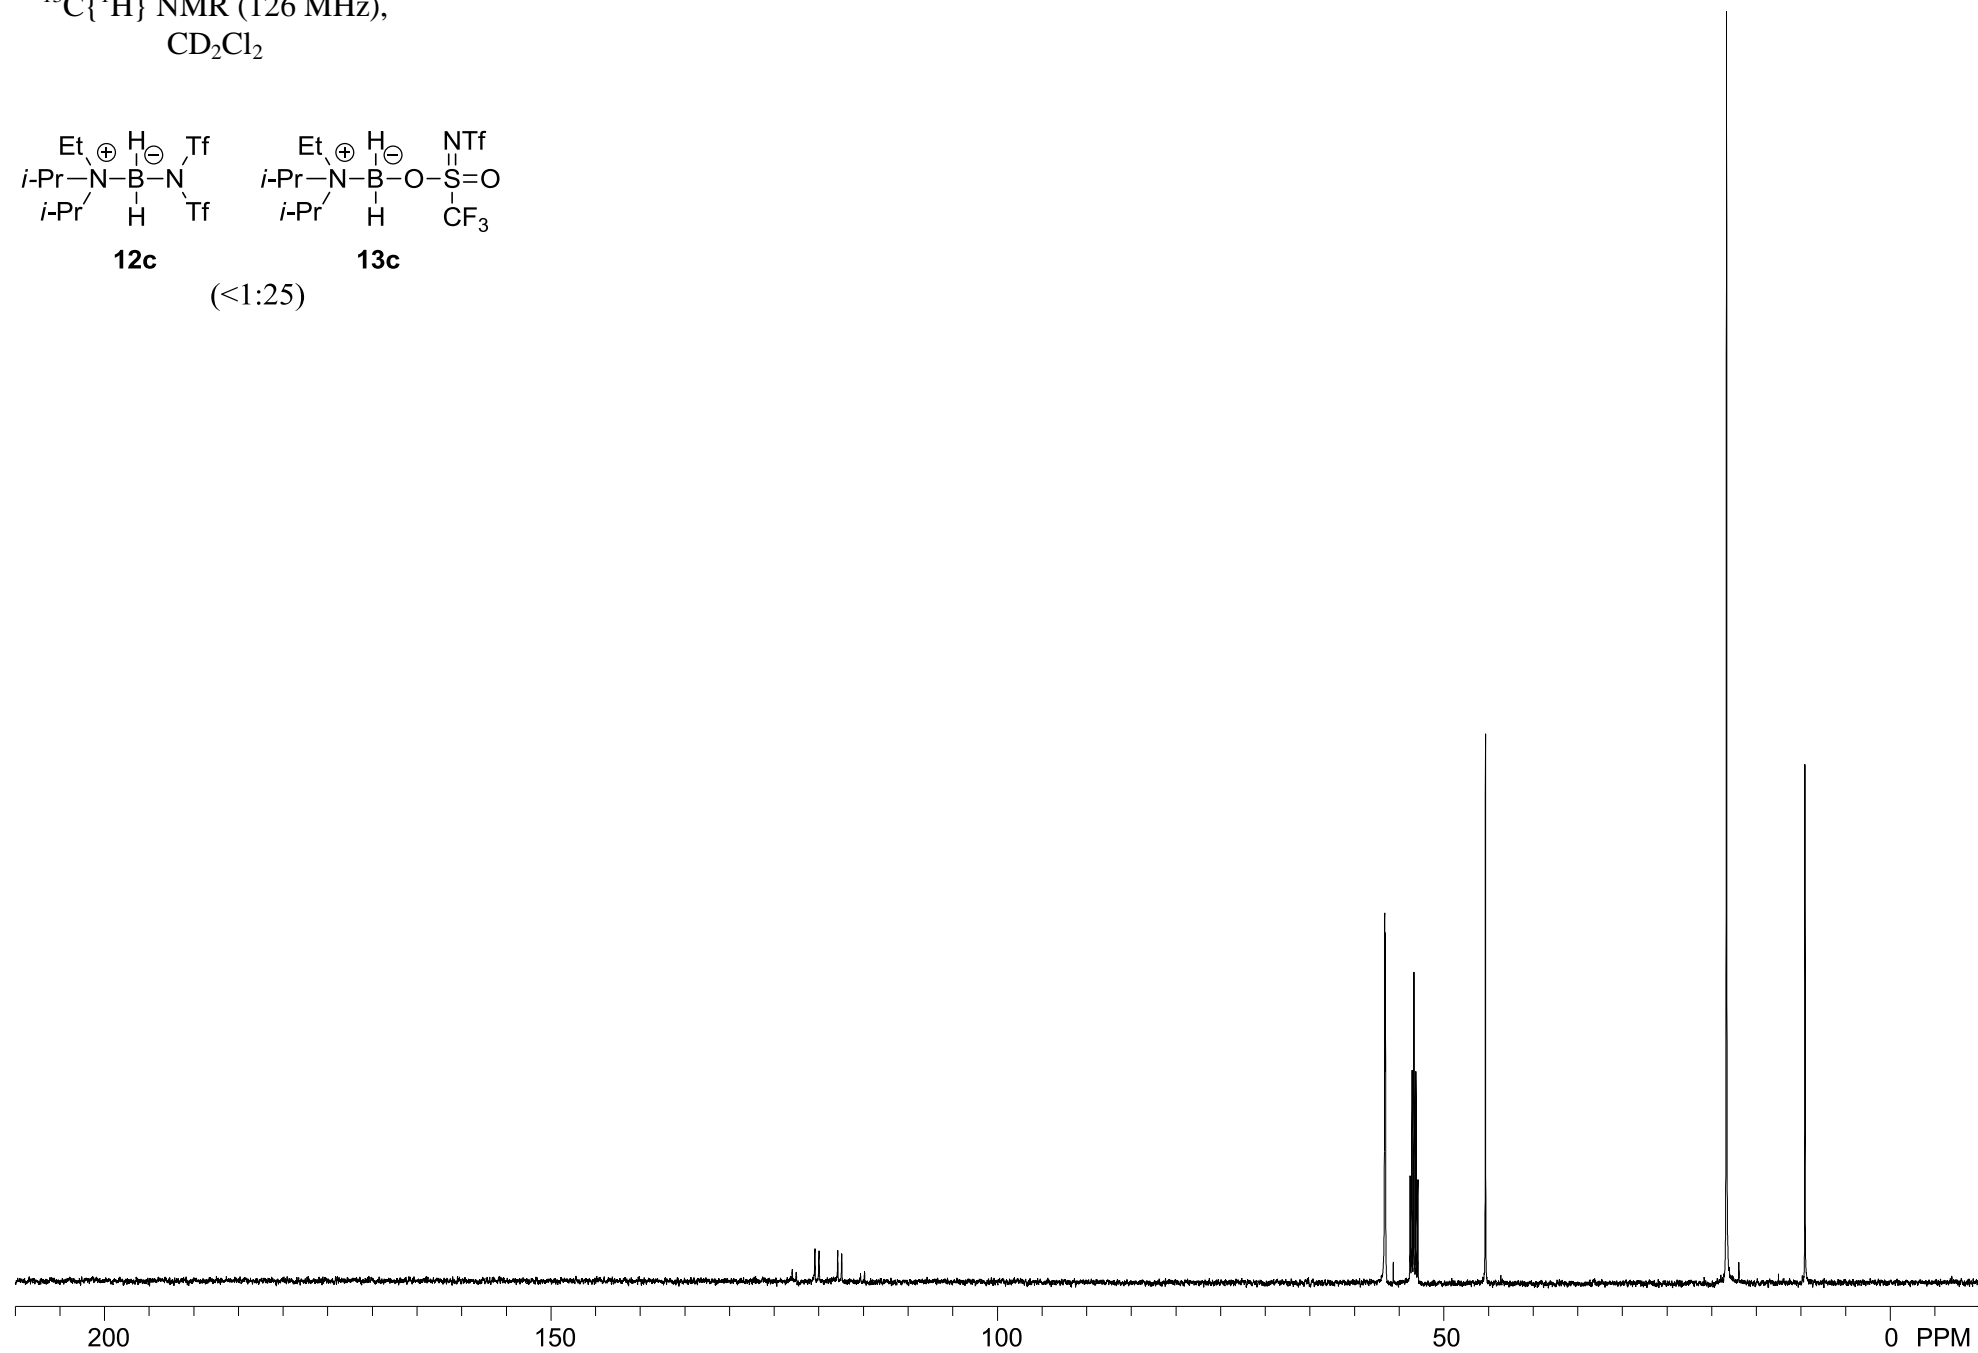

$^{19}\text{F}$  NMR (471 MHz),  
 $\text{CD}_2\text{Cl}_2$

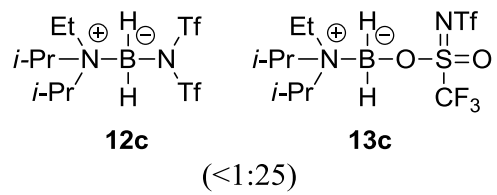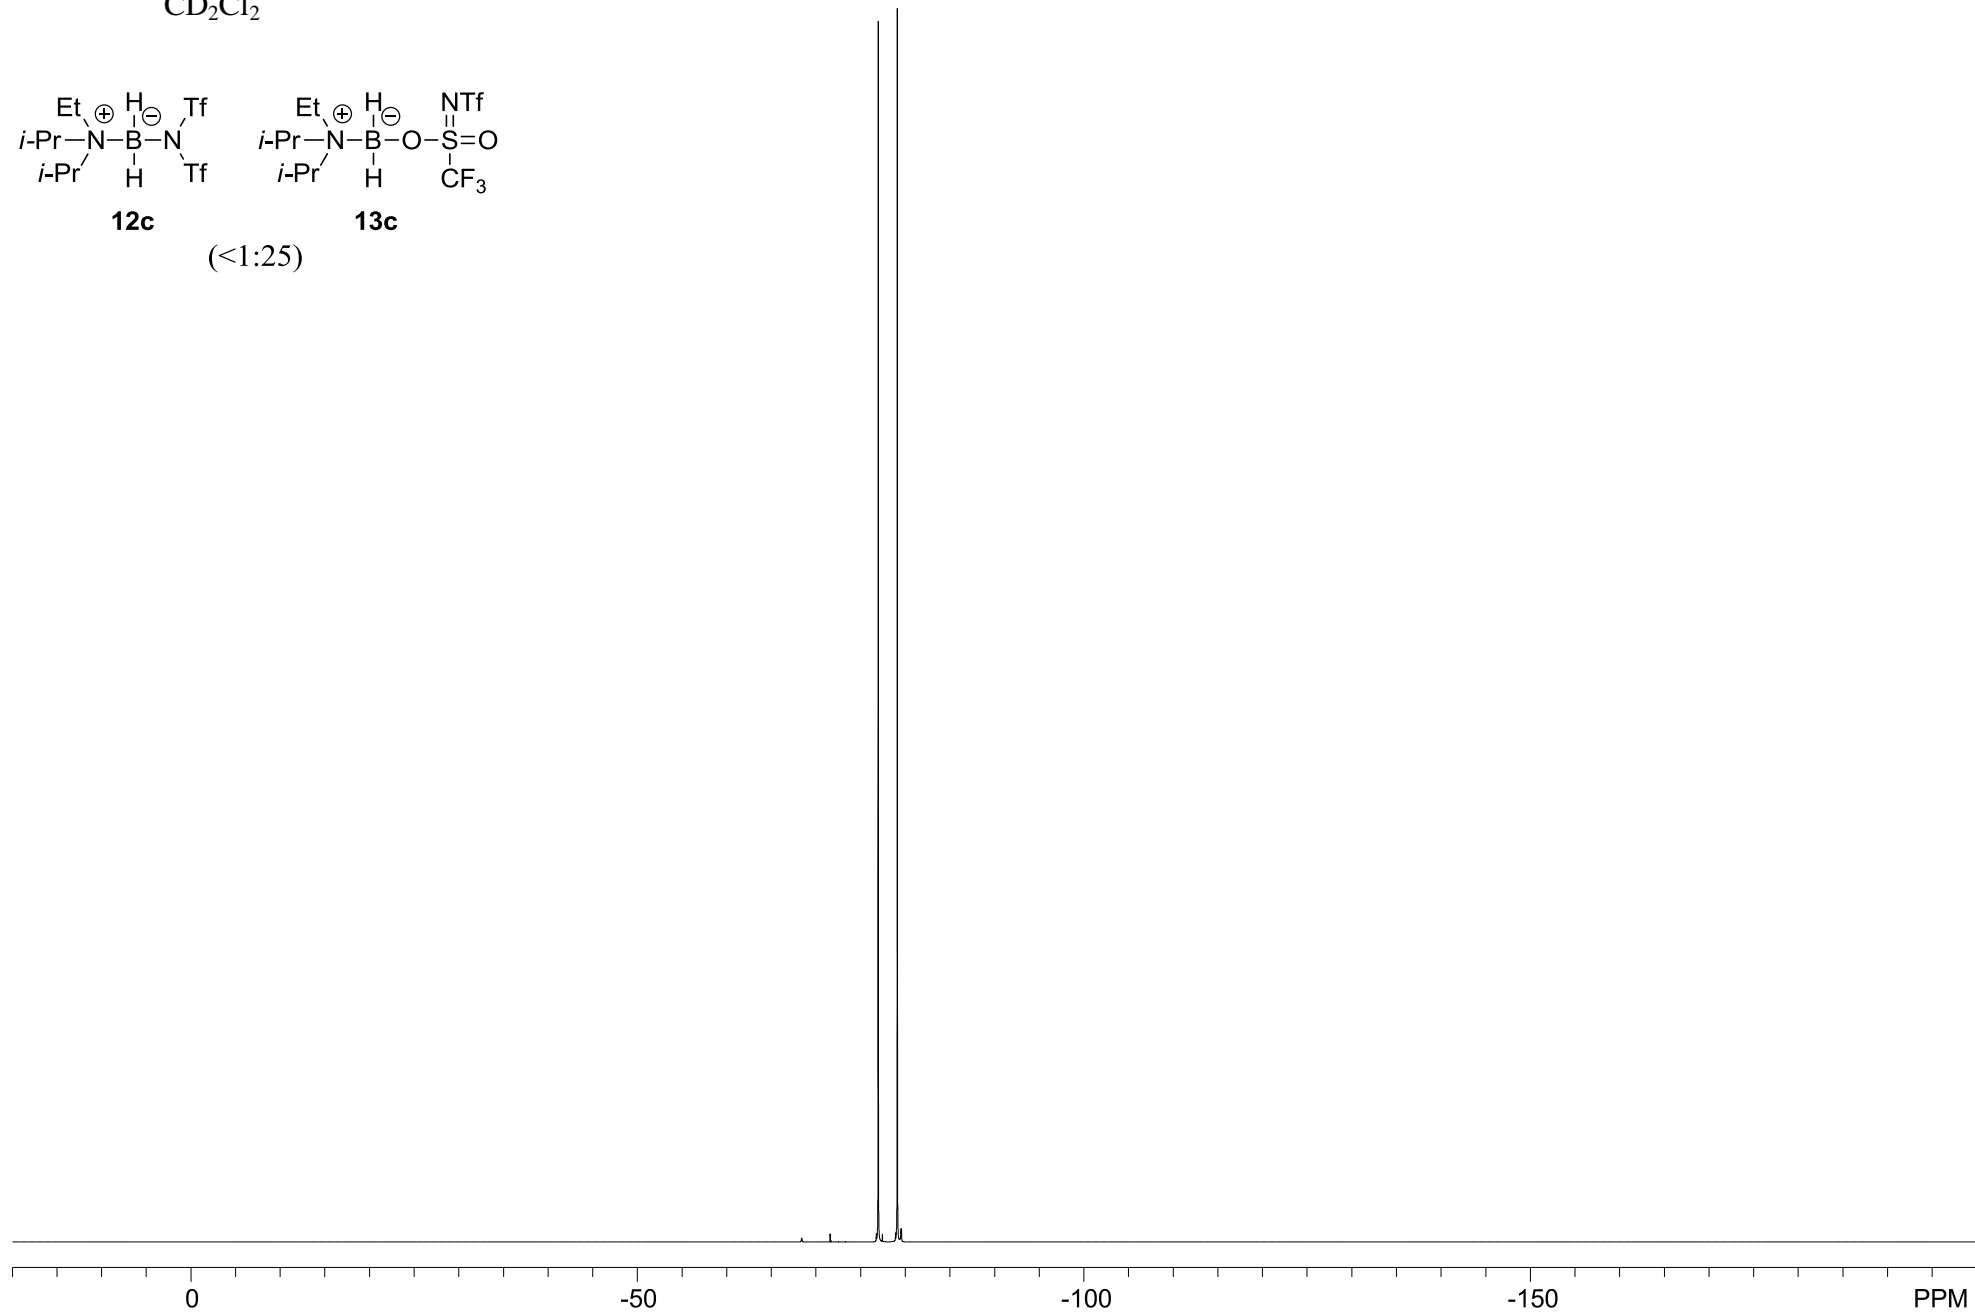

$^1\text{H}$  NMR (500 MHz),  
 $\text{CD}_2\text{Cl}_2$

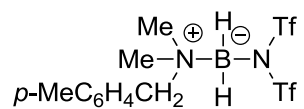

**12d**

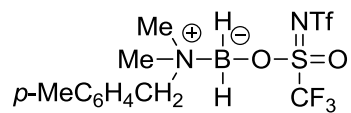

**13d**

(4.2:1 **12d**:**13d**)

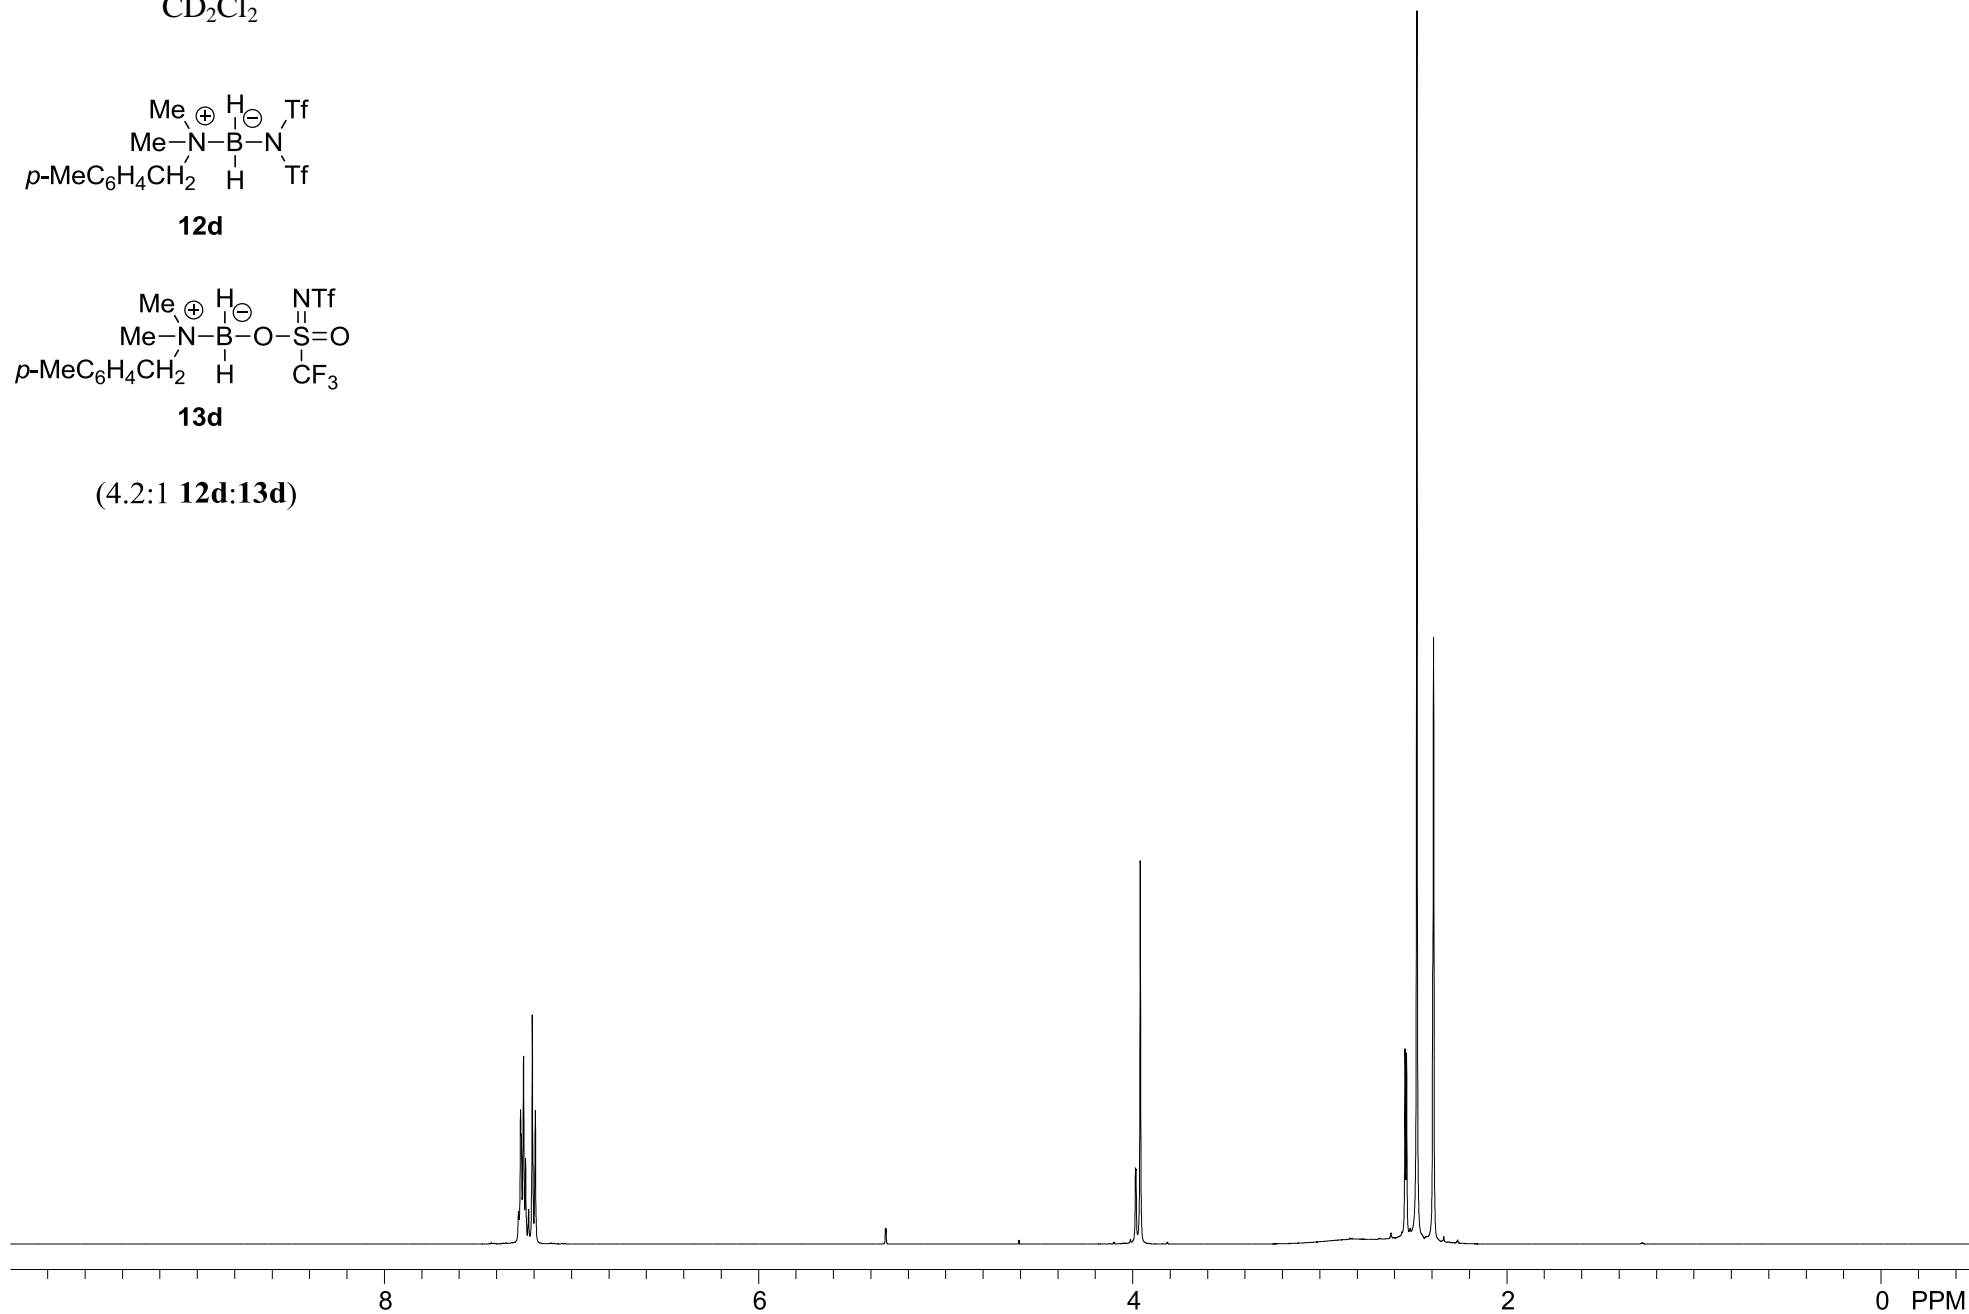

$^{11}\text{B}$  NMR (160 MHz),  
 $\text{CD}_2\text{Cl}_2$

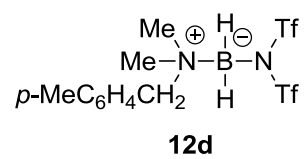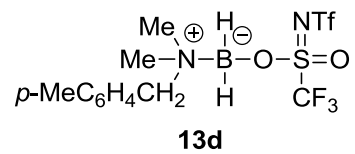

(4.2:1 **12d**:**13d**)

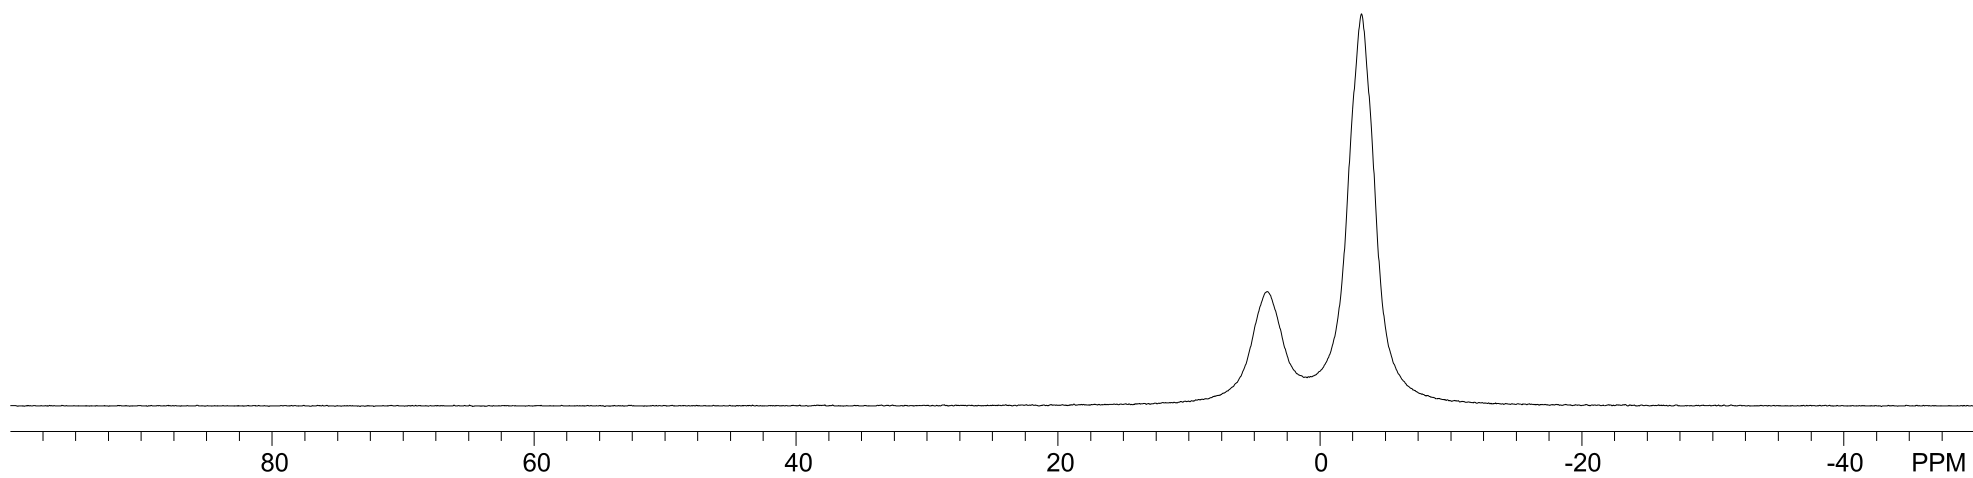



$^{11}\text{B}\{^1\text{H}\}$  NMR (160 MHz),  
 $\text{CD}_2\text{Cl}_2$

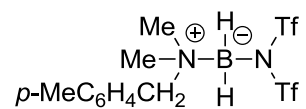

**12d**

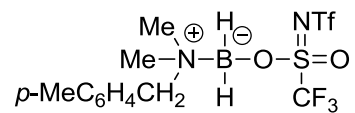

**13d**

(4.2:1 **12d**:**13d**)

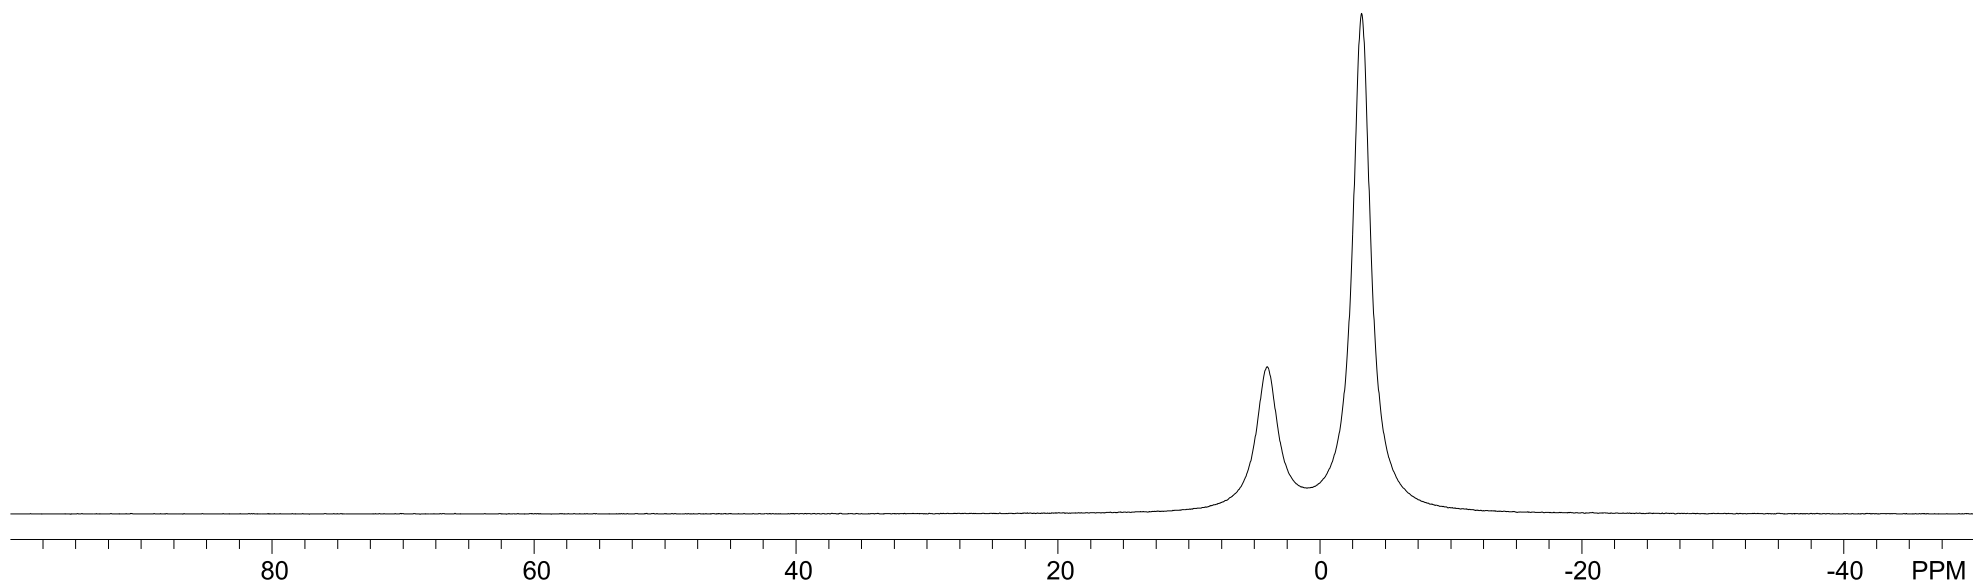

$^{13}\text{C}\{^1\text{H}\}$  NMR (126 MHz),  
 $\text{CD}_2\text{Cl}_2$

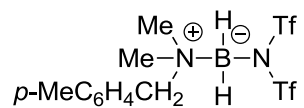

**12d**



**13d**

(4.2:1 **12d**:**13d**)

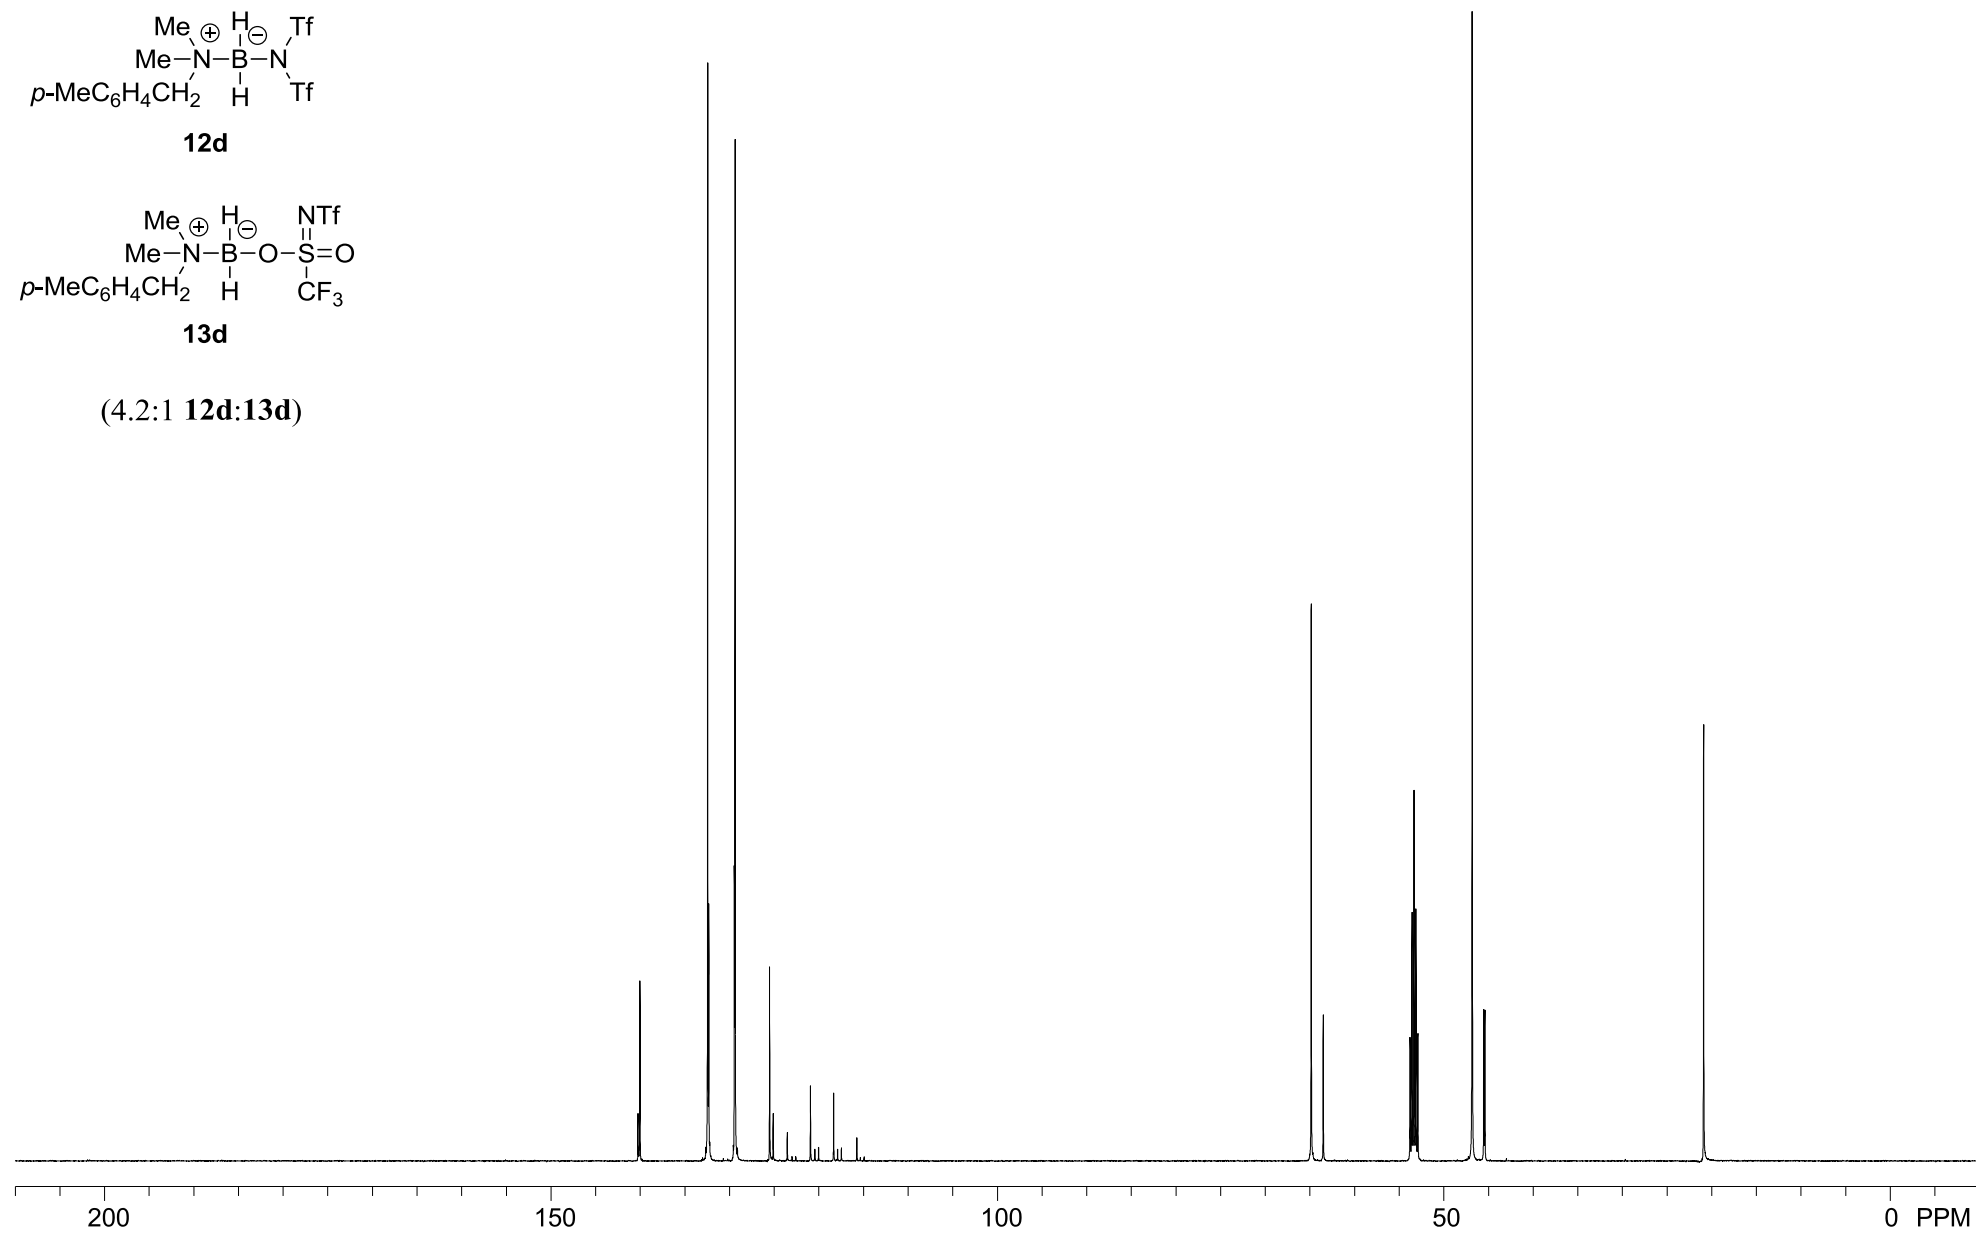

$^{19}\text{F}$  NMR (471 MHz),  
 $\text{CD}_2\text{Cl}_2$

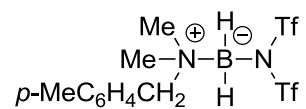

**12d**

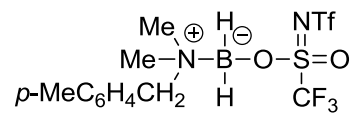

**13d**

(4.2:1 **12d**:**13d**)

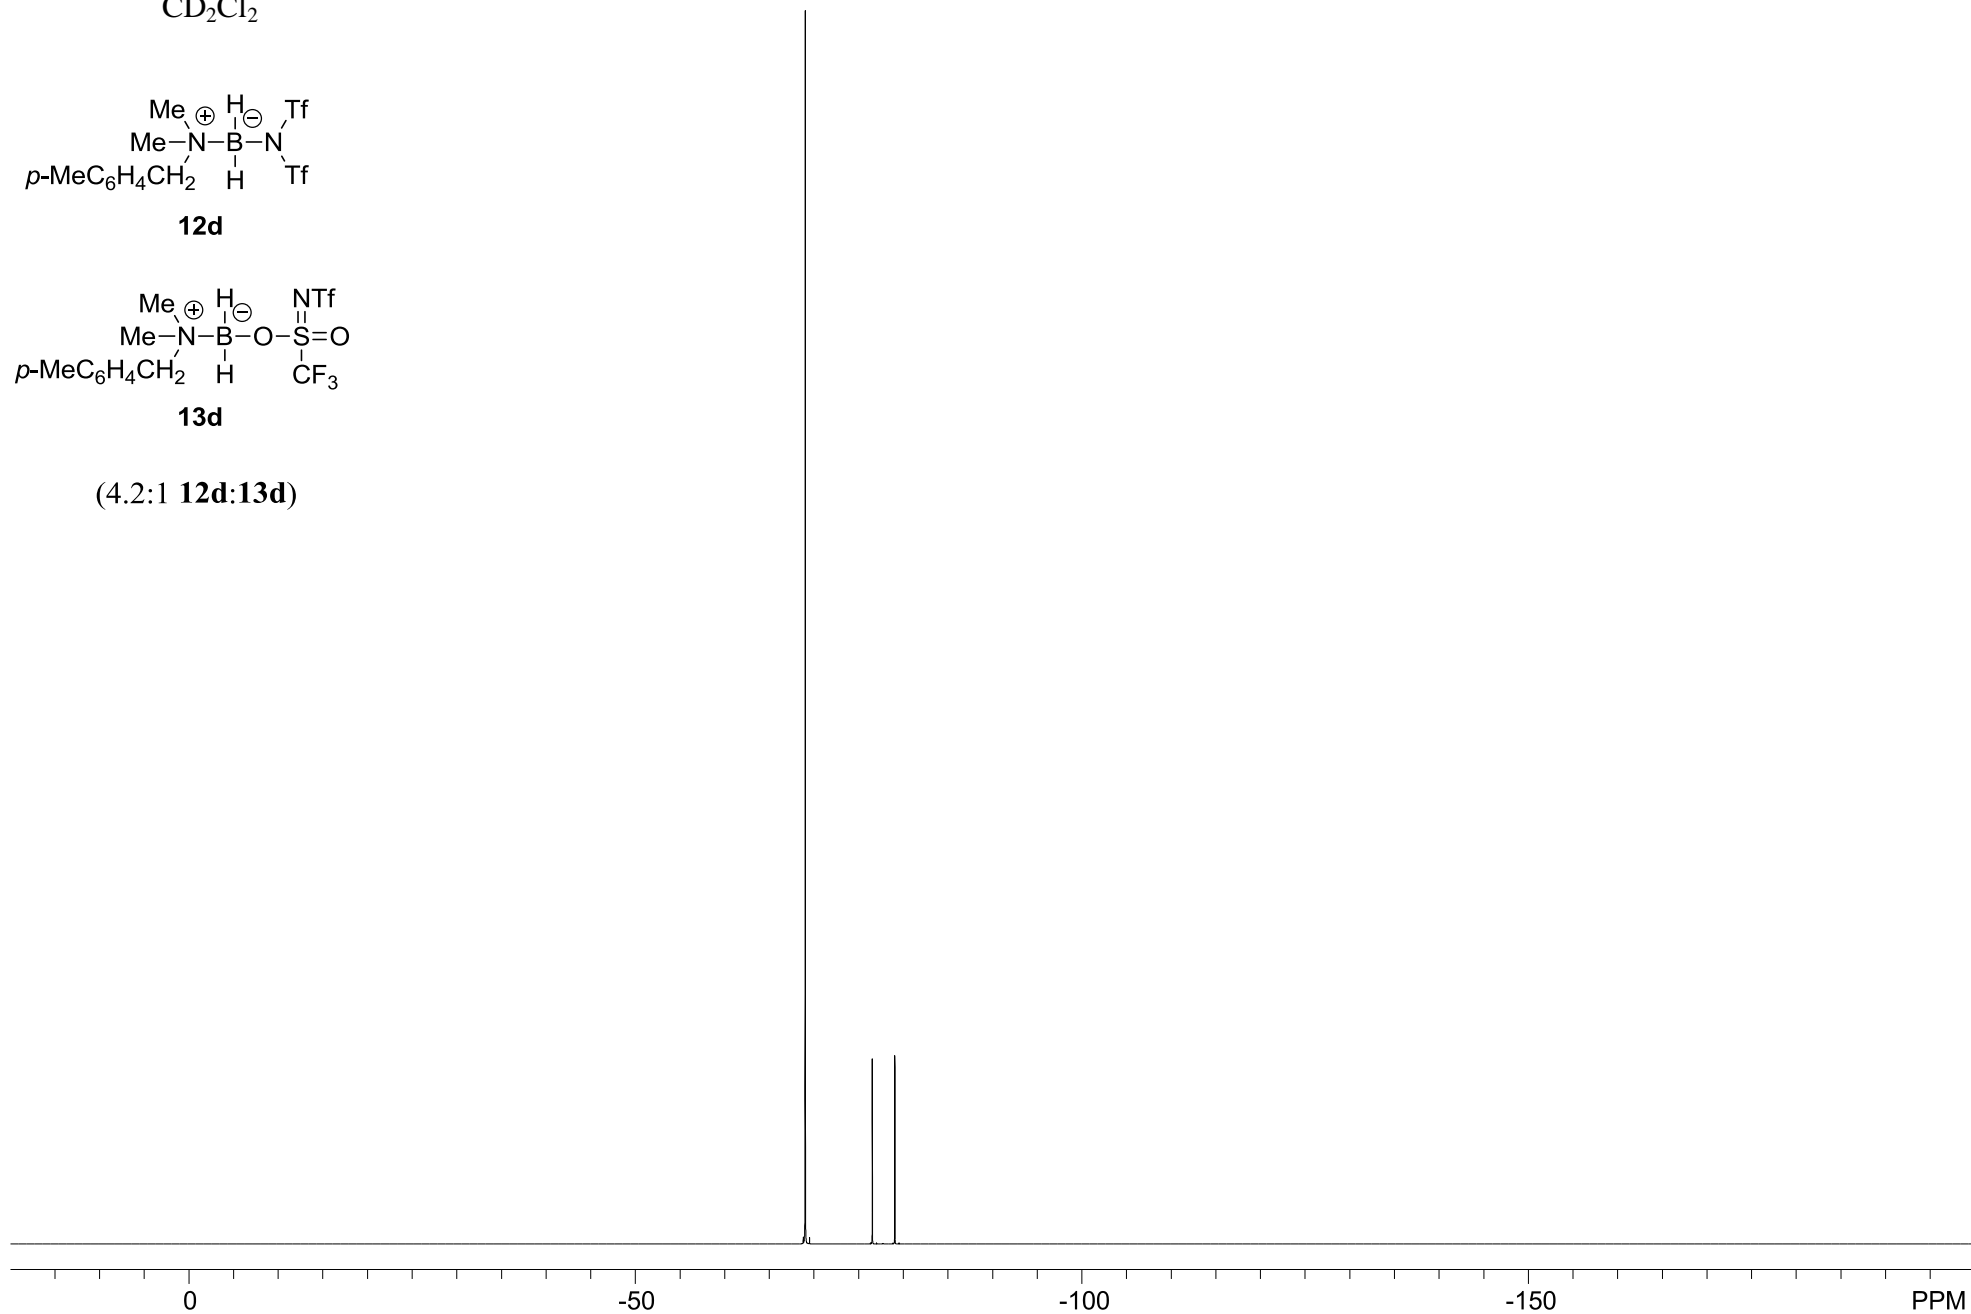

$^1\text{H}$  NMR (700 MHz),  
 $d_8$ -PhMe

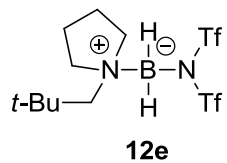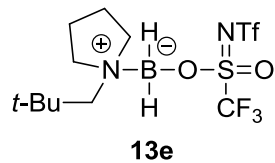

(1:2.6)

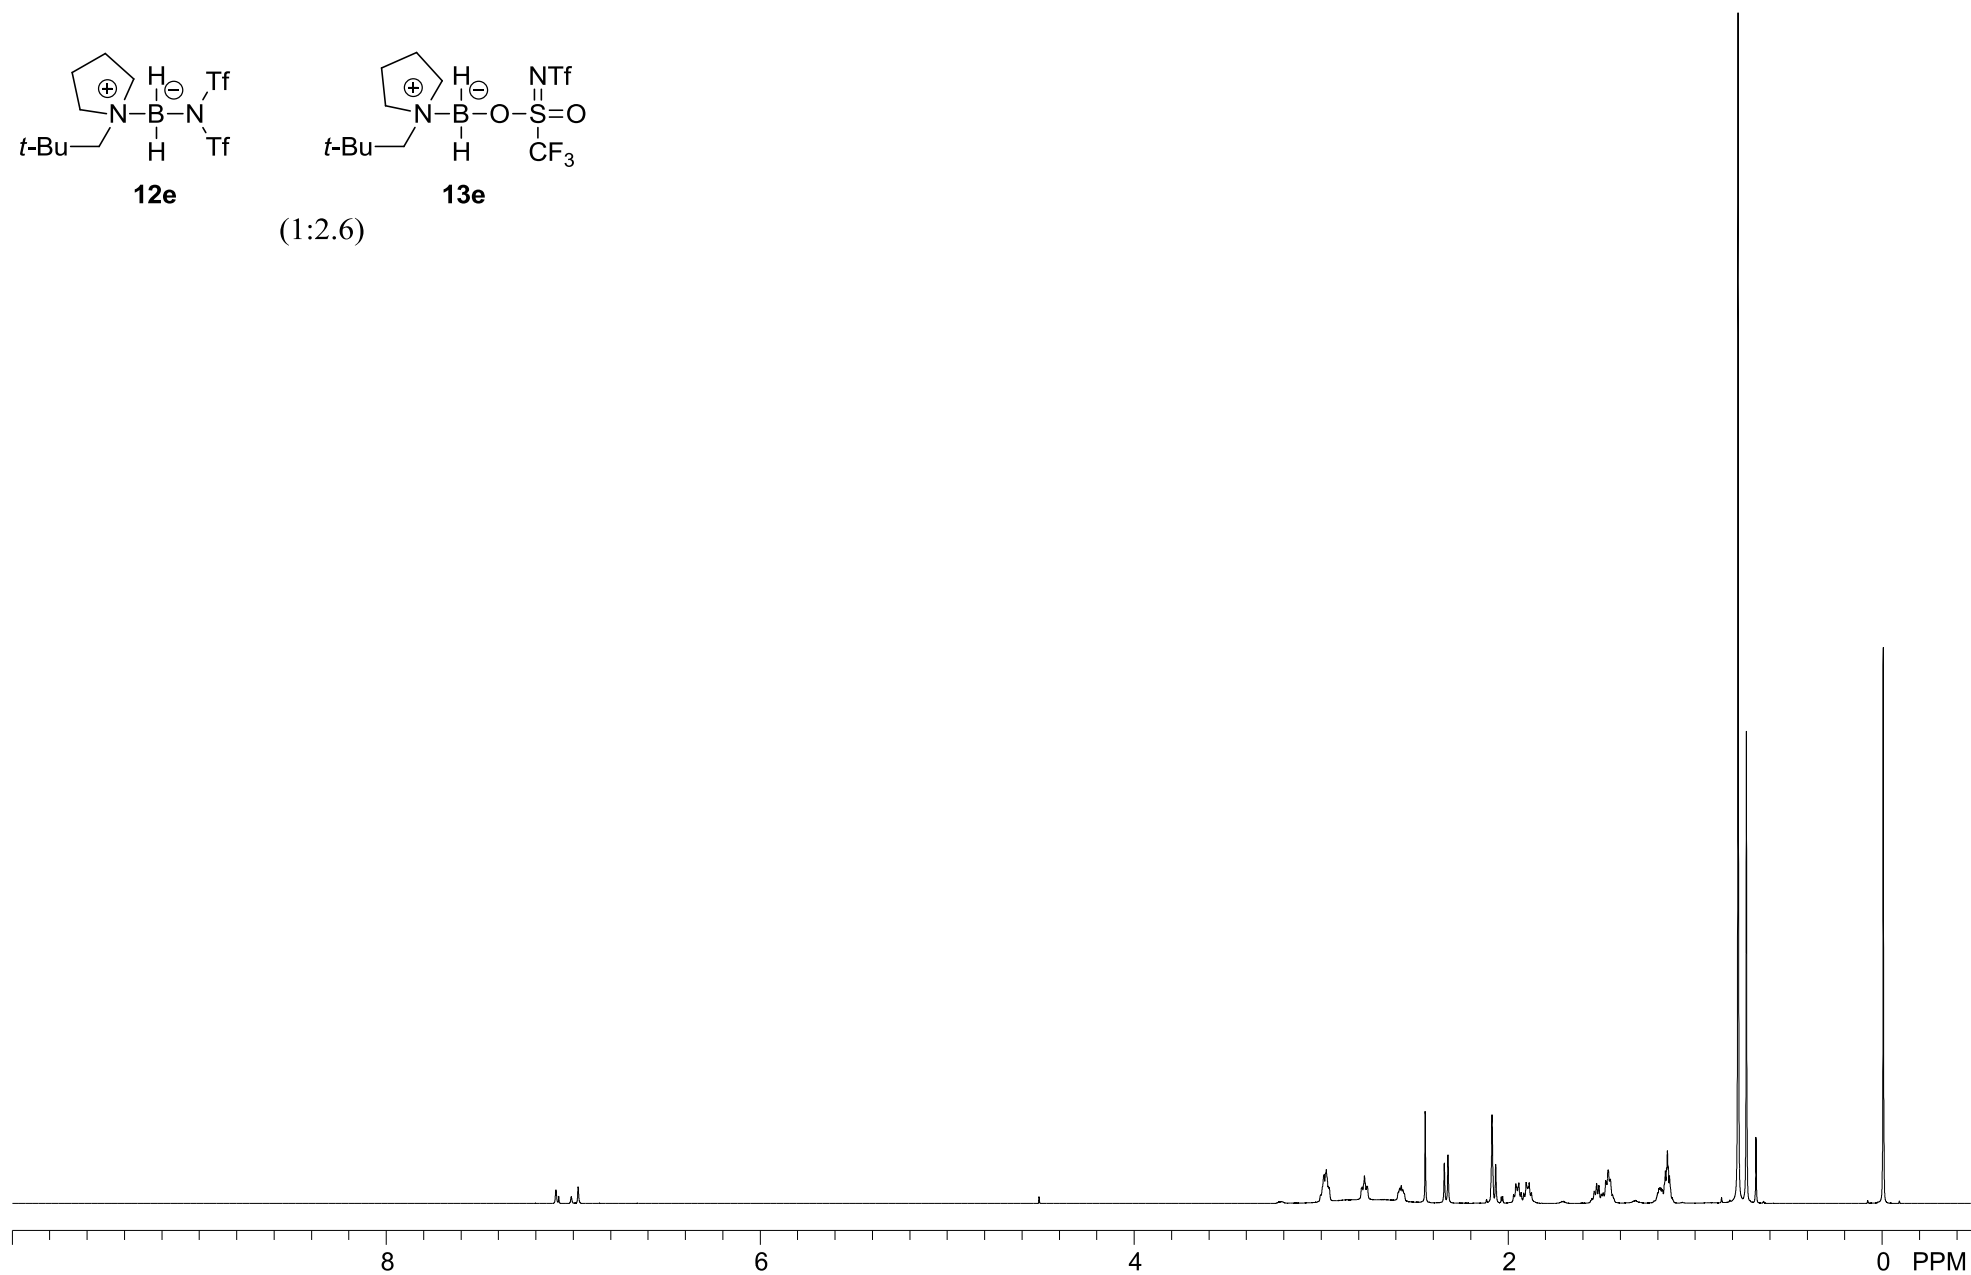

$^{11}\text{B}$  NMR (225 MHz),  
 $d_8\text{-PhMe}$

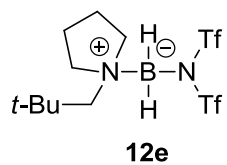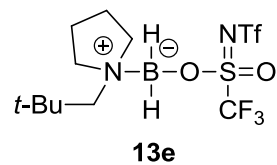

(1:2.6)

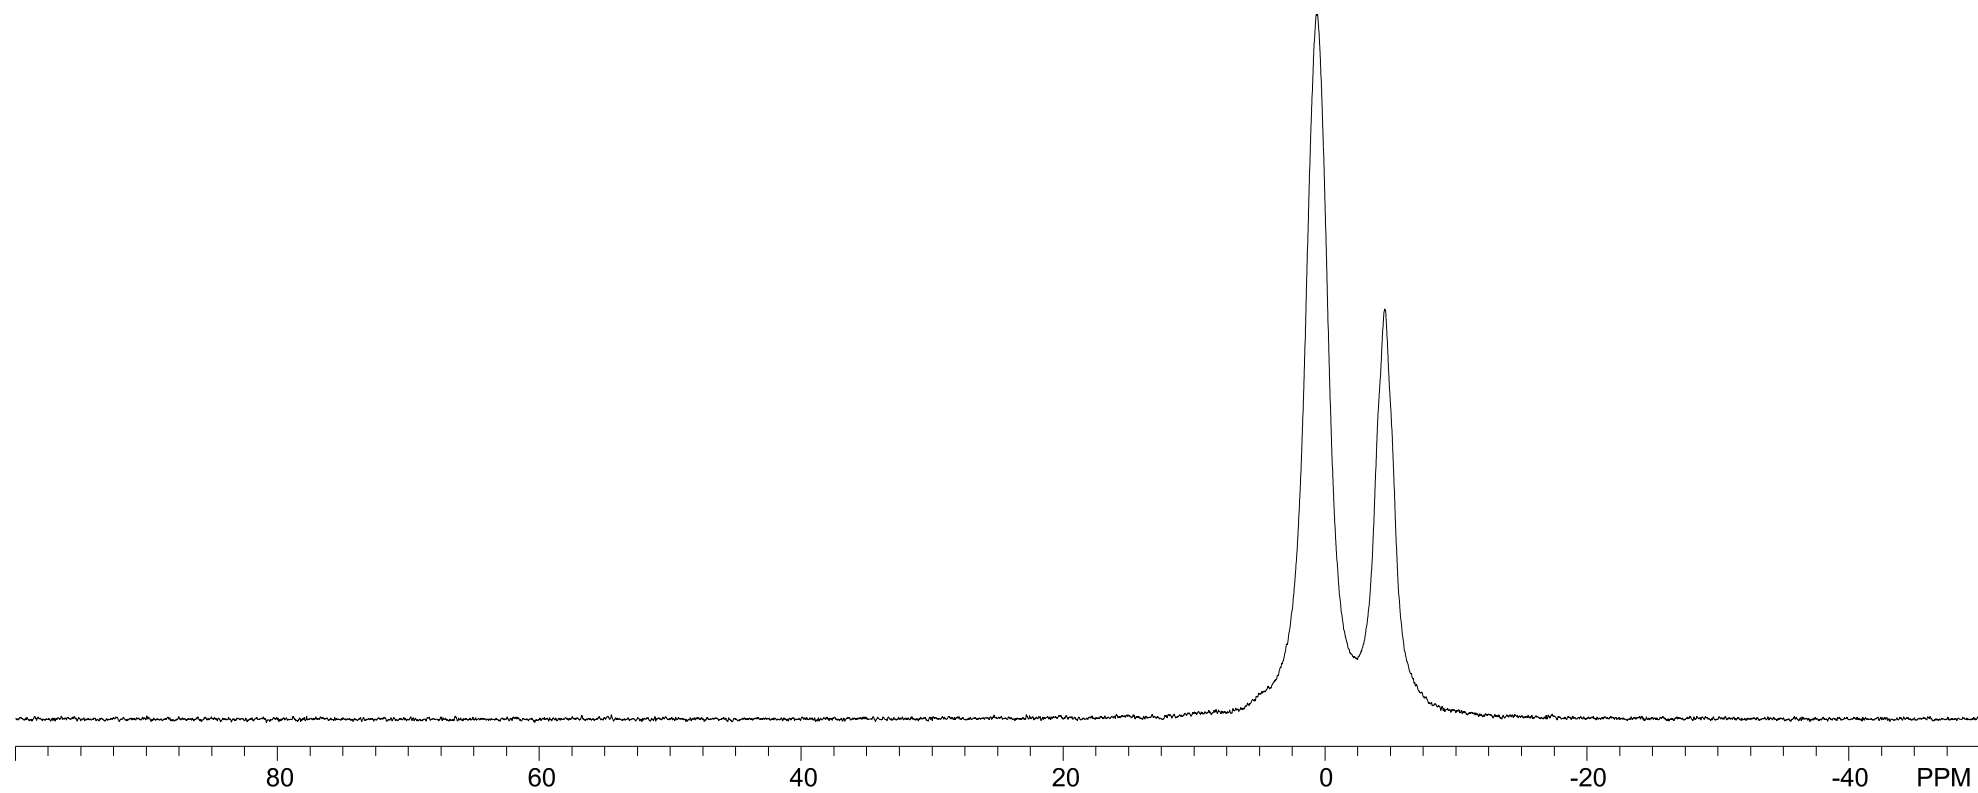

$^{11}\text{B}\{^1\text{H}\}$  NMR (225 MHz),  
 $d_8\text{-PhMe}$

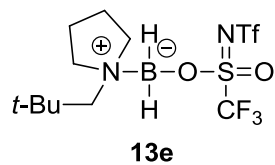

(1:2.6)

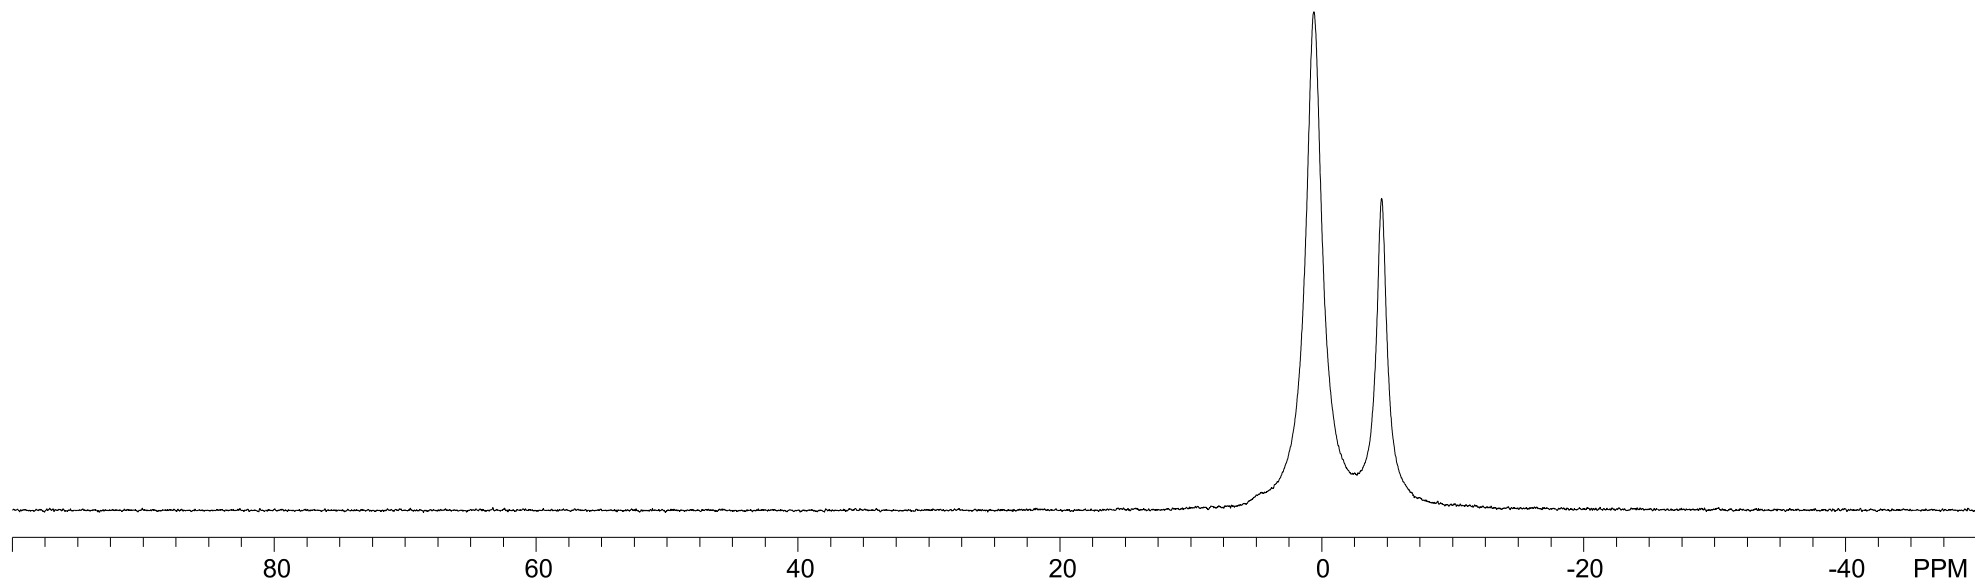

$^{13}\text{C}\{^1\text{H}\}$  NMR (176 MHz),  
 $d_8\text{-PhMe}$

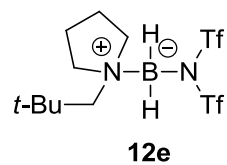

(1:2.6)

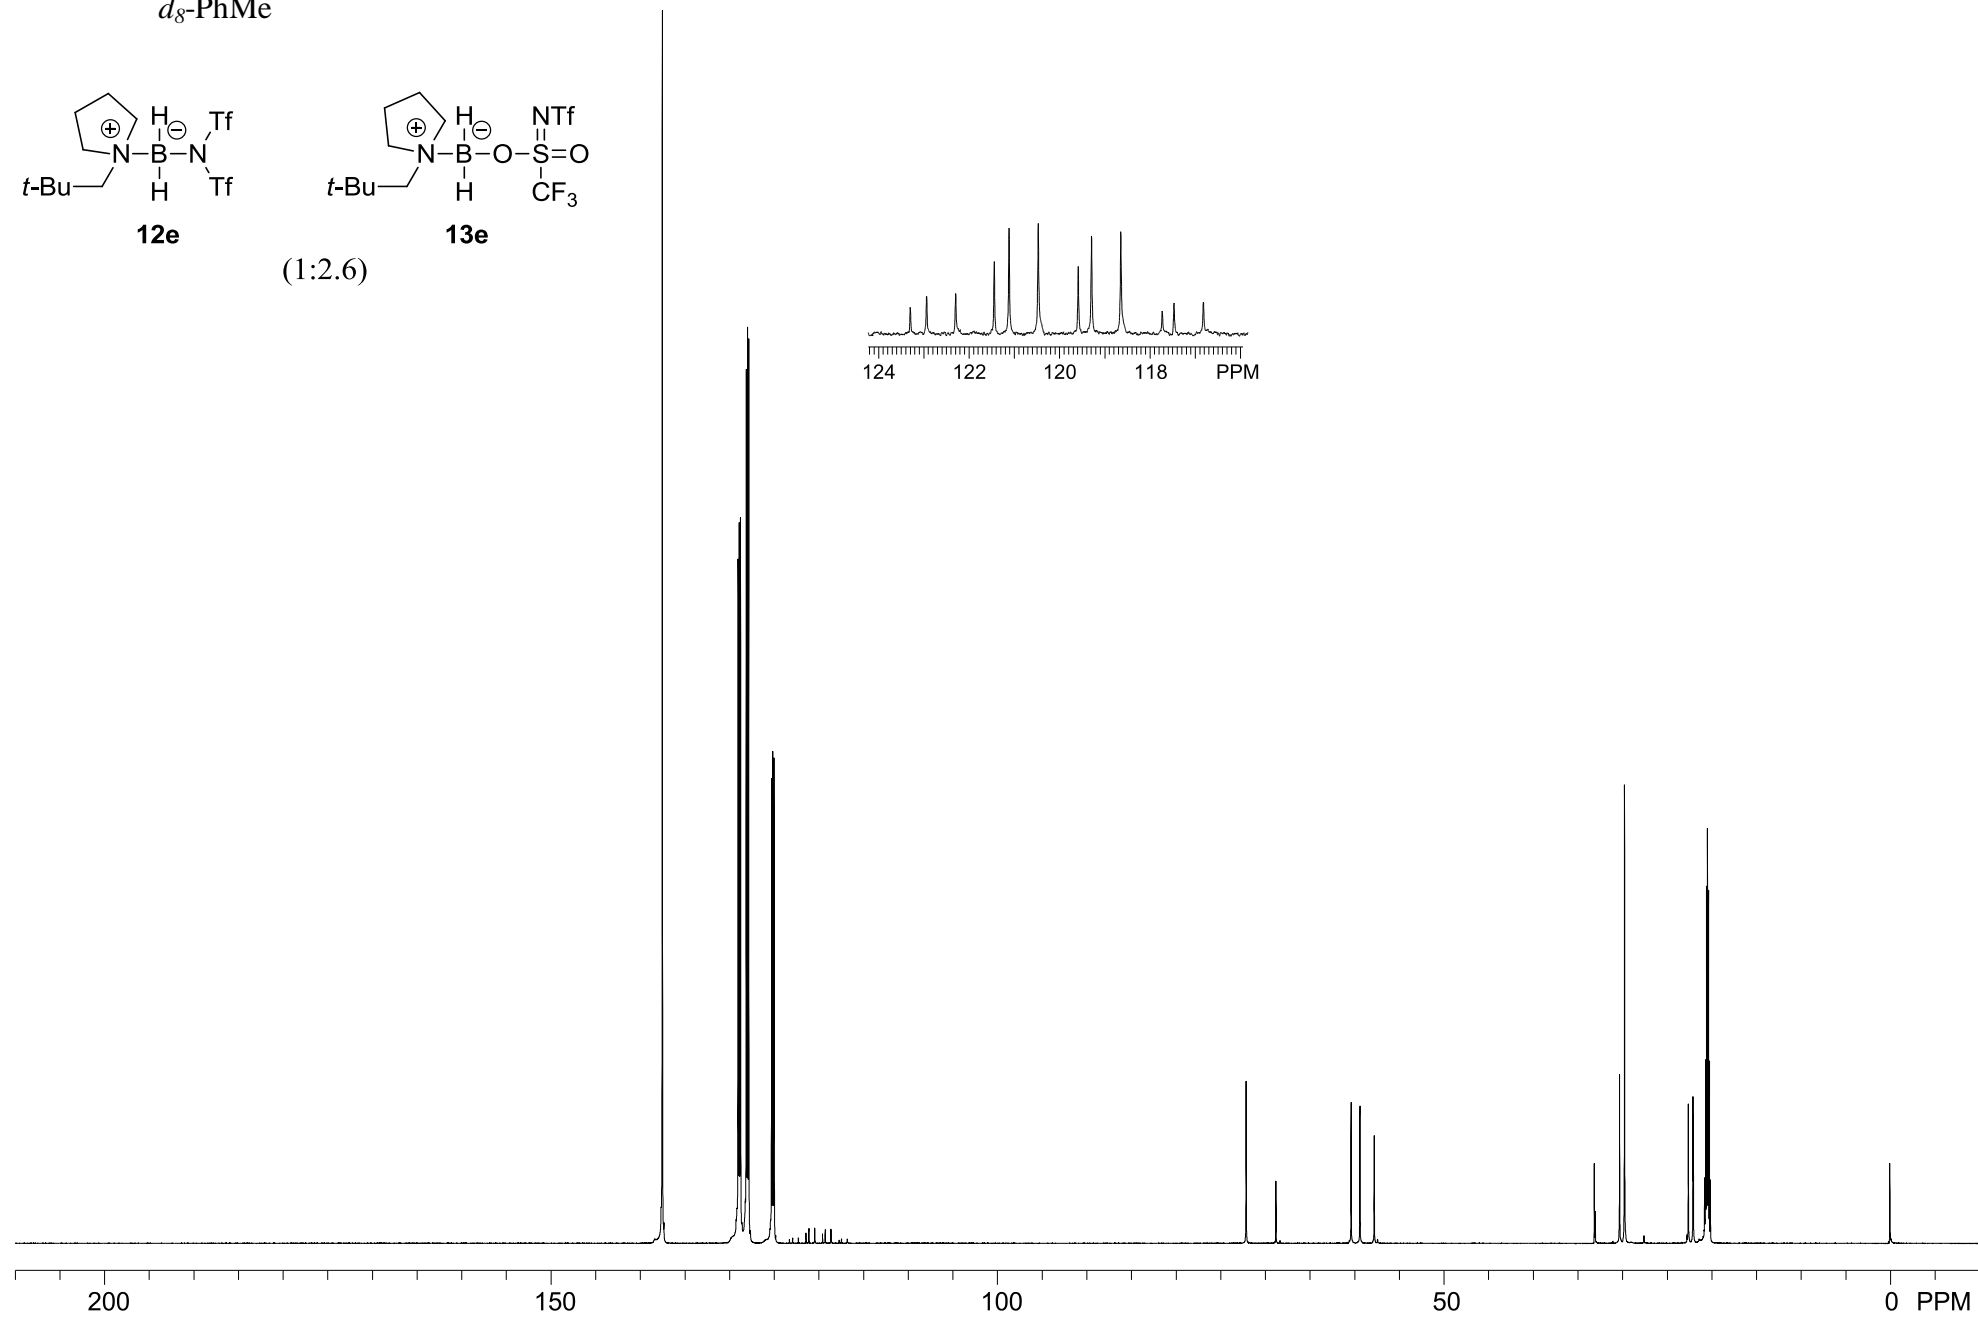

$^{19}\text{F}$  NMR (471 MHz),  
 $d_8$ -PhMe

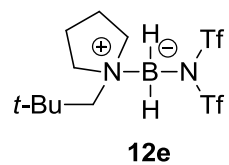

(1:2.6)

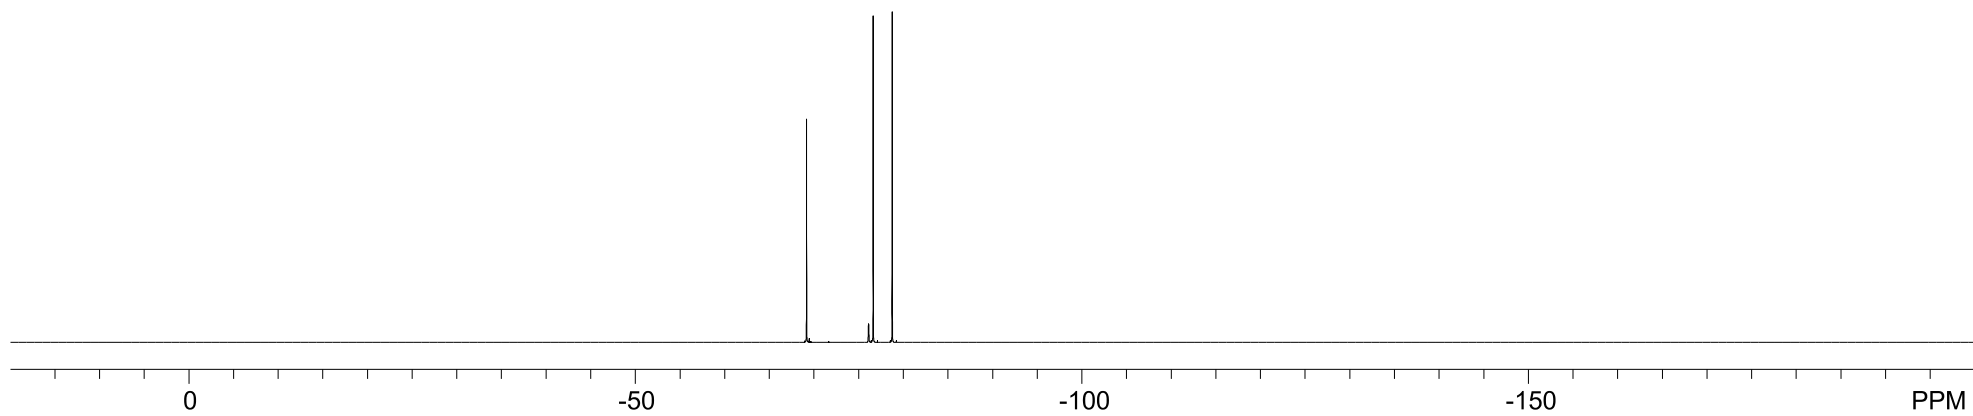



$^1\text{H}$  NMR (500 MHz),  
 $\text{CDCl}_3$

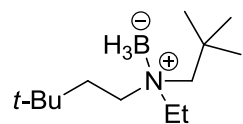

**16**

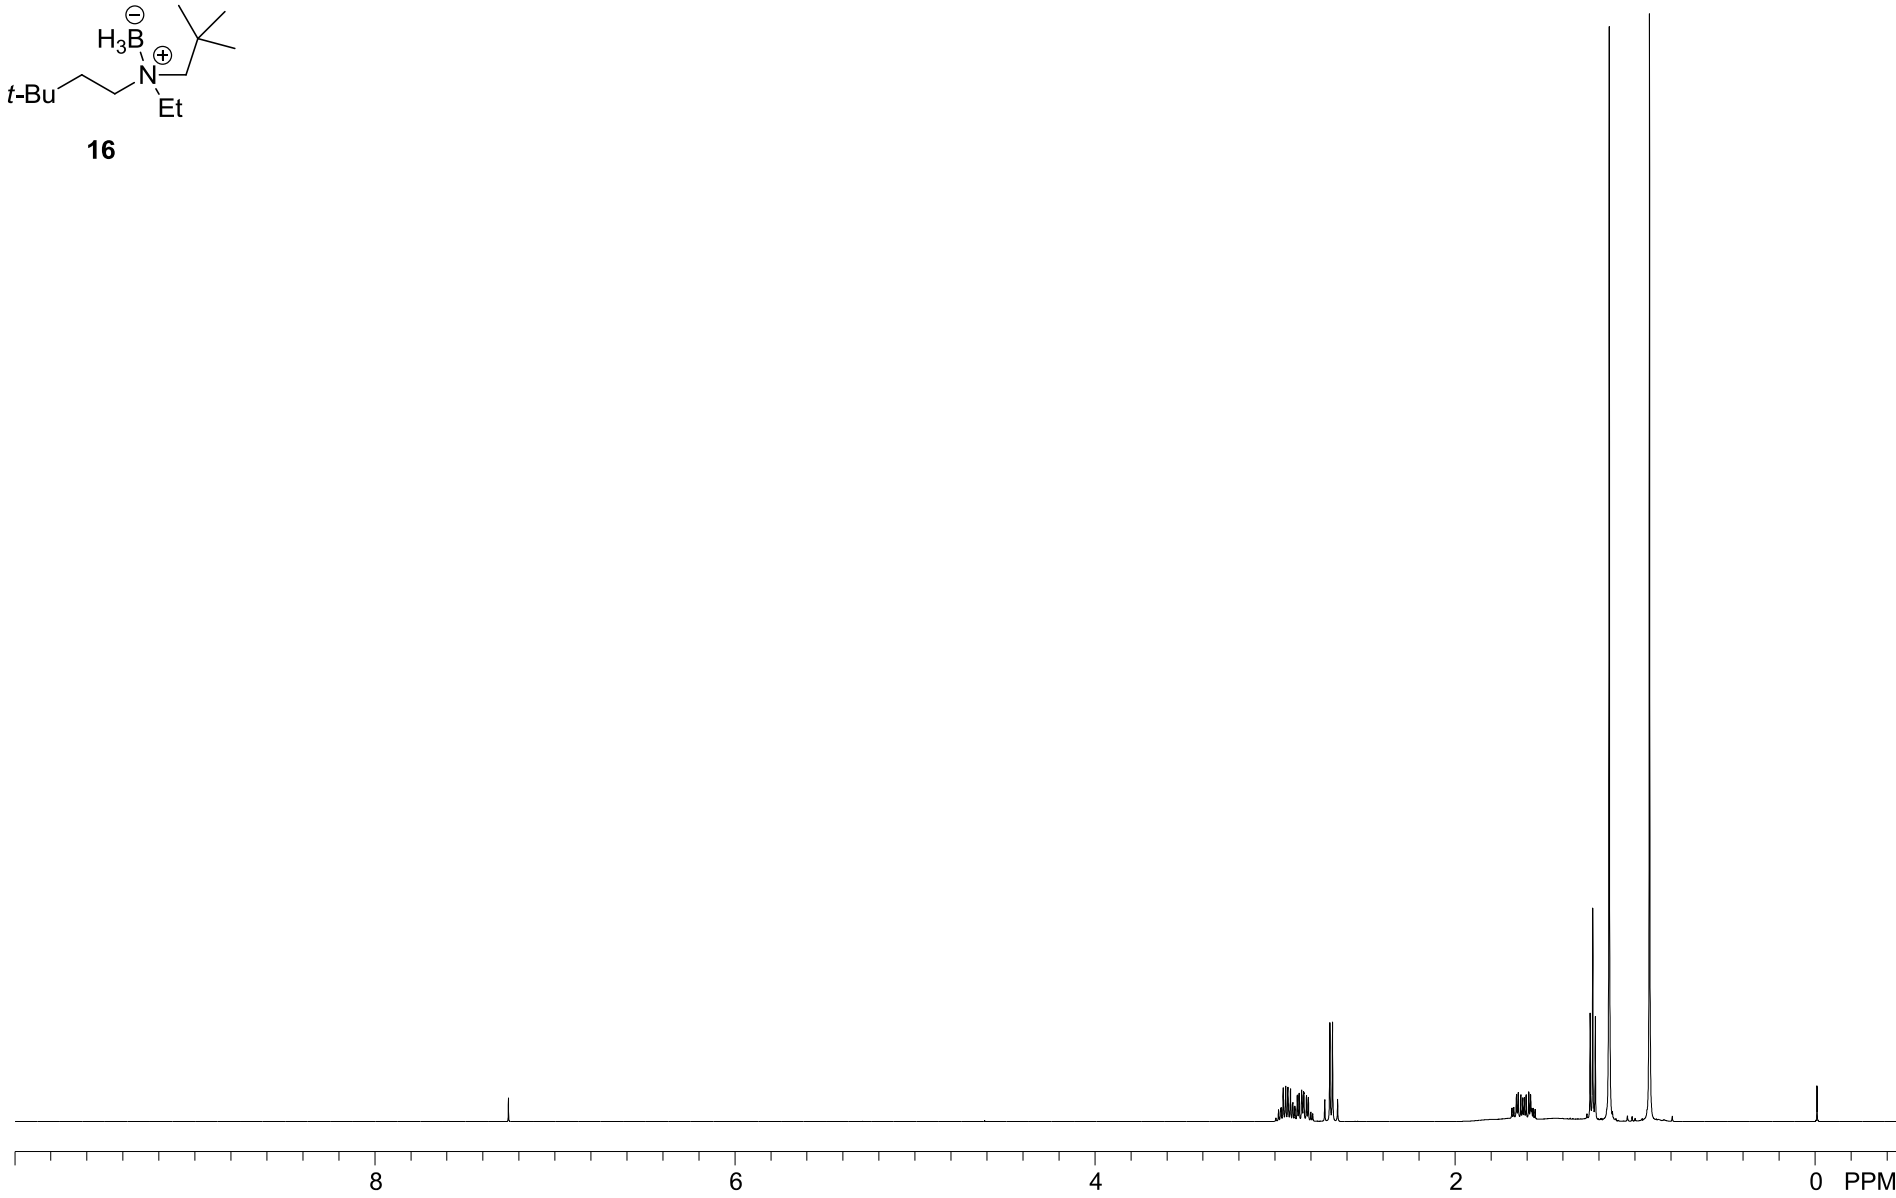

$^{11}\text{B}$  NMR (128 MHz),  
 $\text{CDCl}_3$

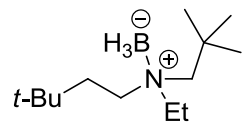

**16**

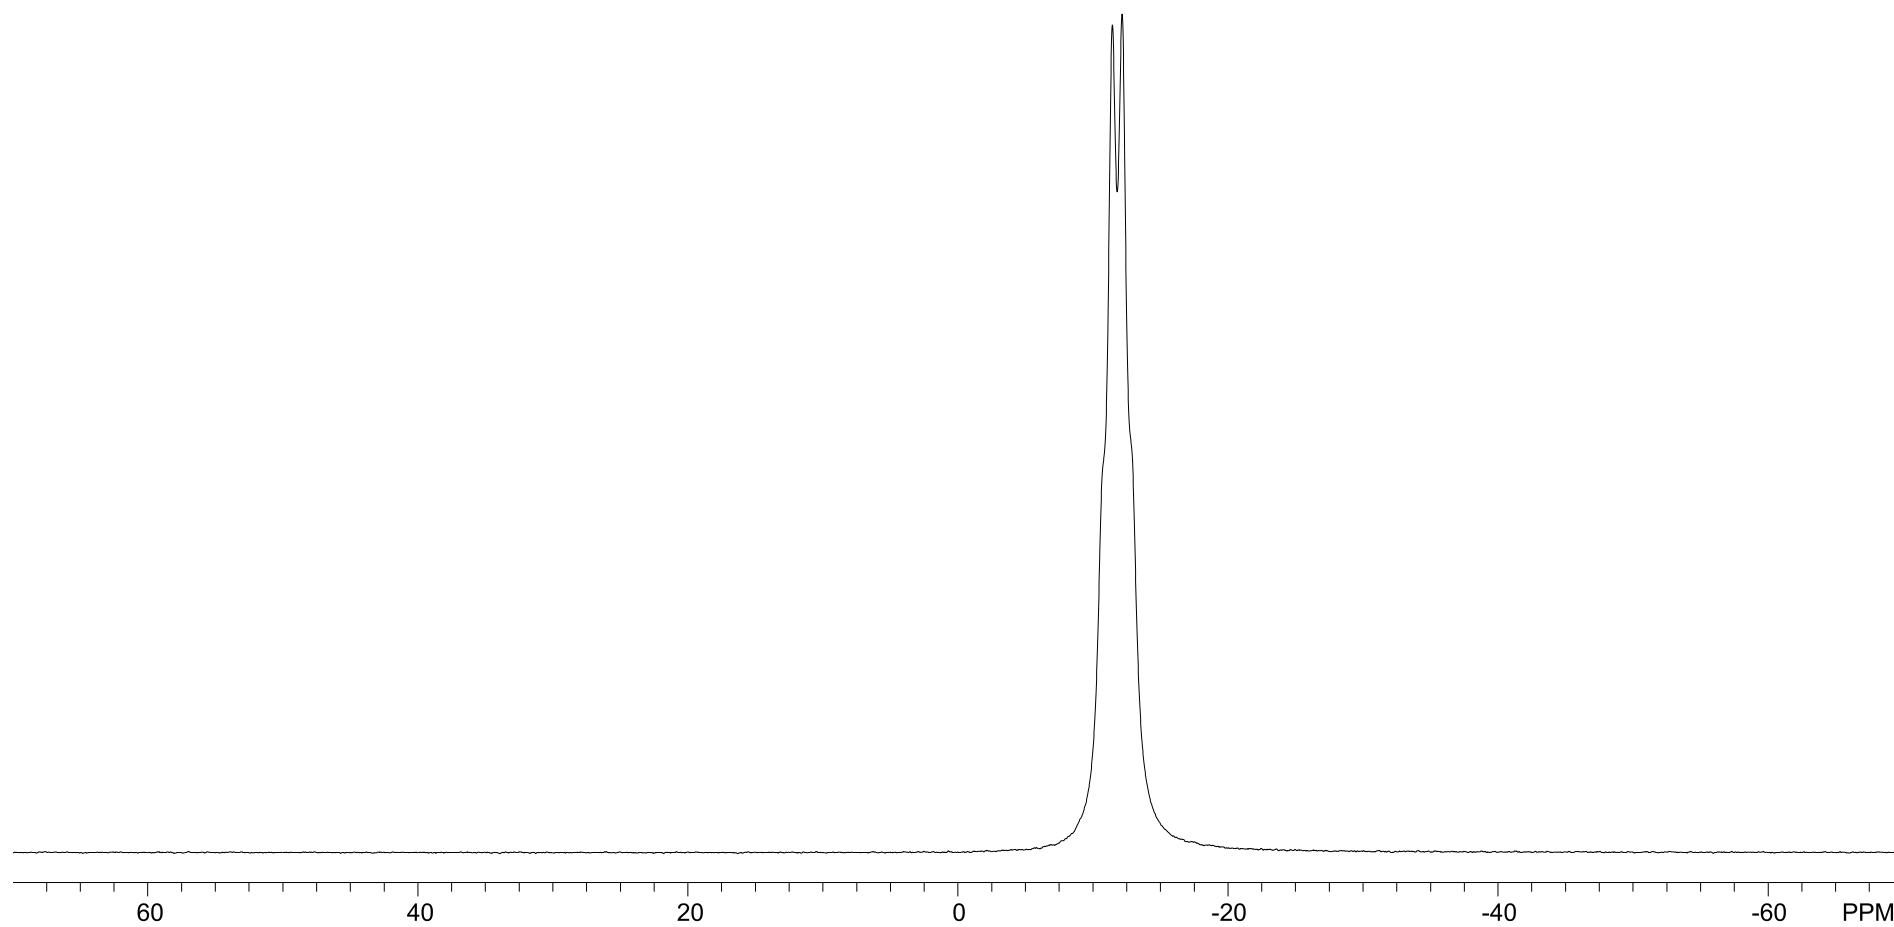

$^{11}\text{B}\{^1\text{H}\}$  NMR (128 MHz),  
 $\text{CDCl}_3$

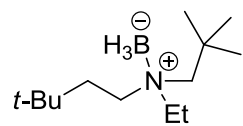

**16**

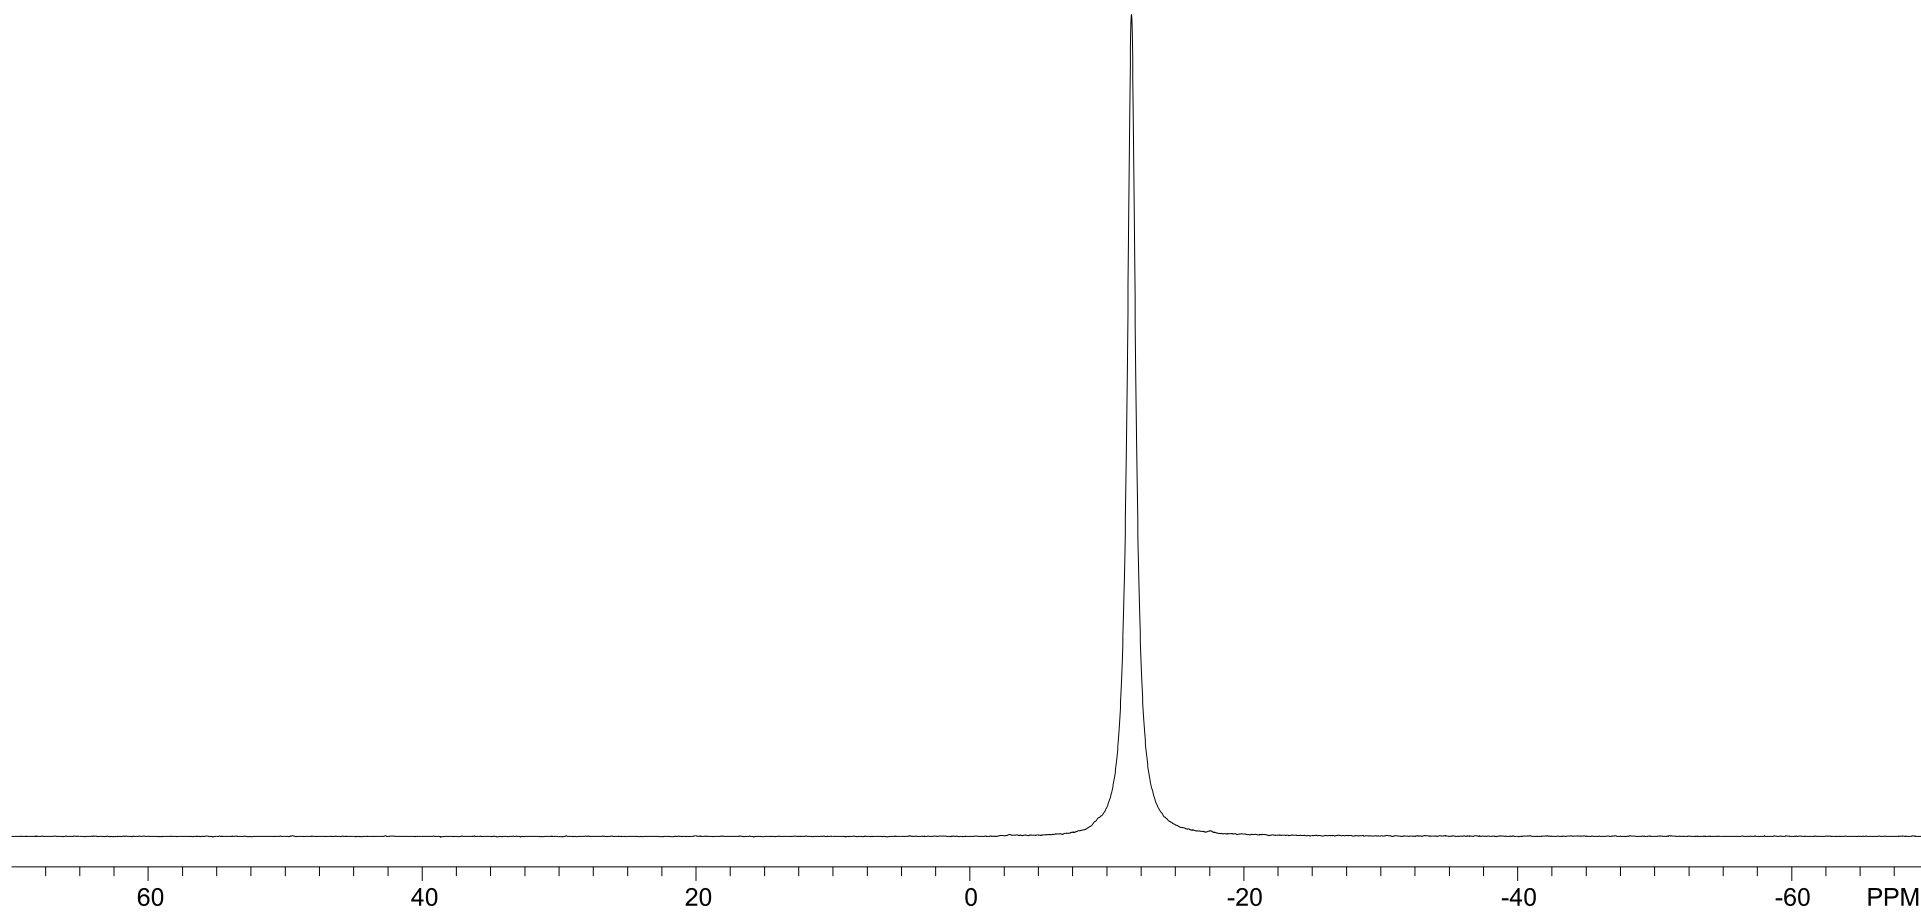

$^{13}\text{C}\{^1\text{H}\}$  NMR (126 MHz),  
 $\text{CDCl}_3$

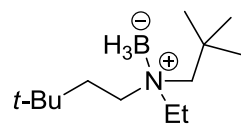

**16**

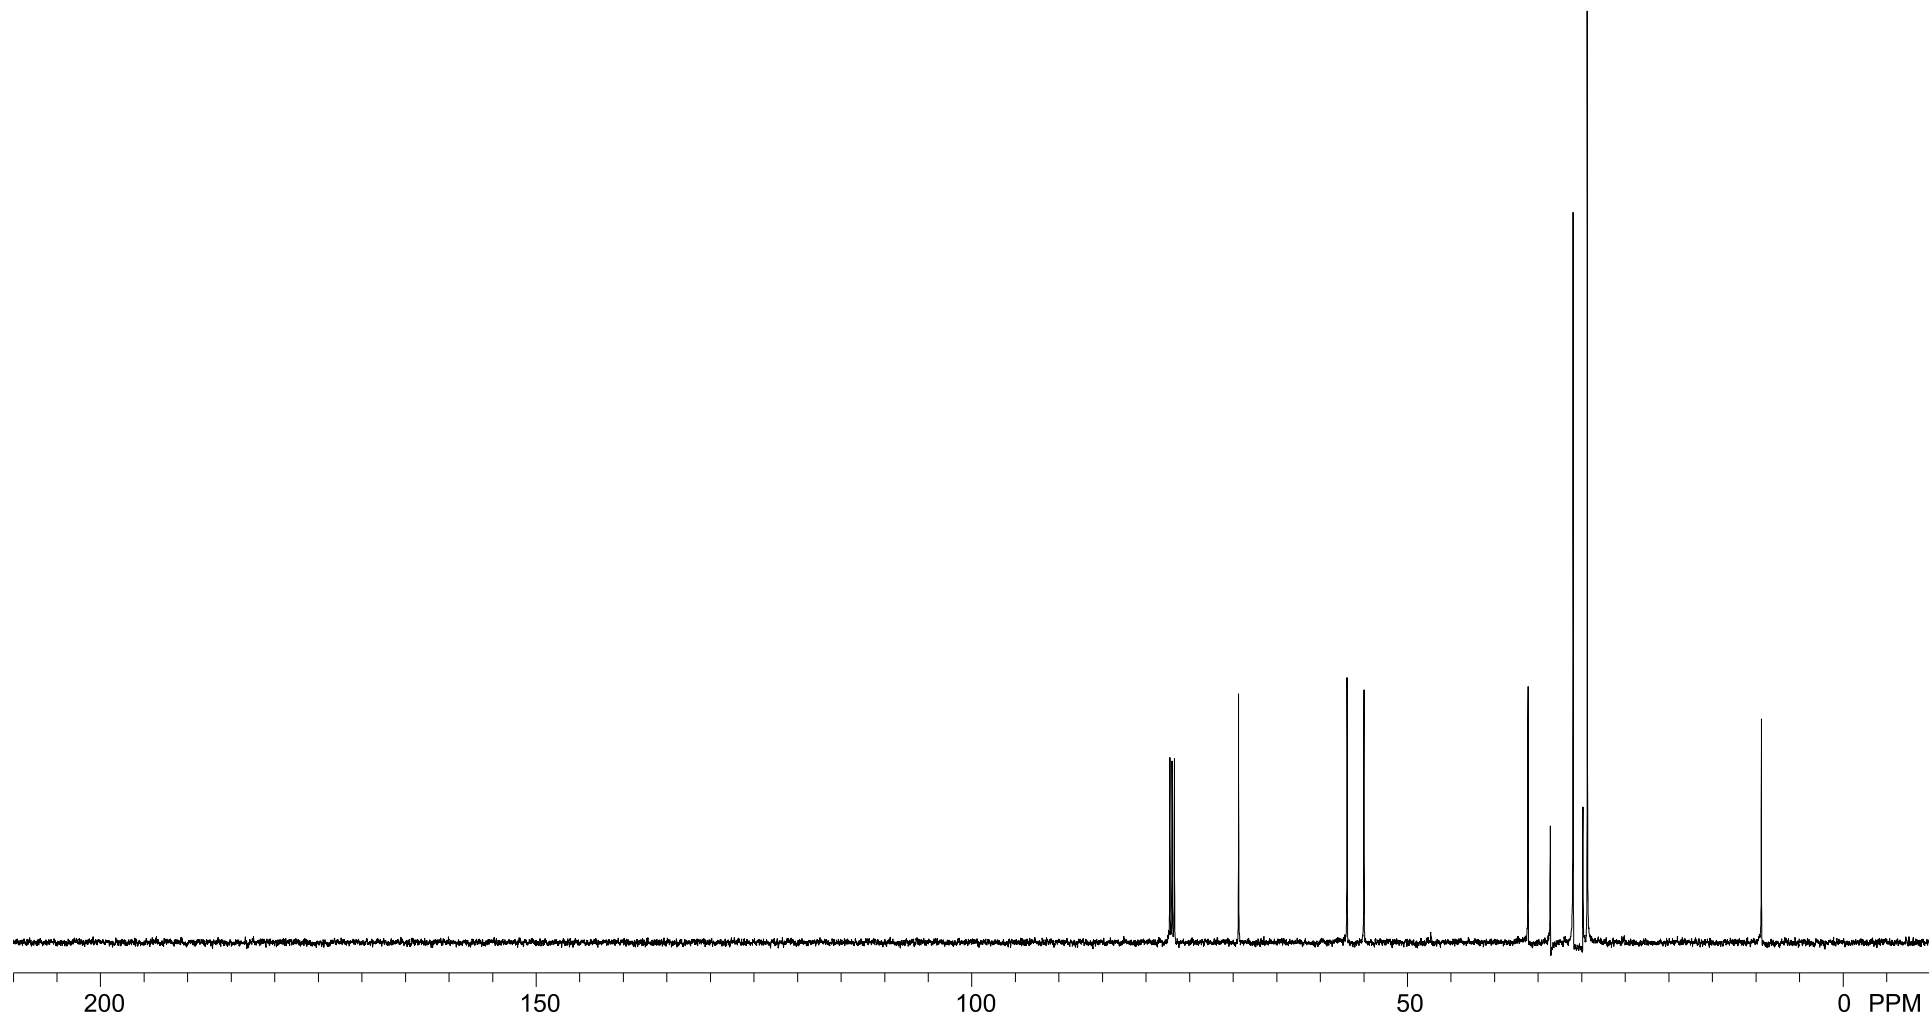

$^1\text{H}$  NMR (500 MHz),  
 $\text{CDCl}_3$

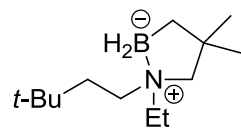

17

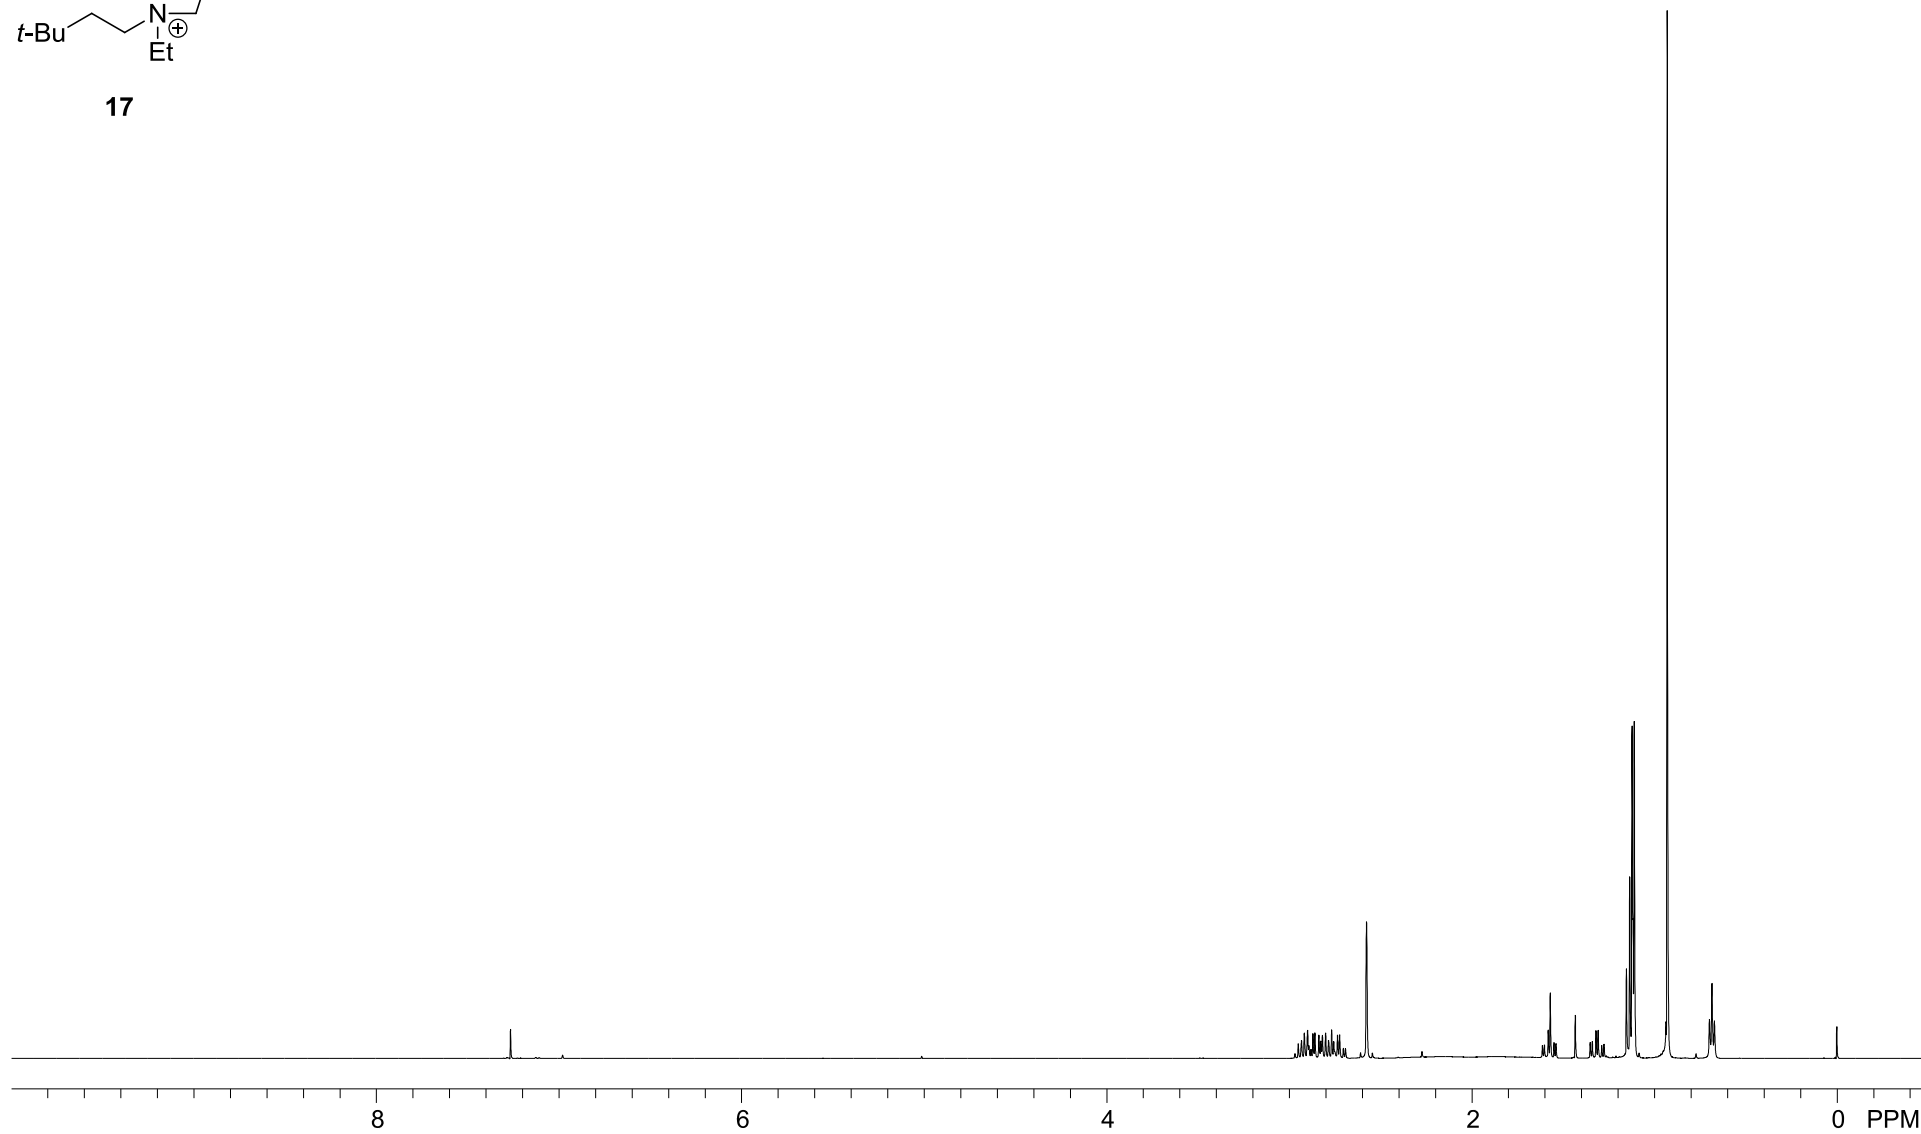

$^{11}\text{B}$  NMR (128 MHz),  
 $\text{CDCl}_3$

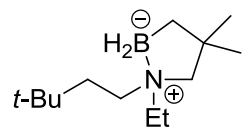

17

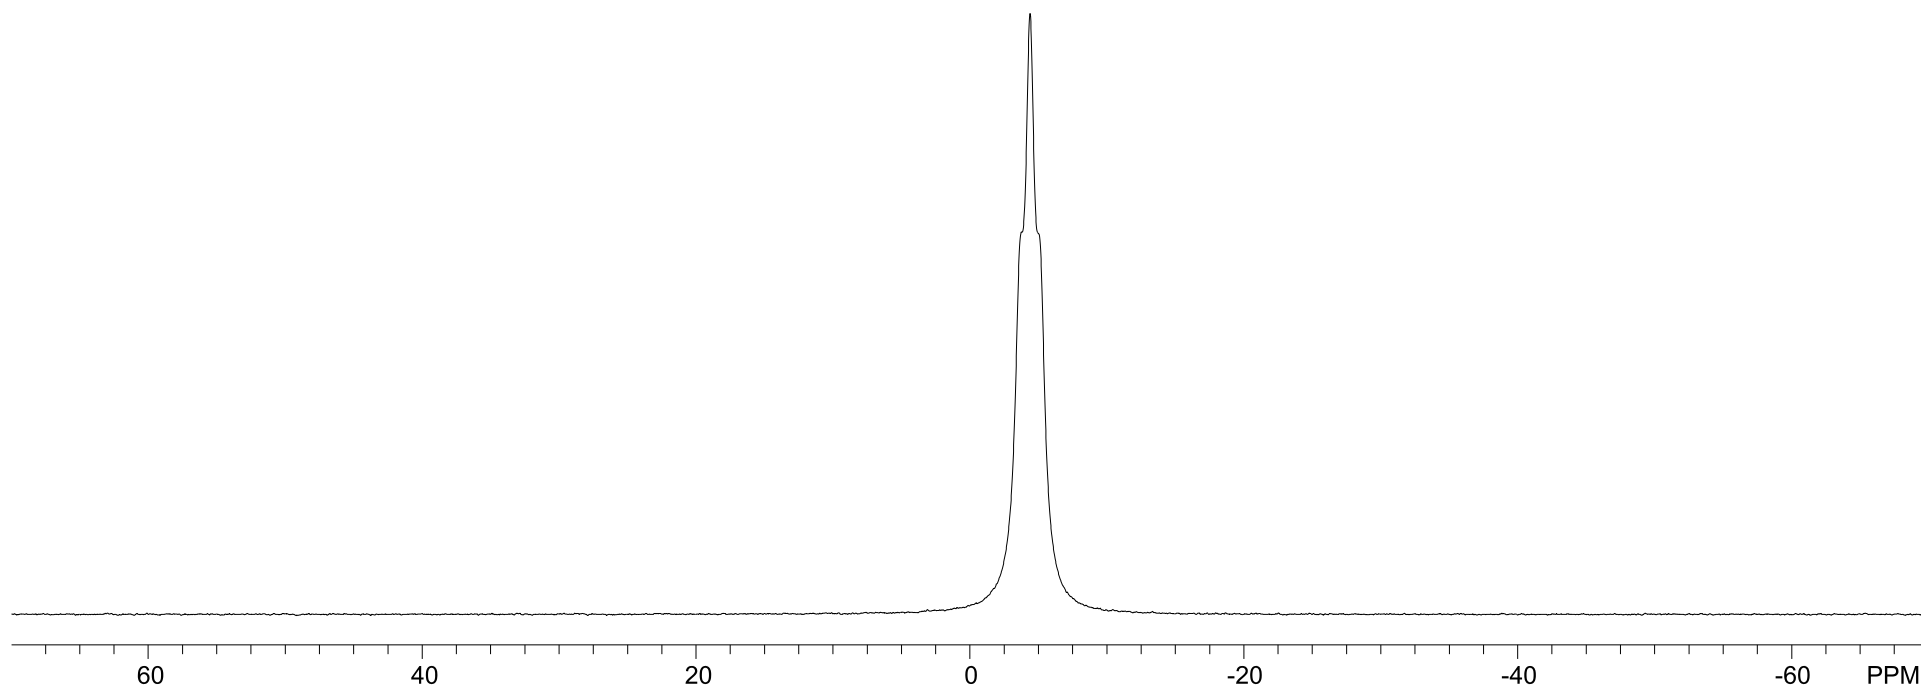

$^{11}\text{B}\{^1\text{H}\}$  NMR (128 MHz),  
 $\text{CDCl}_3$



17

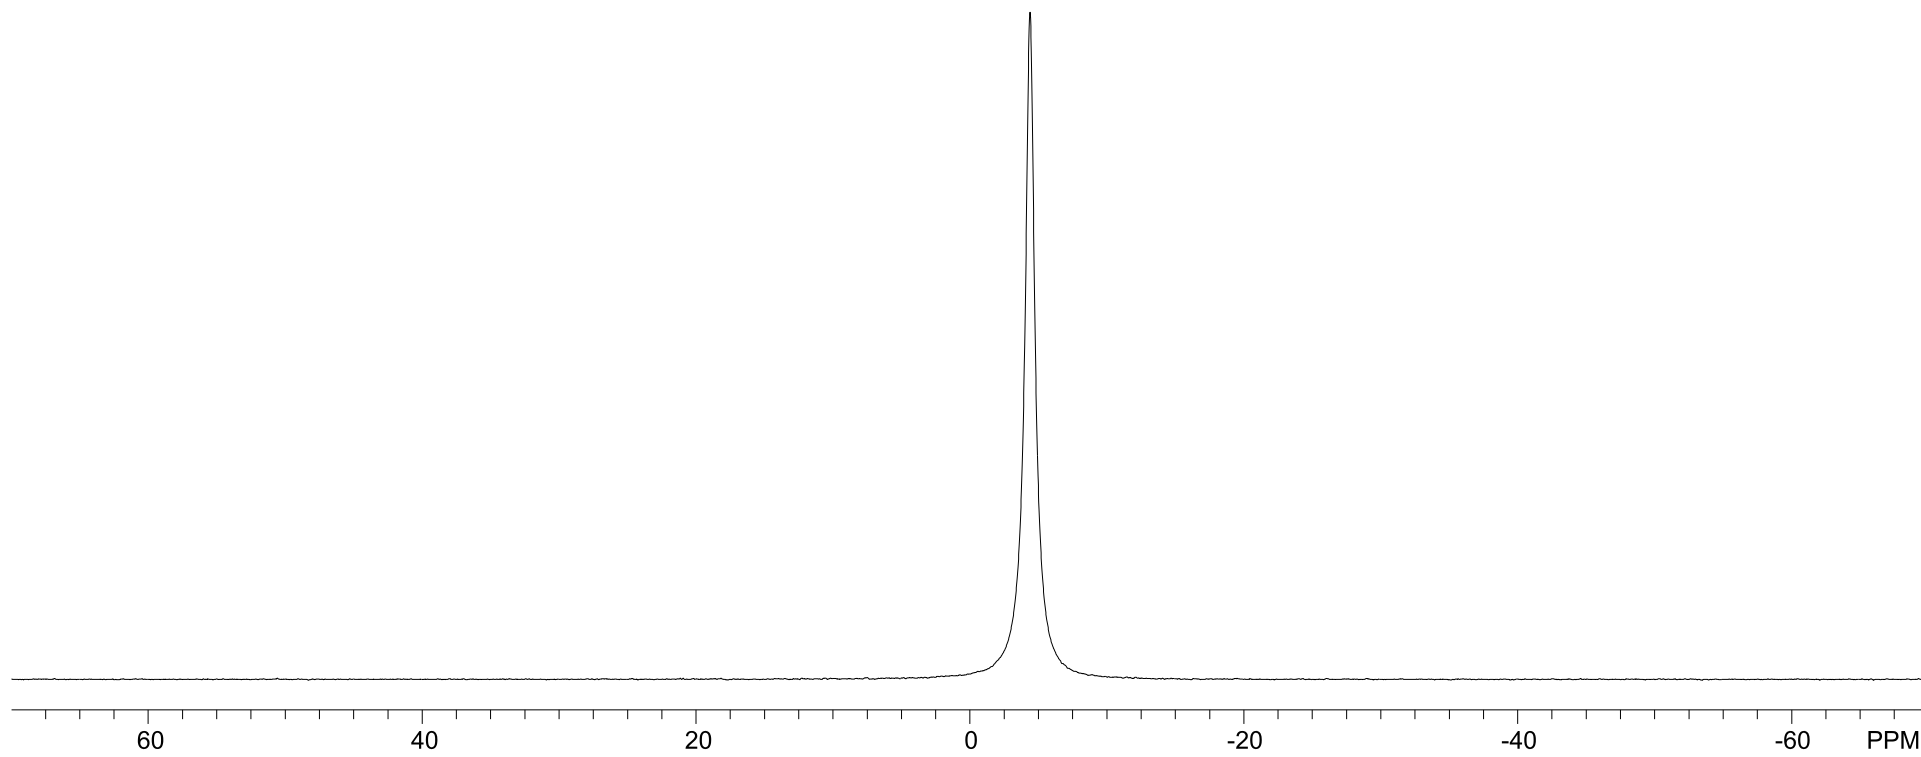

$^{13}\text{C}\{^1\text{H}\}$  NMR (126 MHz),  
 $\text{CDCl}_3$



17

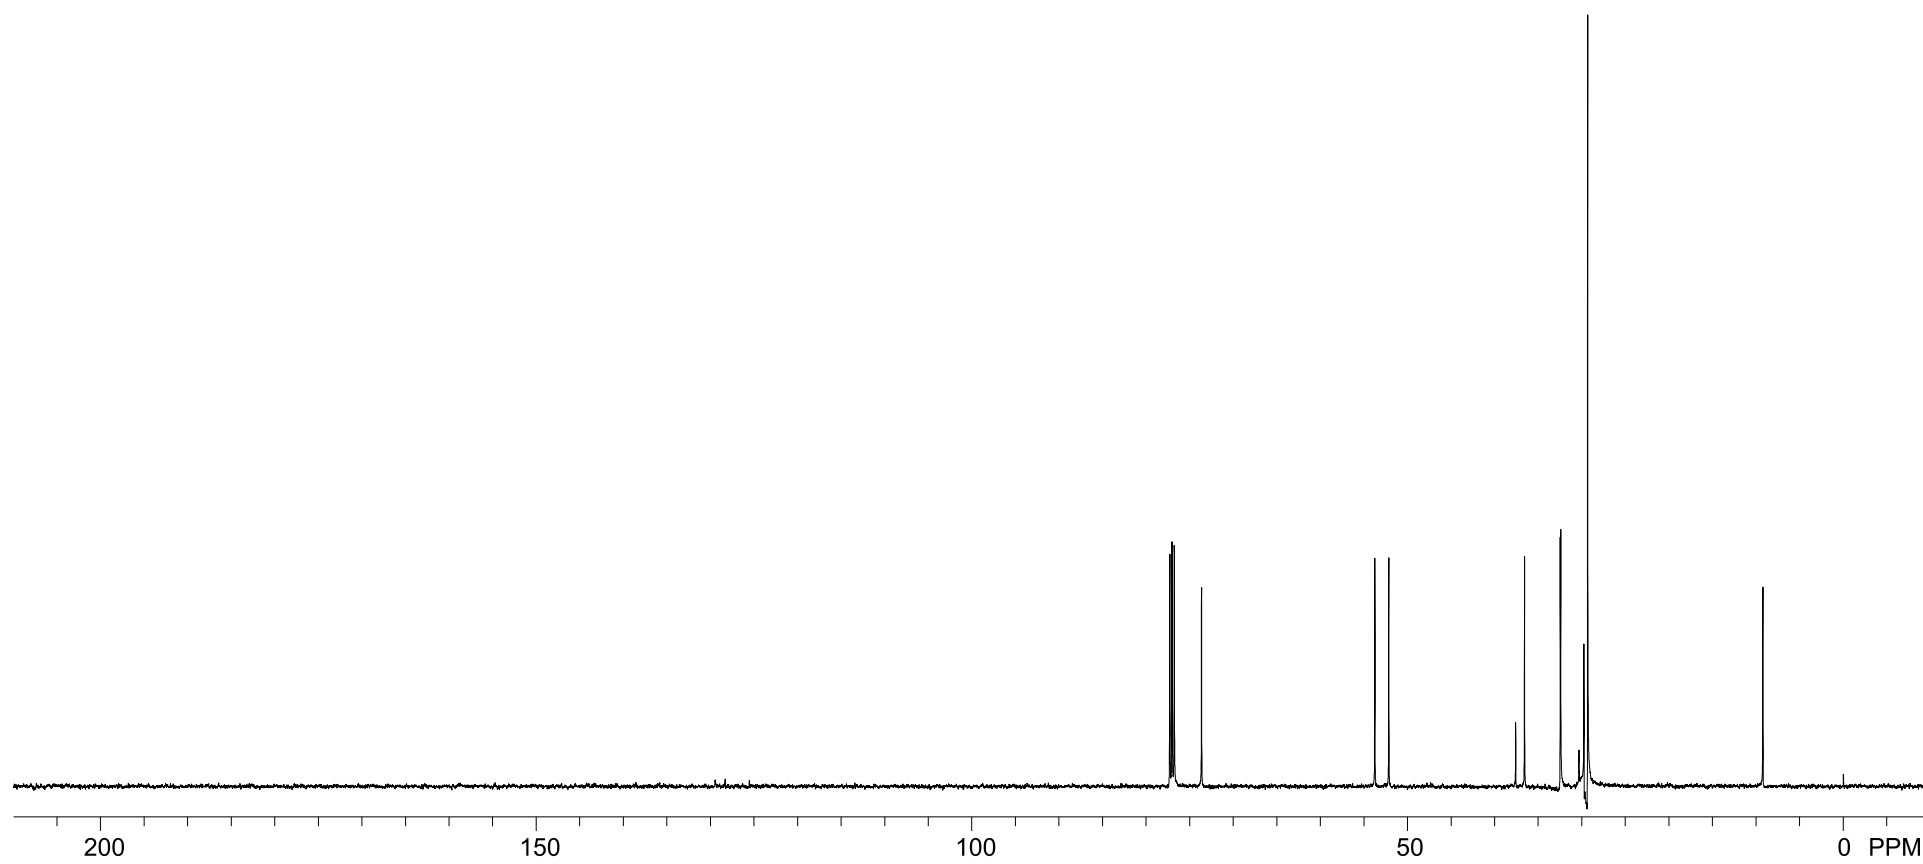



$^1\text{H}$  NMR (500 MHz),  
 $\text{CDCl}_3$

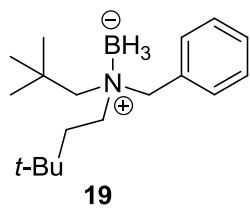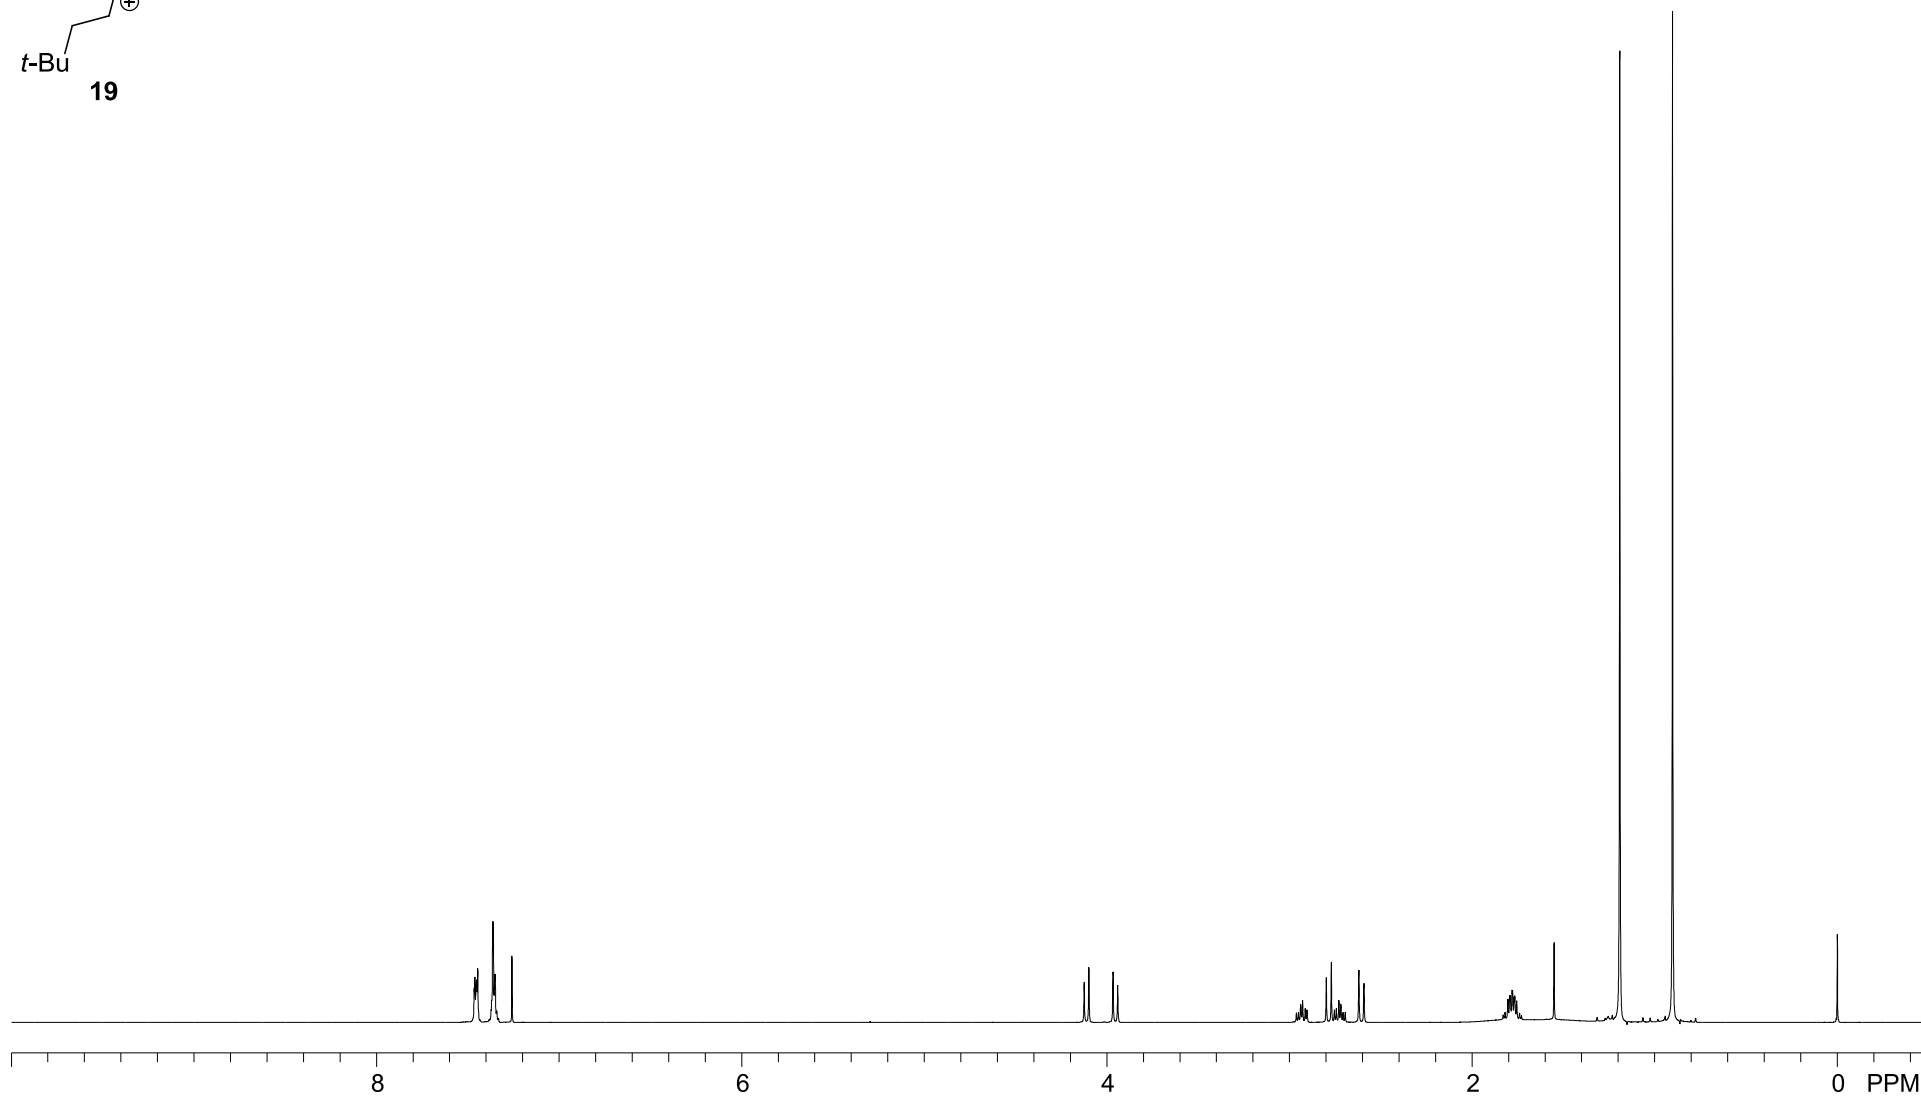

$^{11}\text{B}$  NMR (128 MHz),  
 $\text{CDCl}_3$

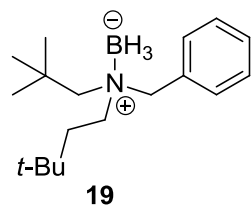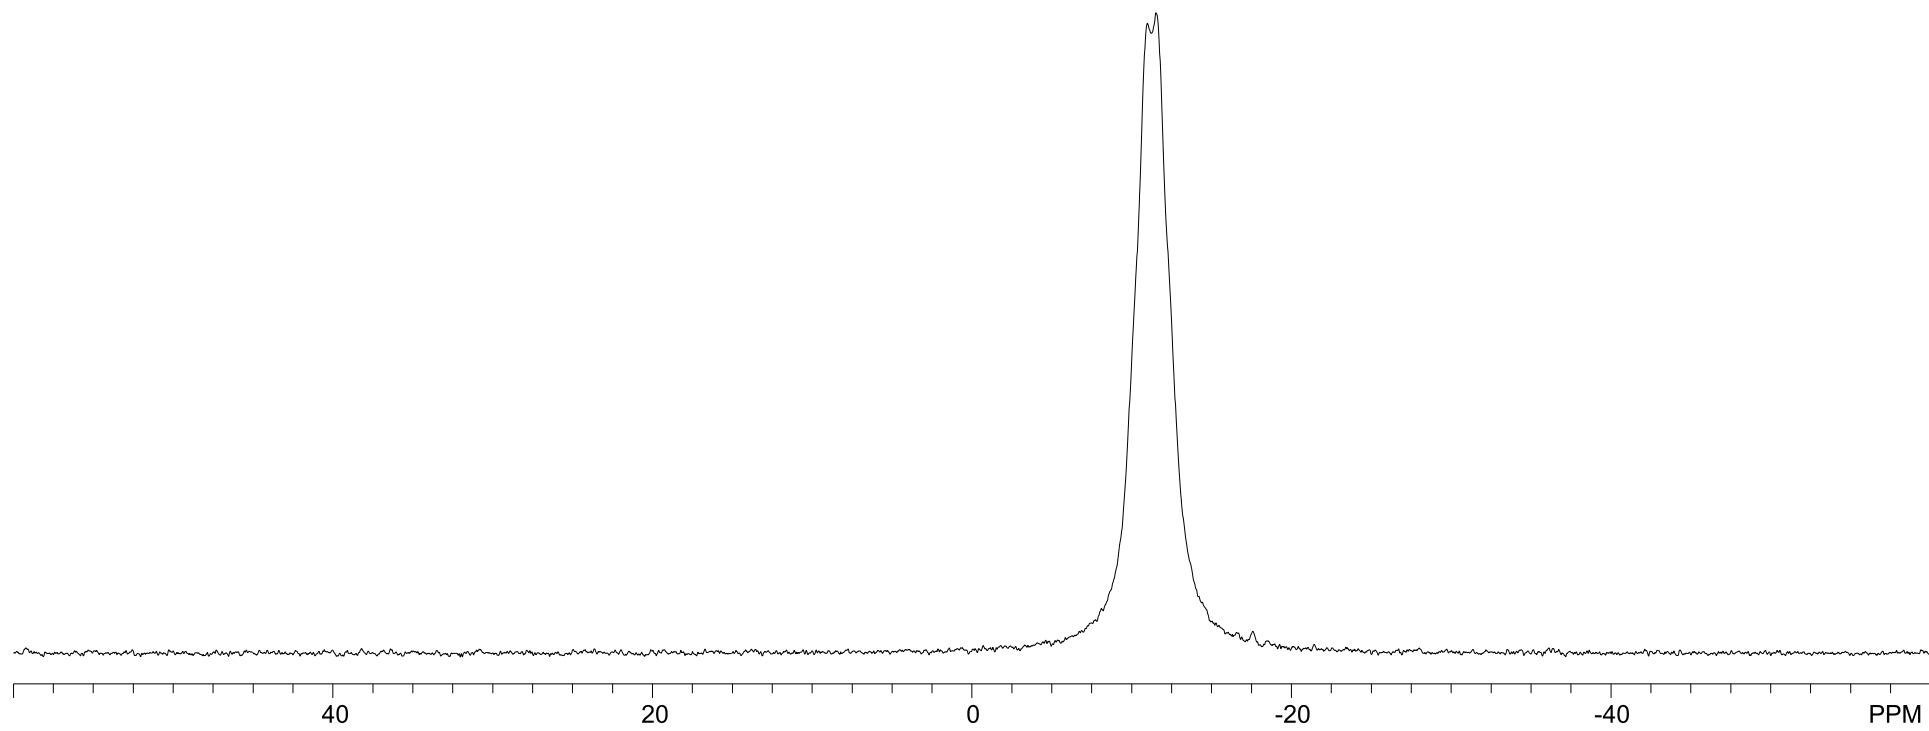

$^{11}\text{B}\{^1\text{H}\}$  NMR (128 MHz),  
 $\text{CDCl}_3$

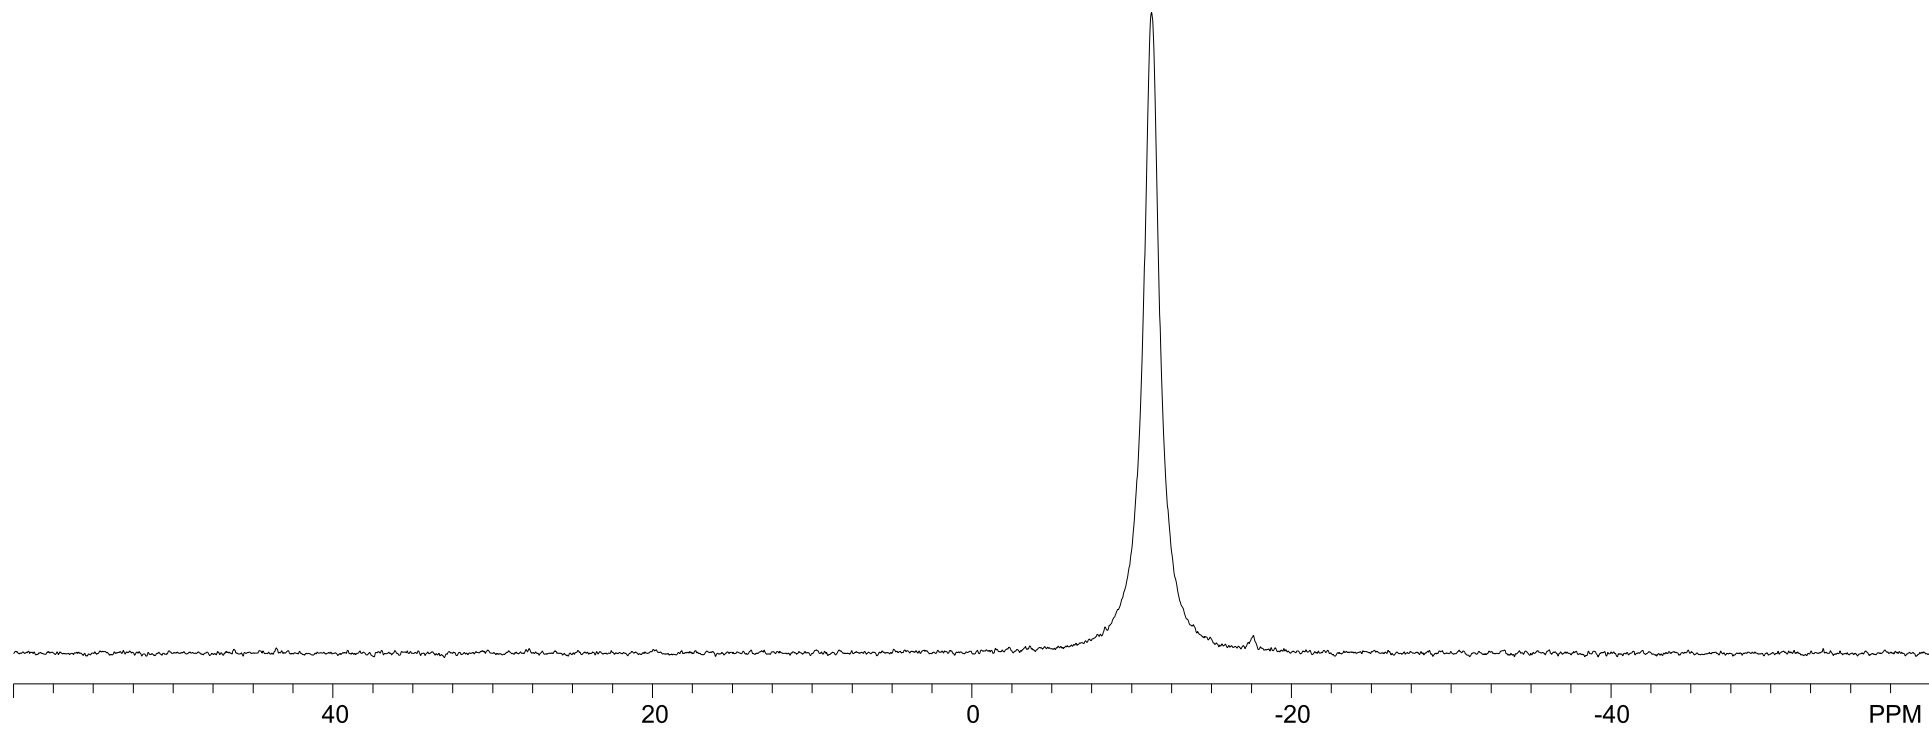

$^{13}\text{C}\{^1\text{H}\}$  NMR (126 MHz),  
 $\text{CDCl}_3$

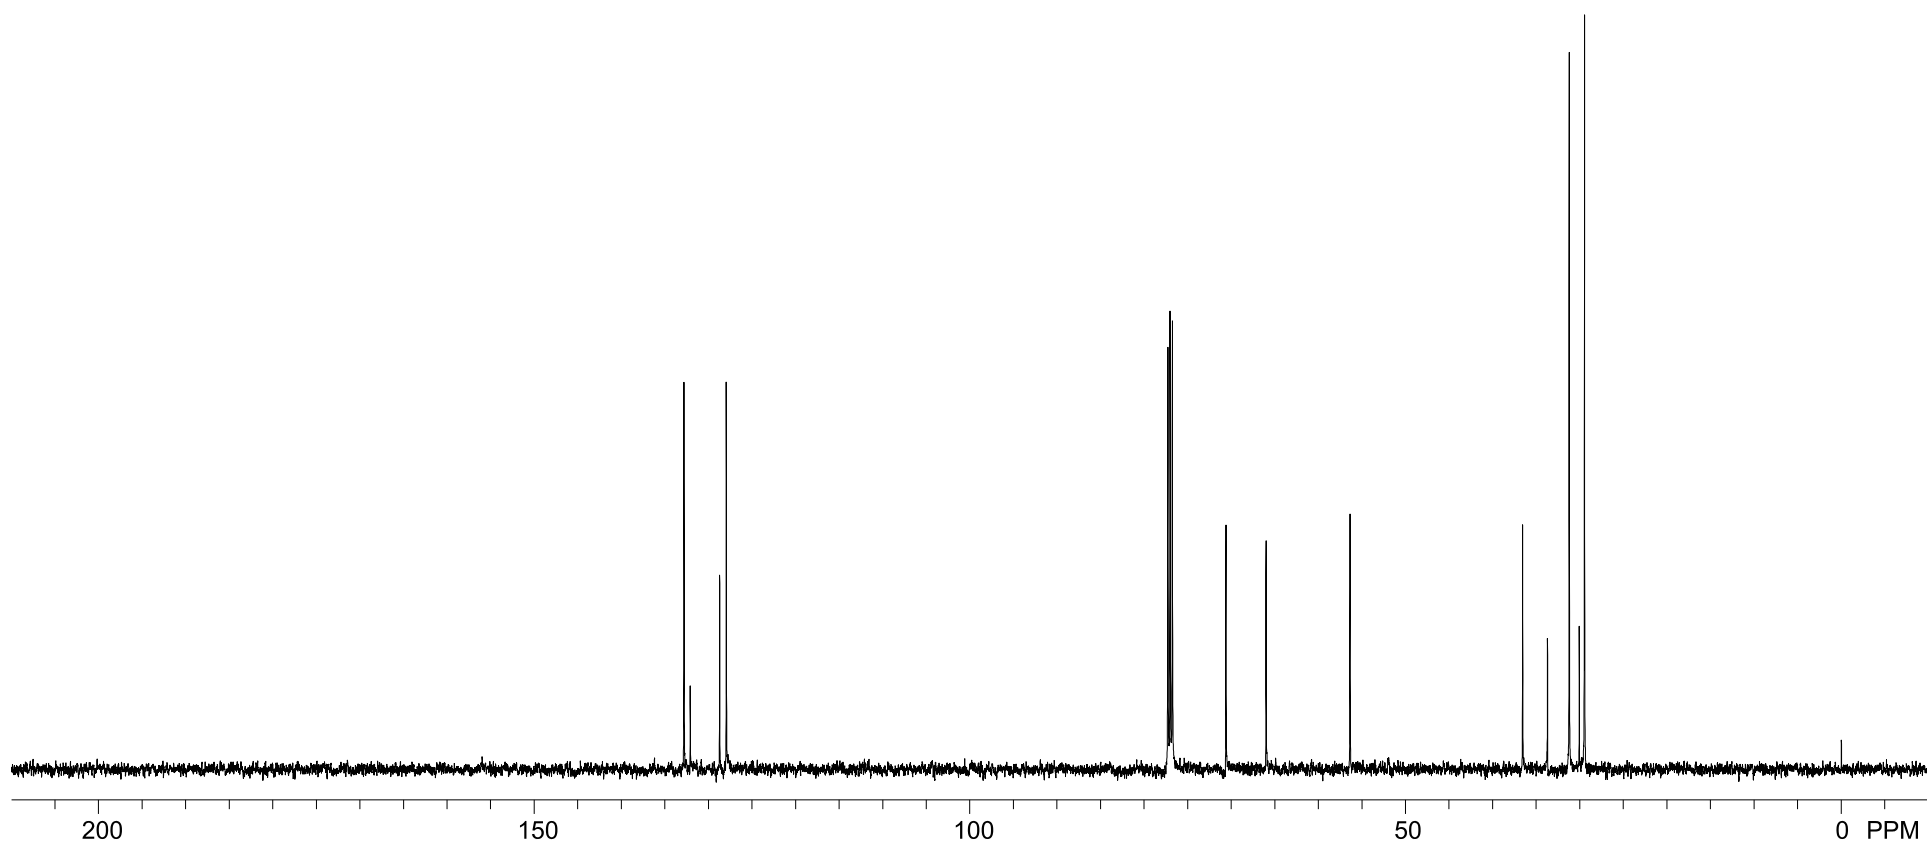

$^1\text{H}$  NMR (400 MHz),  
 $\text{CDCl}_3$

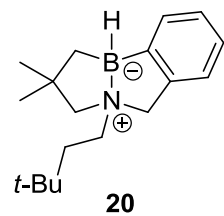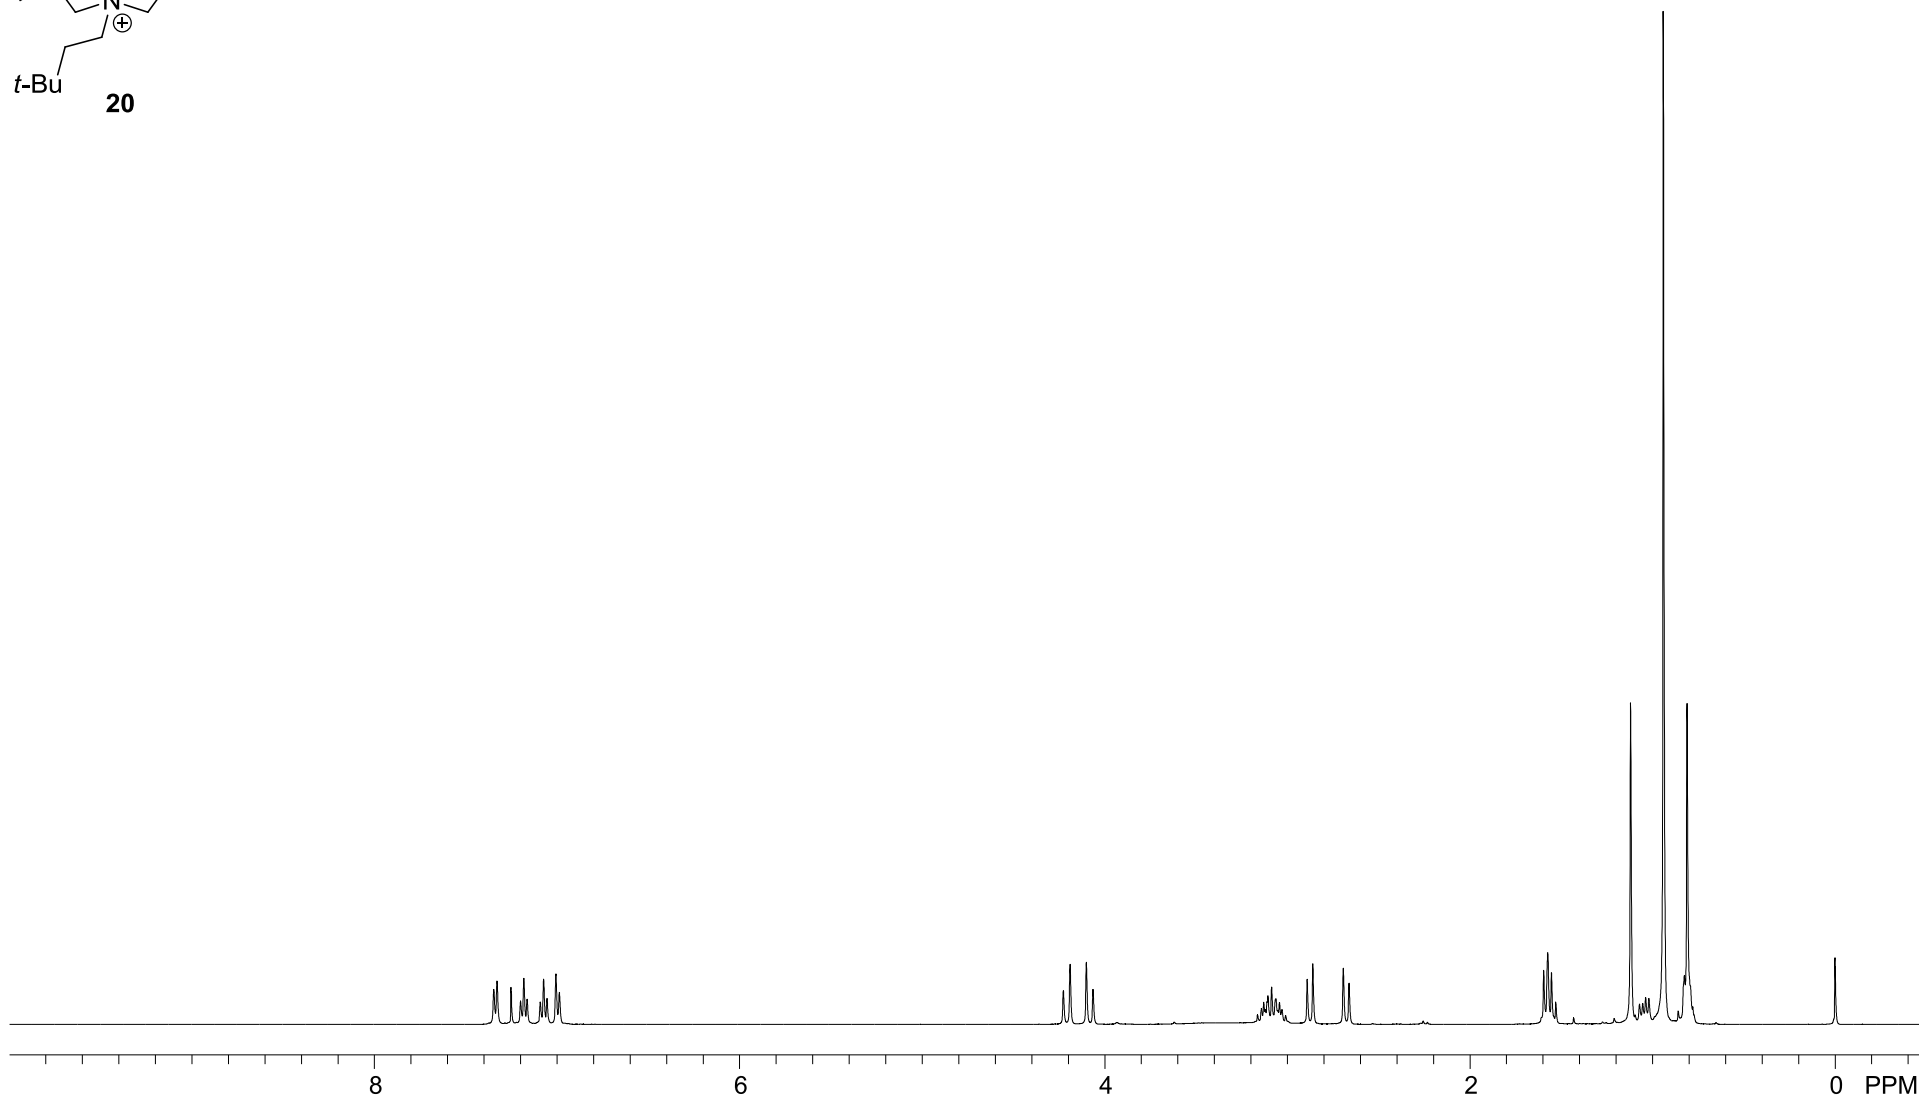

$^{11}\text{B}$  NMR (128 MHz),  
 $\text{CDCl}_3$

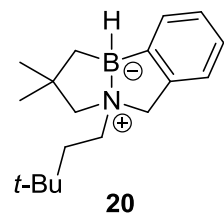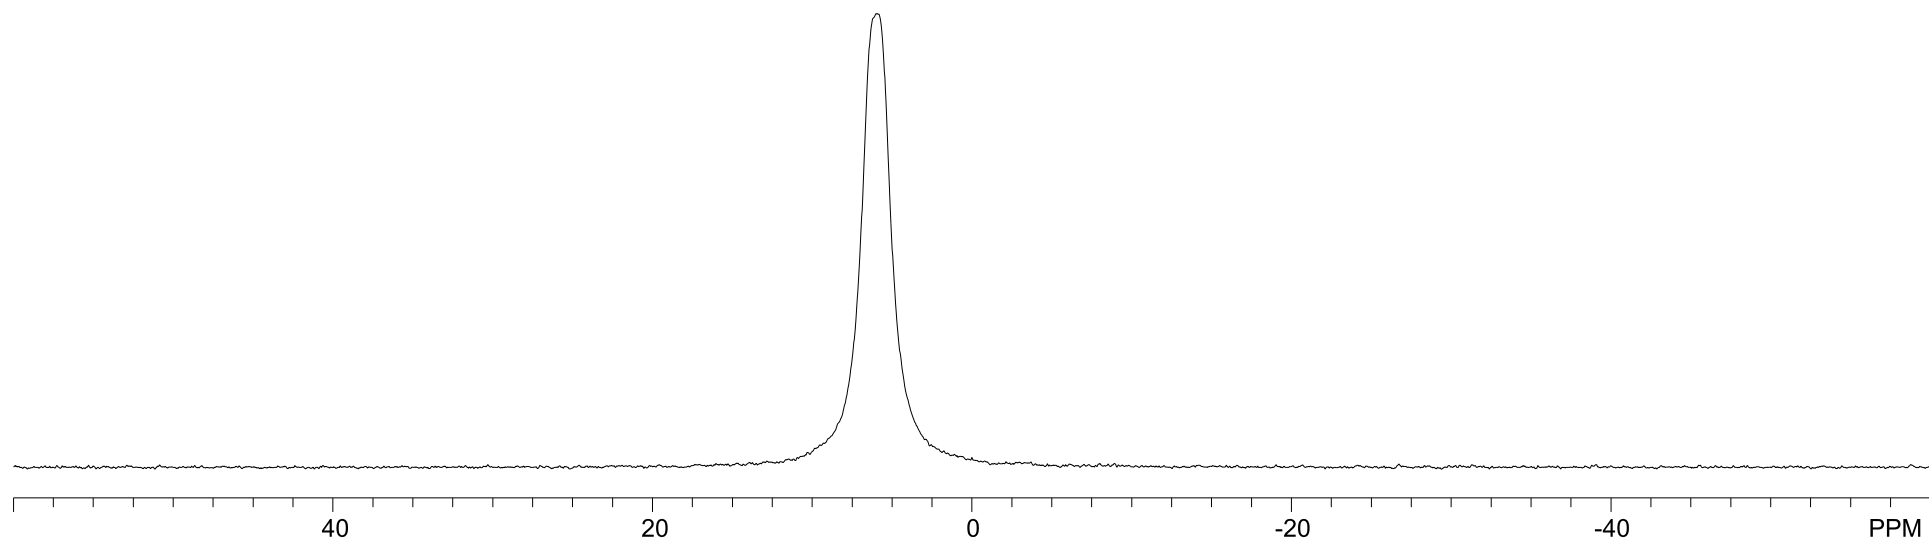

$^{11}\text{B}\{^1\text{H}\}$  NMR (128 MHz),  
 $\text{CDCl}_3$

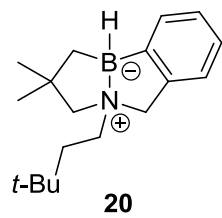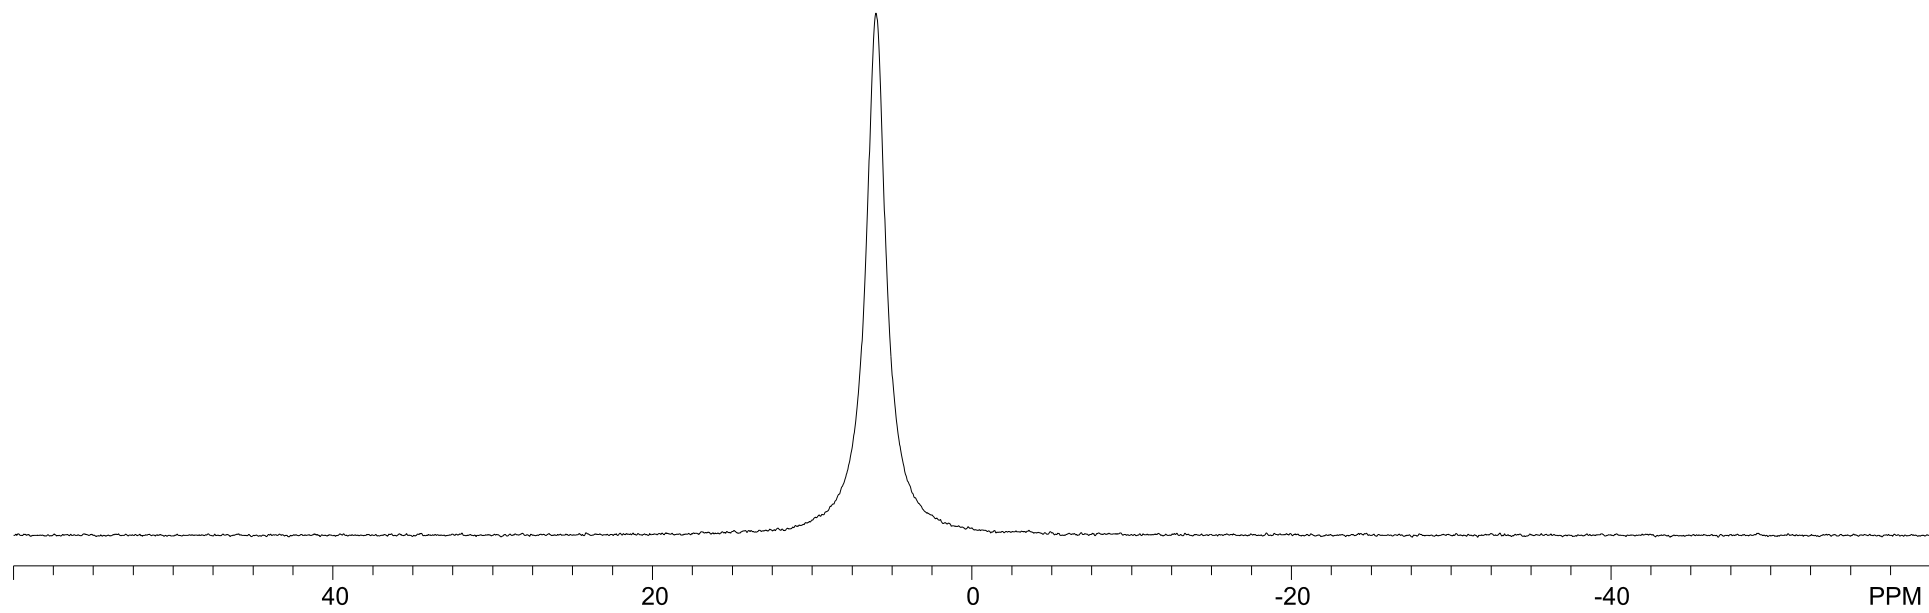

$^{13}\text{C}\{^1\text{H}\}$  NMR (126 MHz),  
 $\text{CDCl}_3$

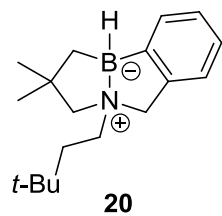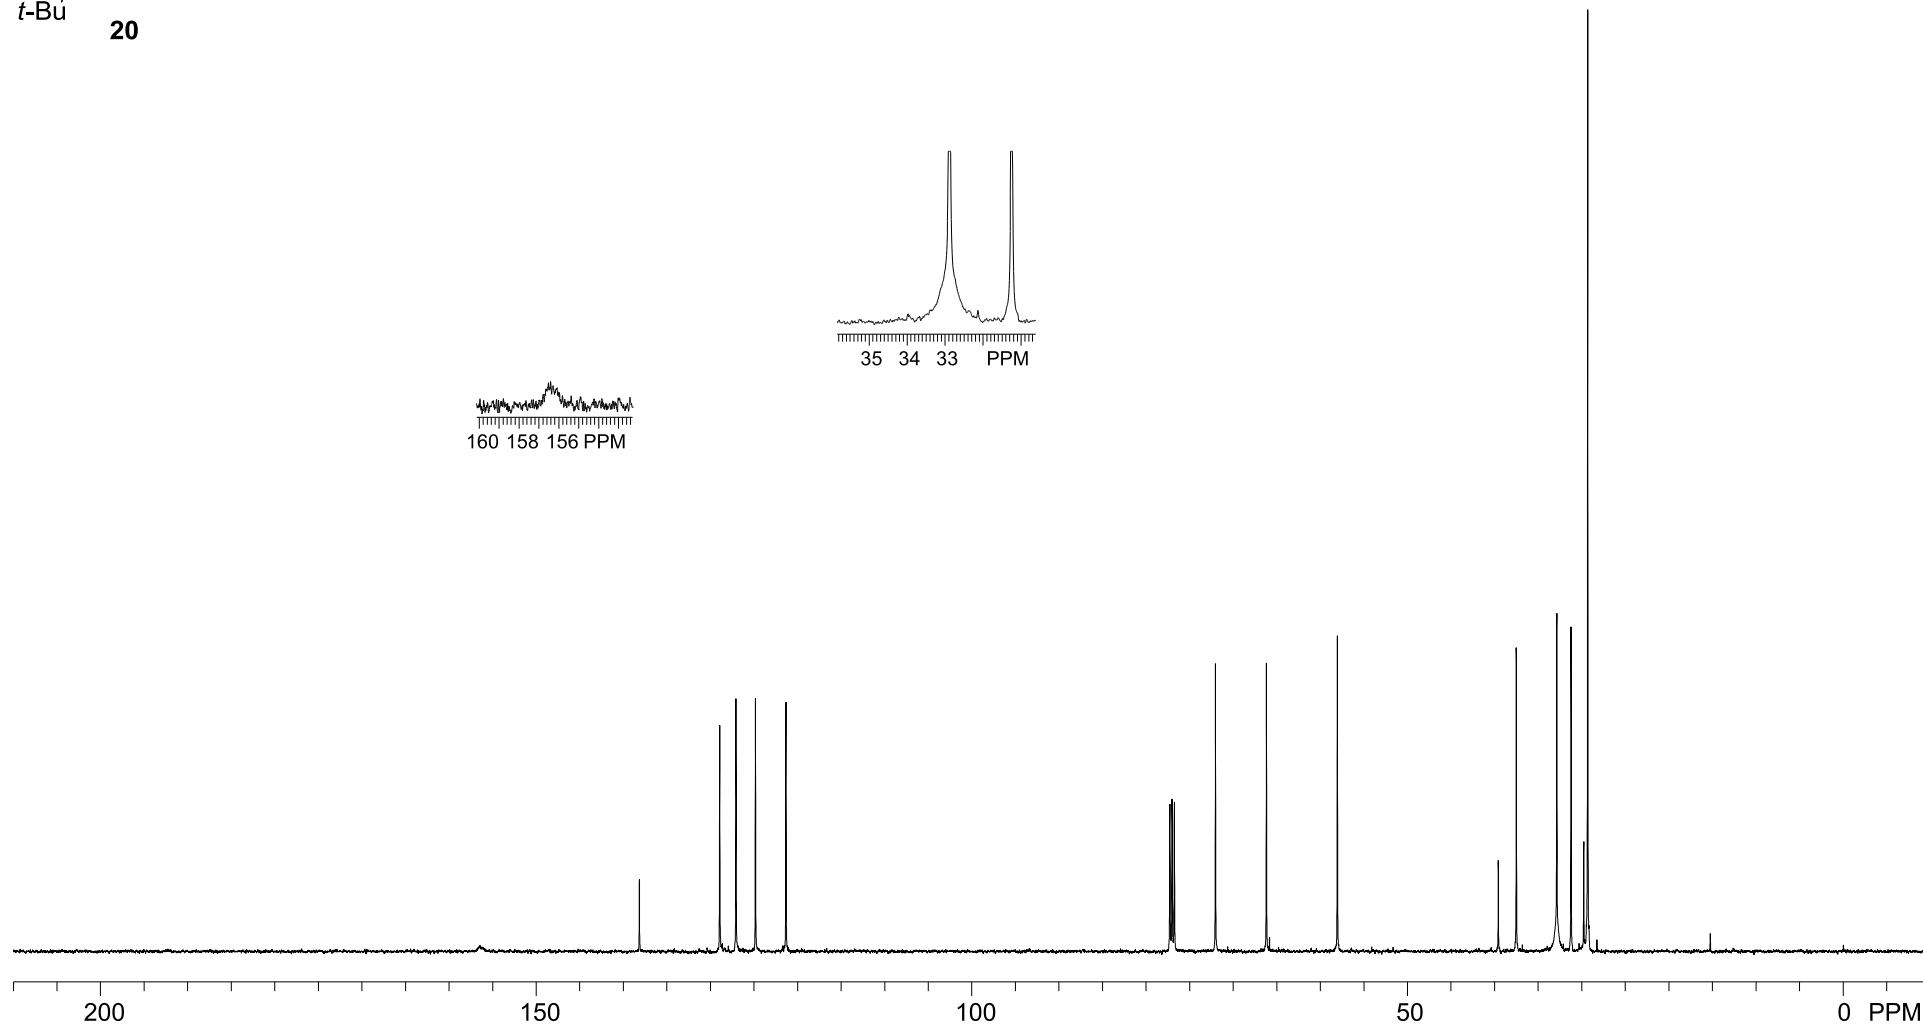



$^1\text{H}$  NMR (500 MHz),  
 $\text{CDCl}_3$

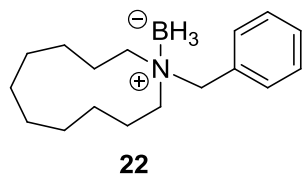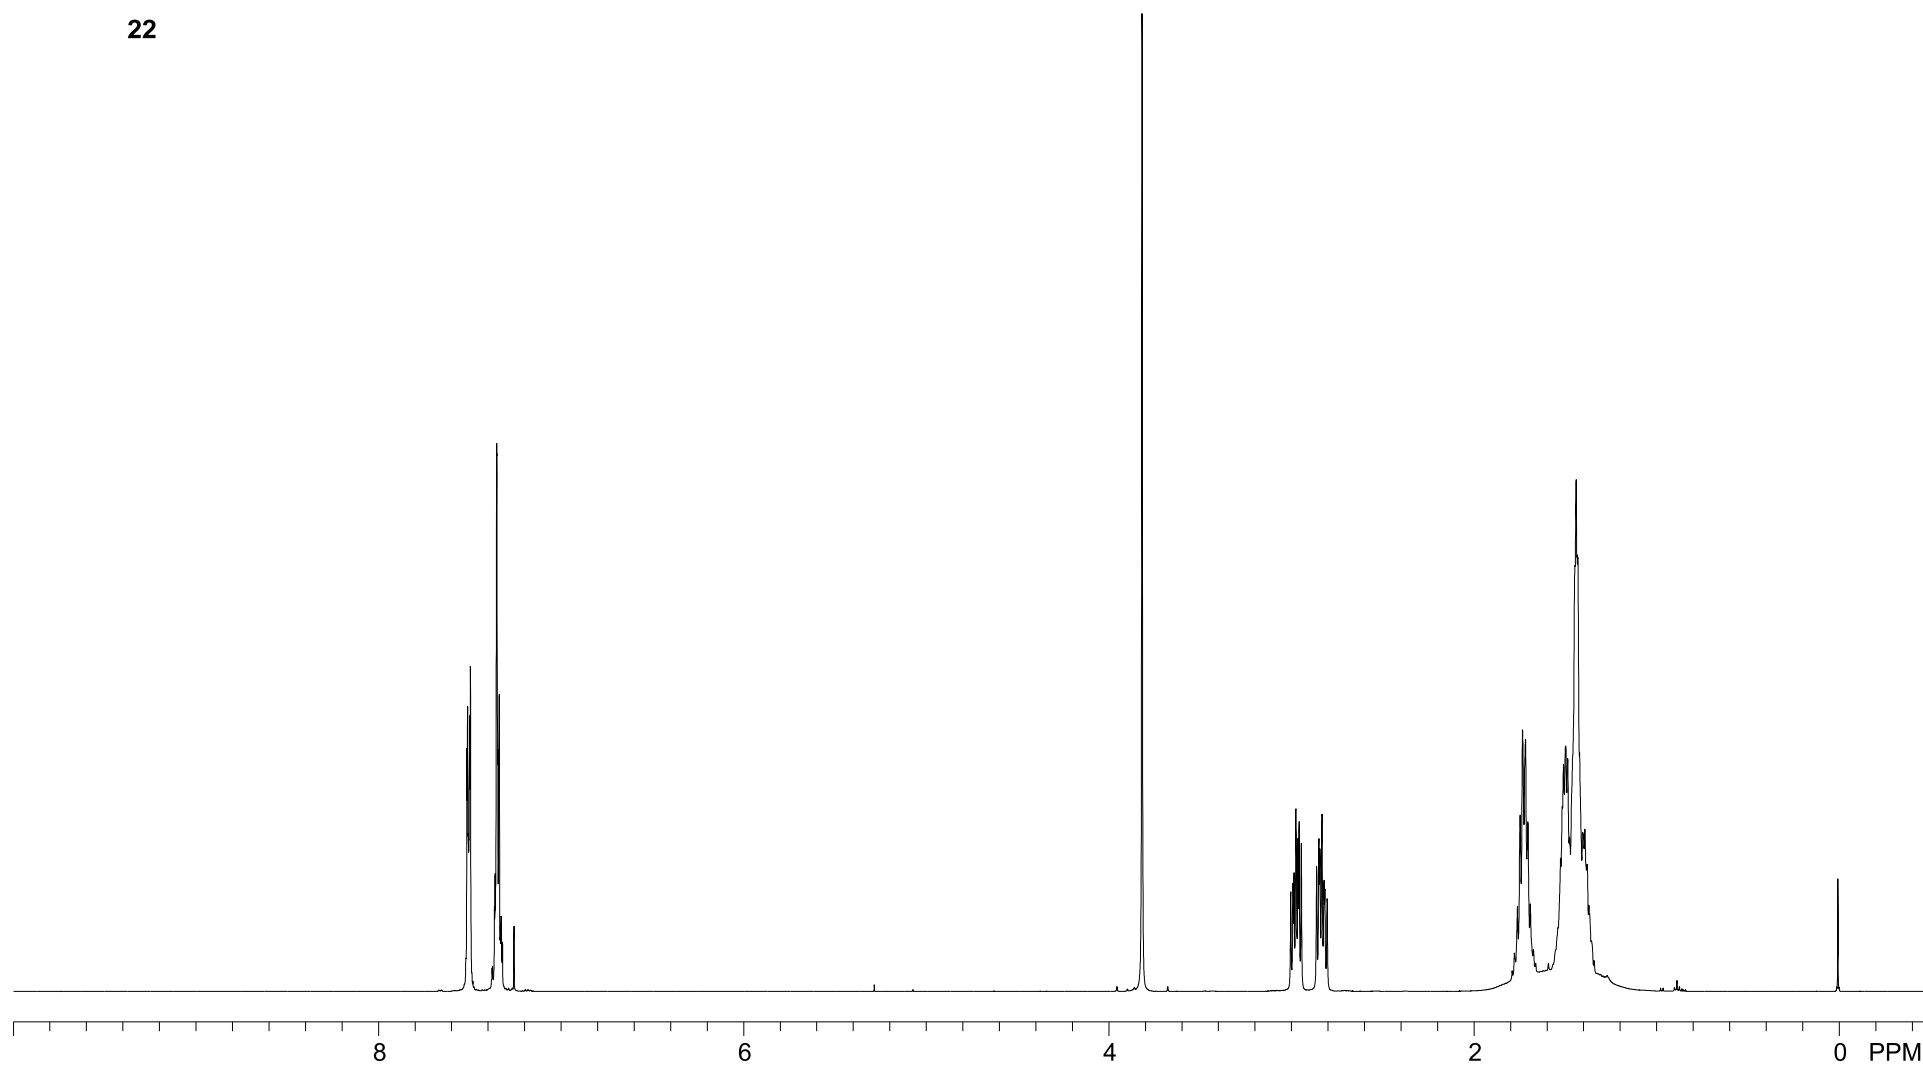

$^{11}\text{B}$  NMR (128 MHz),  
 $\text{CDCl}_3$

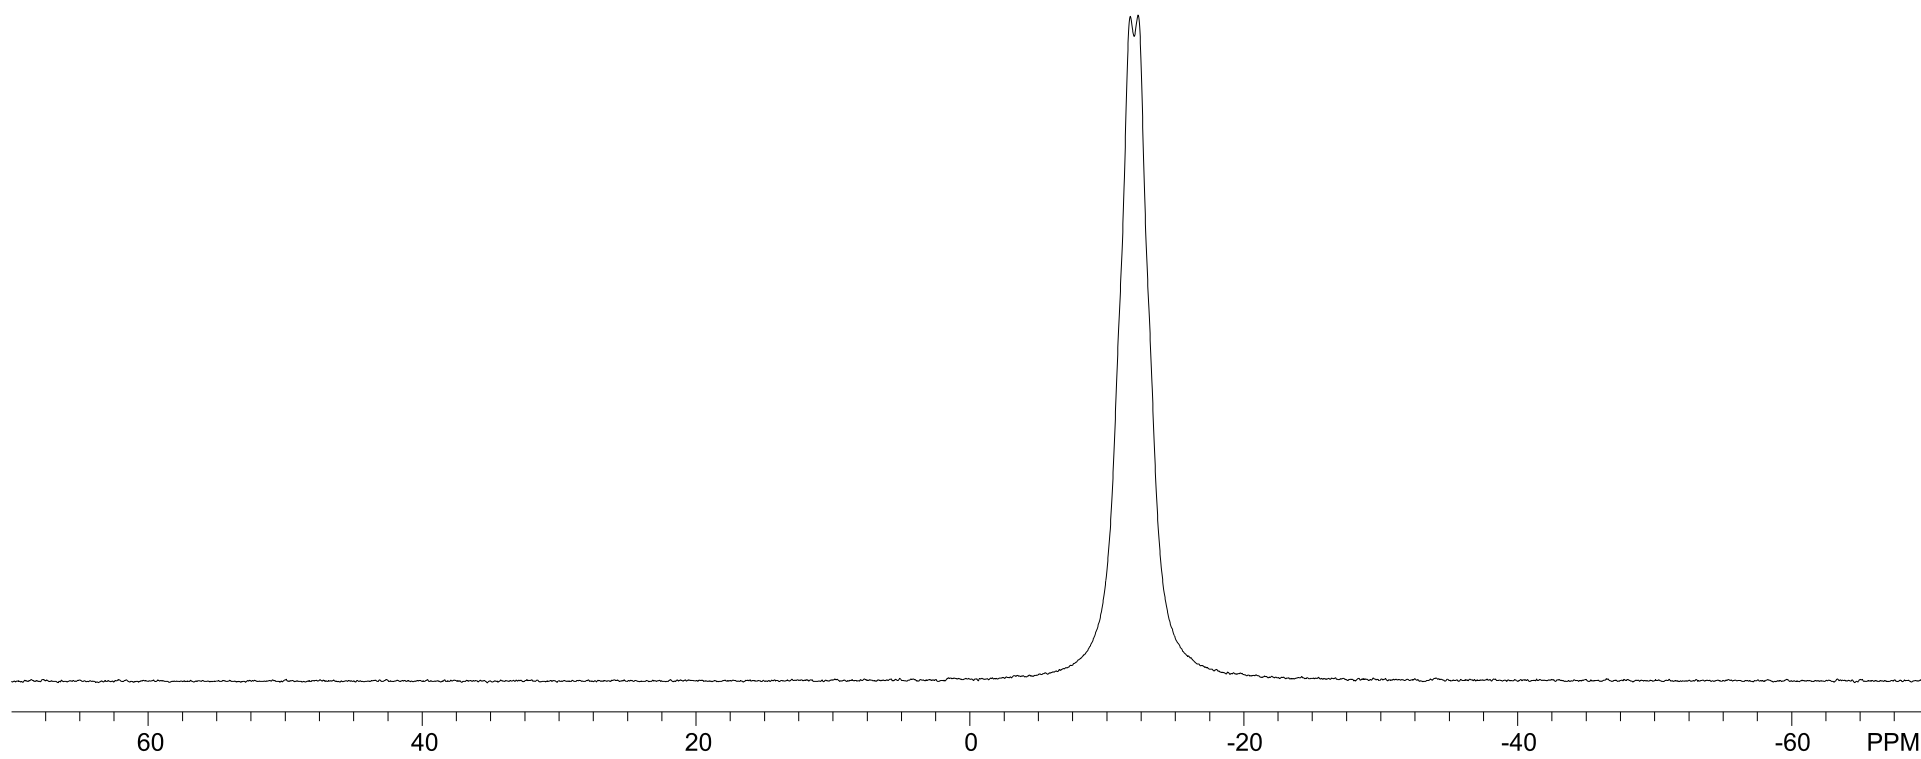

$^{11}\text{B}\{^1\text{H}\}$  NMR (128 MHz),  
 $\text{CDCl}_3$

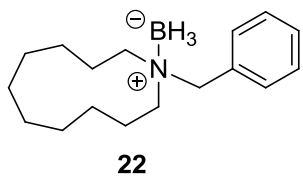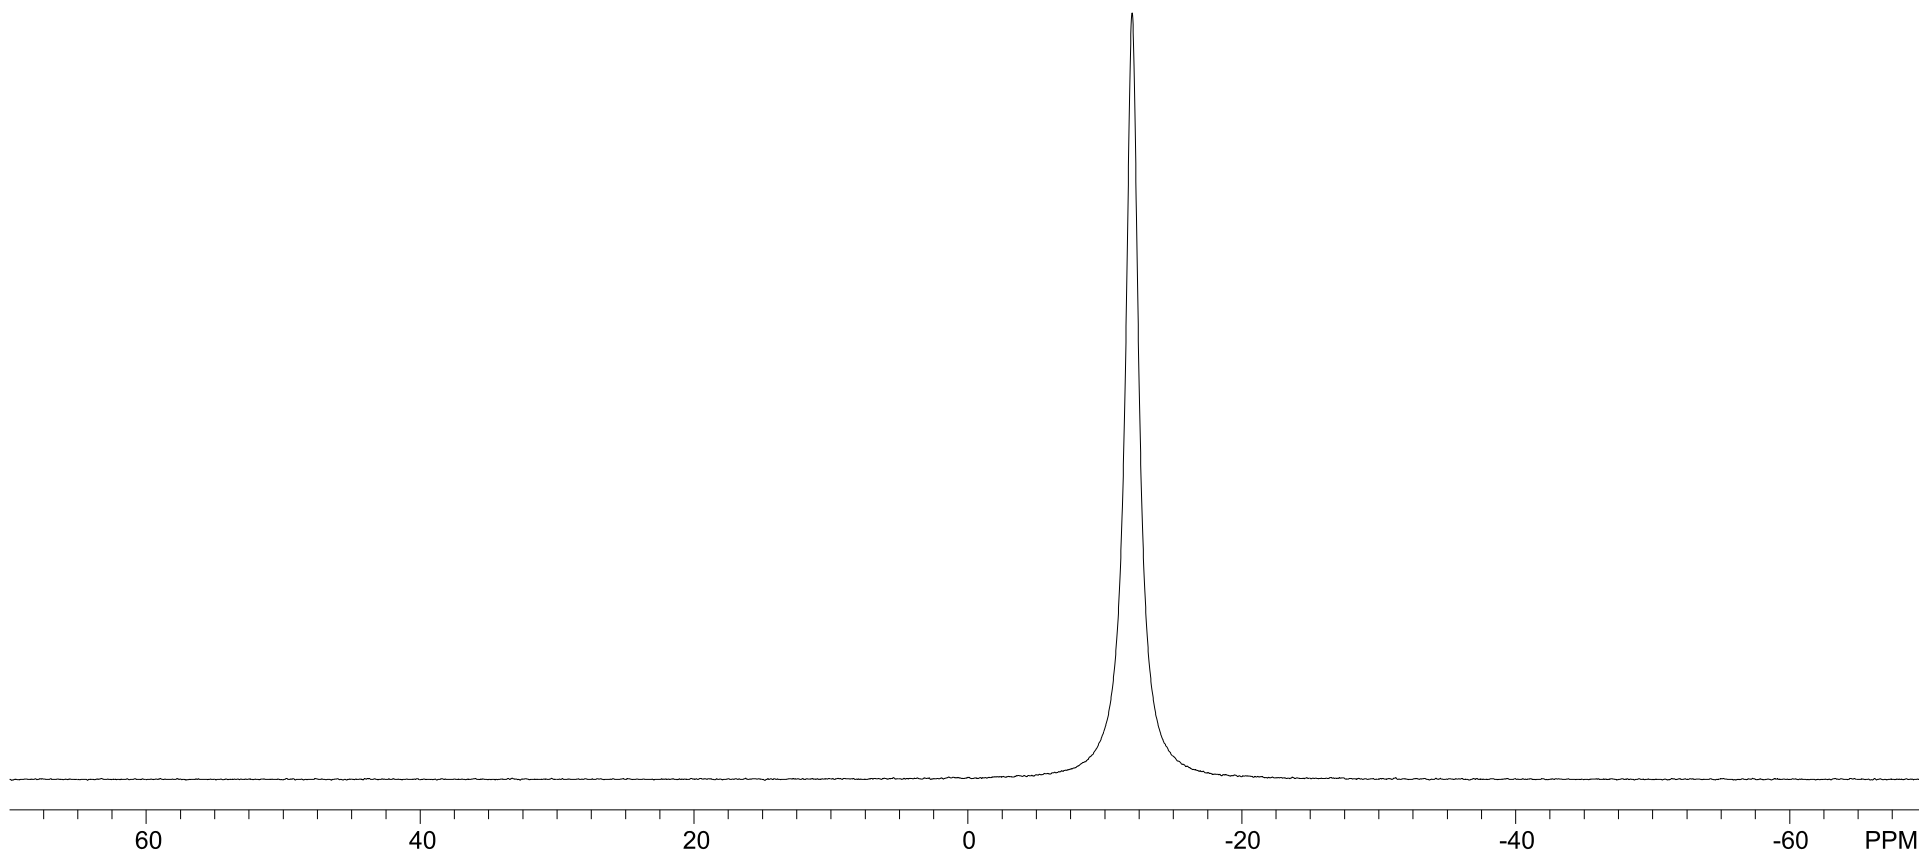

$^{13}\text{C}\{^1\text{H}\}$  NMR (126 MHz),  
 $\text{CDCl}_3$

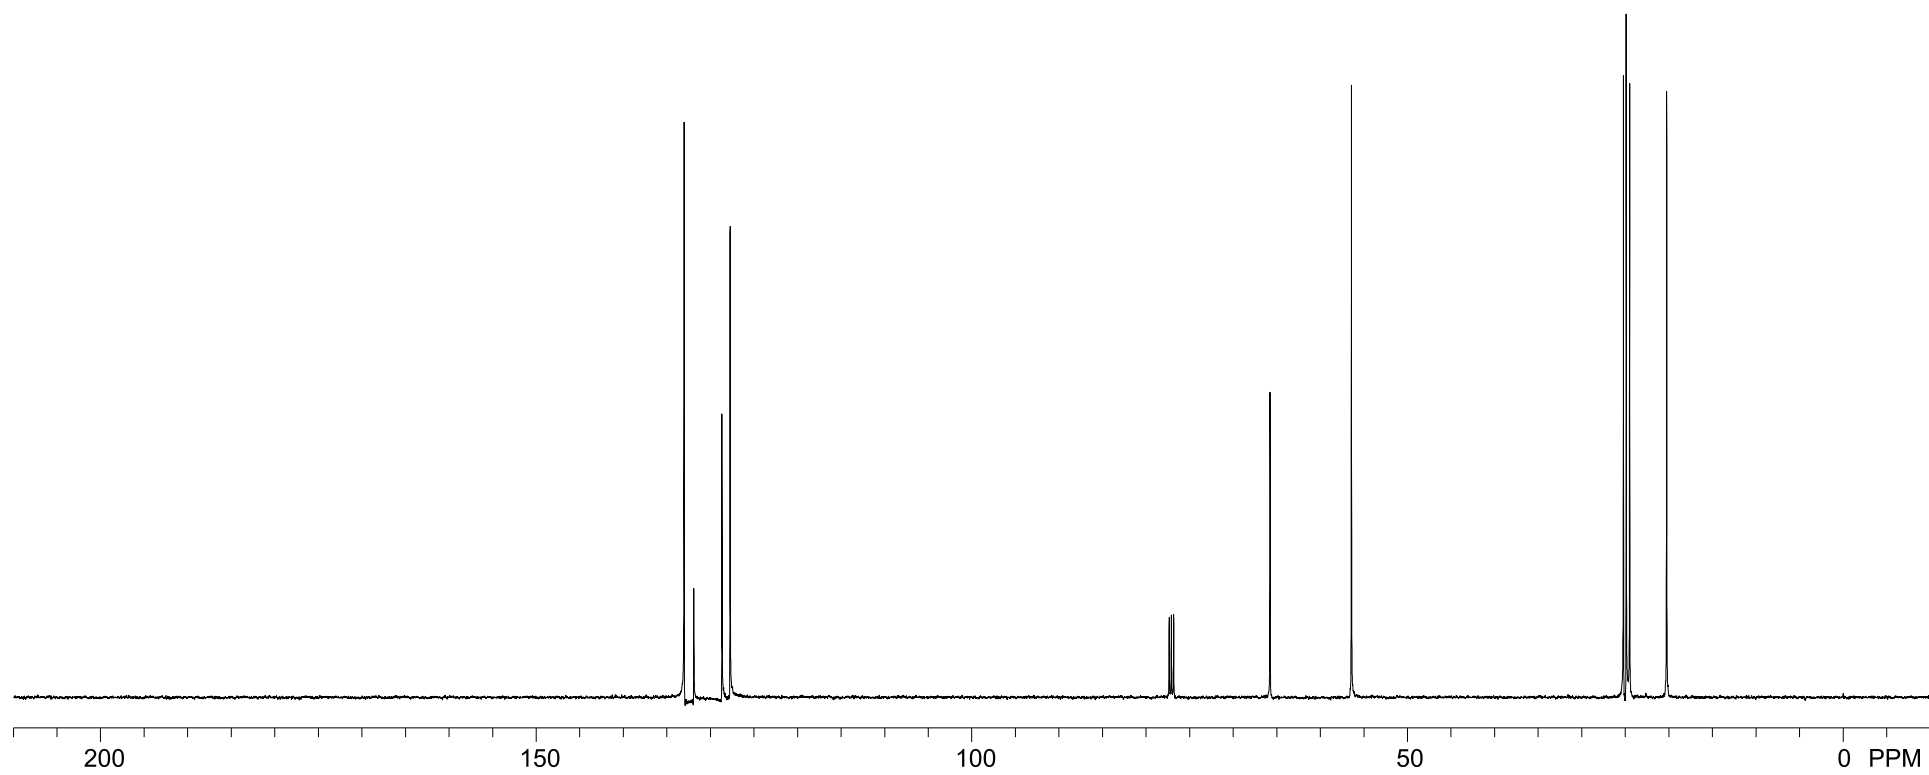

$^1\text{H}$  NMR (500 MHz),  
 $\text{CDCl}_3$

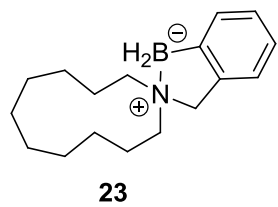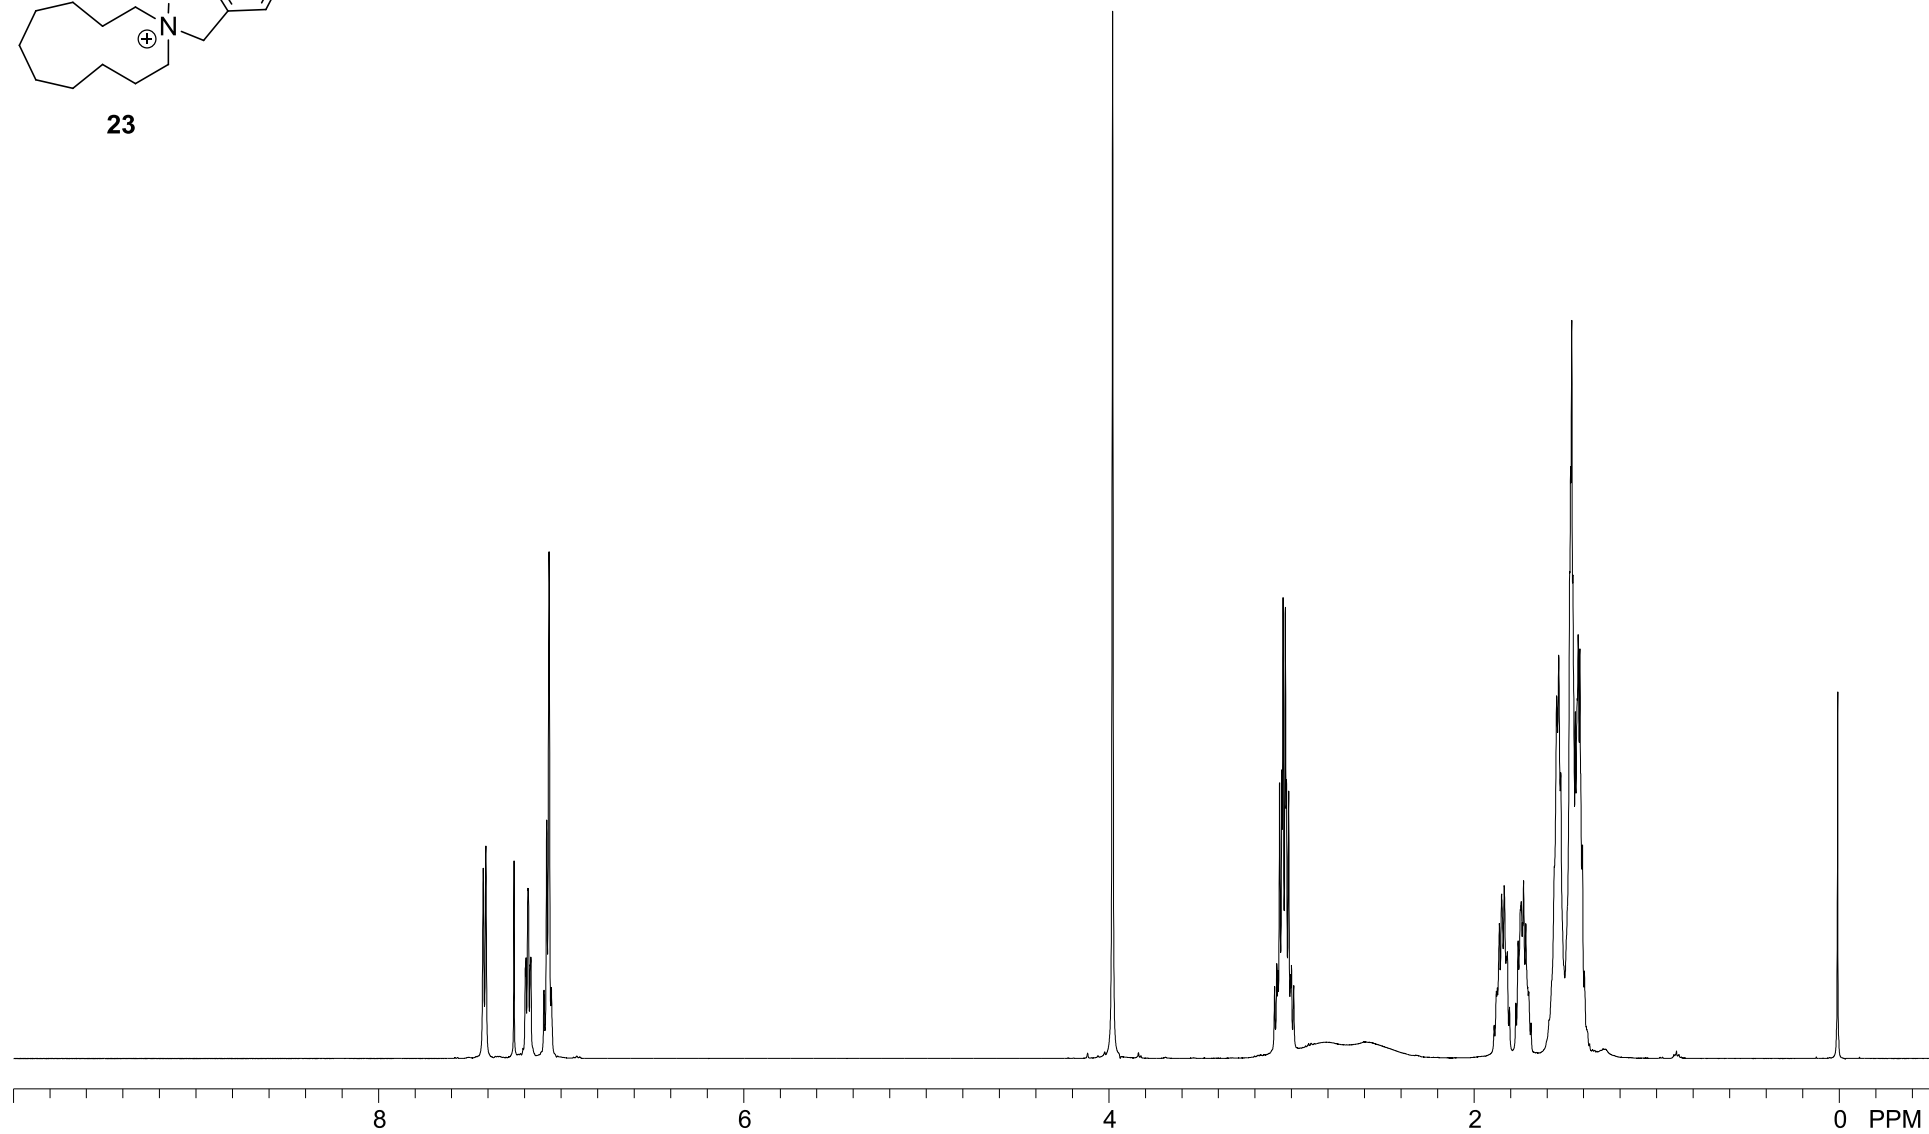

$^{11}\text{B}$  NMR (128 MHz),  
 $\text{CDCl}_3$

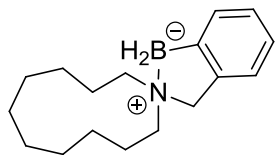

**23**

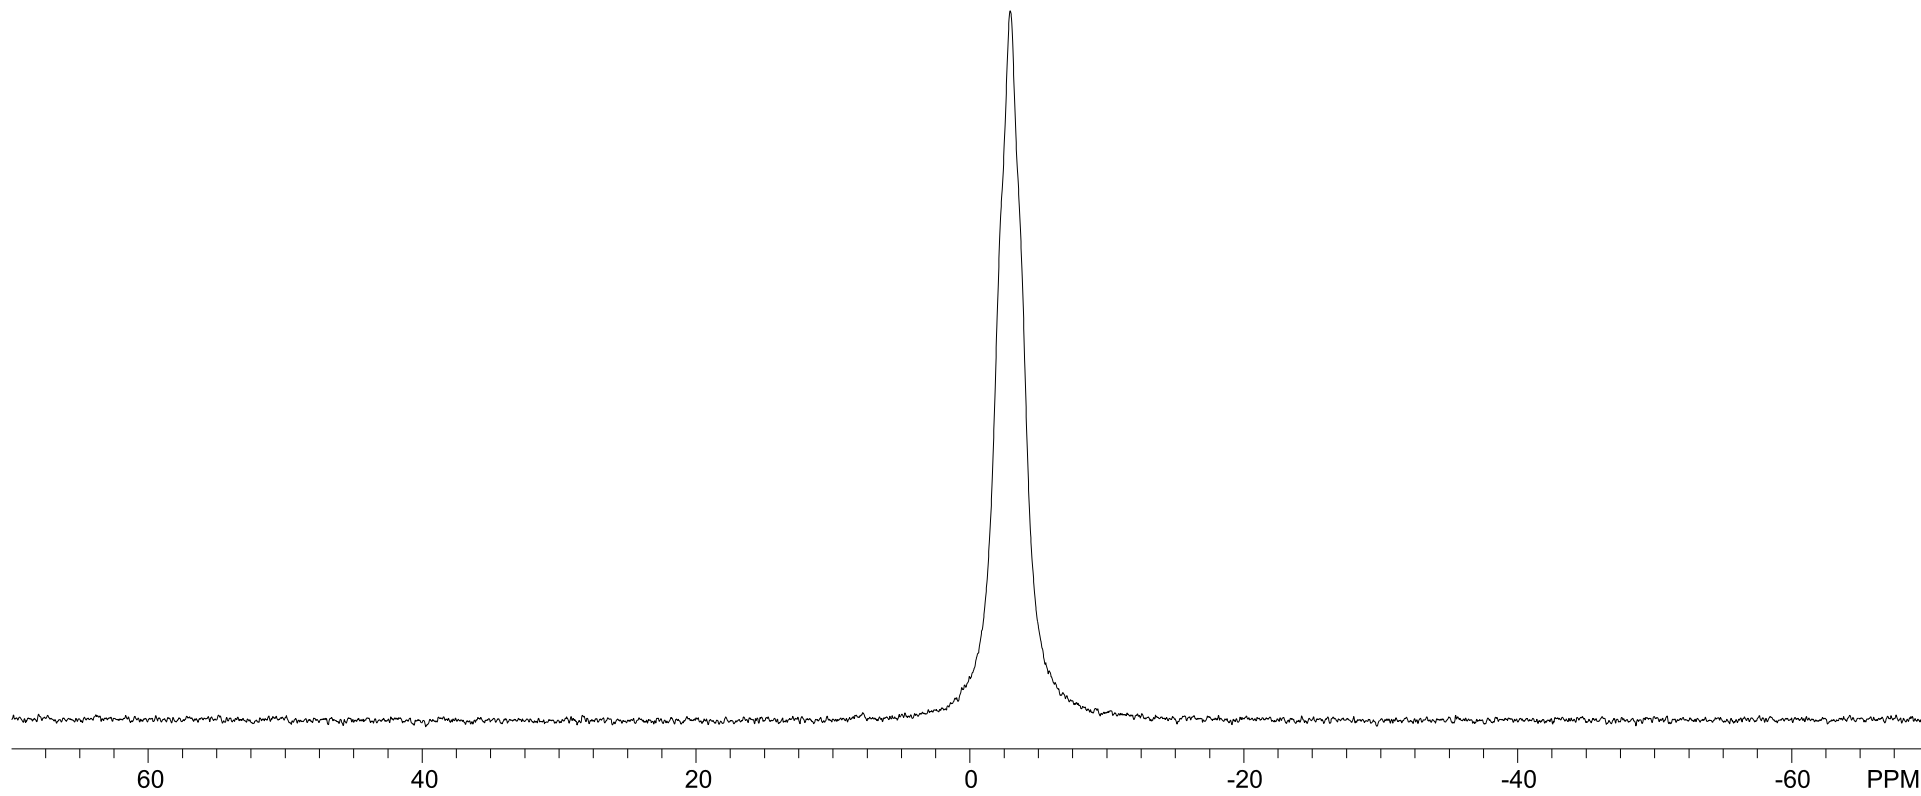

$^{11}\text{B}\{^1\text{H}\}$  NMR (128 MHz),  
 $\text{CDCl}_3$



**23**

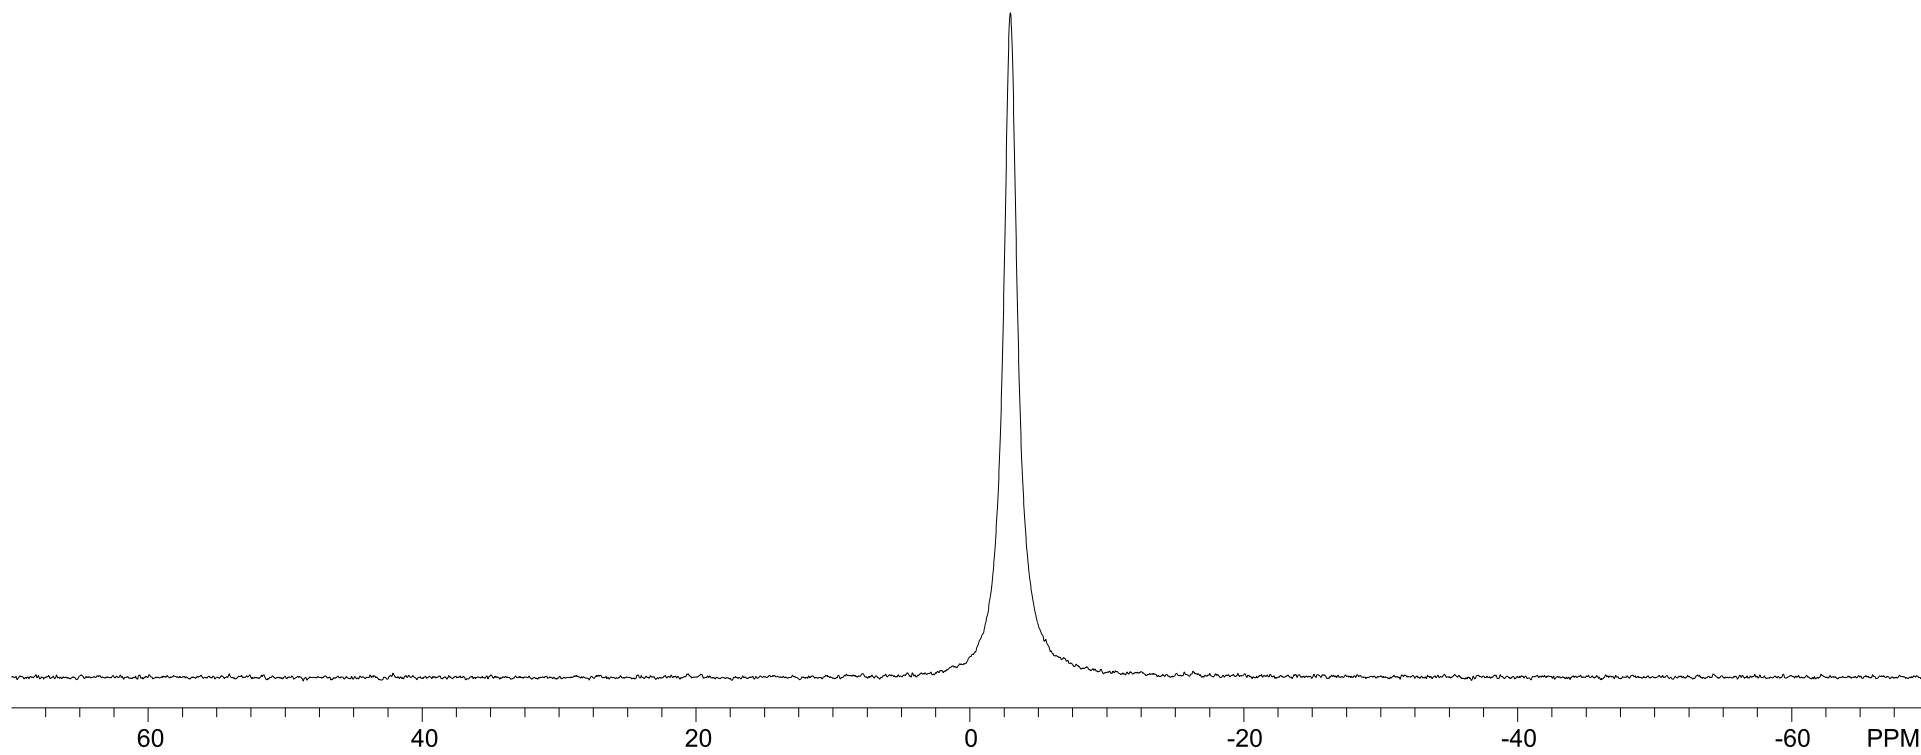

$^{13}\text{C}\{^1\text{H}\}$  NMR (126 MHz),  
 $\text{CDCl}_3$



**23**

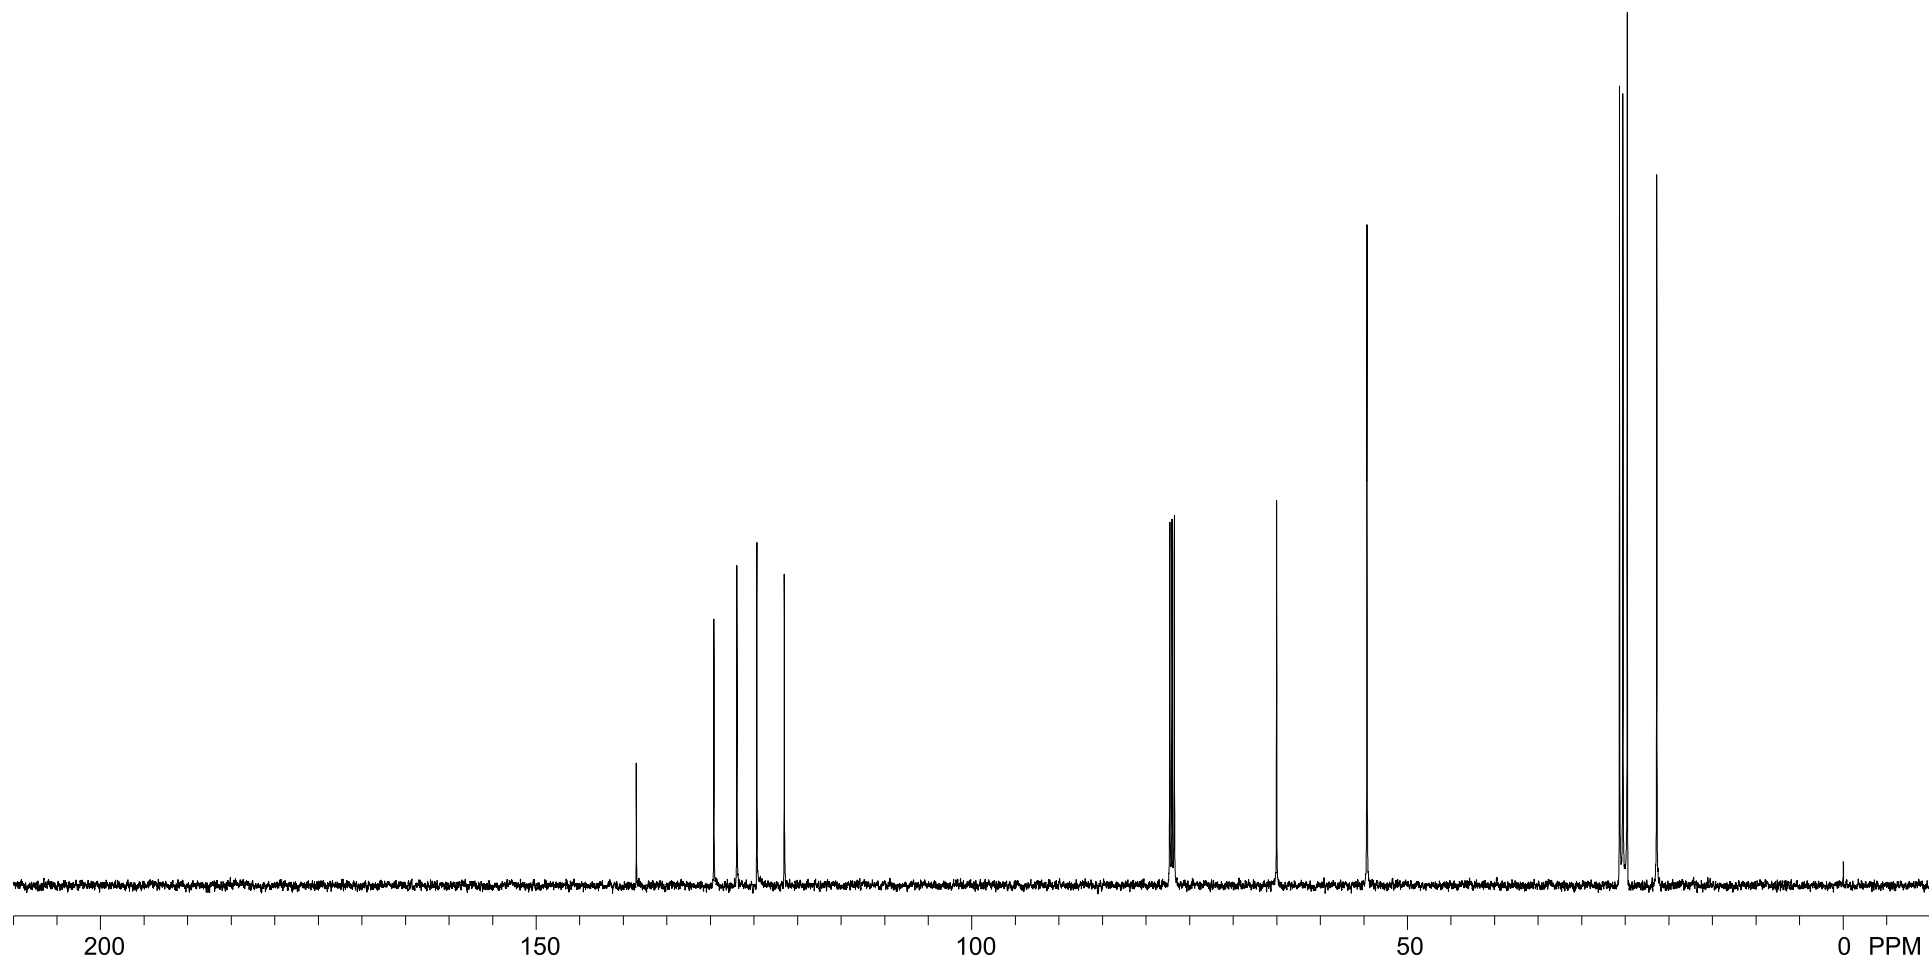



$^1\text{H}$  NMR (700 MHz),  
 $\text{CDCl}_3$

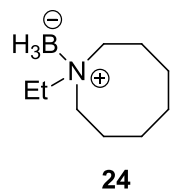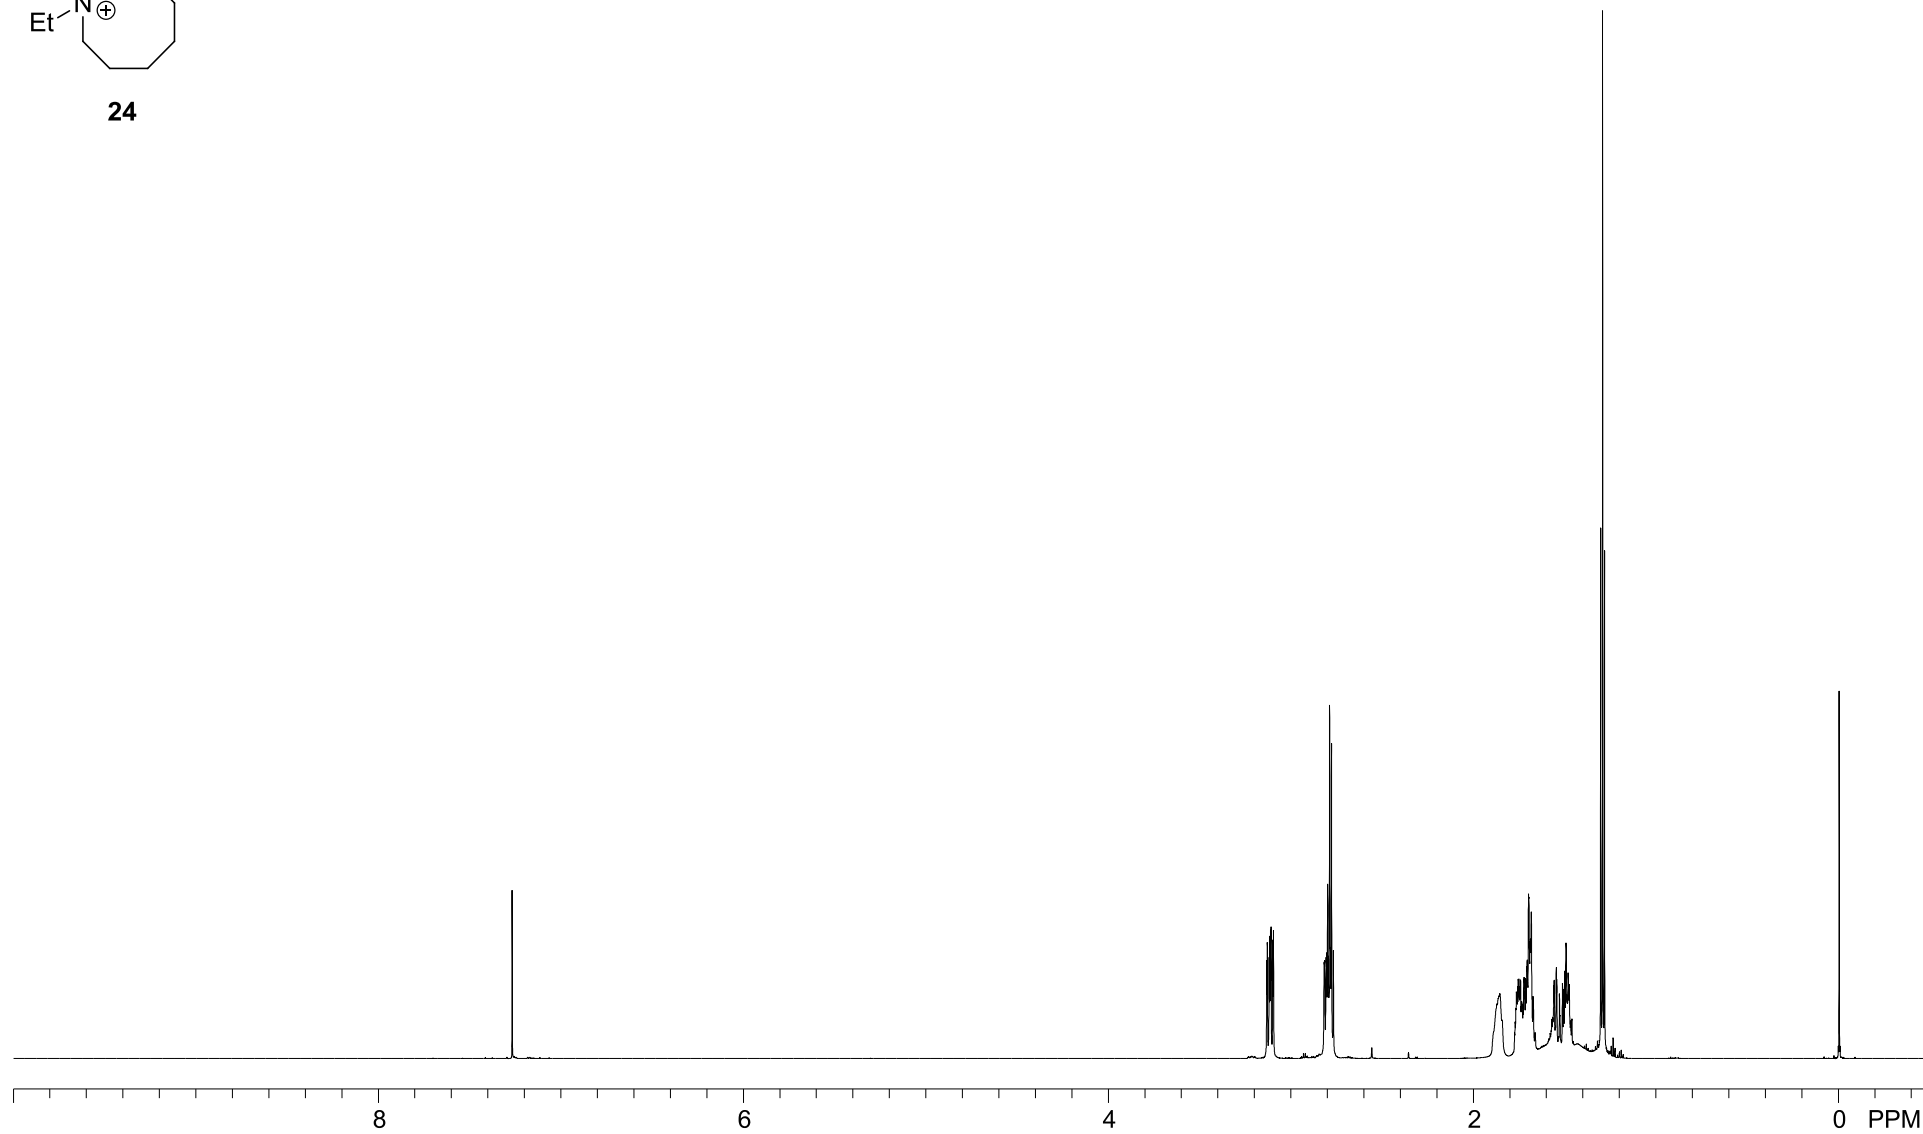

$^{11}\text{B}$  NMR (128 MHz),  
 $\text{CDCl}_3$

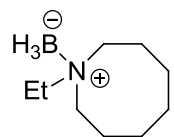

**24**

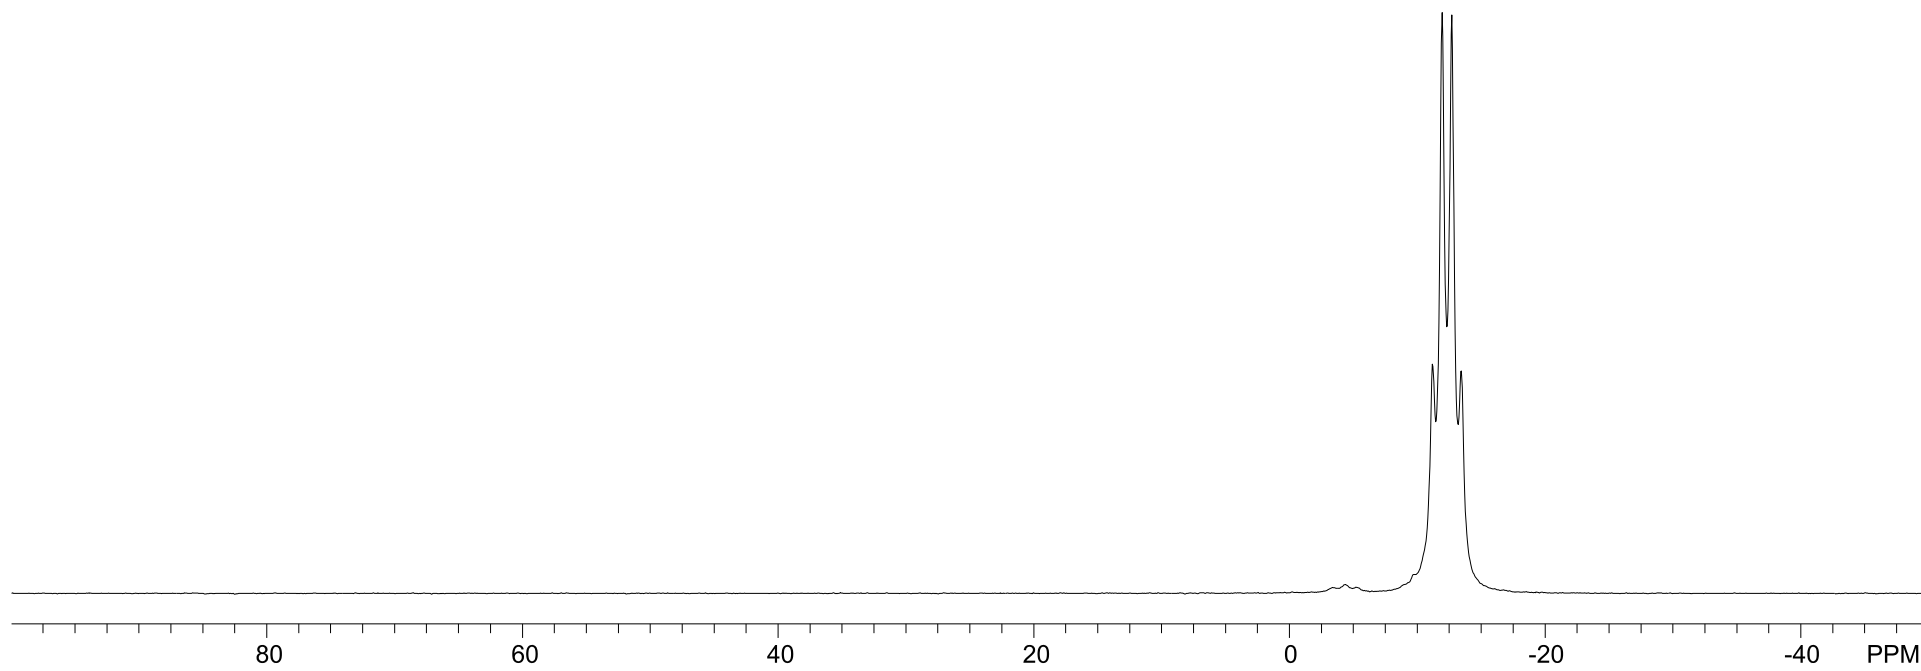

$^{11}\text{B}\{^1\text{H}\}$  NMR (128 MHz),  
 $\text{CDCl}_3$



**24**

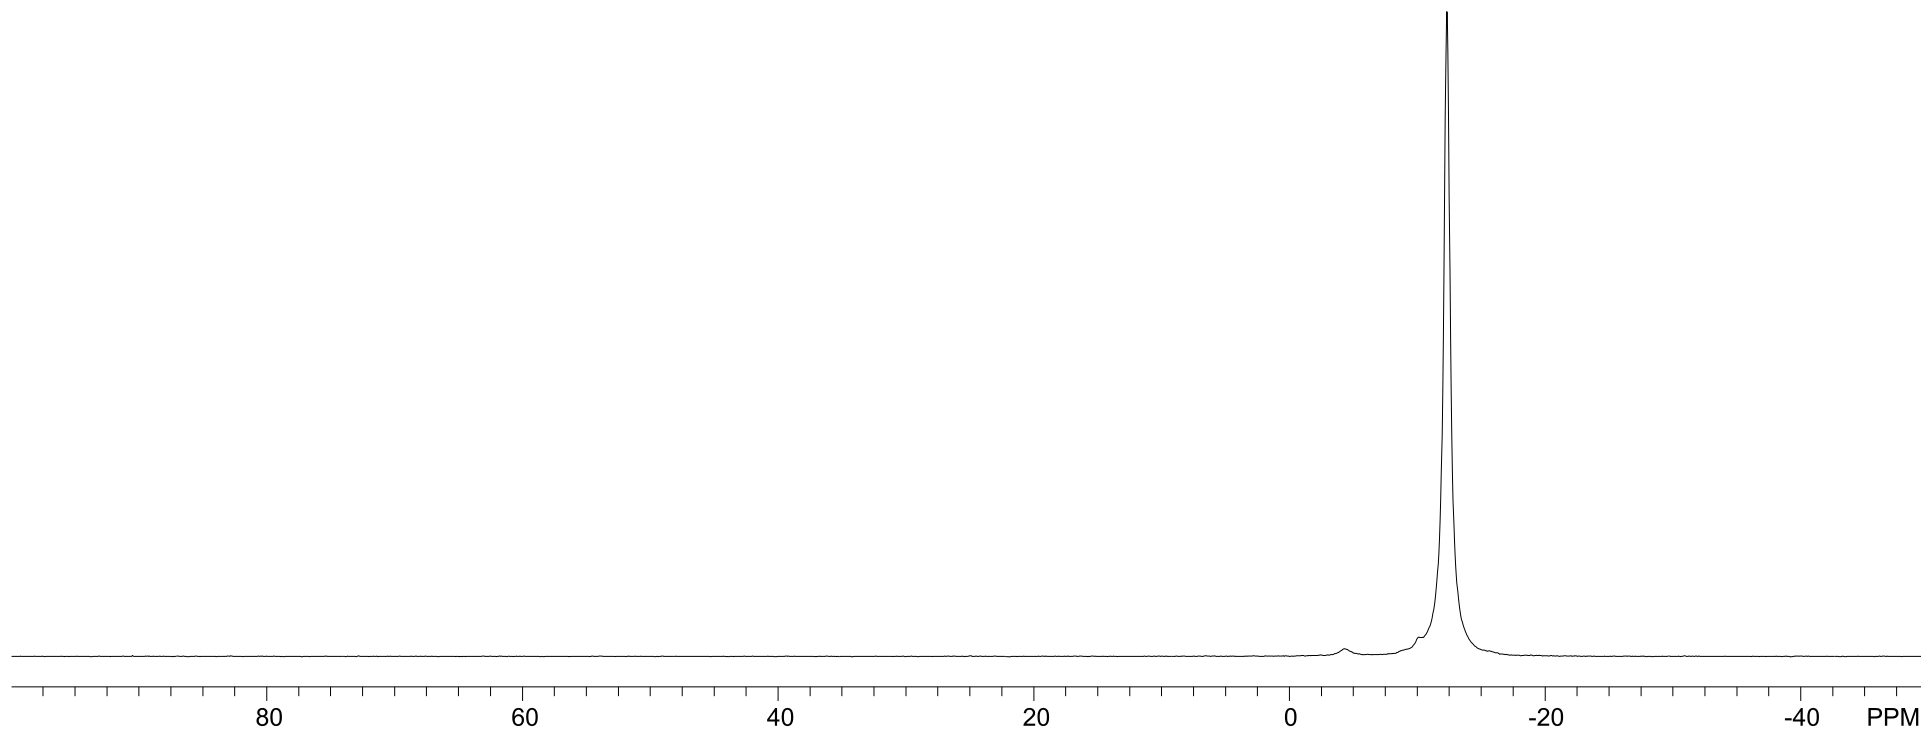

$^{13}\text{C}\{^1\text{H}\}$  NMR (101 MHz),  
 $\text{CDCl}_3$

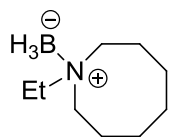

**24**

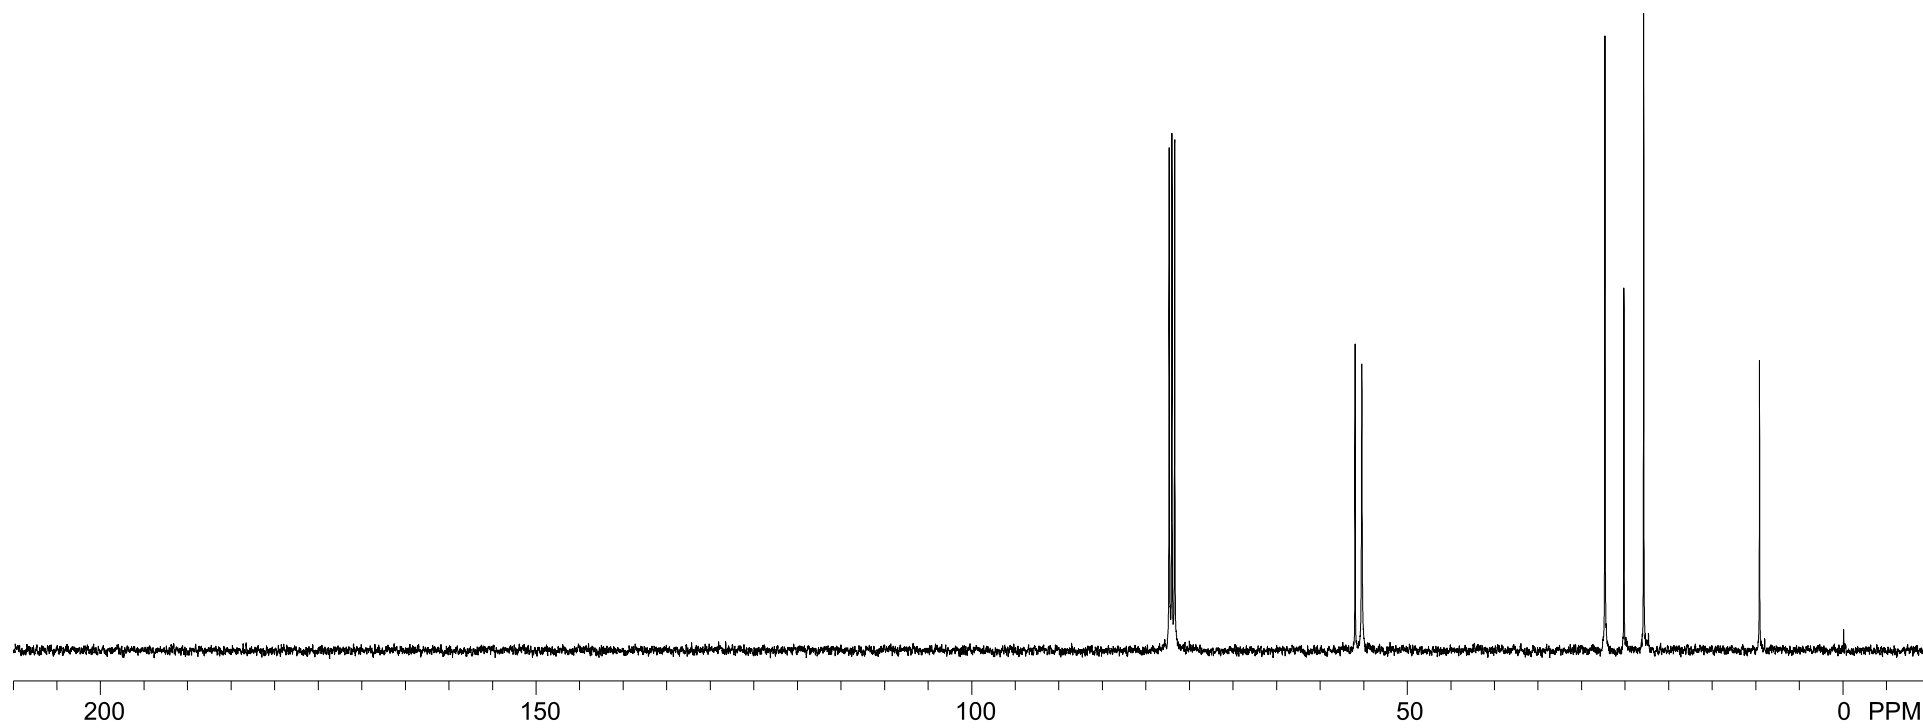

$^1\text{H}$  NMR (700 MHz),  
 $\text{CDCl}_3$

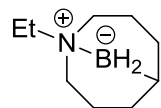

**25**

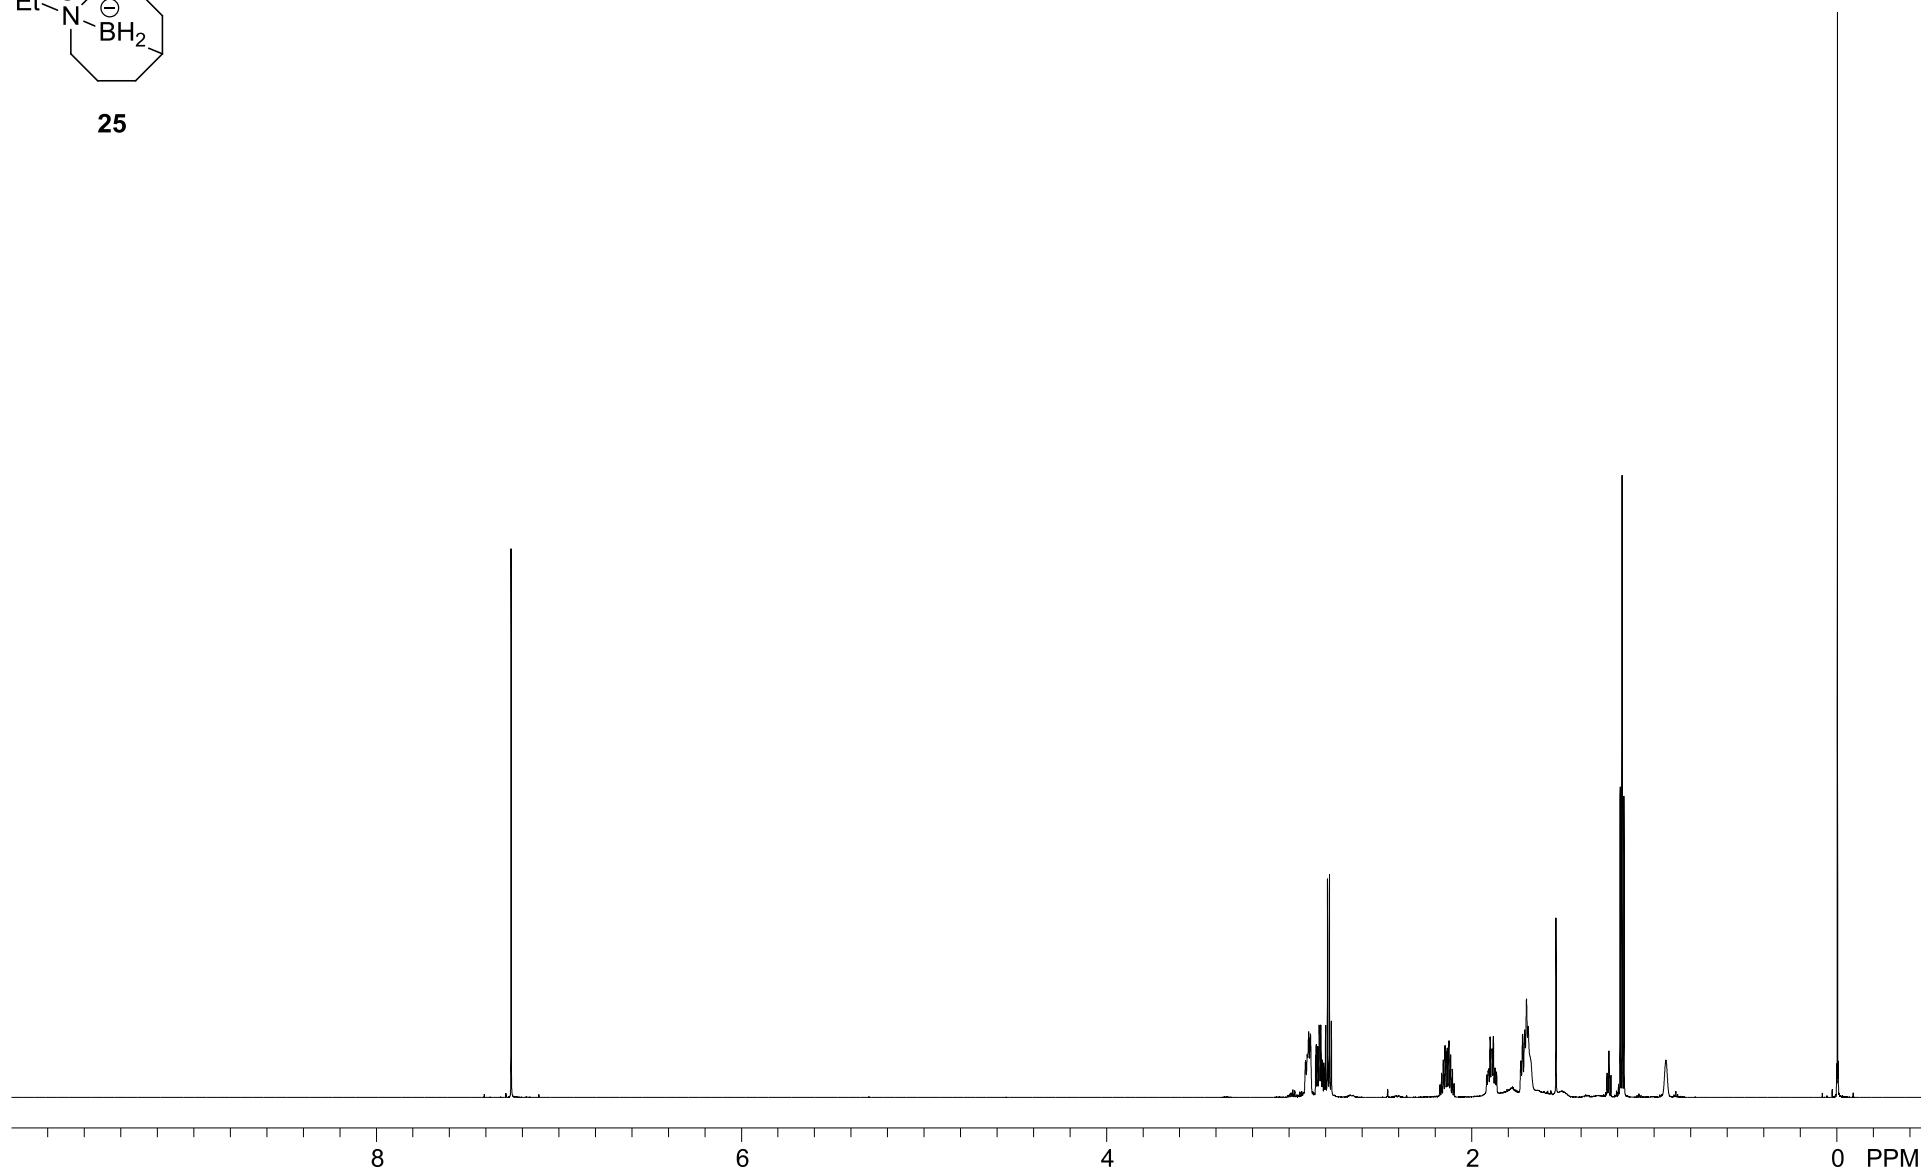

$^{11}\text{B}$  NMR (160 MHz),  
 $\text{CDCl}_3$



**25**

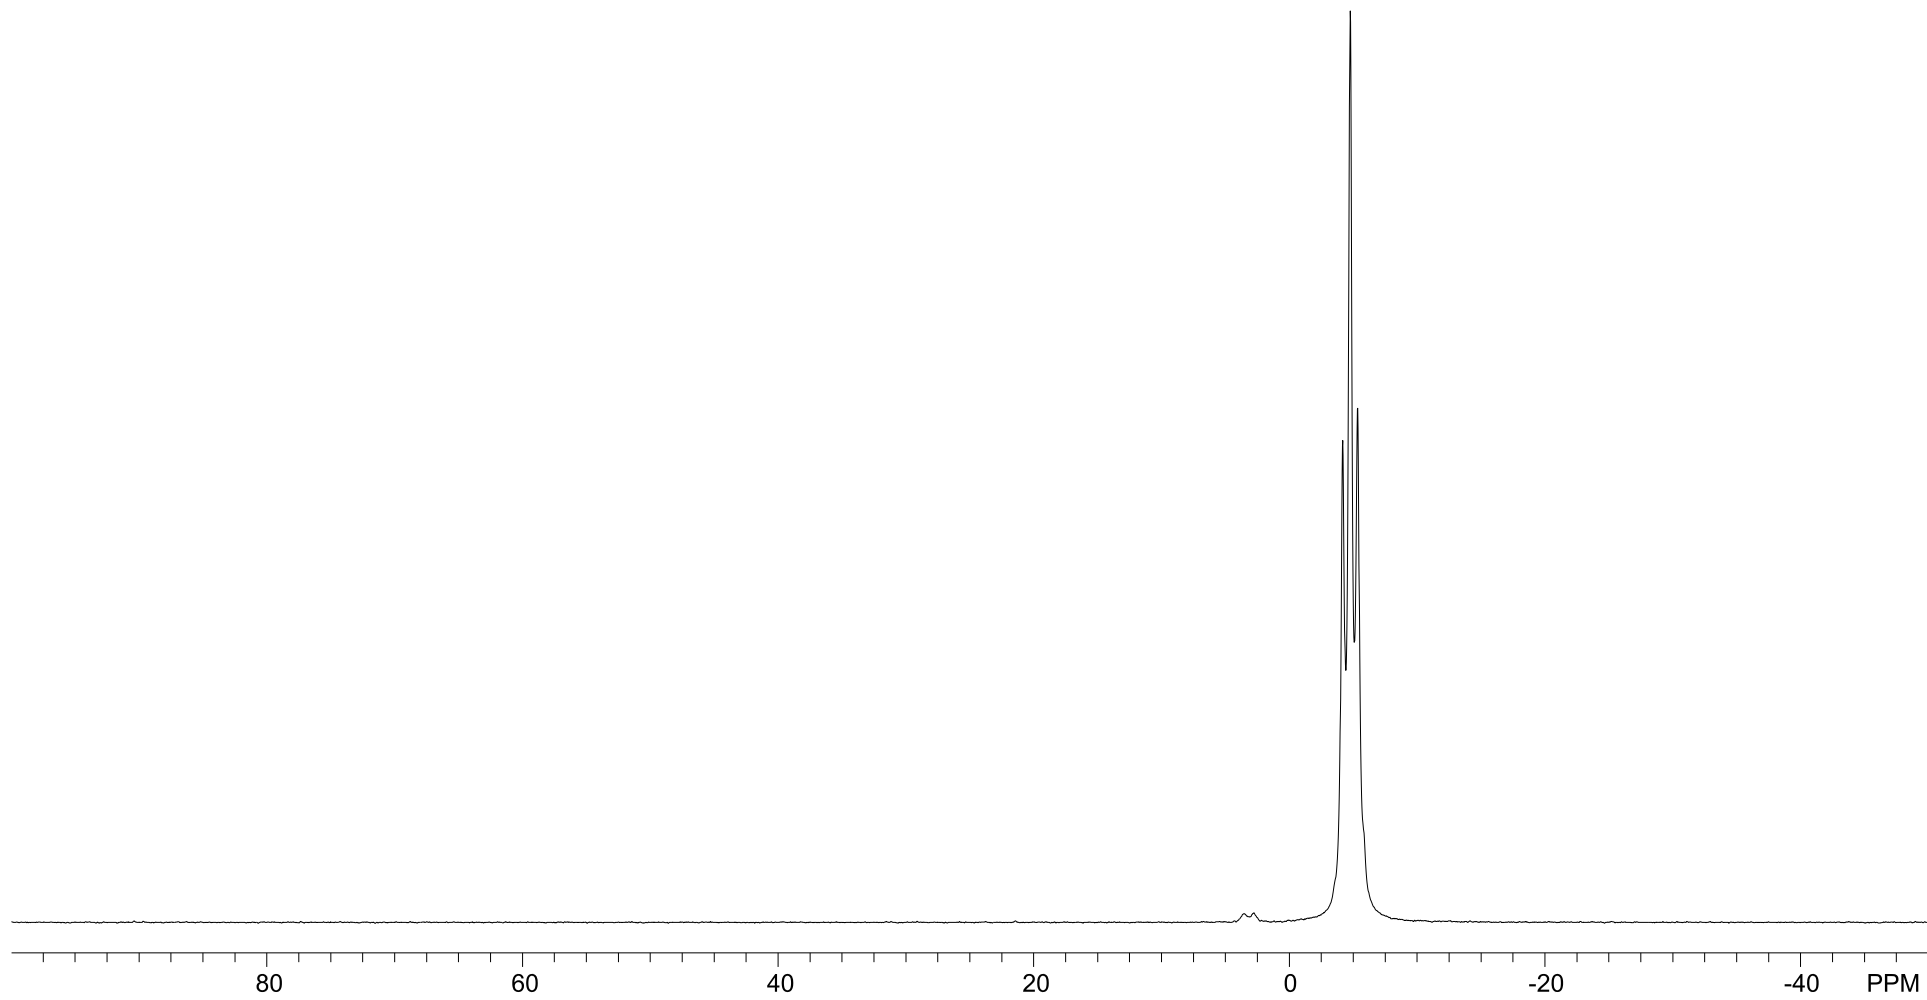

$^{11}\text{B}\{^1\text{H}\}$  NMR (160 MHz),  
 $\text{CDCl}_3$



**25**

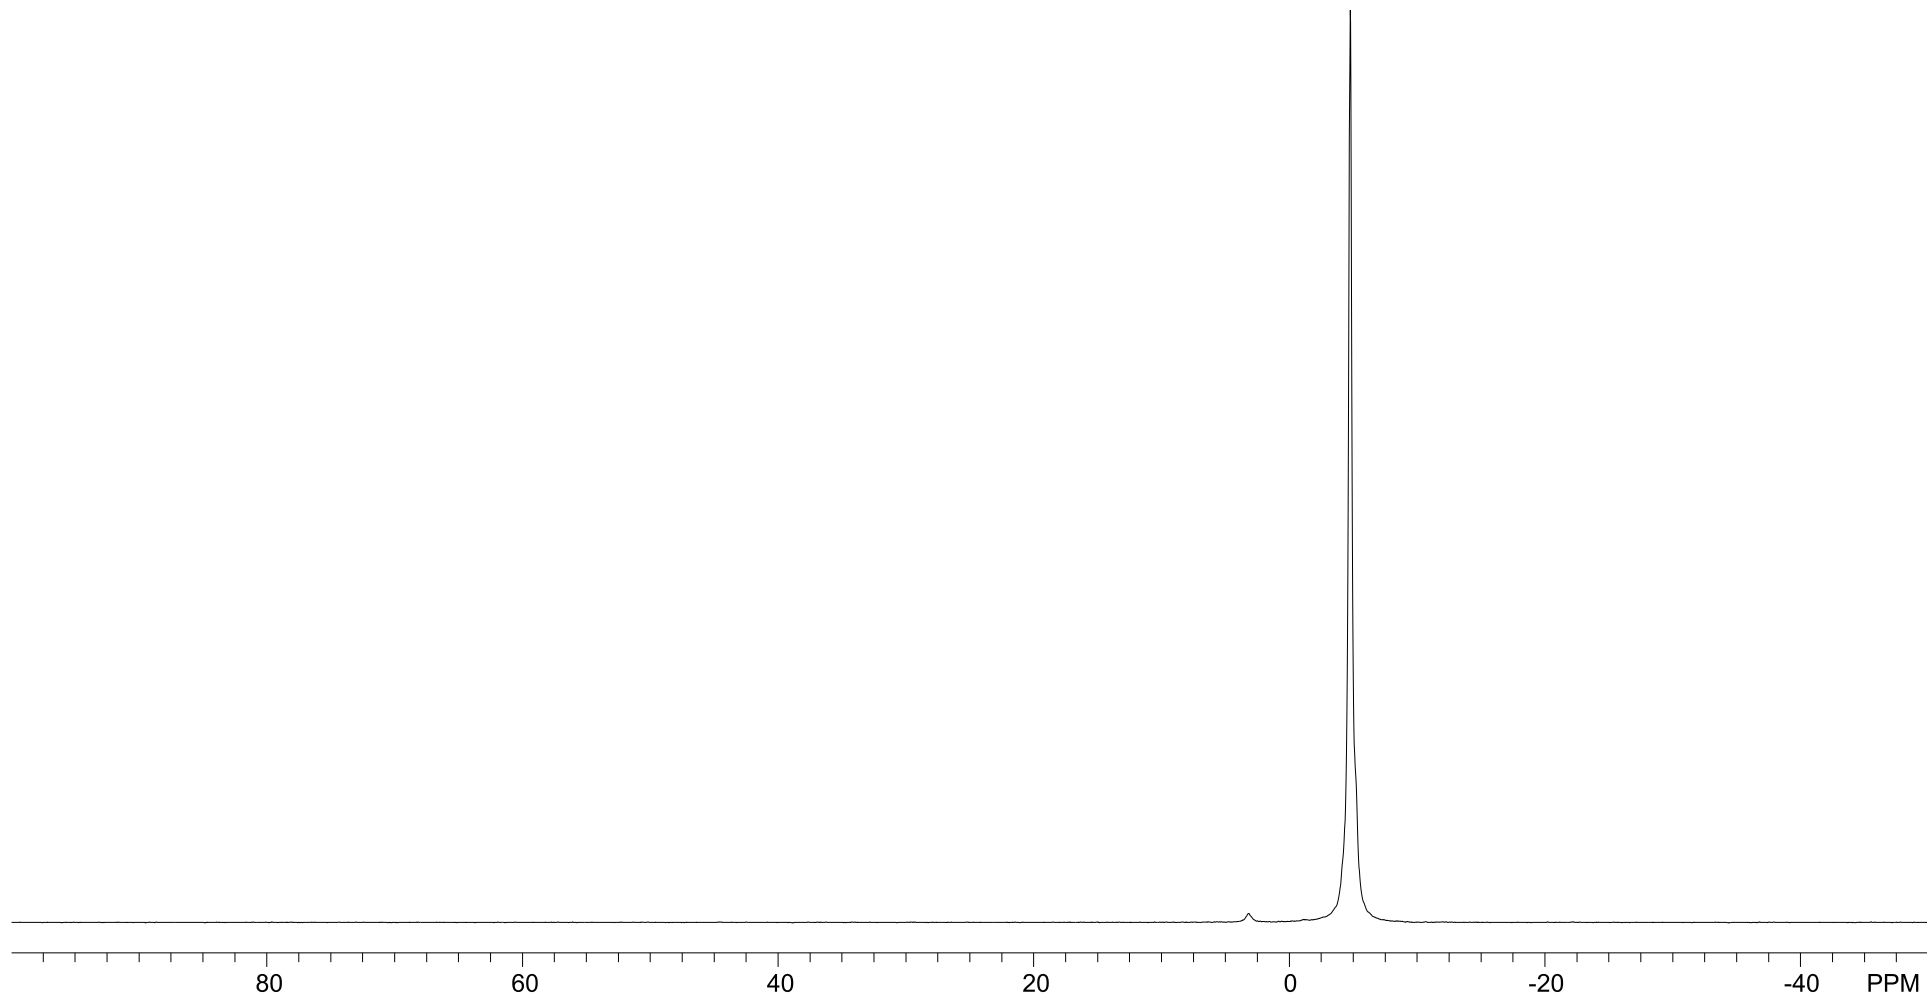

$^{13}\text{C}\{^1\text{H}\}$  NMR (126 MHz),  
 $\text{CDCl}_3$



**25**

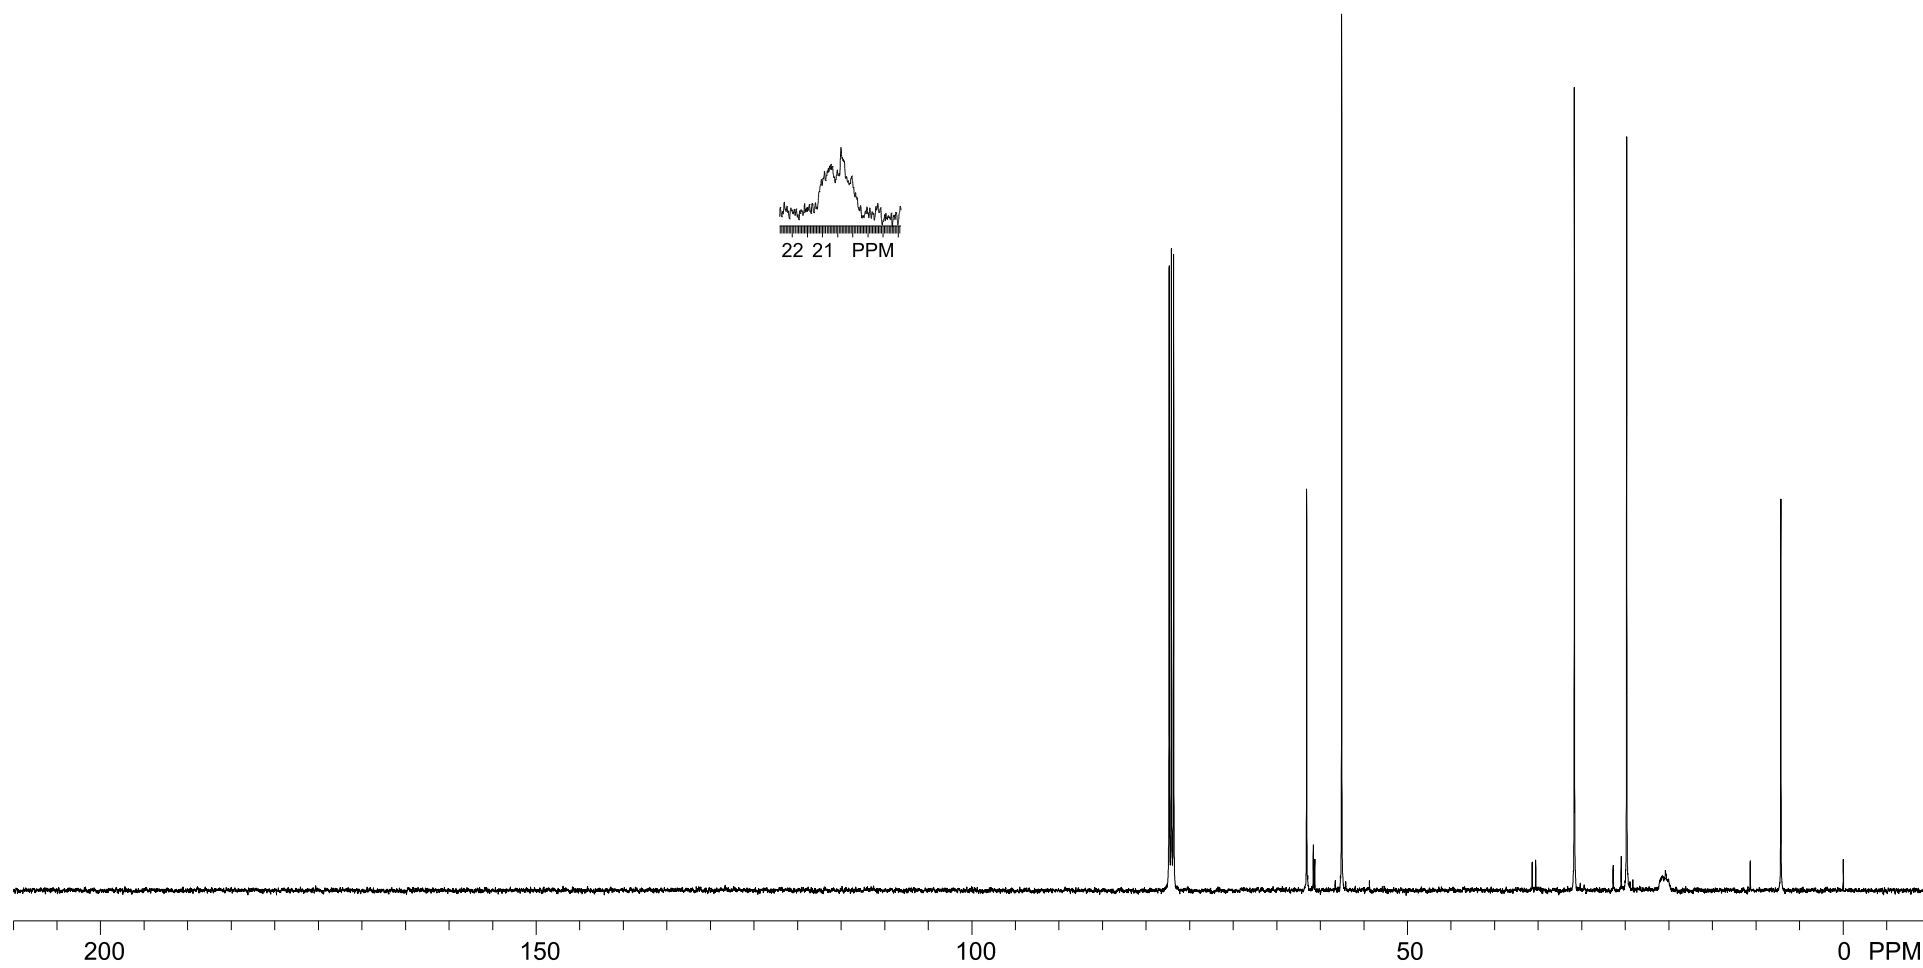



$^1\text{H}$  NMR (500 MHz),  
 $\text{CDCl}_3$

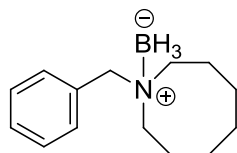

**27**

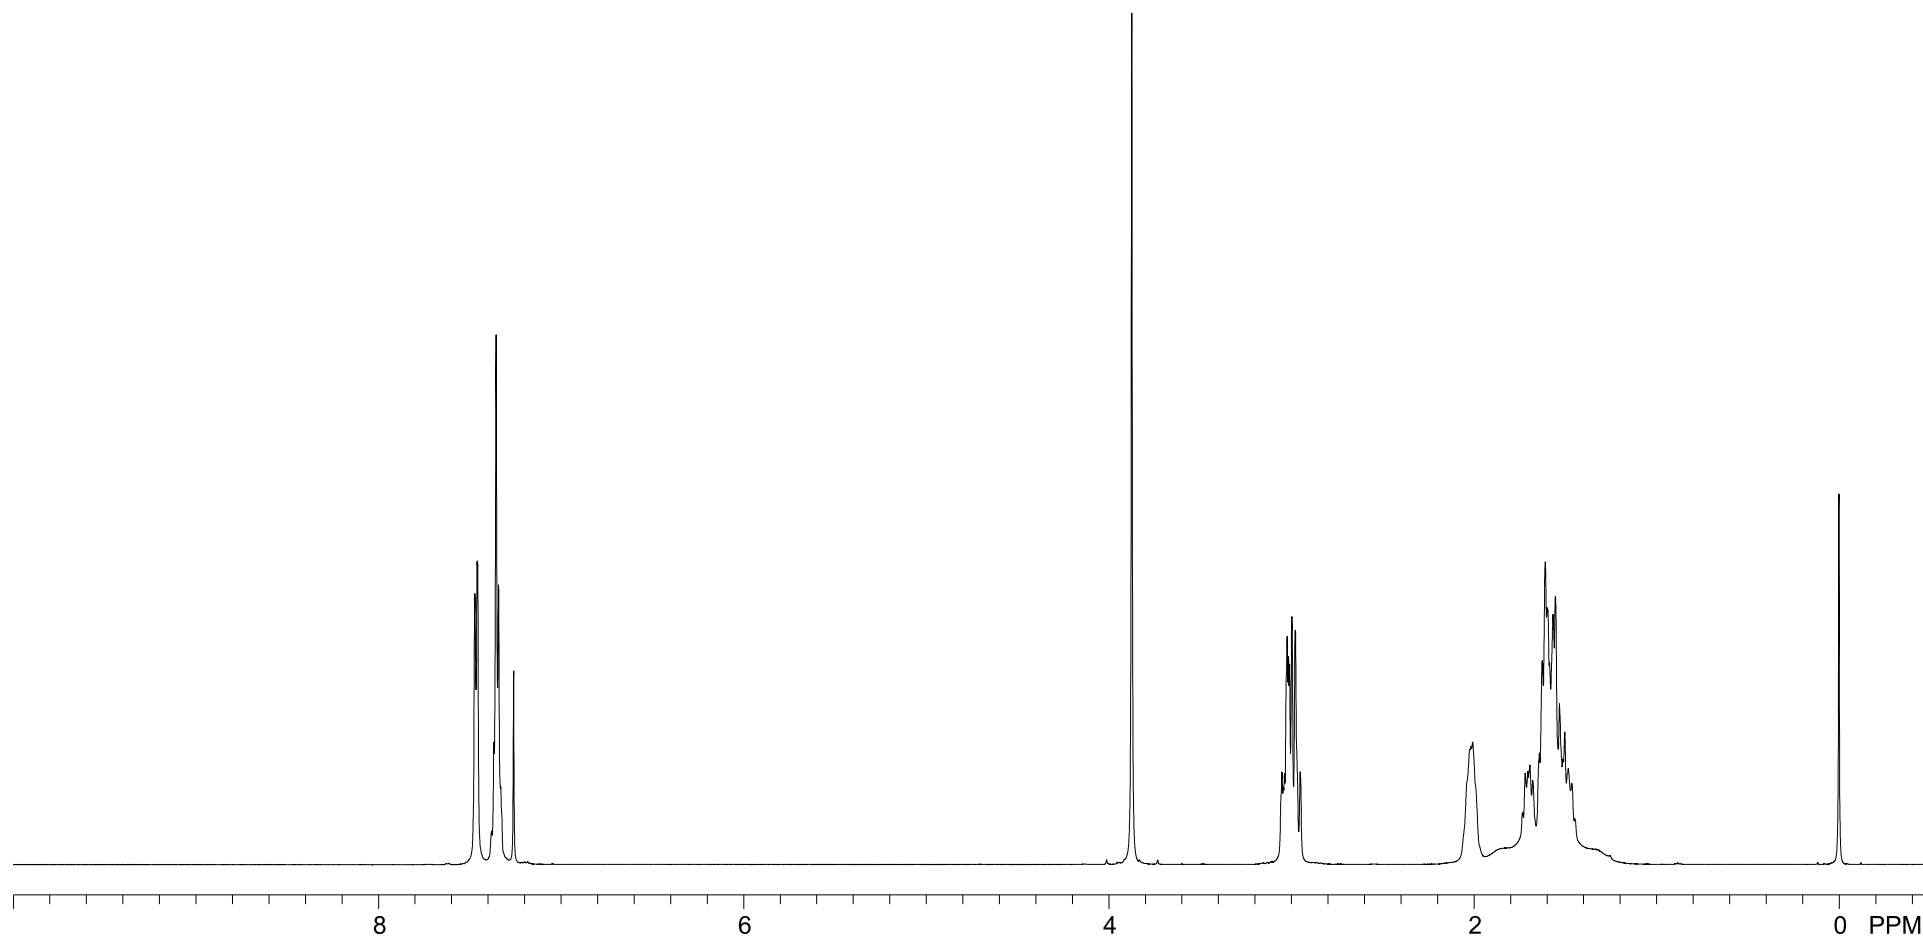

$^{11}\text{B}$  NMR (128 MHz),  
 $\text{CDCl}_3$



**27**

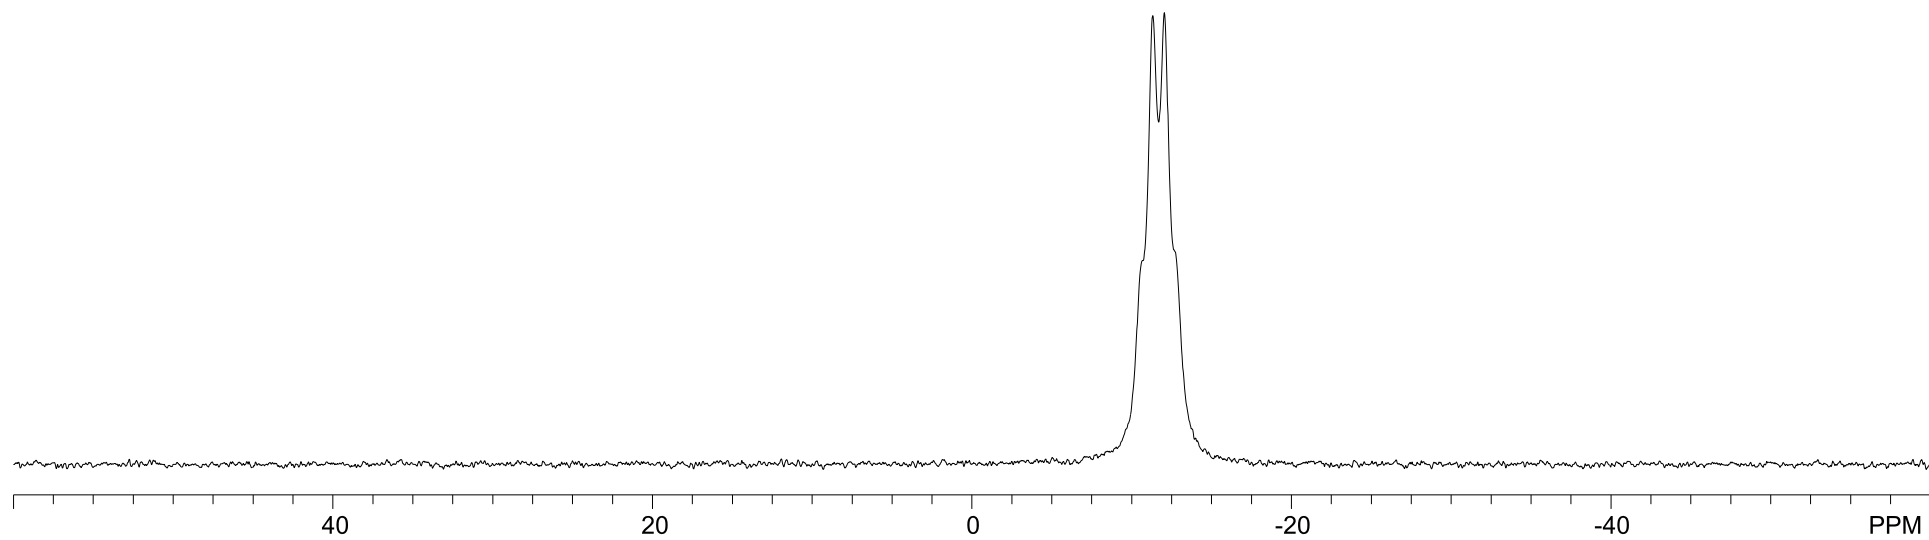

$^{11}\text{B}\{^1\text{H}\}$  NMR (128 MHz),  
 $\text{CDCl}_3$



**27**

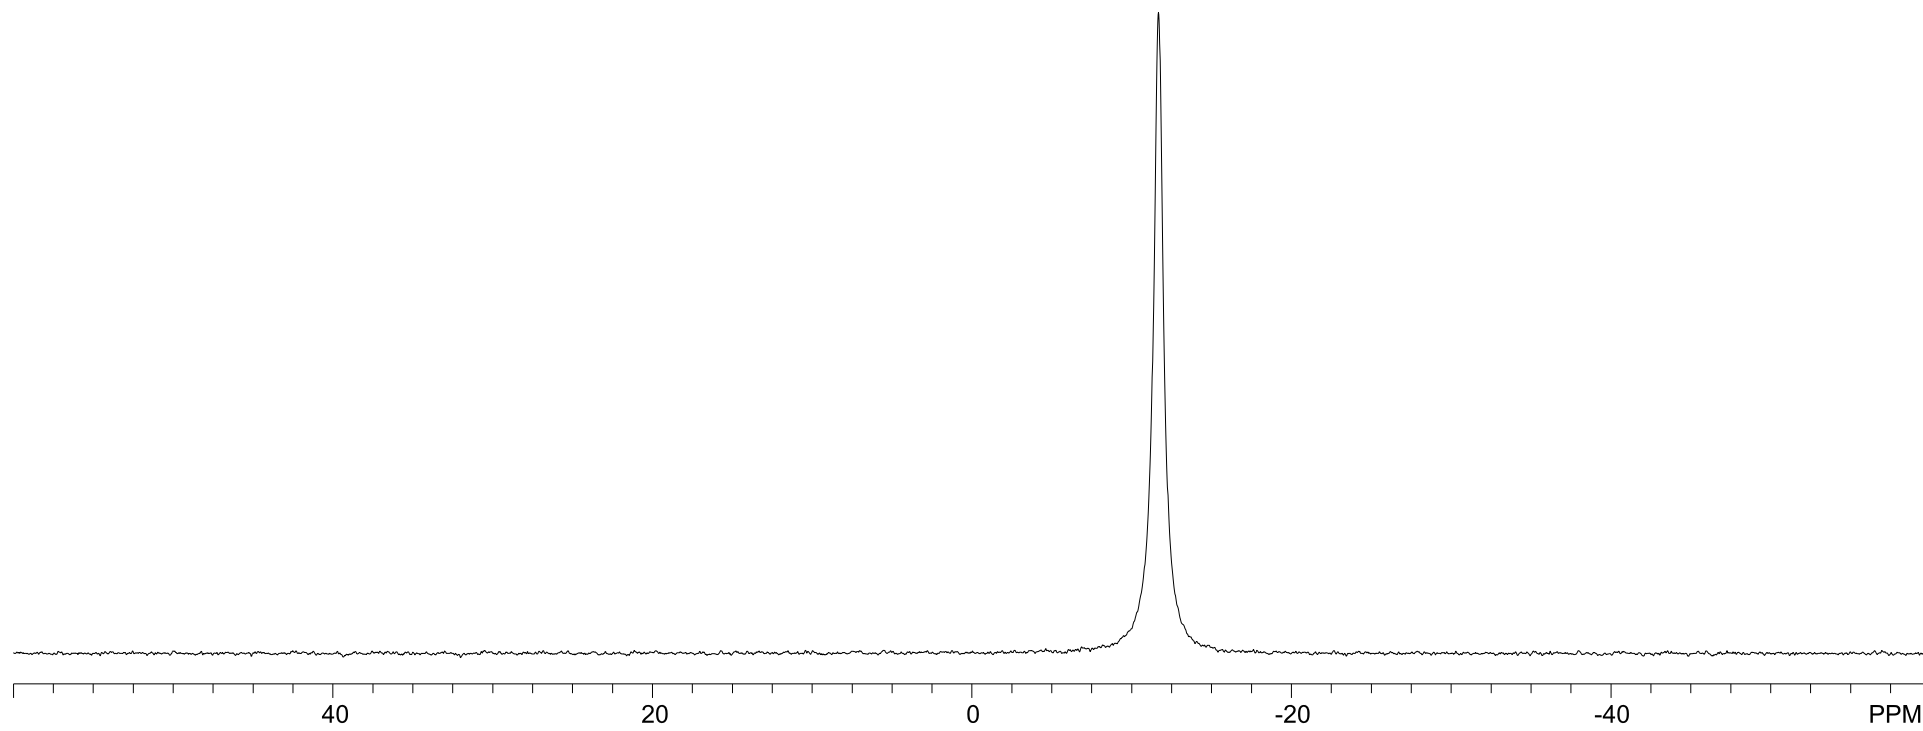

$^{13}\text{C}\{^1\text{H}\}$  NMR (126 MHz),  
 $\text{CDCl}_3$



27

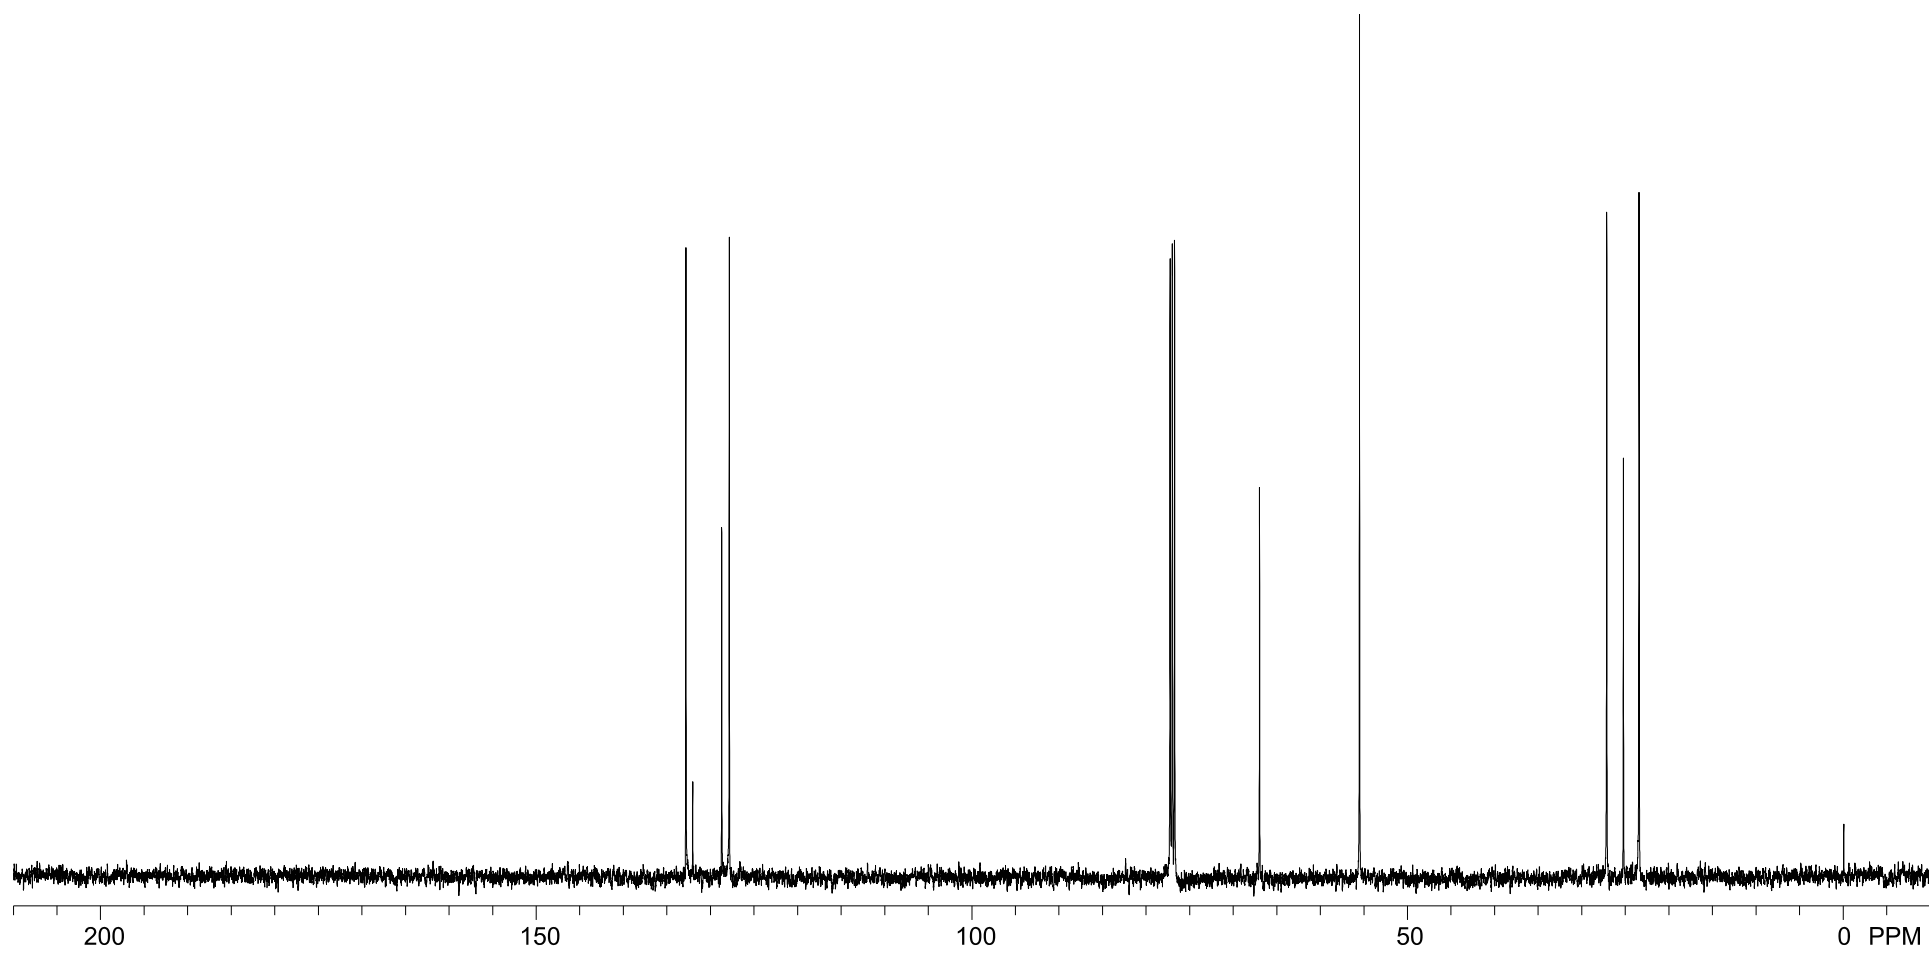

$^1\text{H}$  NMR (500 MHz),  
 $\text{CDCl}_3$

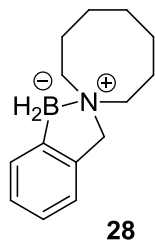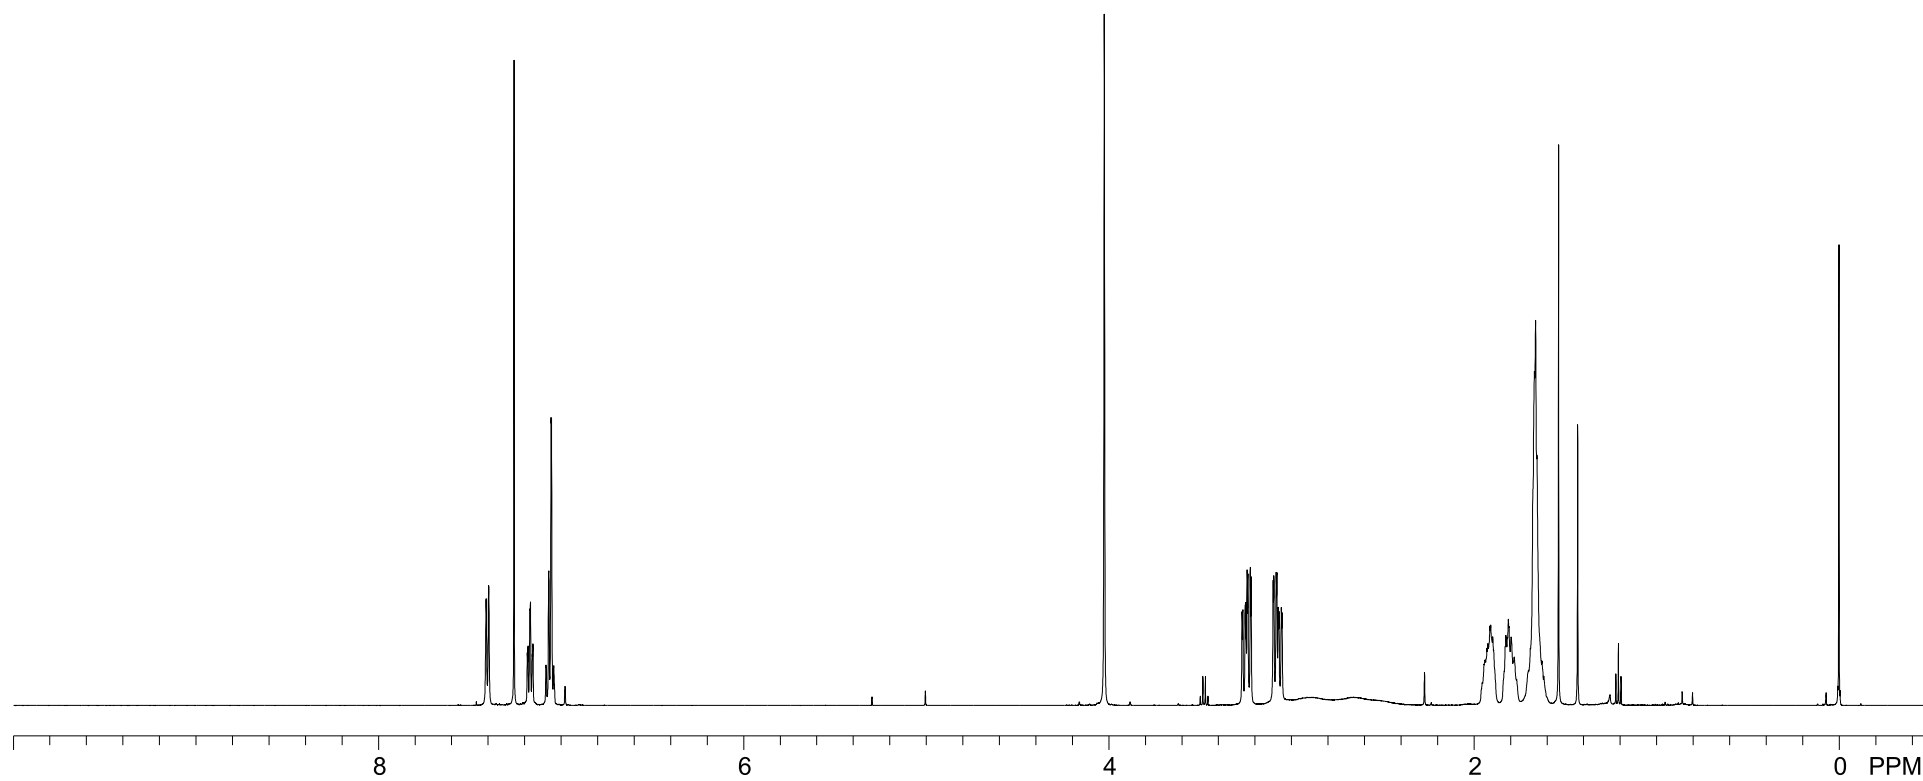

$^{11}\text{B}$  NMR (128 MHz),  
 $\text{CDCl}_3$

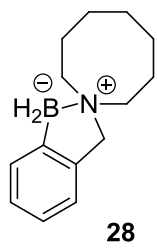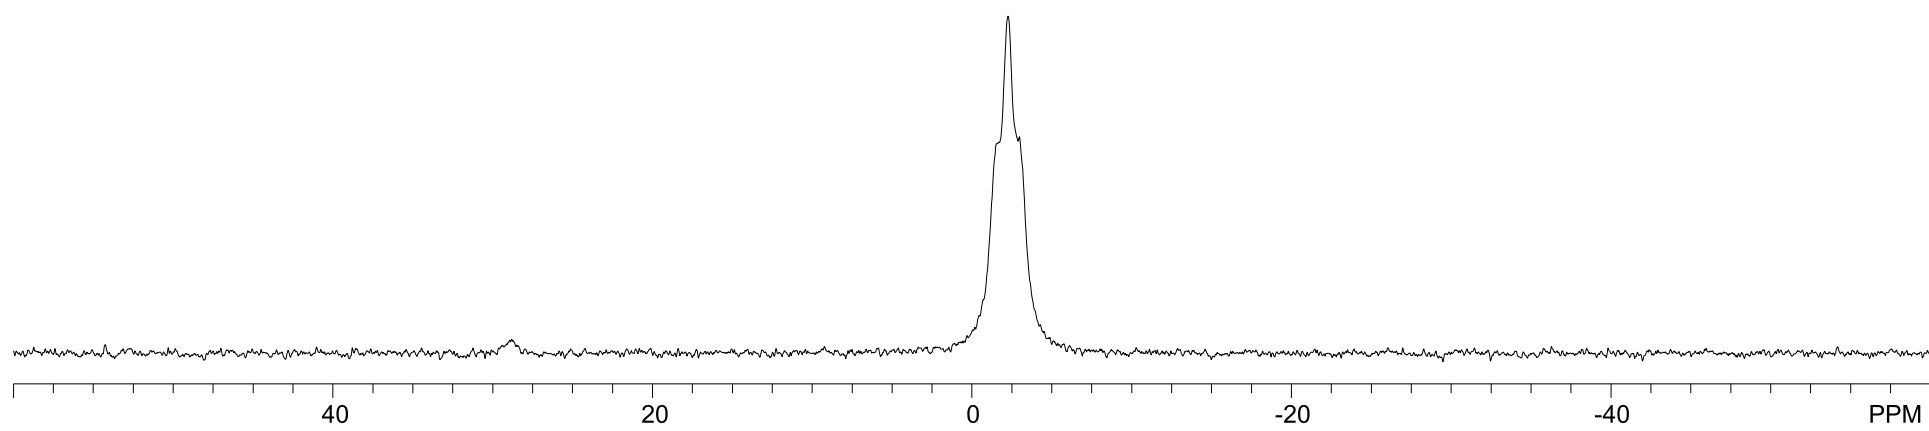

$^{11}\text{B}\{^1\text{H}\}$  NMR (128 MHz),  
 $\text{CDCl}_3$

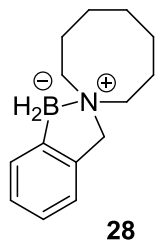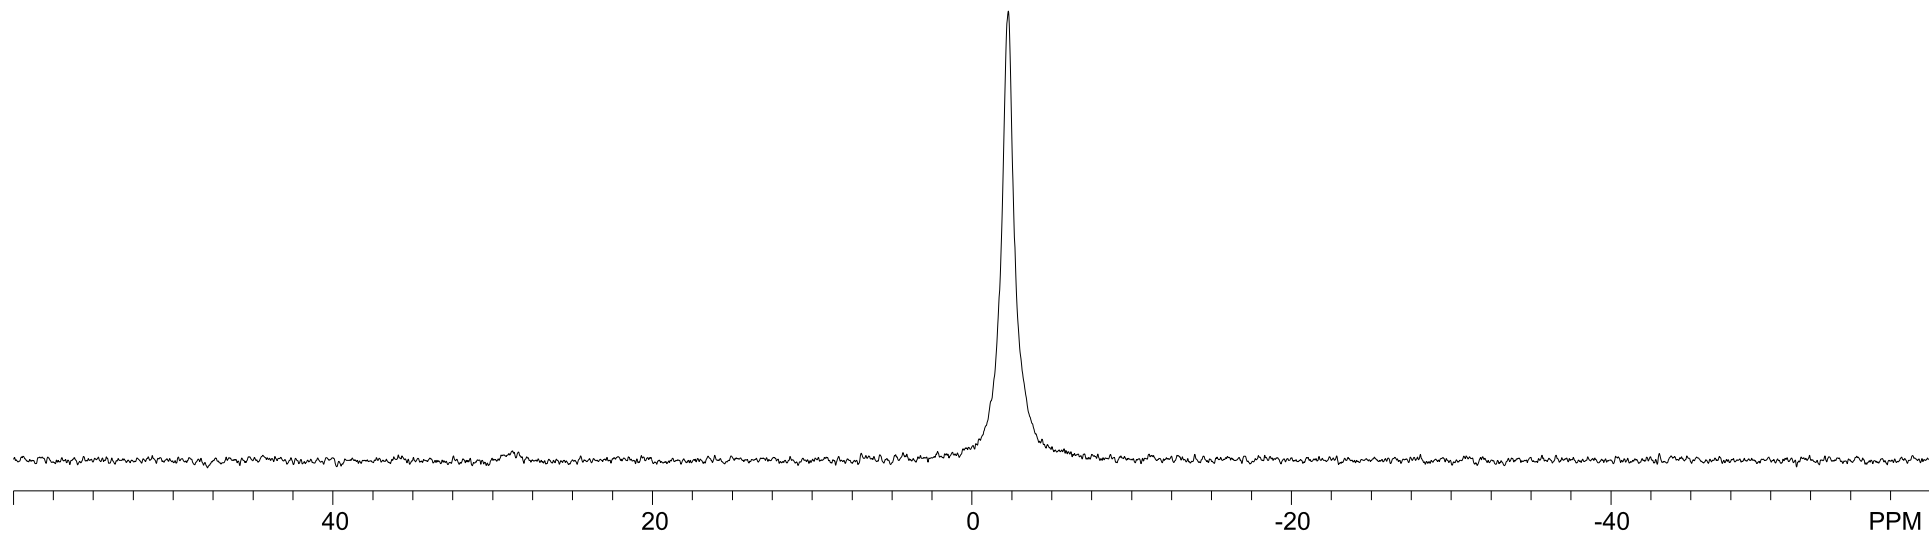

$^{13}\text{C}\{^1\text{H}\}$  NMR (126 MHz),  
 $\text{CDCl}_3$

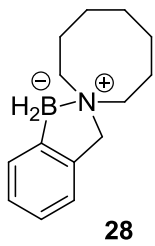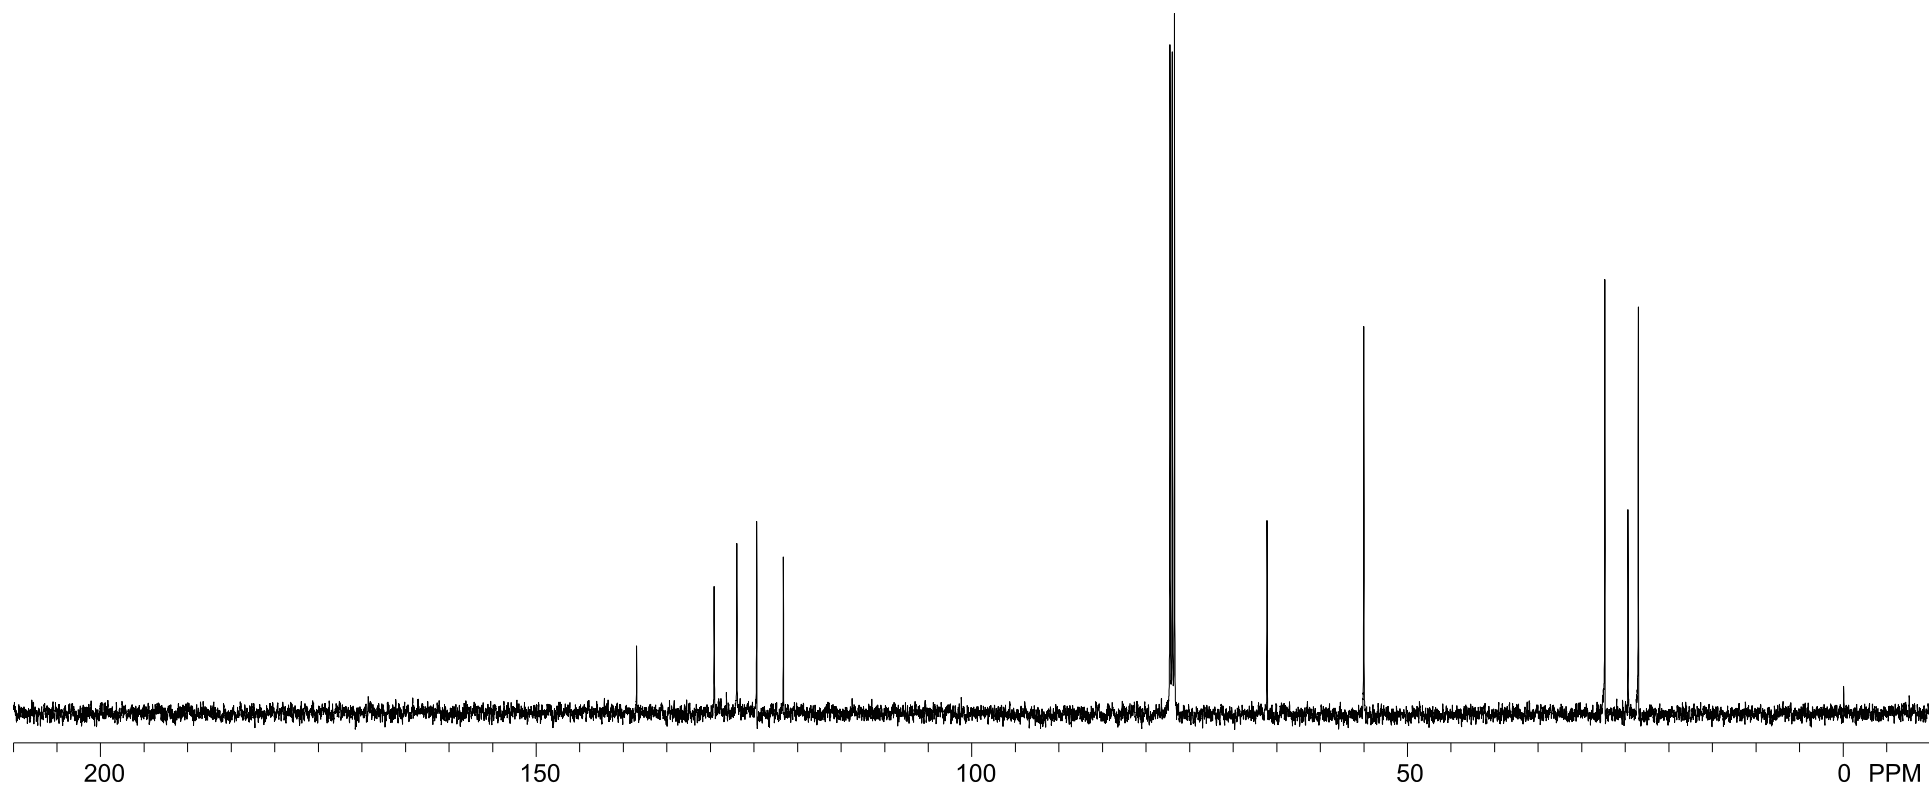



$^1\text{H}$  NMR (500 MHz),  
 $\text{CDCl}_3$

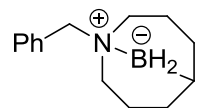

**29**

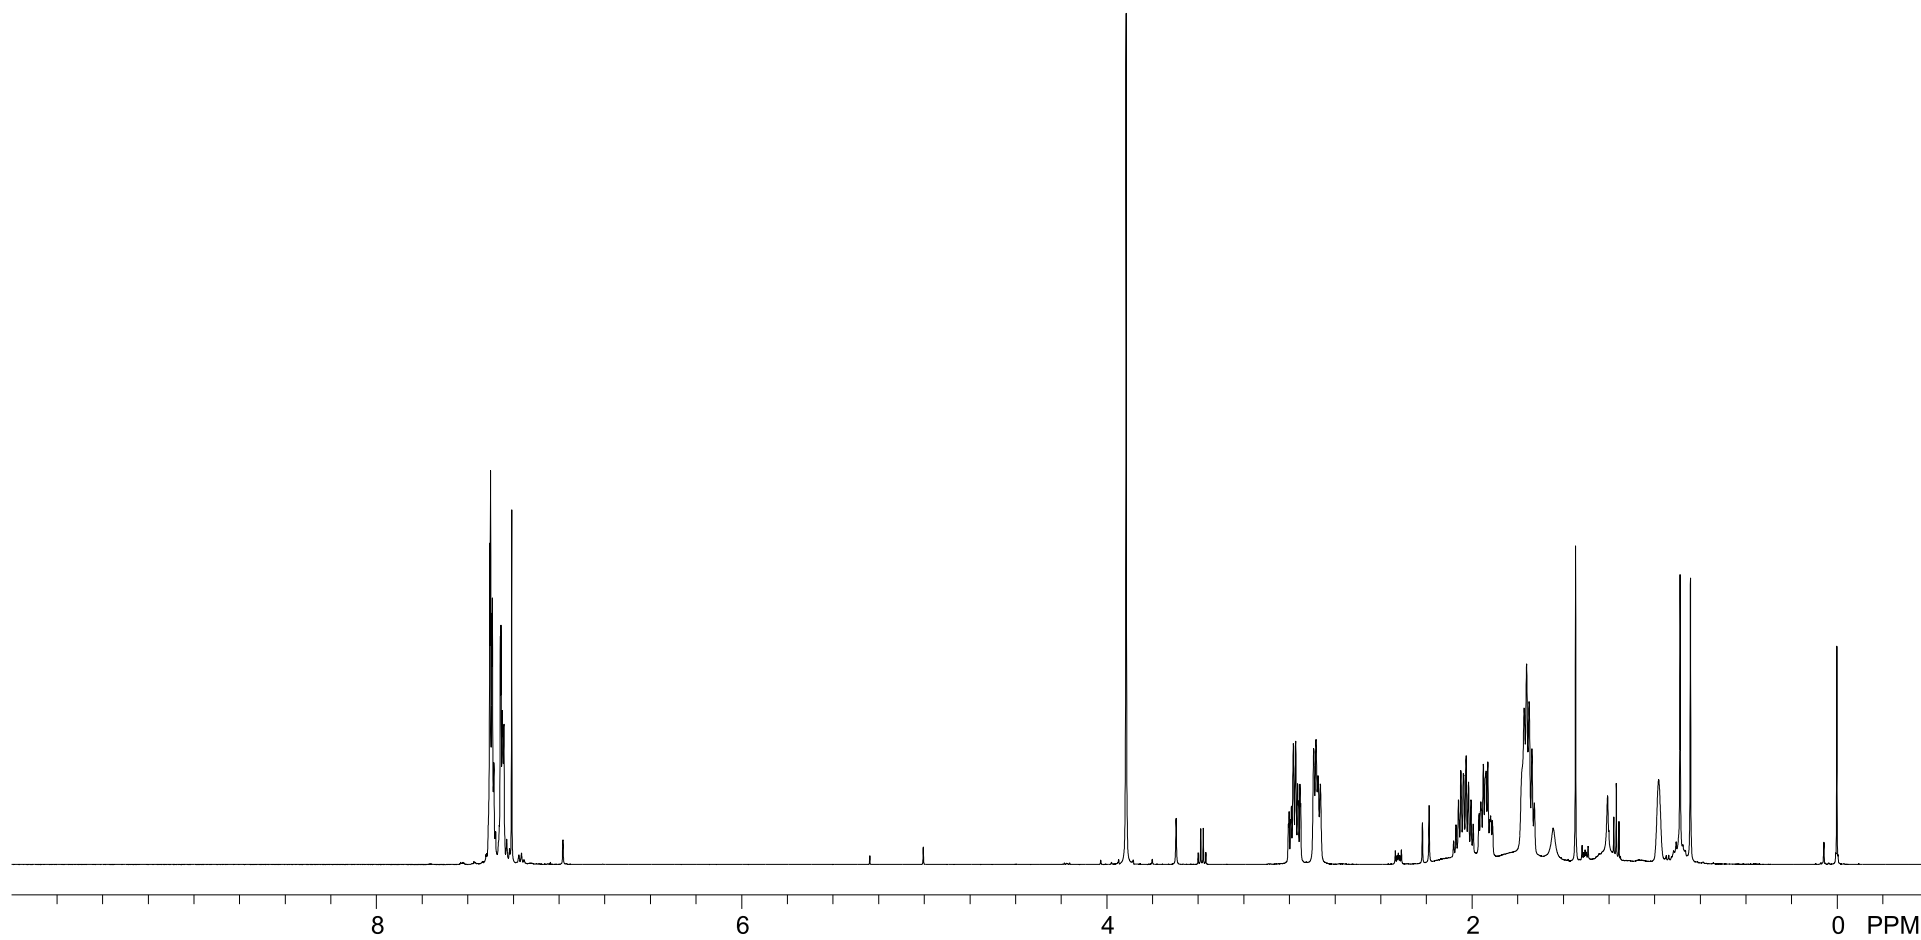

$^{11}\text{B}$  NMR (128 MHz),  
 $\text{CDCl}_3$



**29**

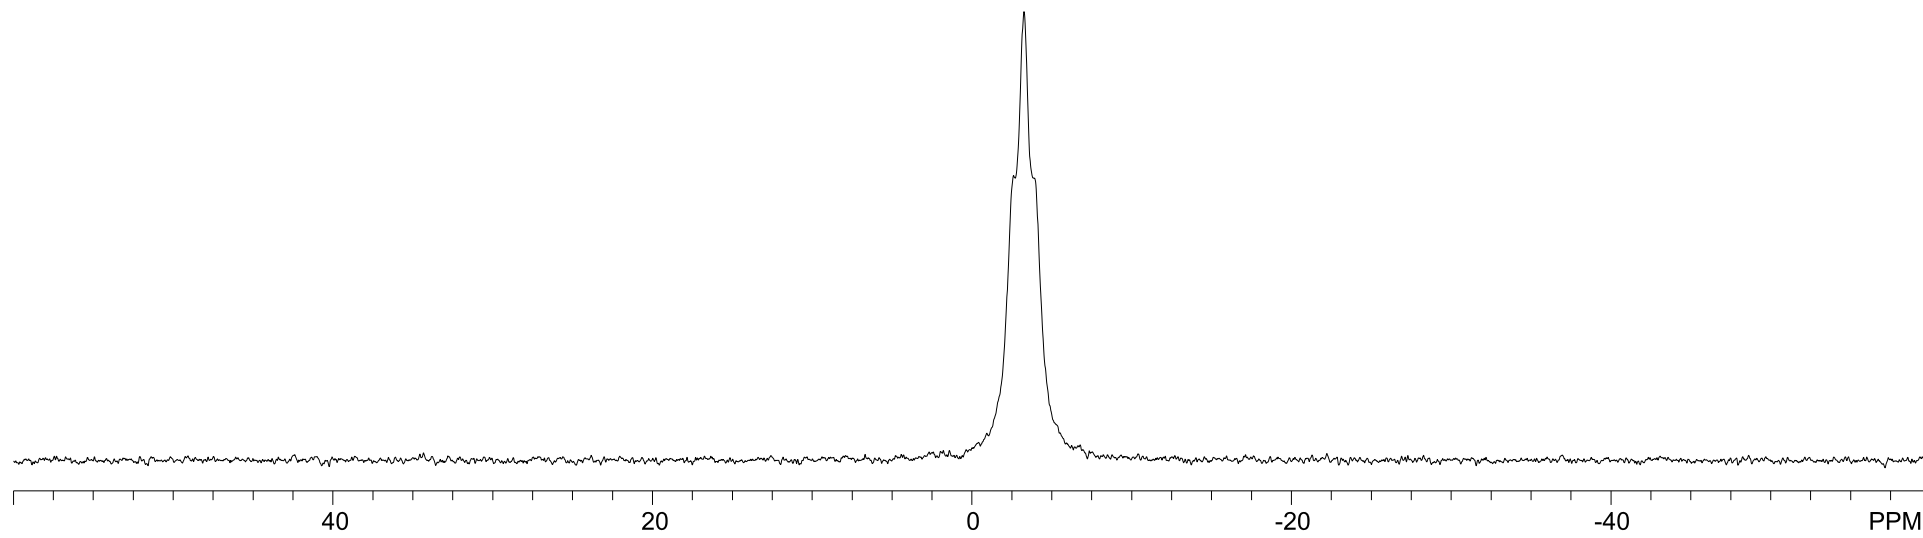

$^{11}\text{B}\{^1\text{H}\}$  NMR (128 MHz),  
 $\text{CDCl}_3$

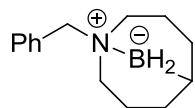

**29**

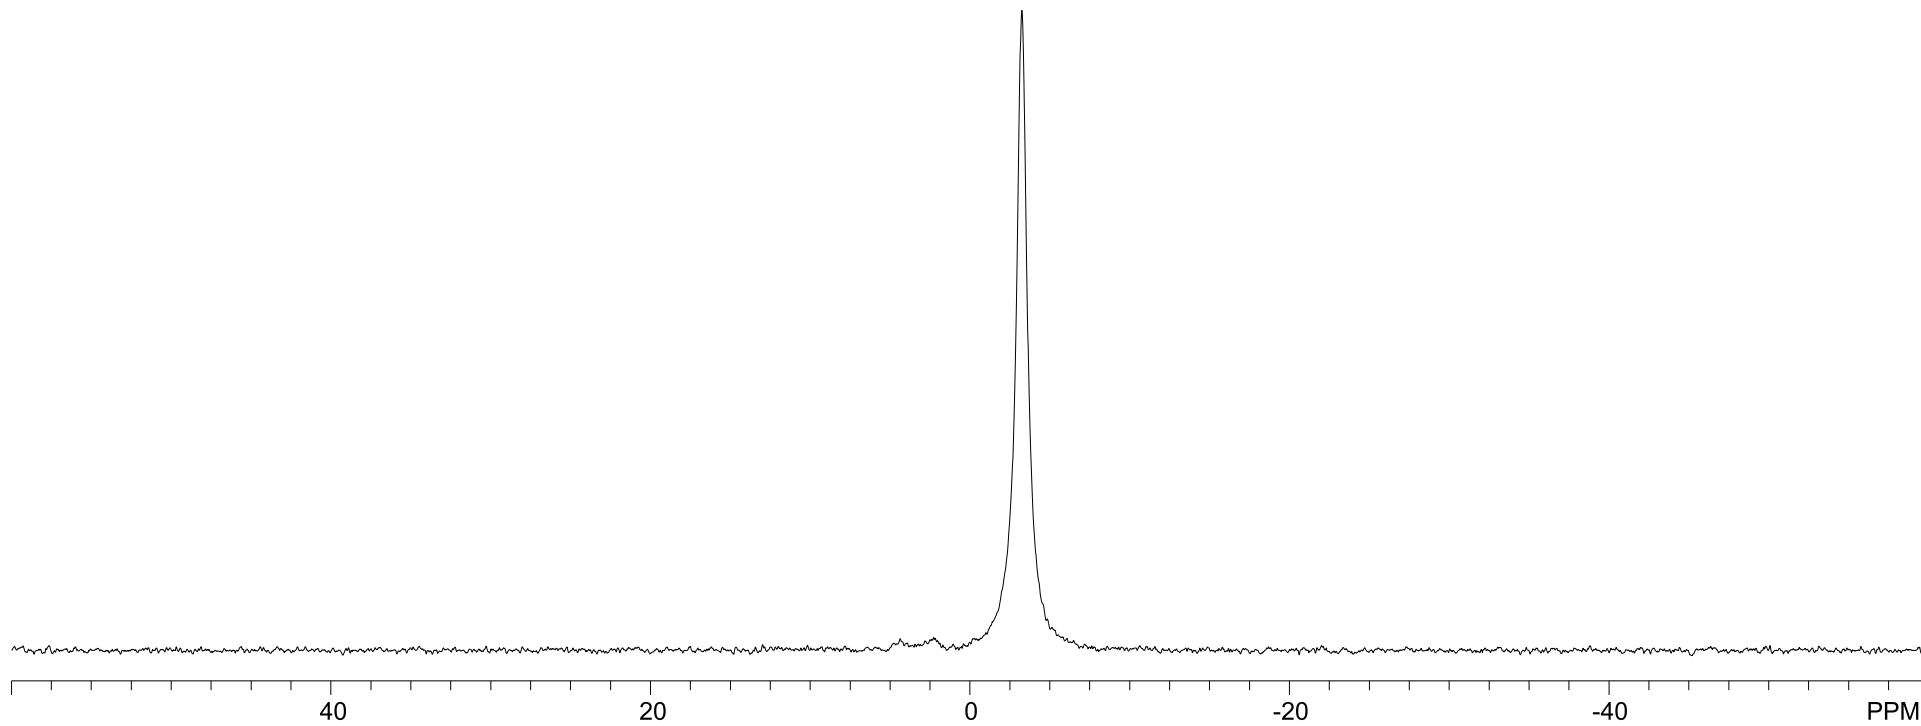

$^{13}\text{C}\{^1\text{H}\}$  NMR (126 MHz),  
 $\text{CDCl}_3$



**29**

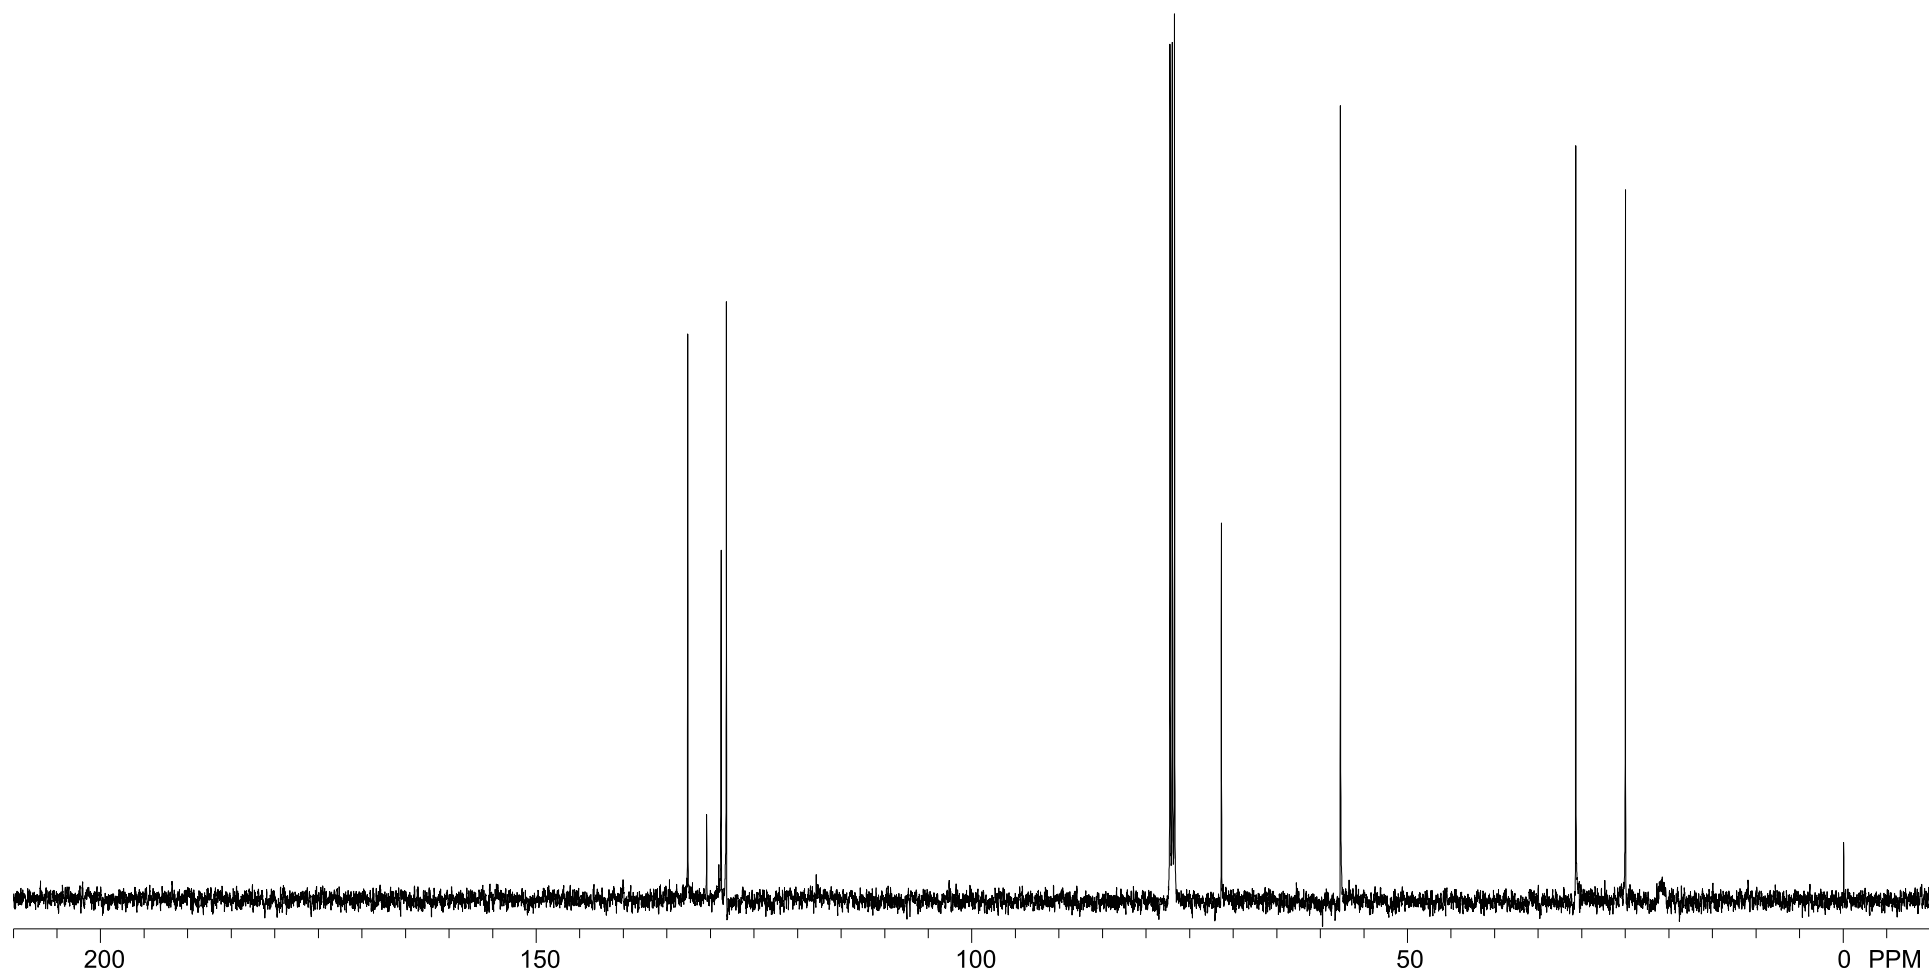

$^1\text{H NMR}$  (500 MHz),  
 $\text{CDCl}_3$

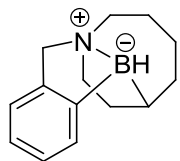

30

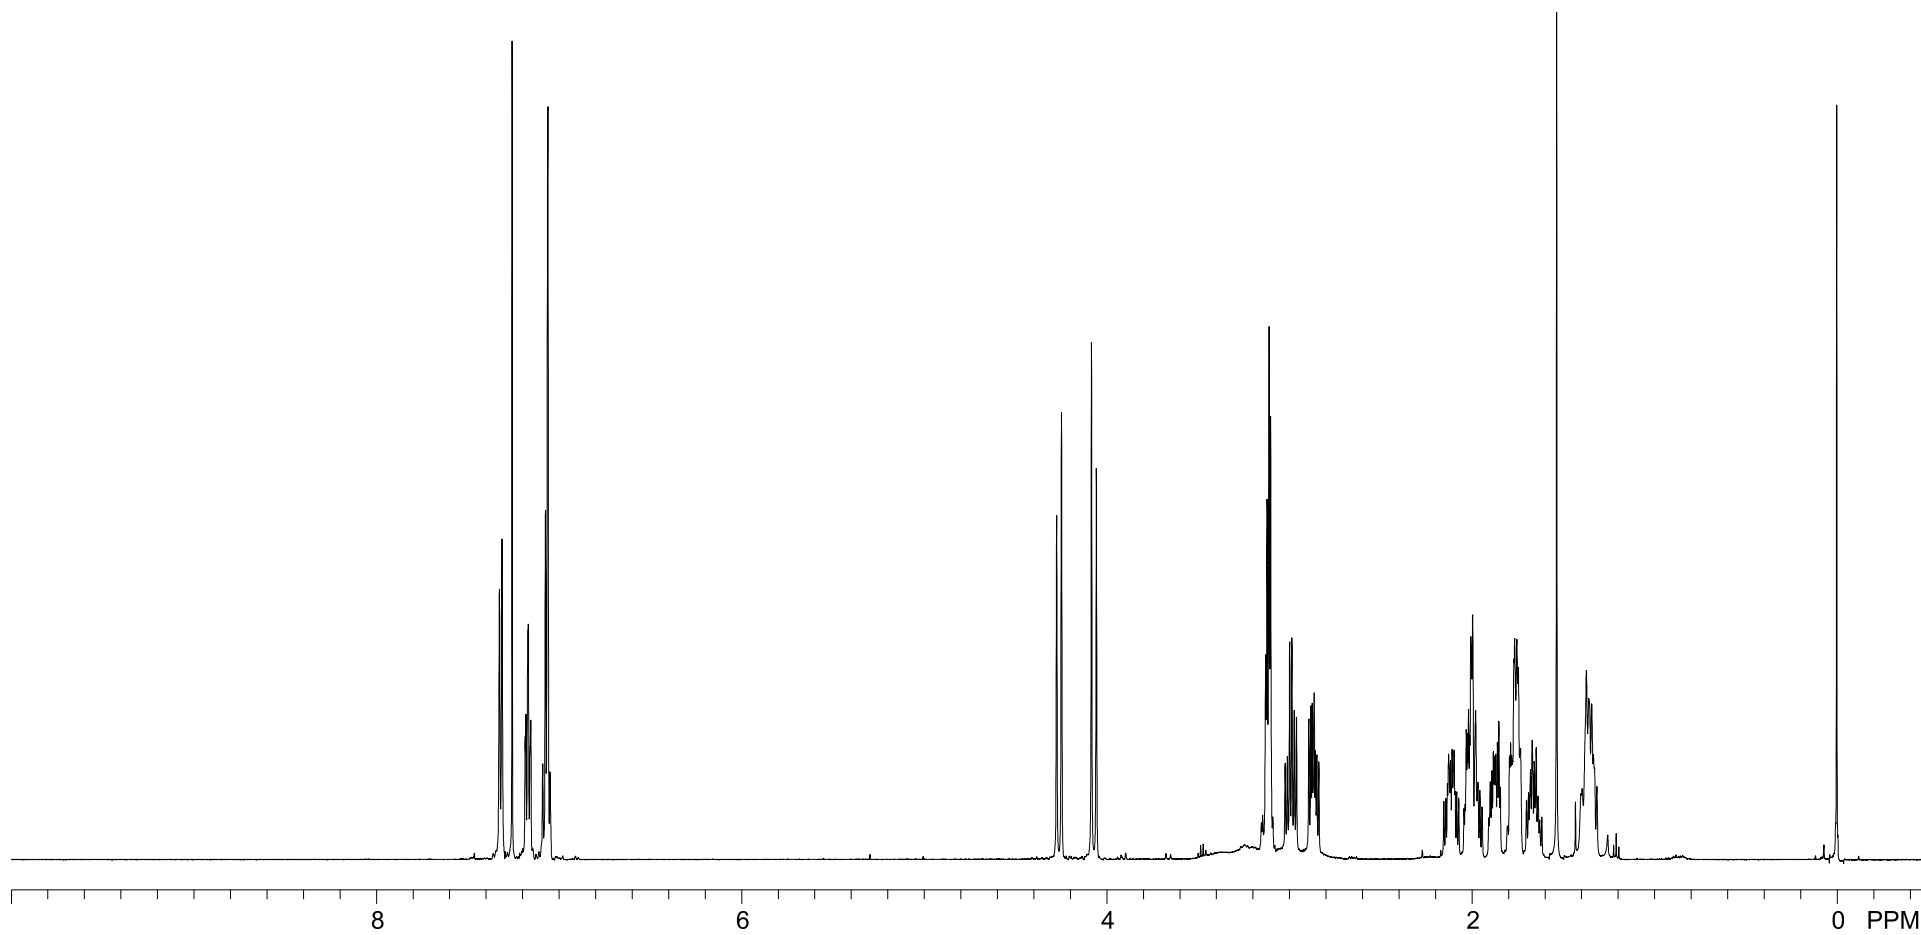

$^{11}\text{B}$  NMR (128 MHz),  
 $\text{CDCl}_3$

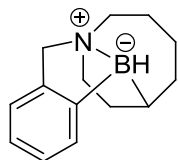

**30**

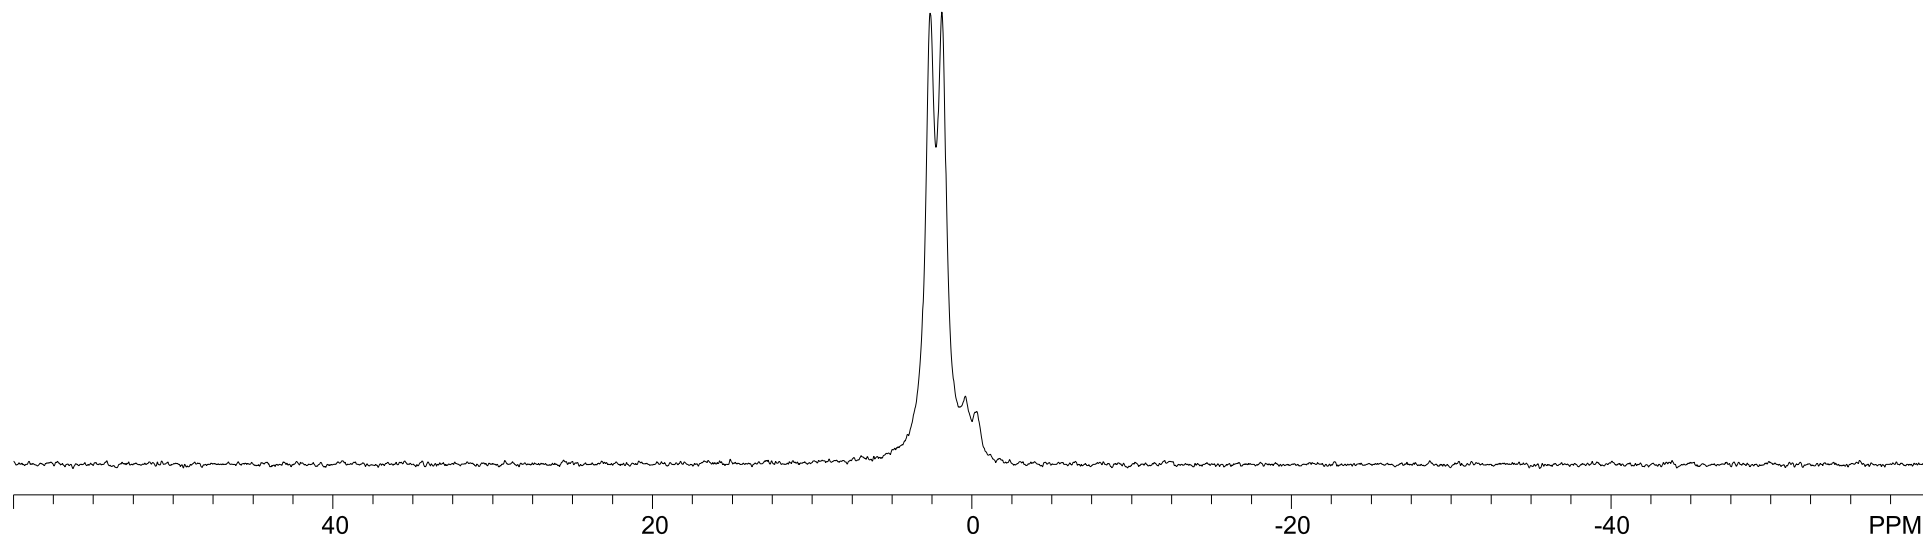

$^{11}\text{B}\{^1\text{H}\}$  NMR (128 MHz),  
 $\text{CDCl}_3$



**30**

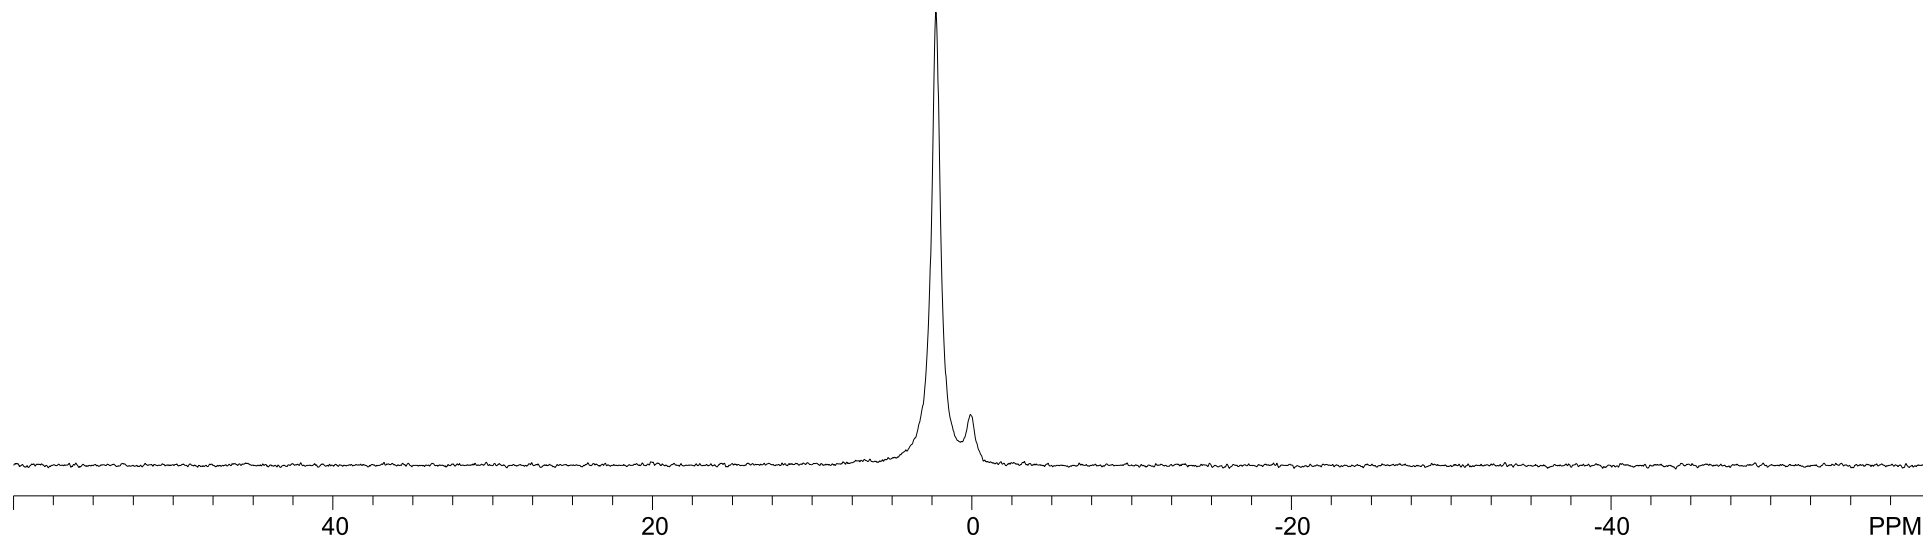

$^{13}\text{C}\{^1\text{H}\}$  NMR (126 MHz),  
 $\text{CDCl}_3$



**30**

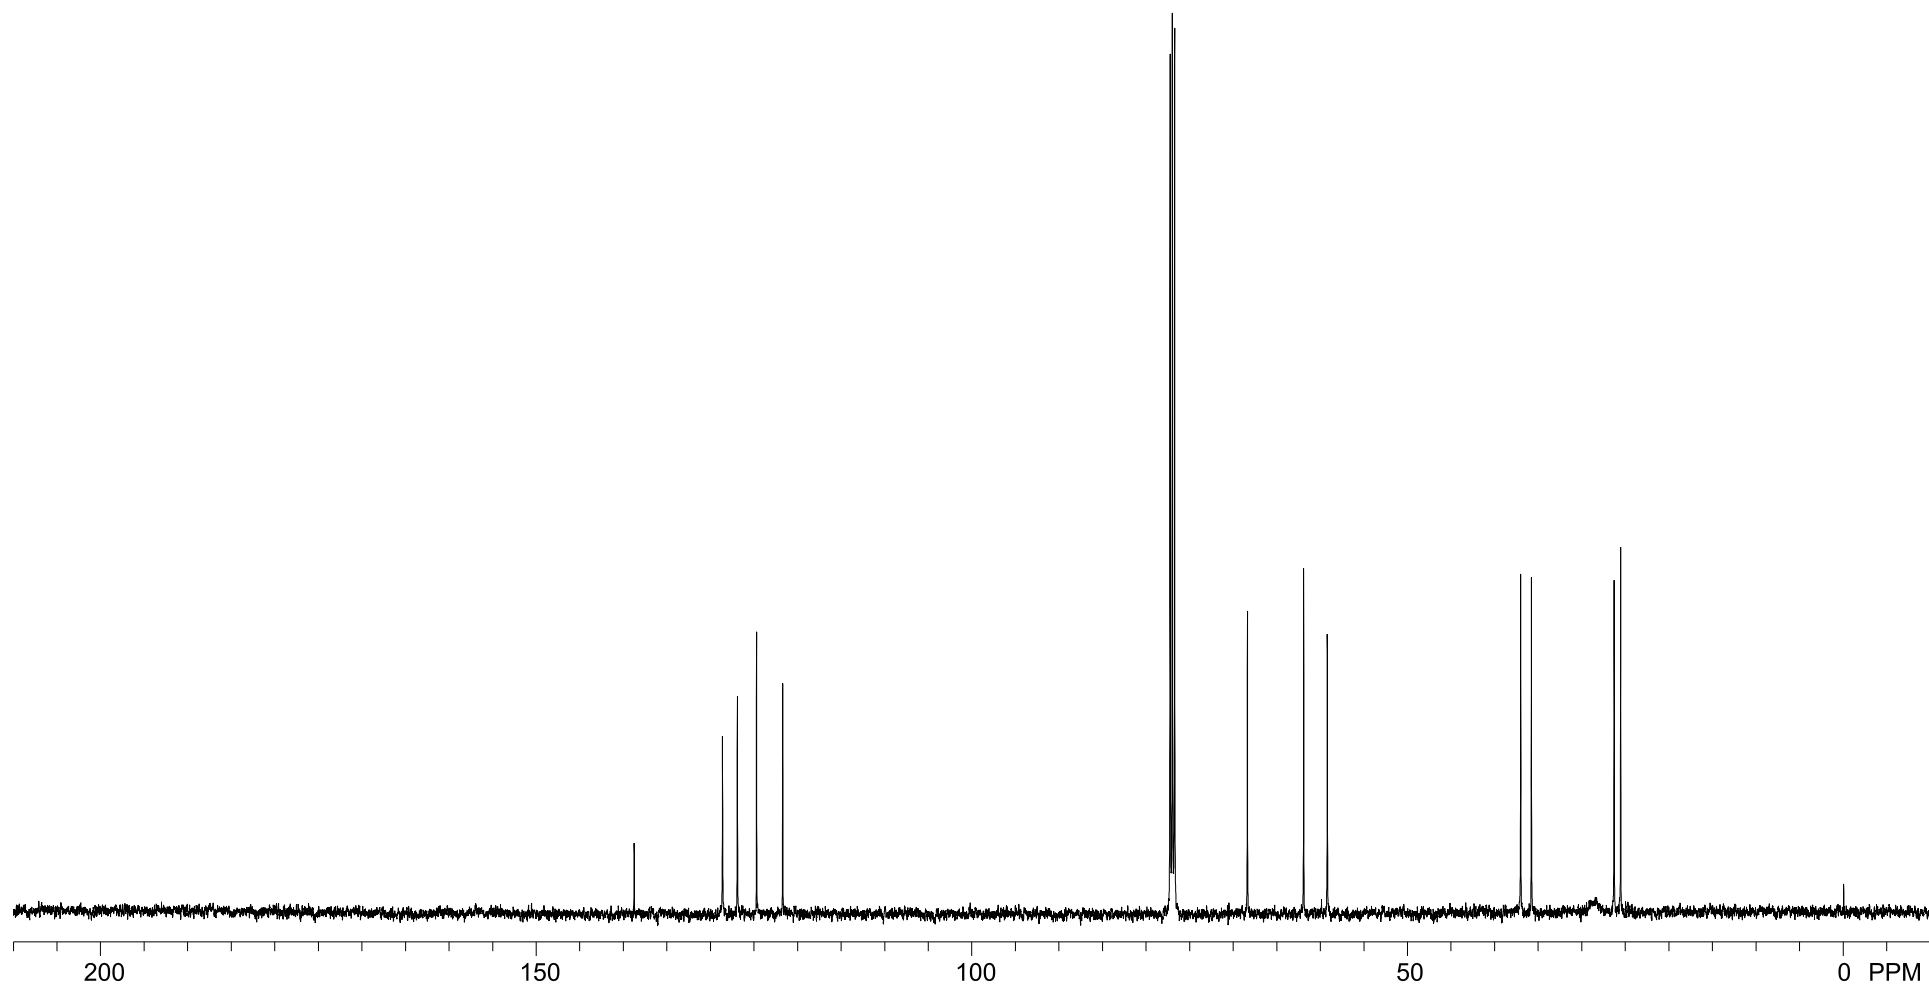



$^1\text{H}$  NMR (500 MHz),  
 $\text{CDCl}_3$

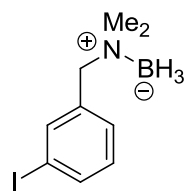

44

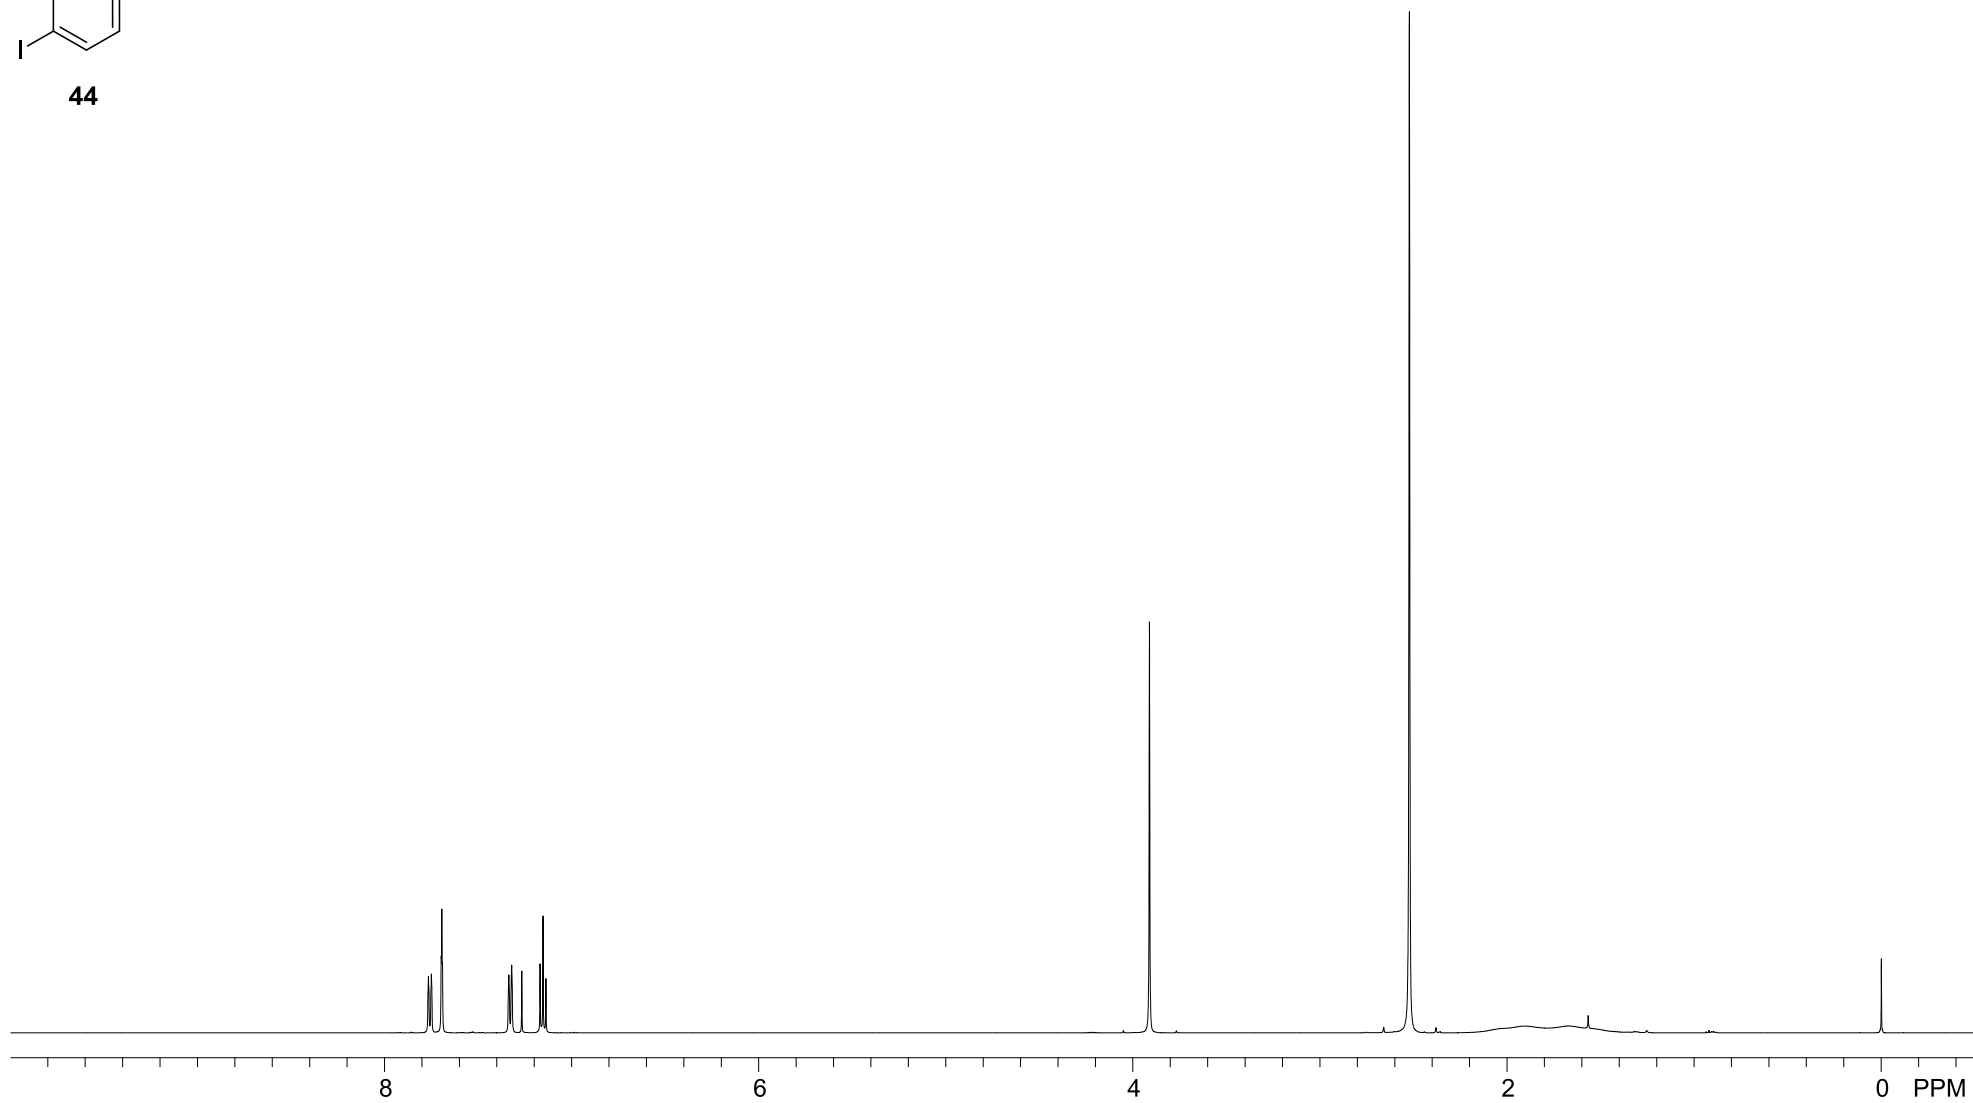

$^{11}\text{B}$  NMR (128 MHz),  
 $\text{CDCl}_3$

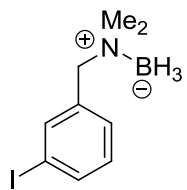

**44**

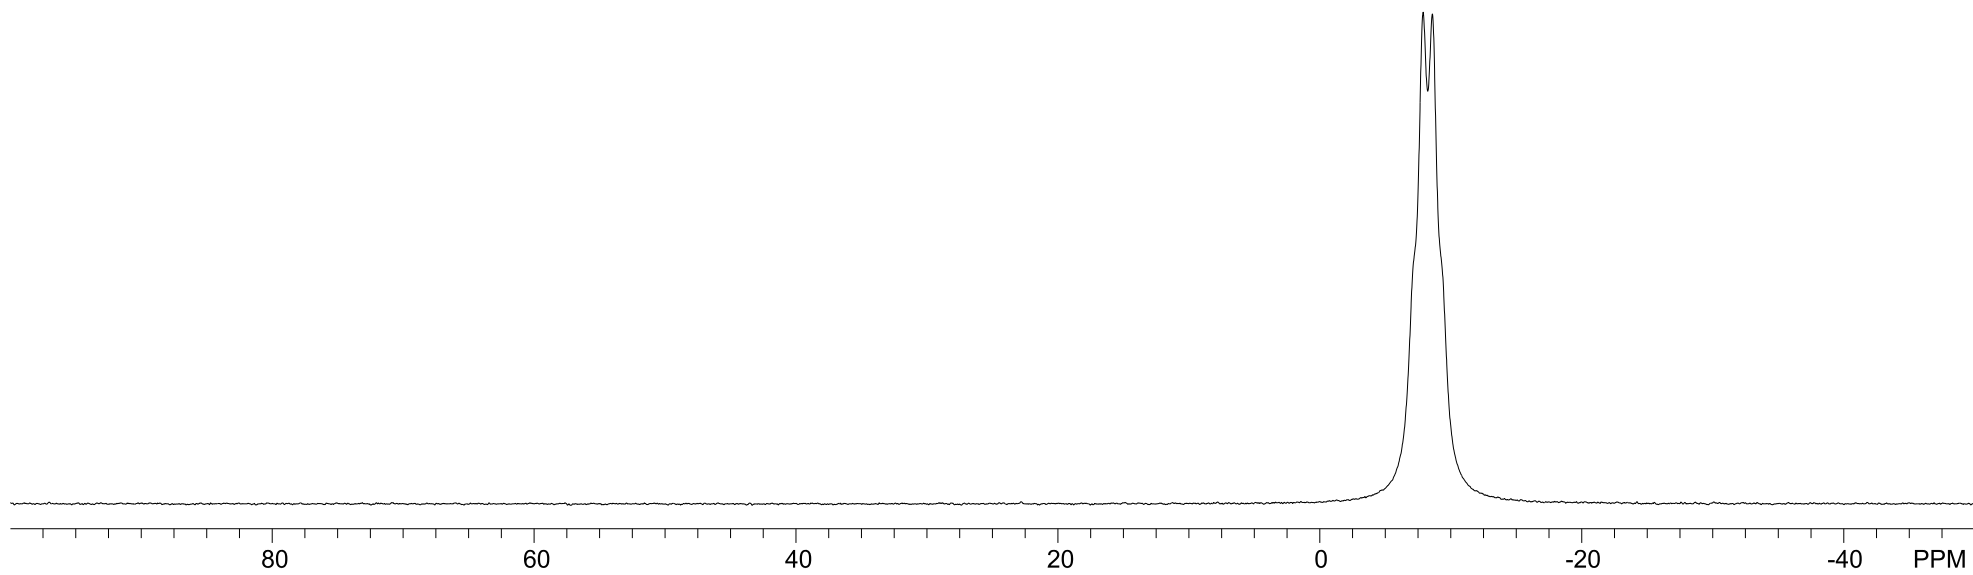

$^{11}\text{B}\{^1\text{H}\}$  NMR (128 MHz),  
 $\text{CDCl}_3$



**44**

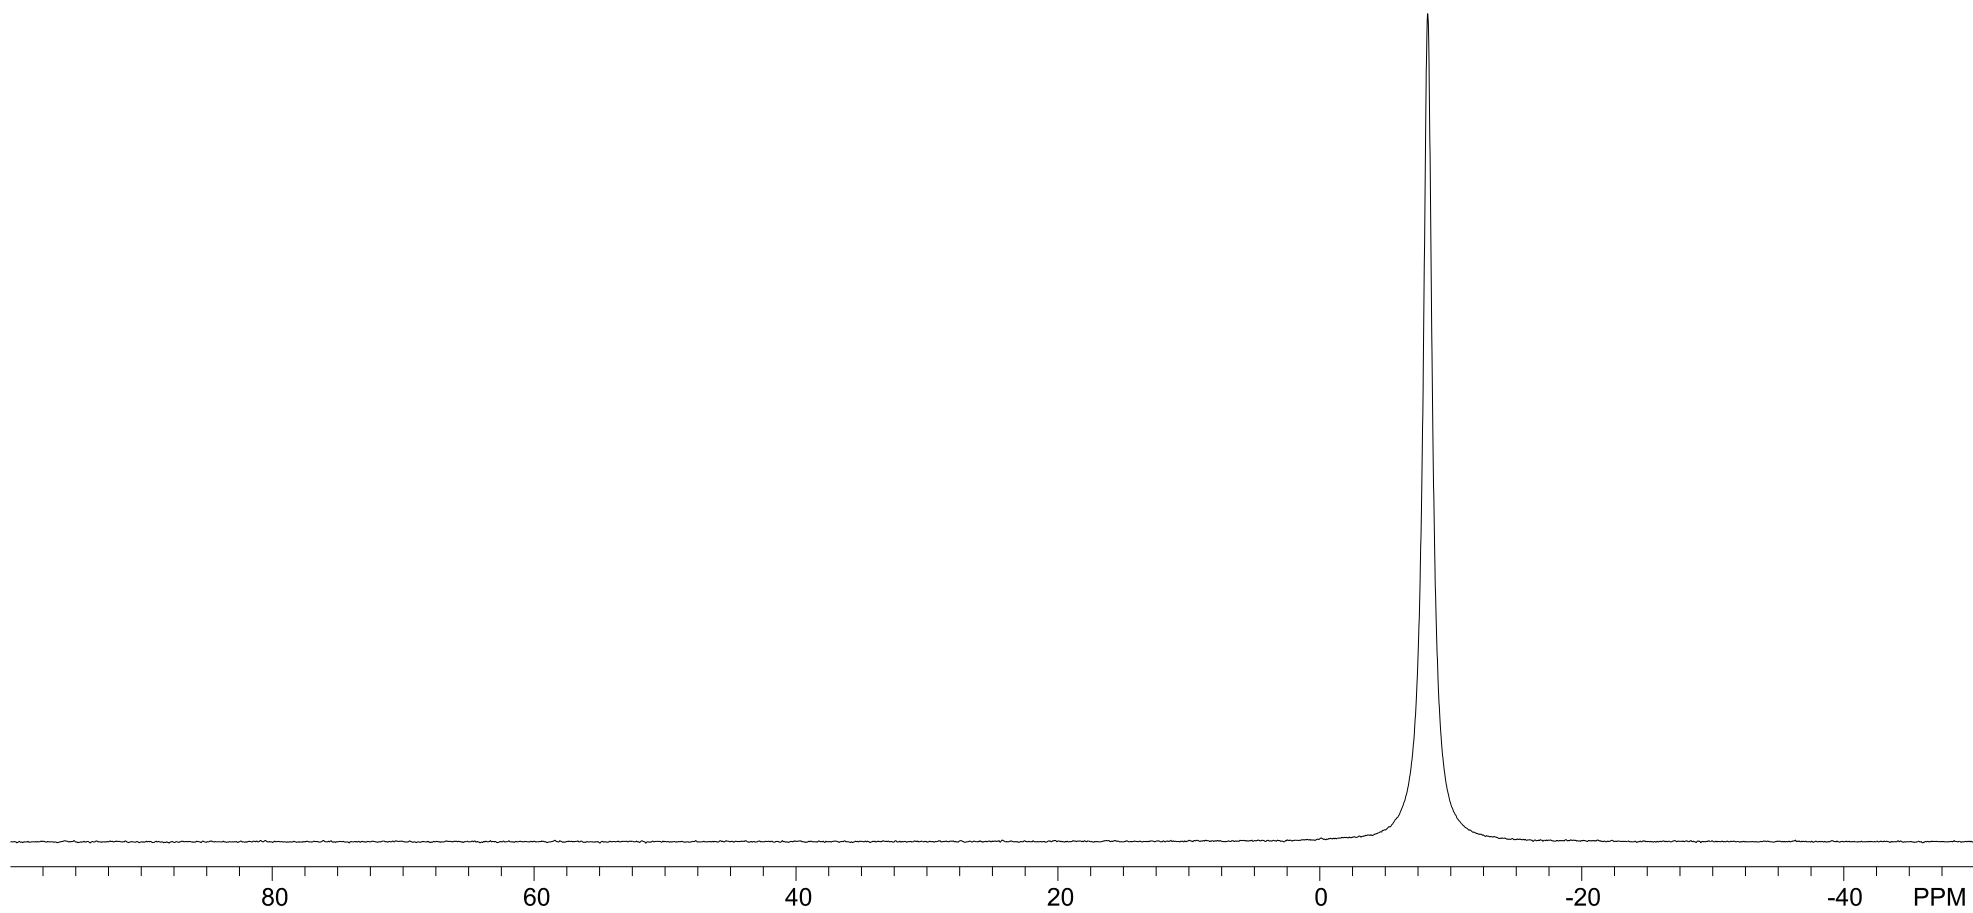

S83

$^{13}\text{C}\{^1\text{H}\}$  NMR (101 MHz),  
 $\text{CDCl}_3$



44

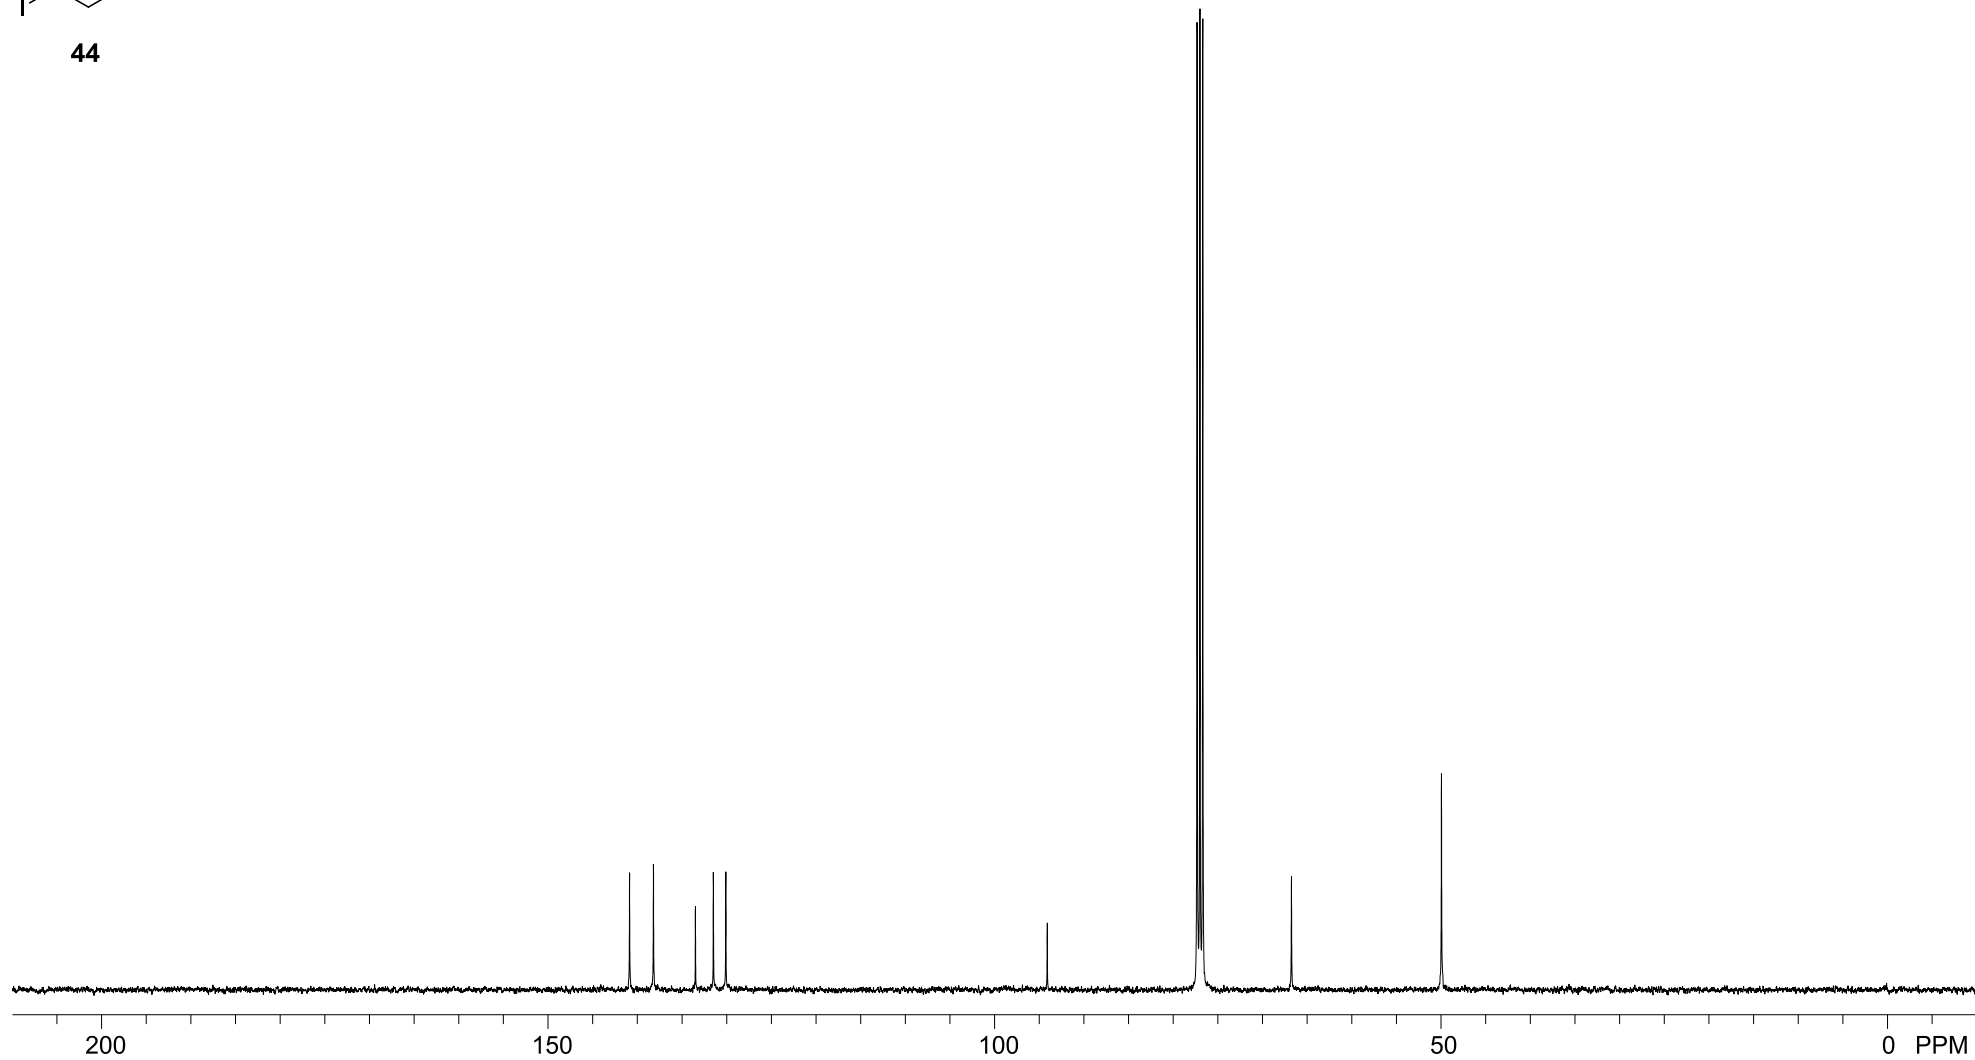

$^1\text{H}$  NMR (500 MHz),  
 $\text{CDCl}_3$

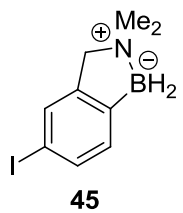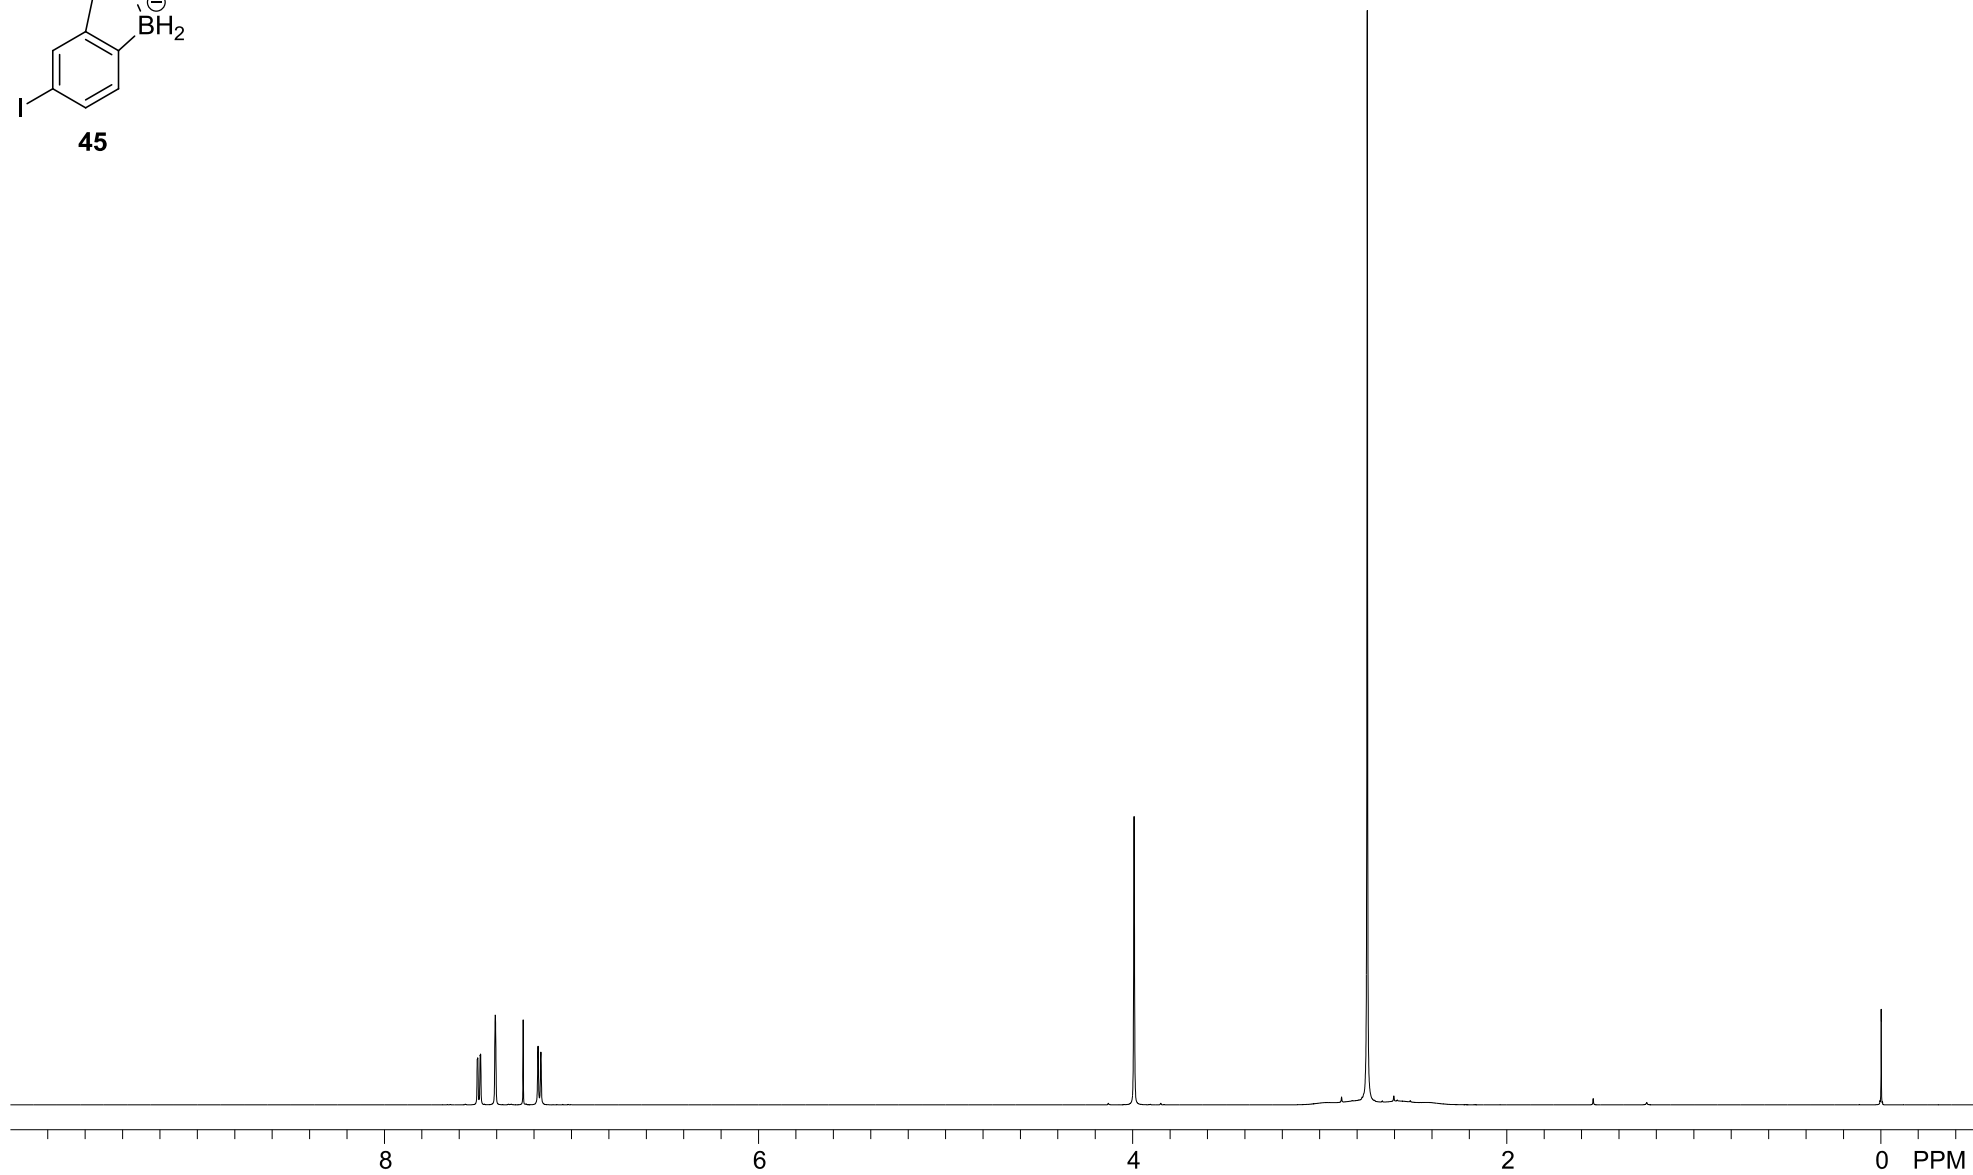

$^{11}\text{B}$  NMR (128 MHz),  
 $\text{CDCl}_3$

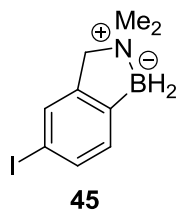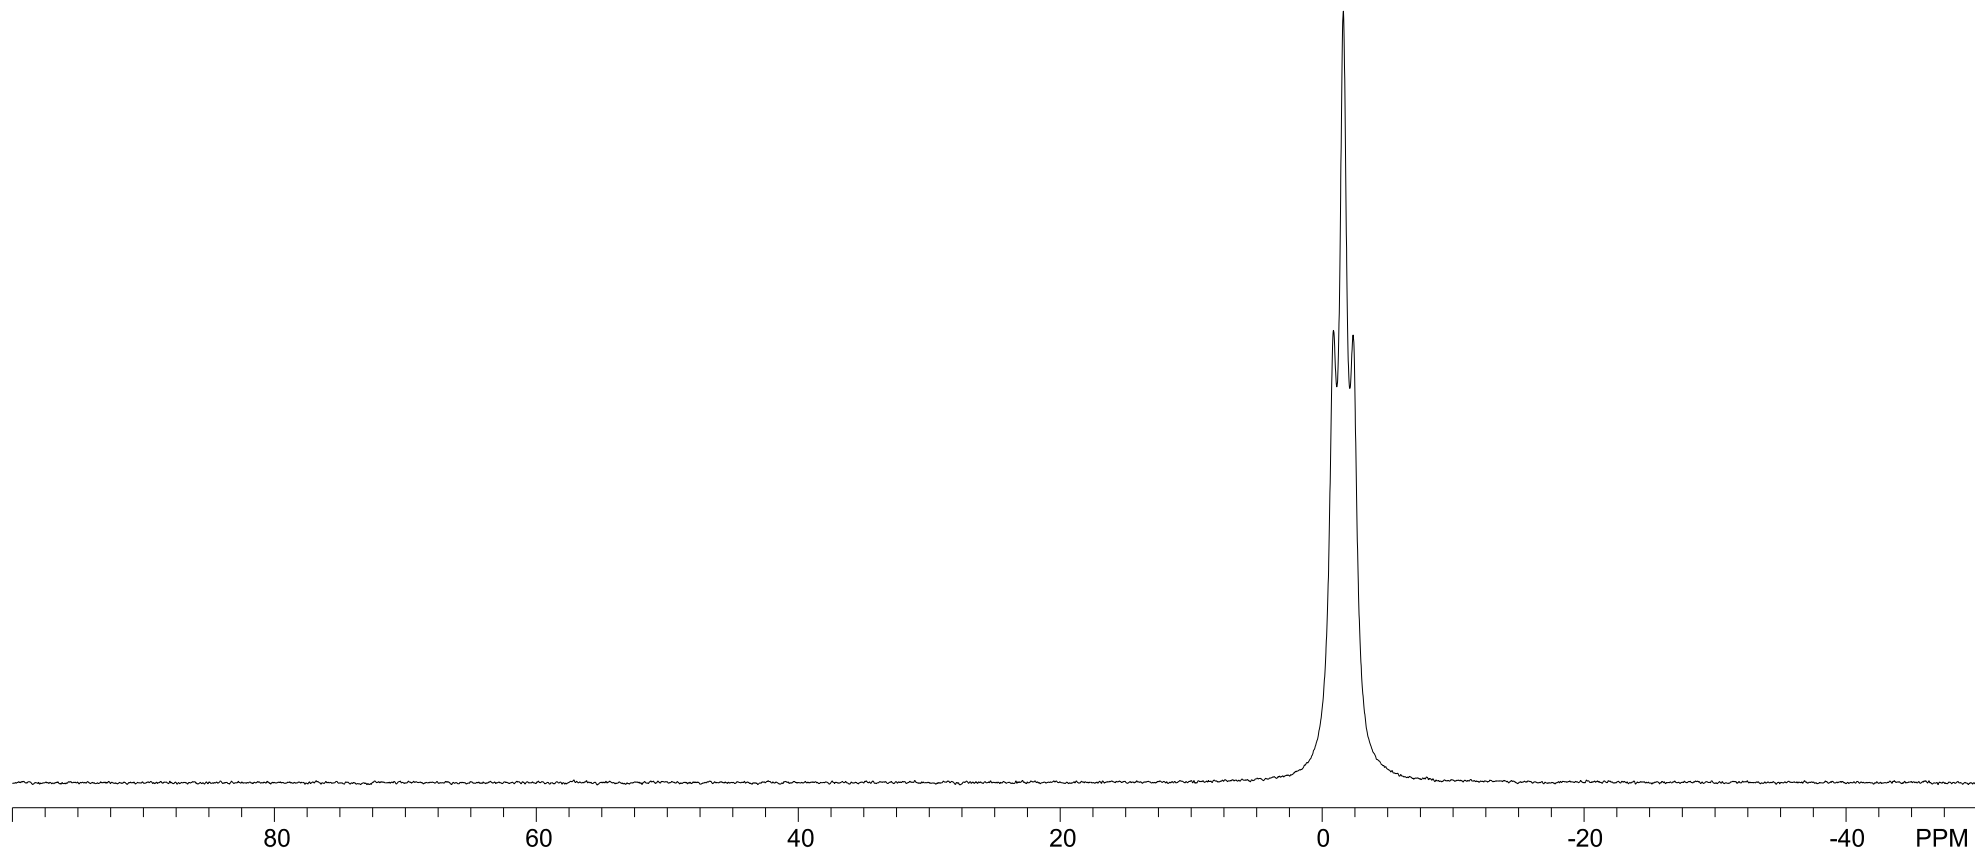

$^{11}\text{B}\{^1\text{H}\}$  NMR (128 MHz),  
 $\text{CDCl}_3$

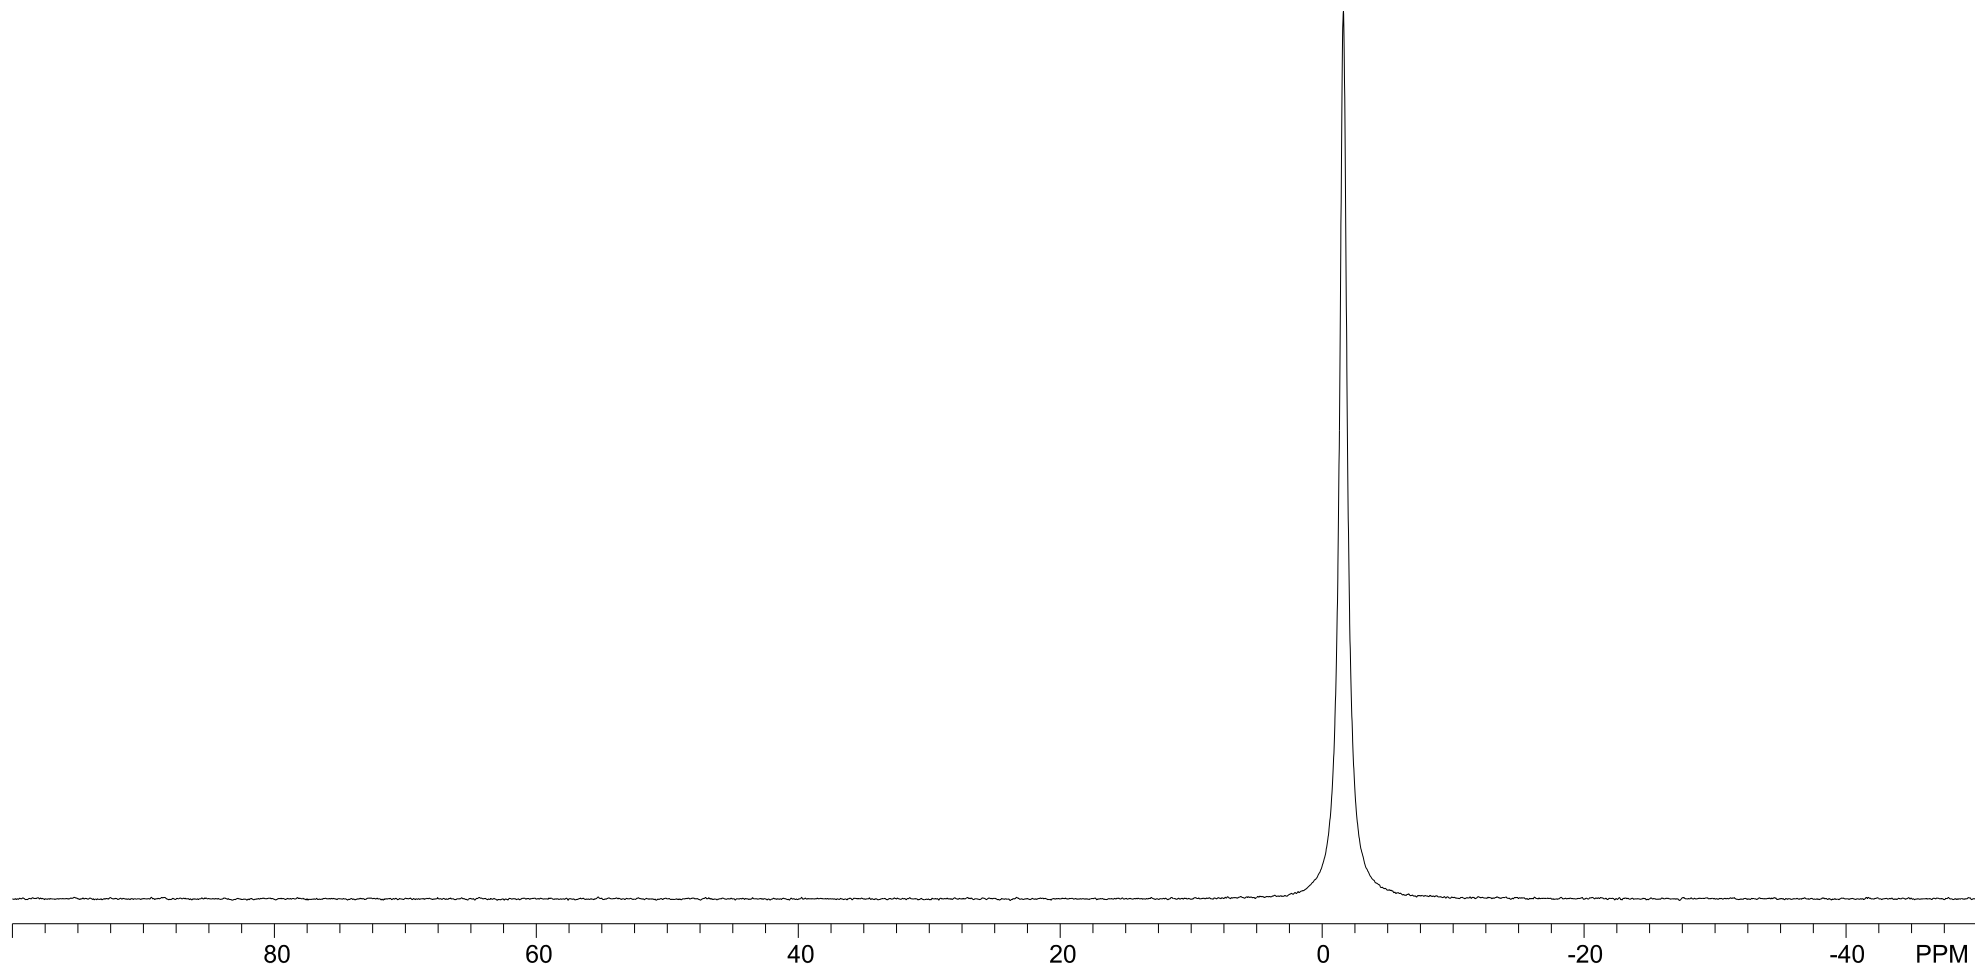

$^{13}\text{C}\{^1\text{H}\}$  NMR (101 MHz),  
 $\text{CDCl}_3$

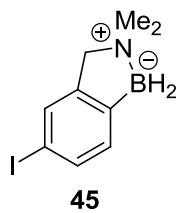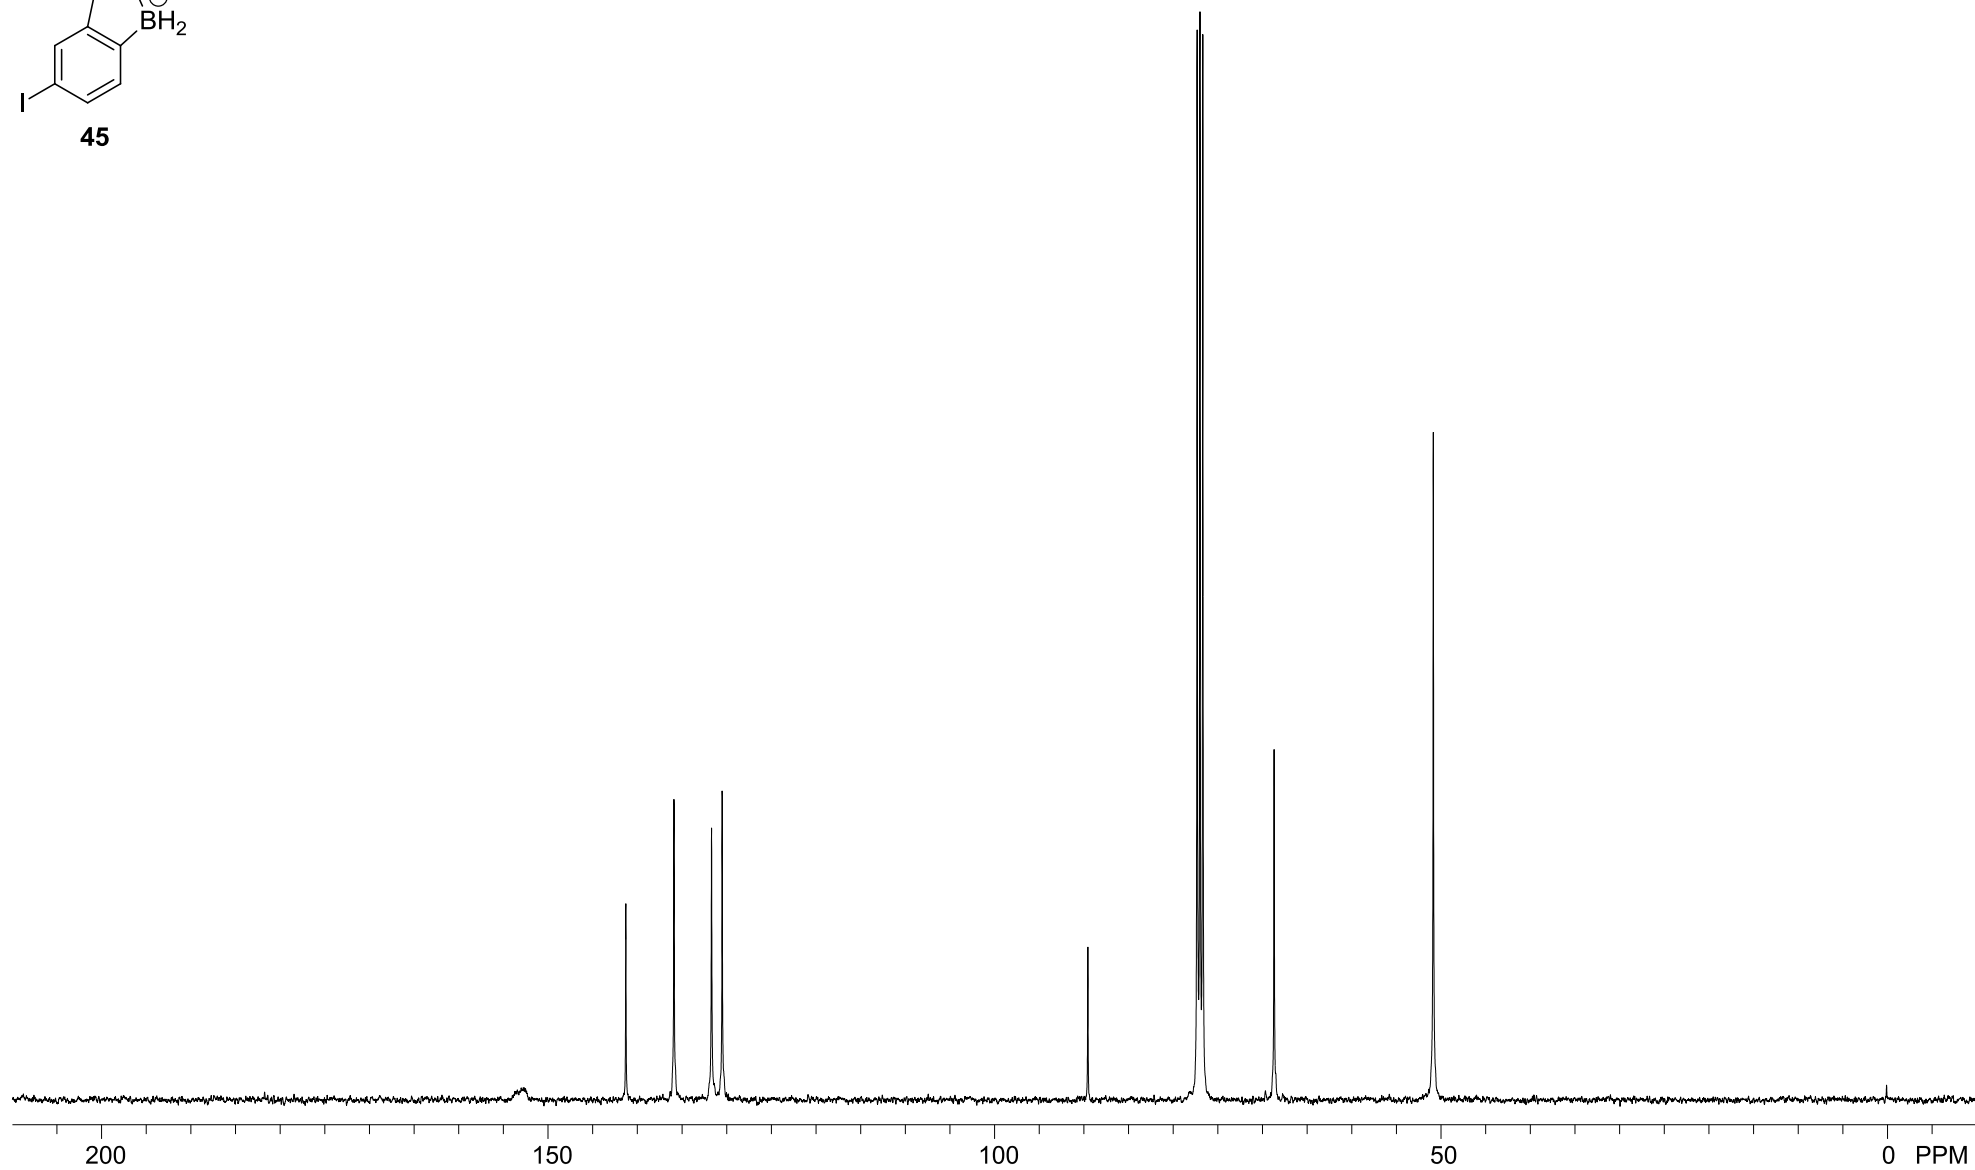



$^1\text{H}$  NMR (500 MHz),  
 $\text{CDCl}_3$

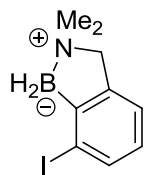

46

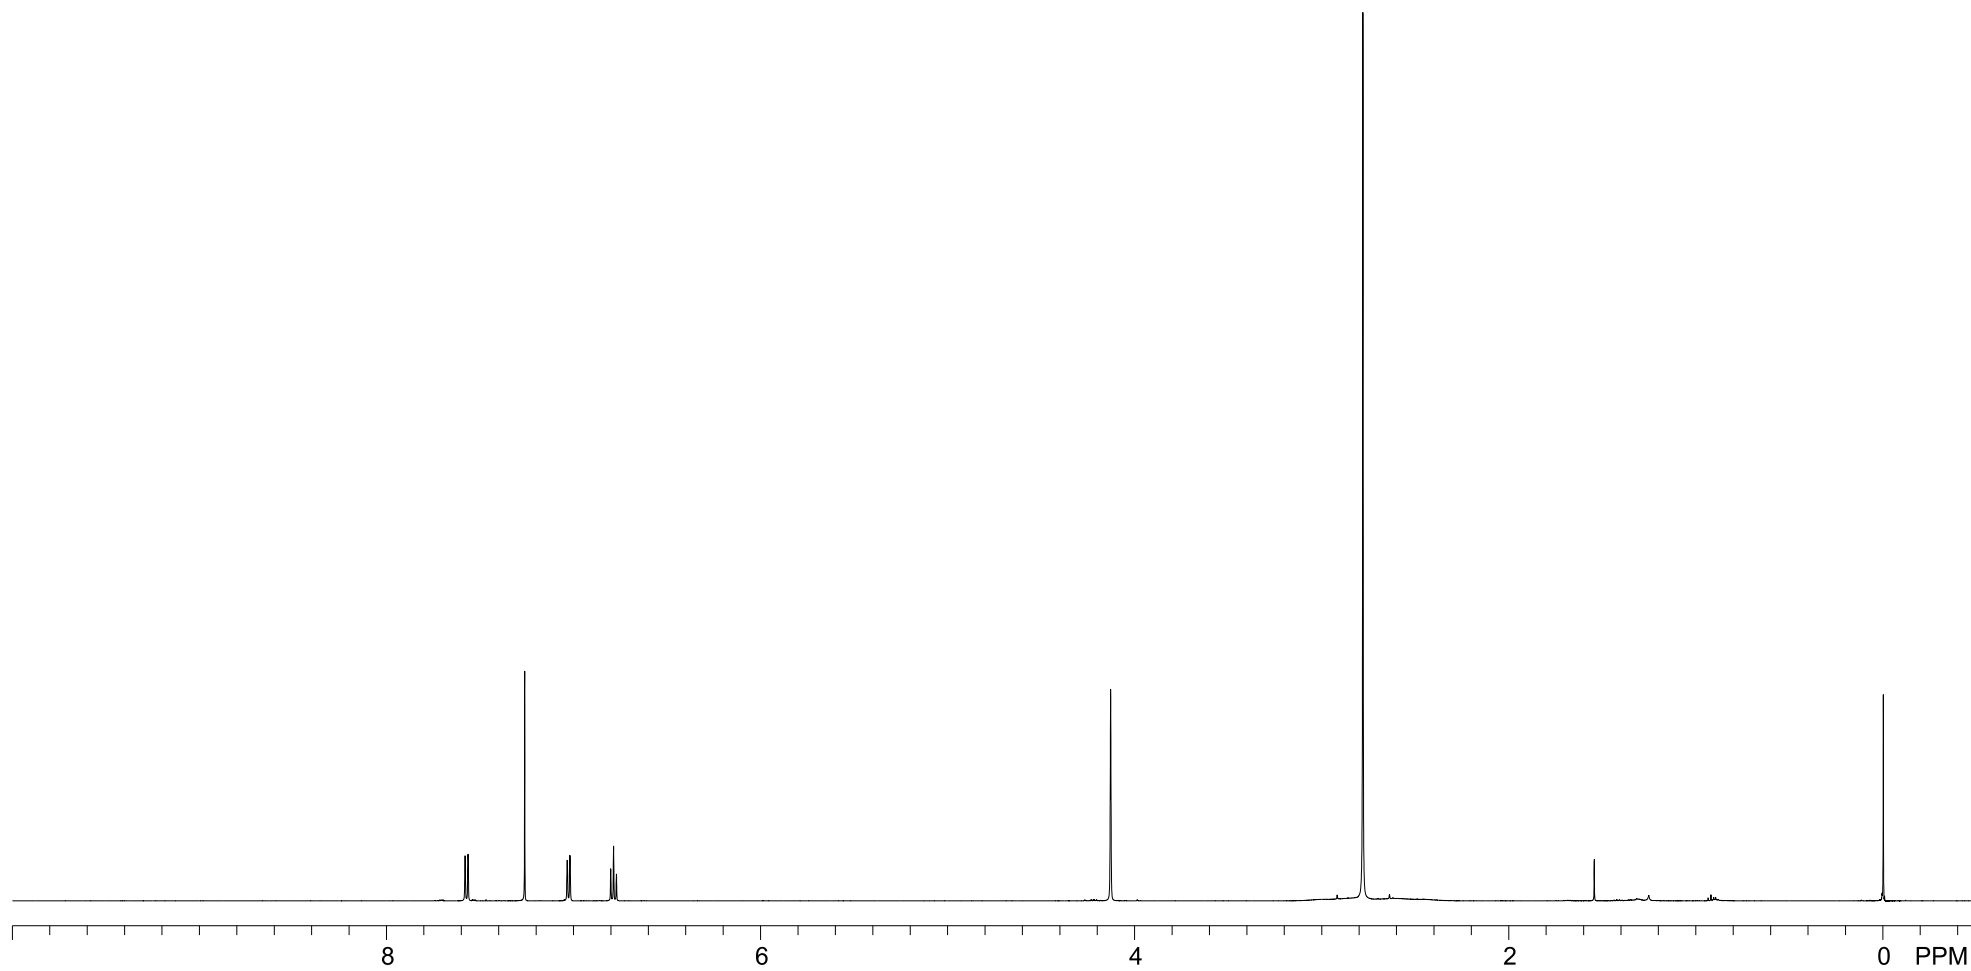

$^{11}\text{B}$  NMR (128 MHz),  
 $\text{CDCl}_3$

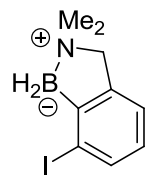

**46**

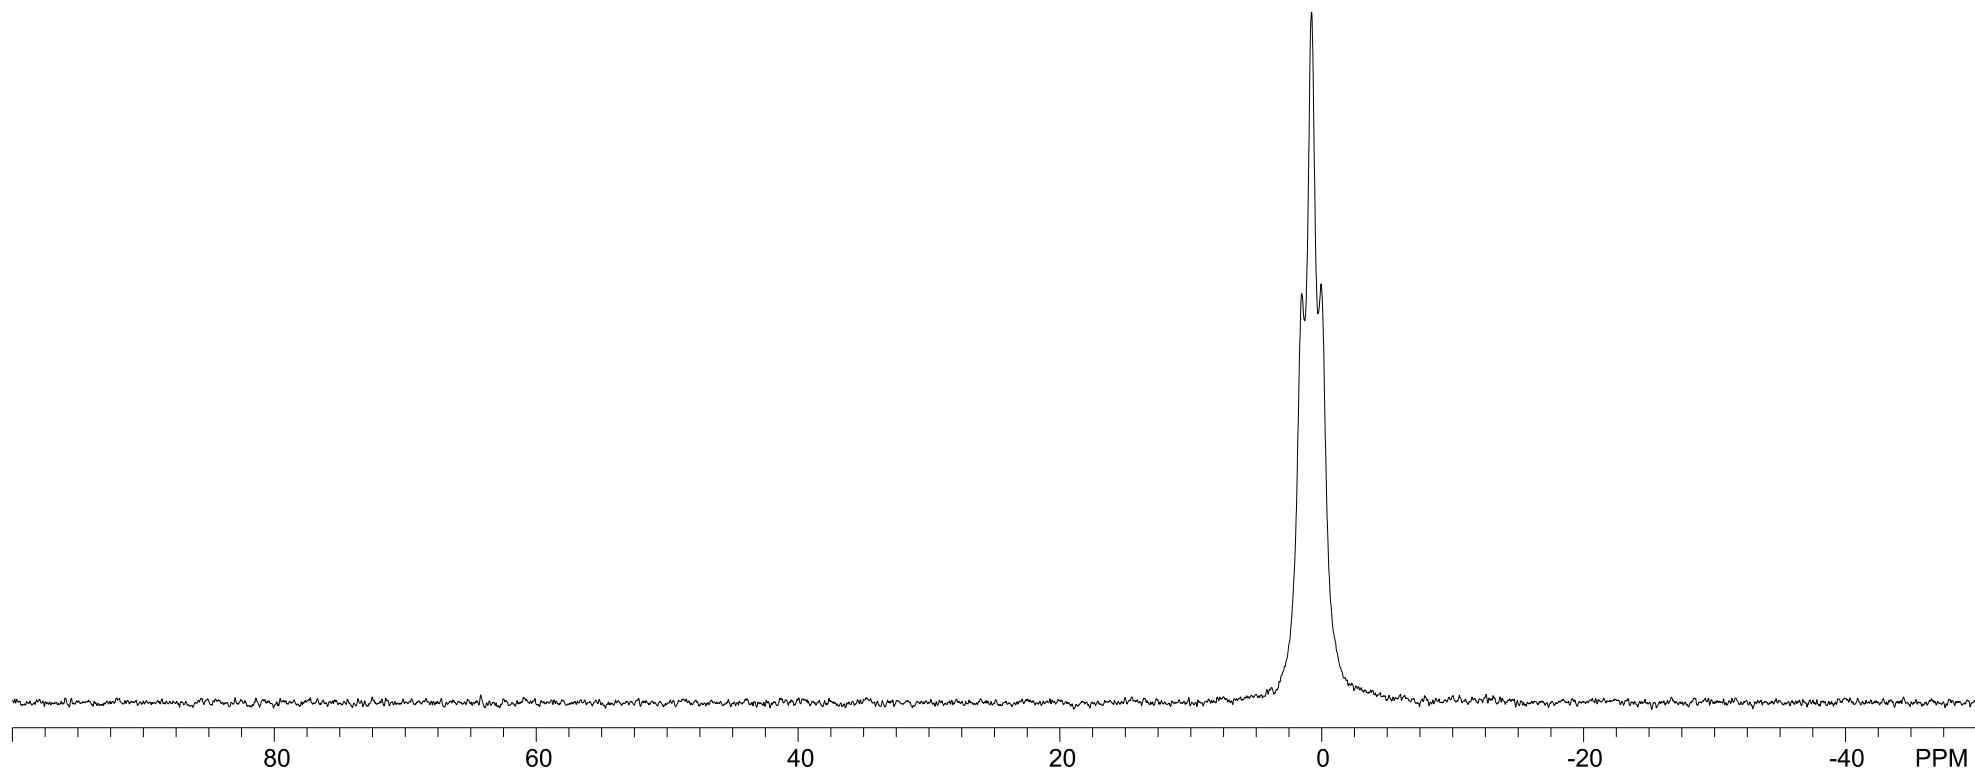

S90

$^{11}\text{B}\{^1\text{H}\}$  NMR (128 MHz),  
 $\text{CDCl}_3$



**46**

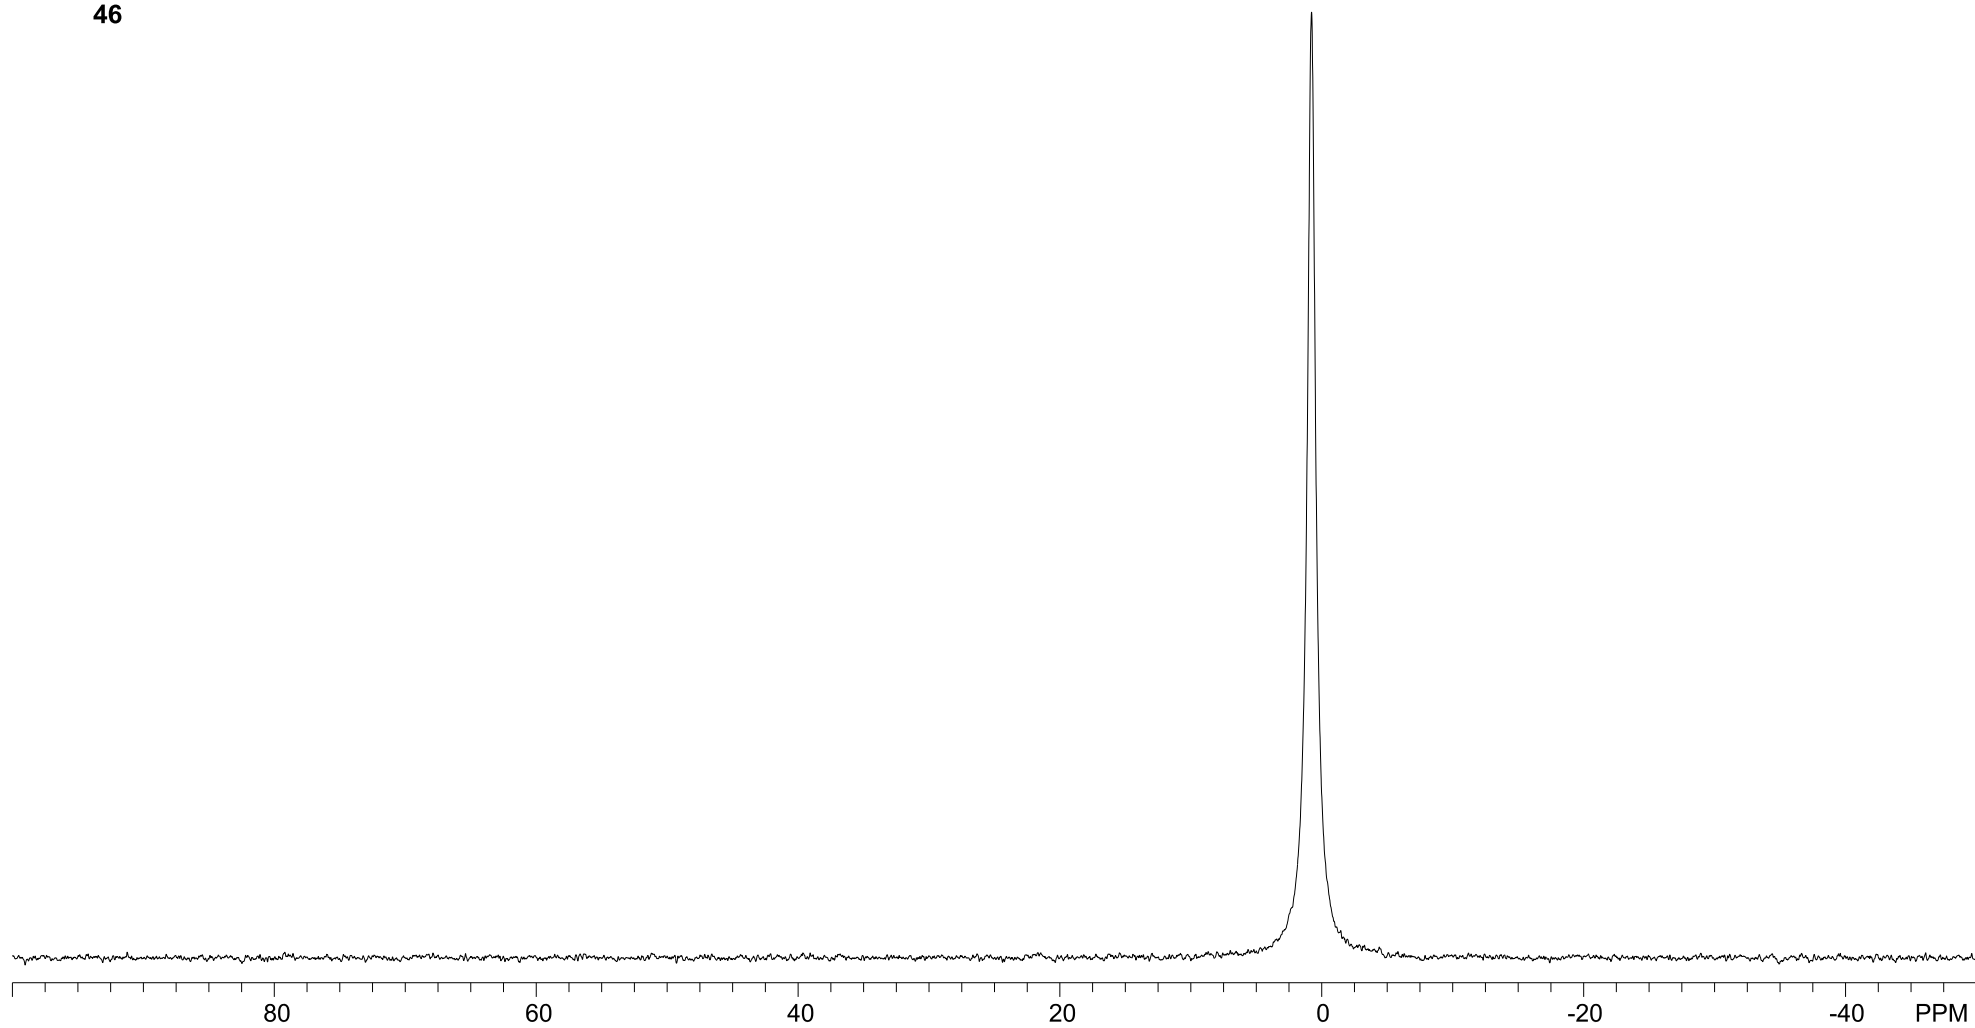

$^{13}\text{C}\{^1\text{H}\}$  NMR (101 MHz),  
 $\text{CDCl}_3$



46

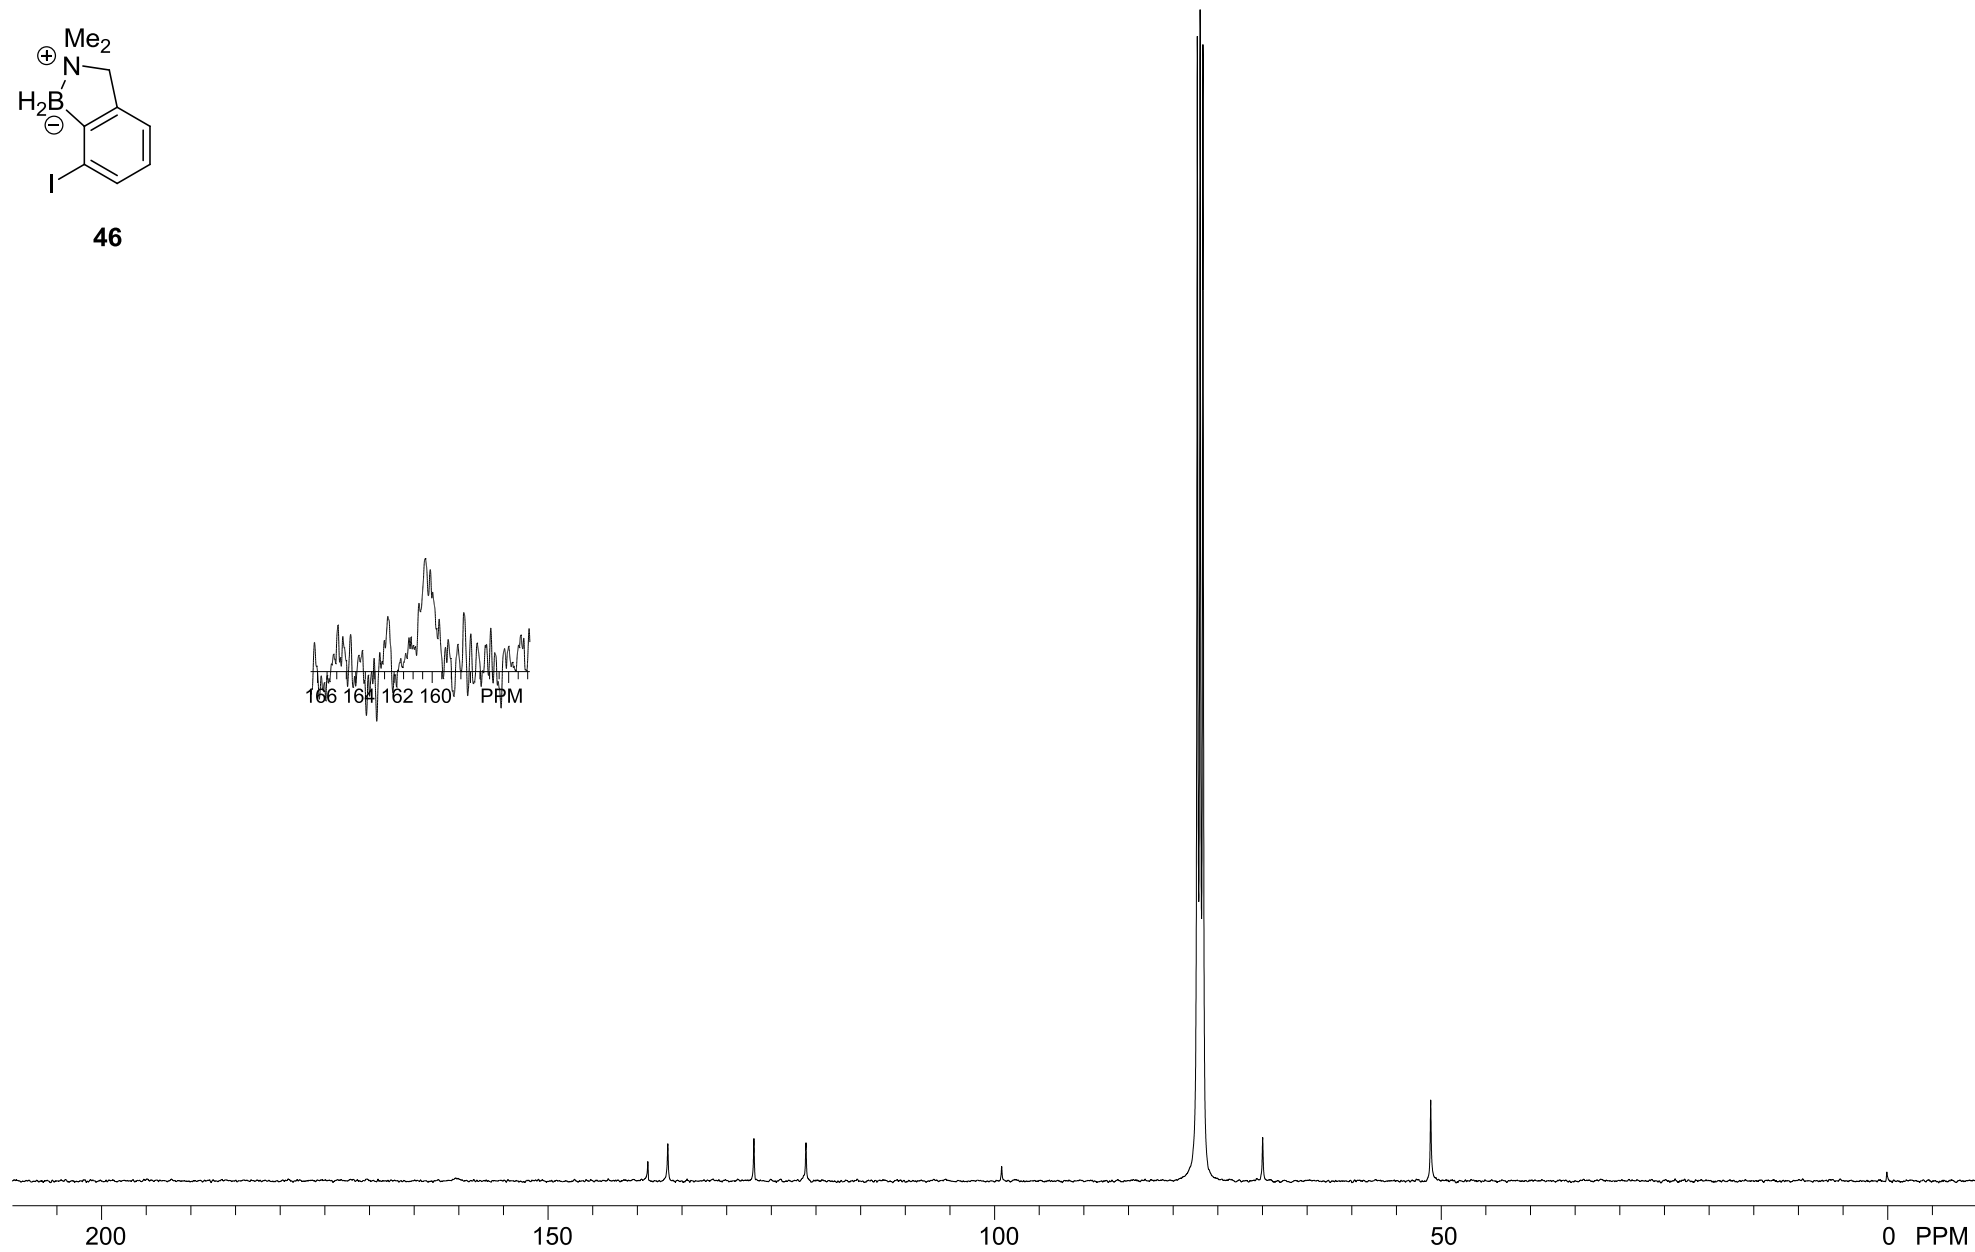

$^1\text{H}$  NMR (500 MHz),  
 $\text{CDCl}_3$

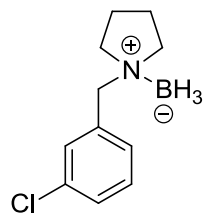

**47**

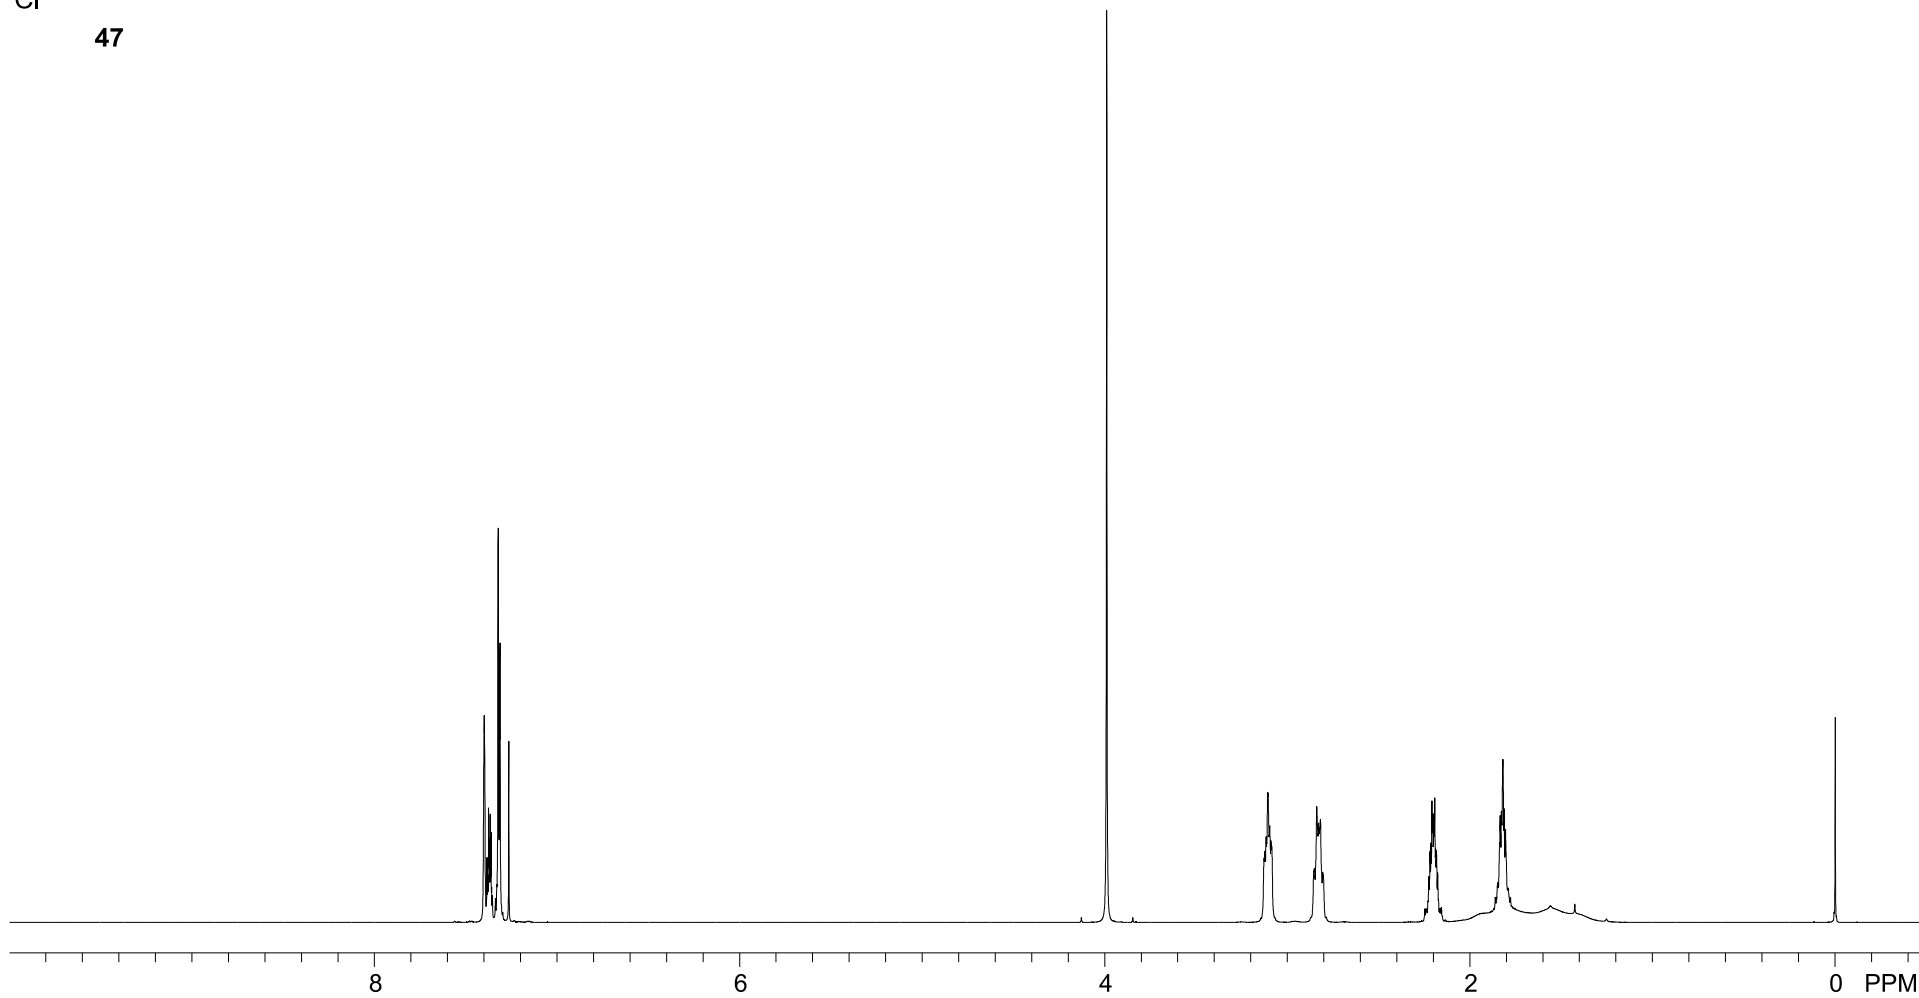

$^{11}\text{B}$  NMR (128 MHz),  
 $\text{CDCl}_3$



47

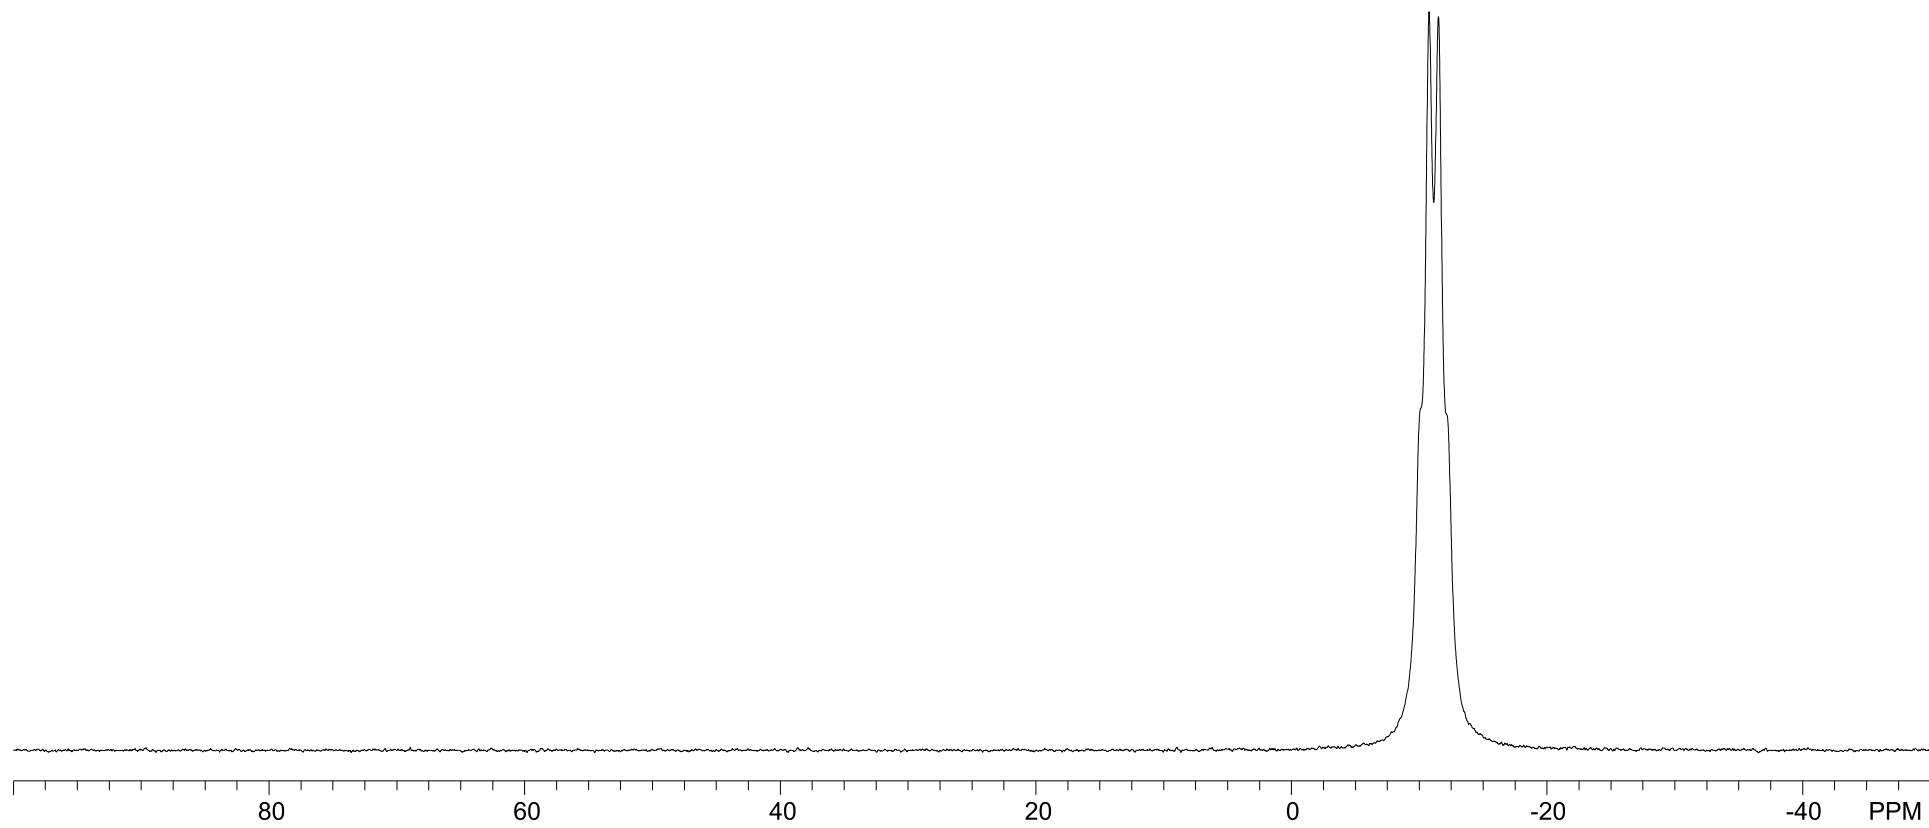

$^{11}\text{B}\{^1\text{H}\}$  NMR (128 MHz),  
 $\text{CDCl}_3$

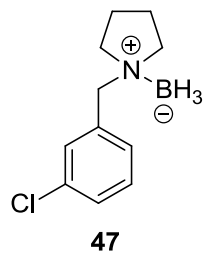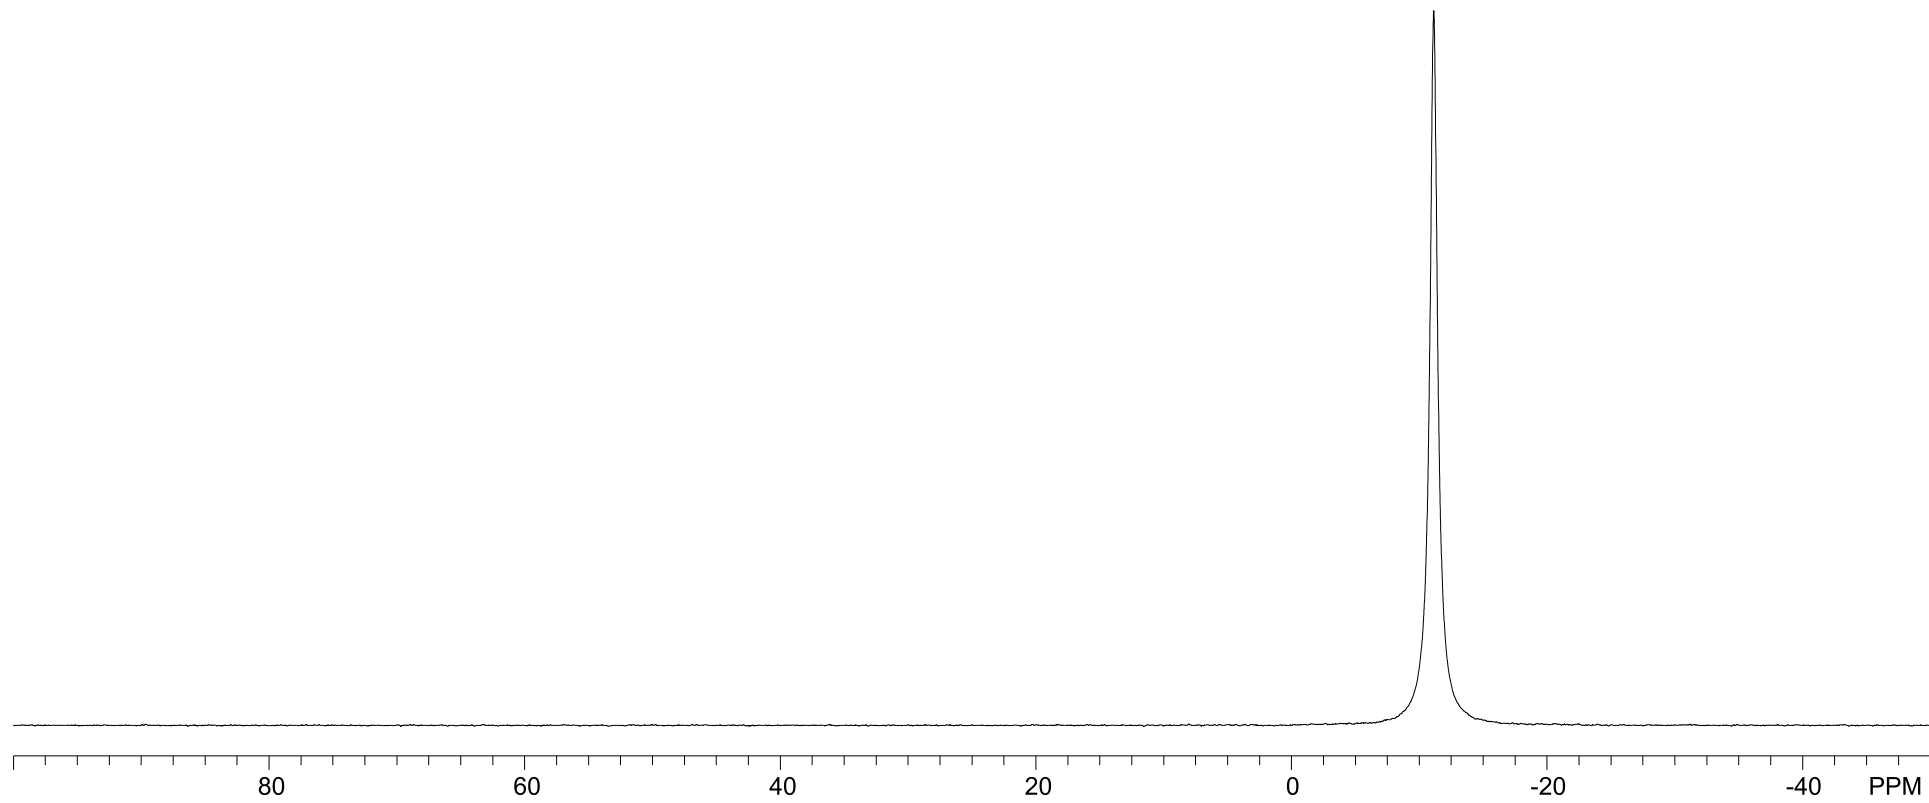

$^{13}\text{C}\{^1\text{H}\}$  NMR (101 MHz),  
 $\text{CDCl}_3$

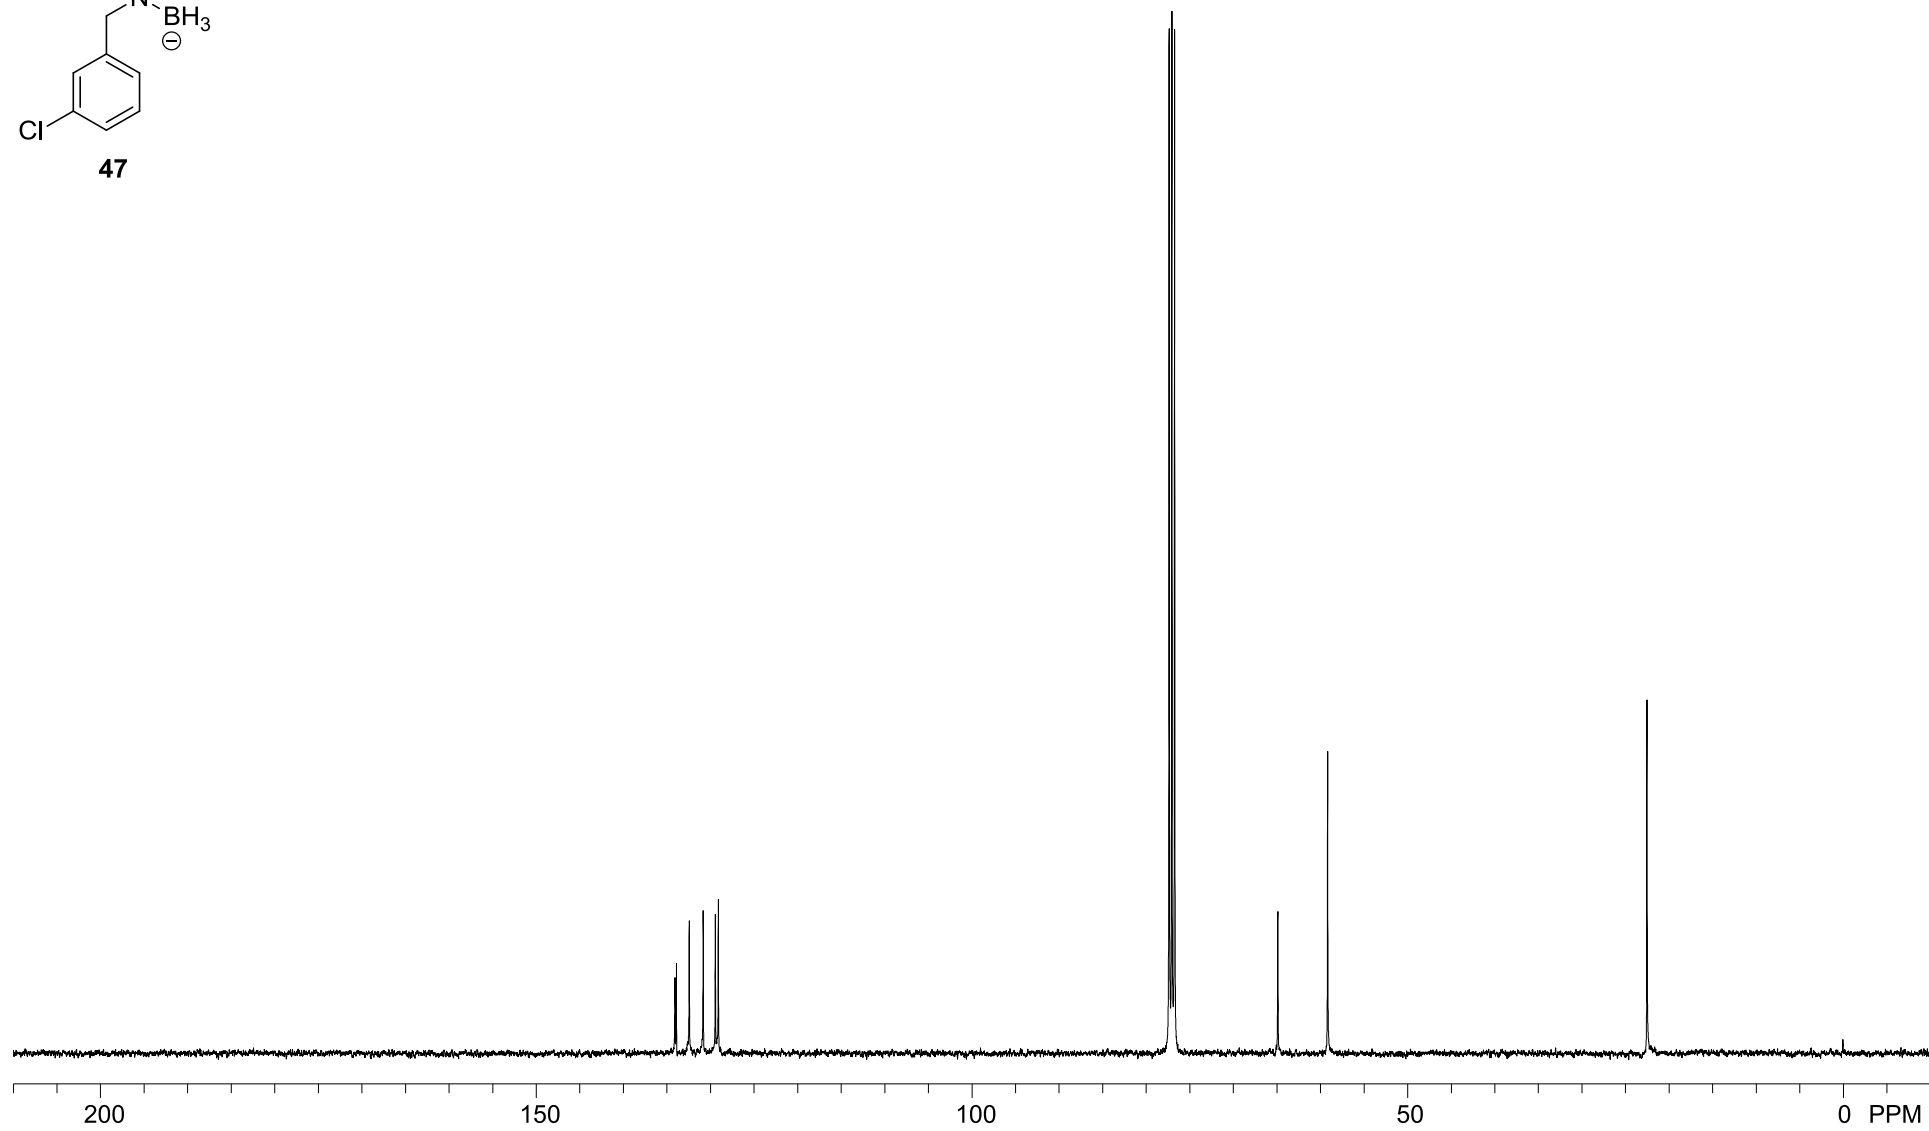



$^1\text{H}$  NMR (500 MHz),  
 $\text{CDCl}_3$

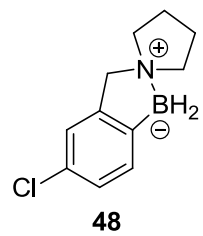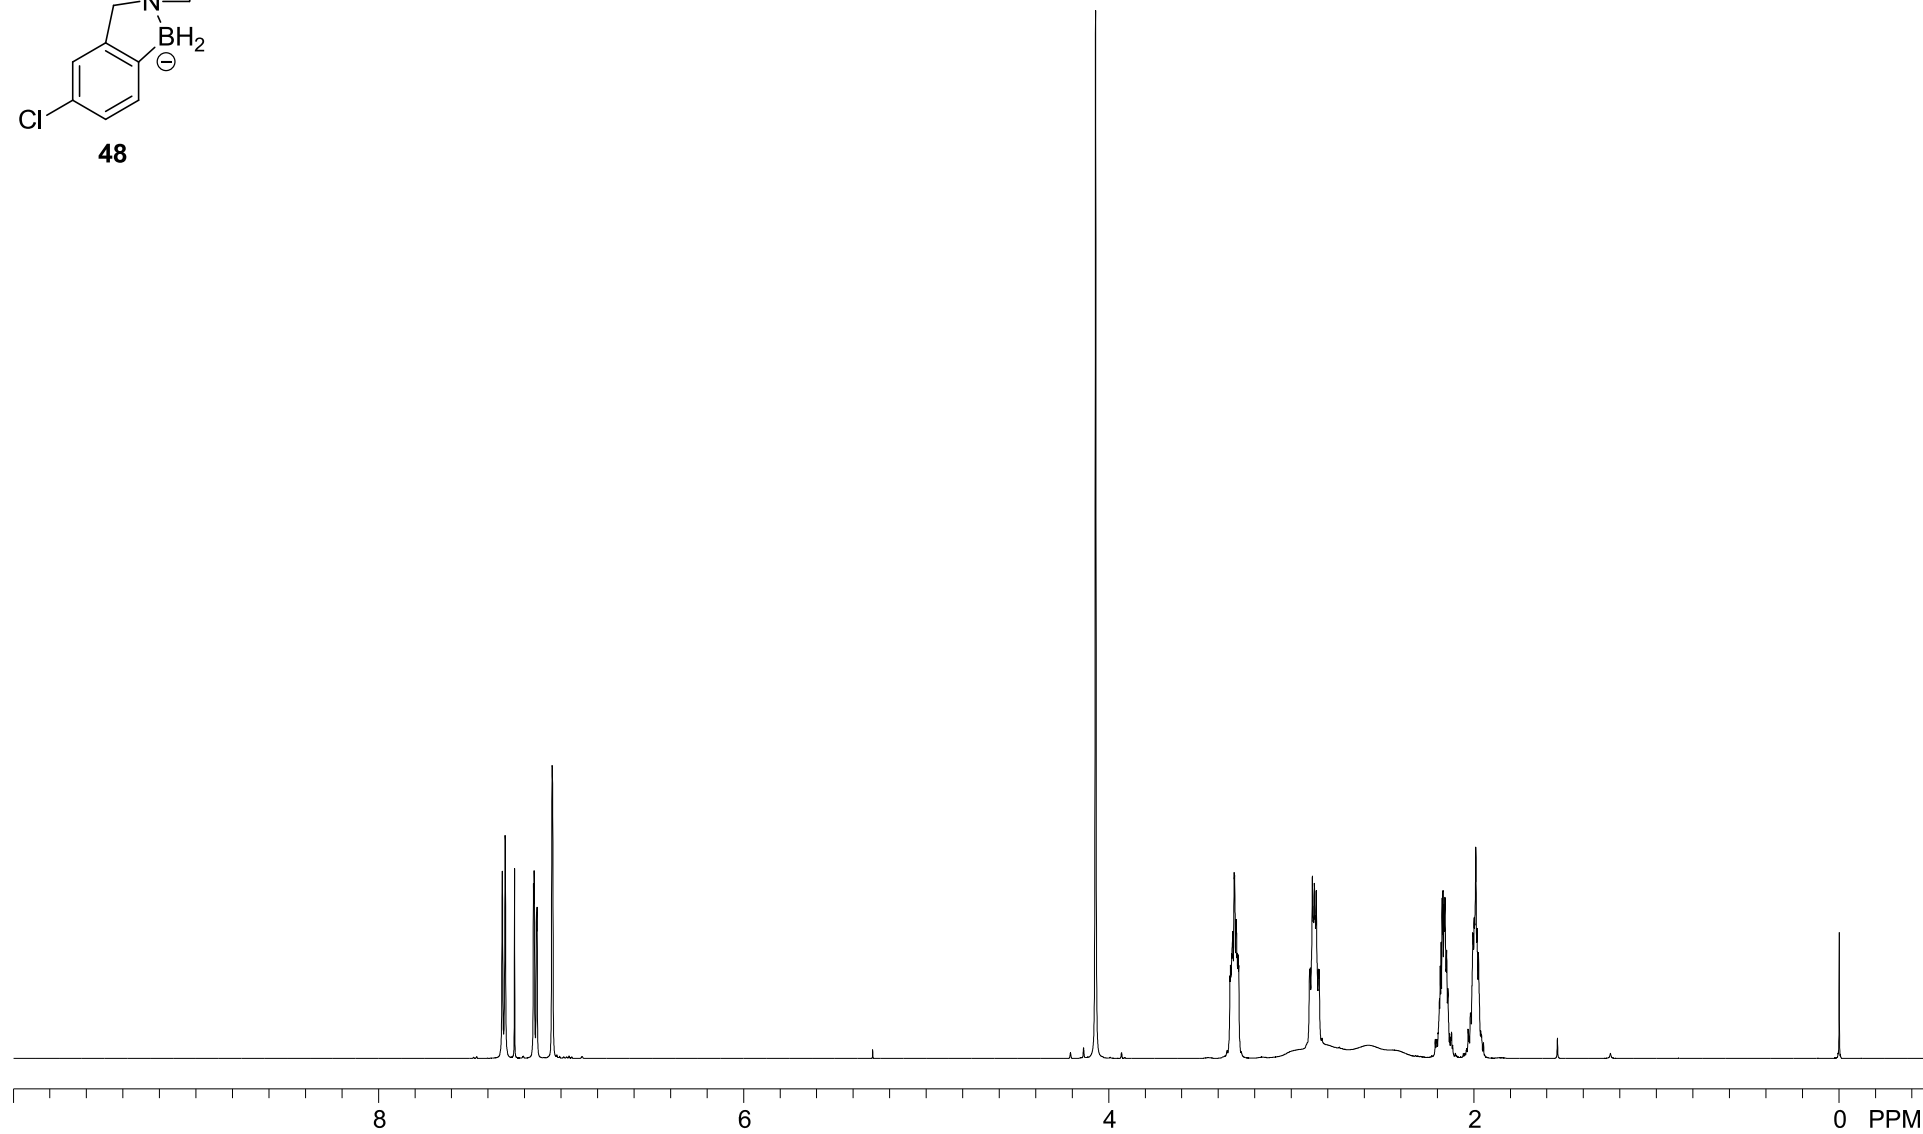

$^{11}\text{B}$  NMR (128 MHz),  
 $\text{CDCl}_3$

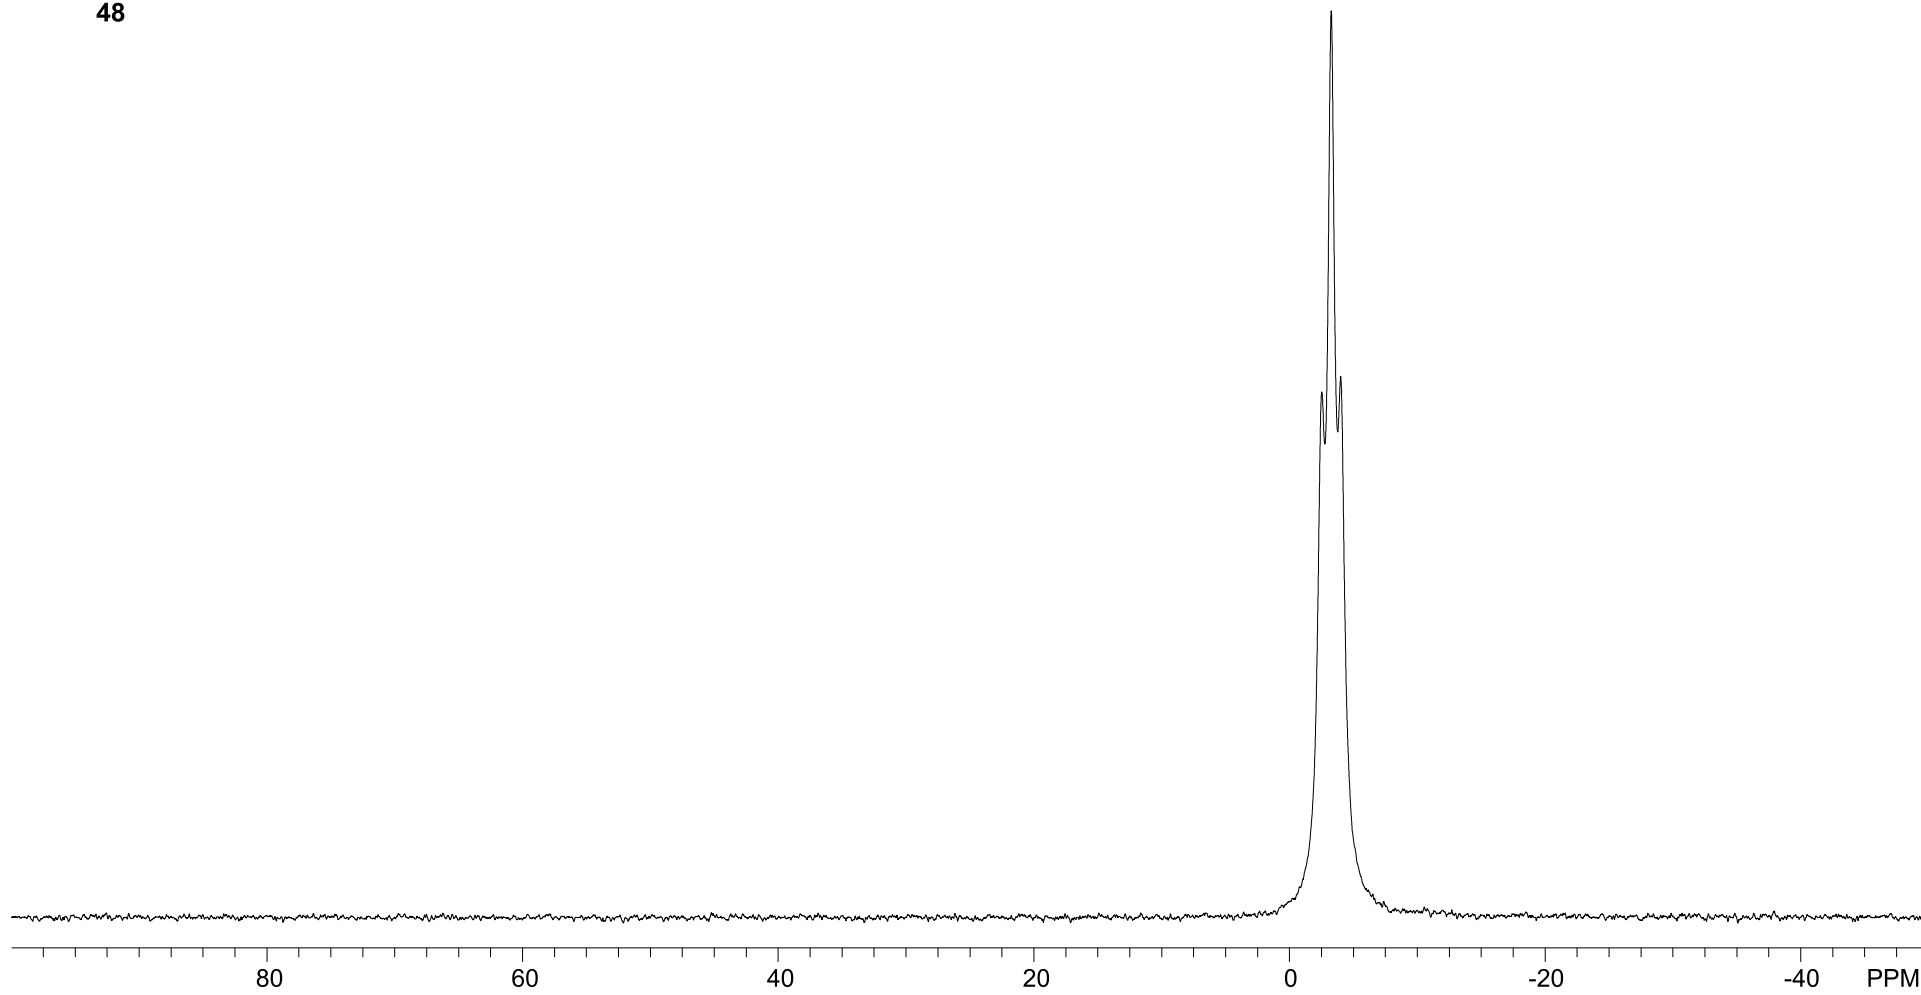

$^{11}\text{B}\{^1\text{H}\}$  NMR (128 MHz),  
 $\text{CDCl}_3$

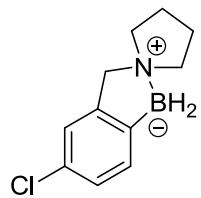

**48**

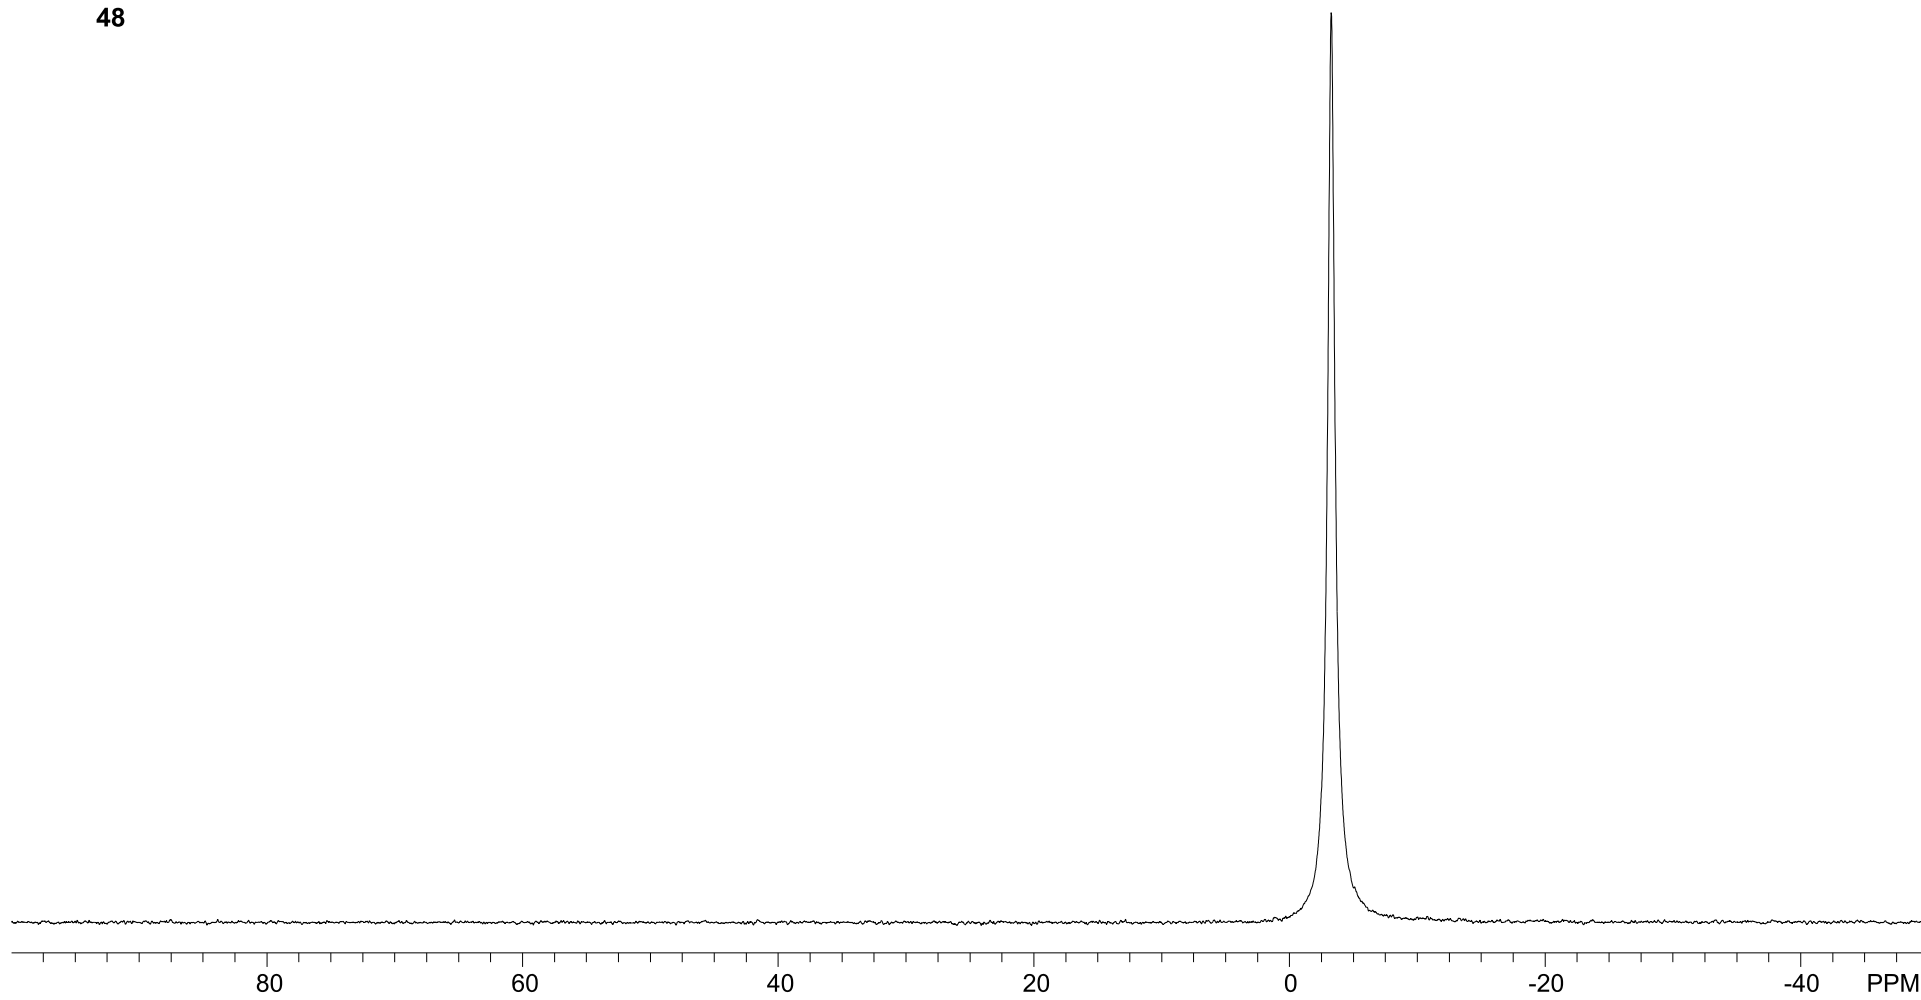

$^{13}\text{C}\{^1\text{H}\}$  NMR (101 MHz),  
 $\text{CDCl}_3$

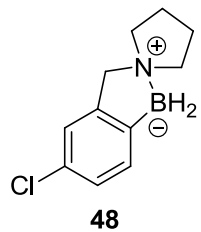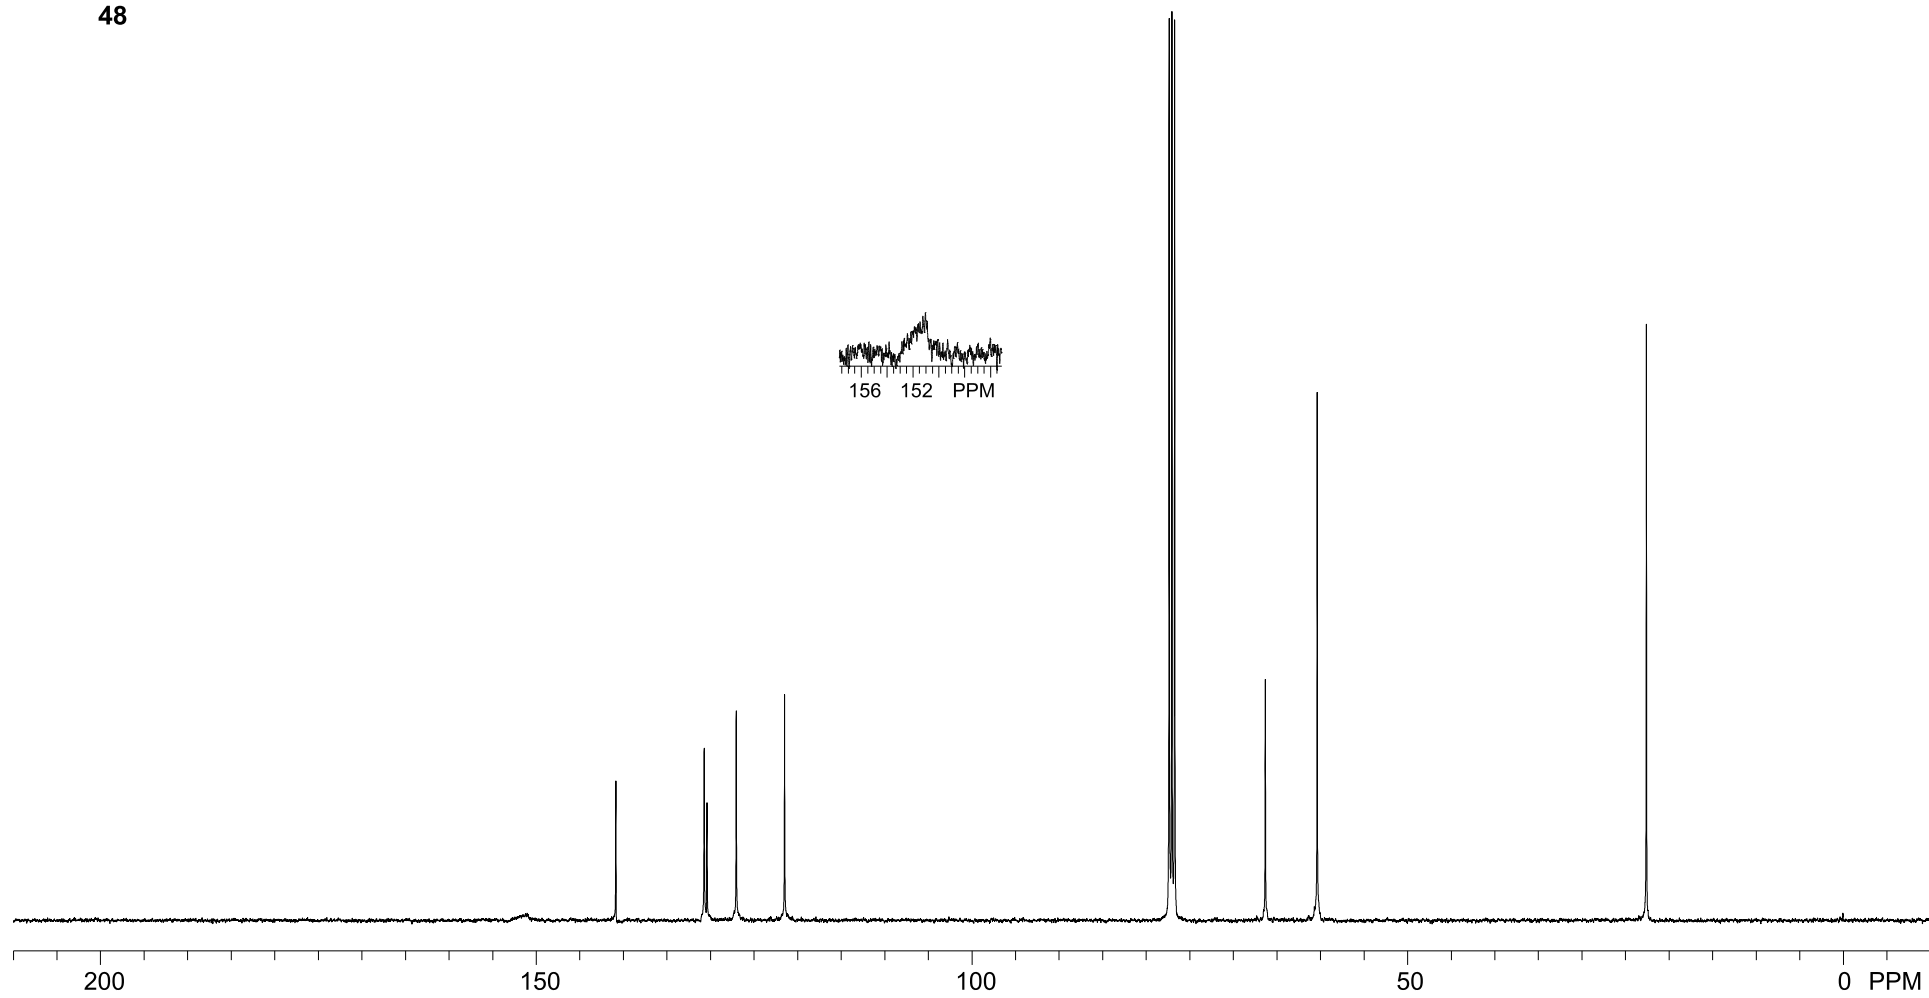

$^1\text{H}$  NMR (500 MHz),  
 $\text{CDCl}_3$

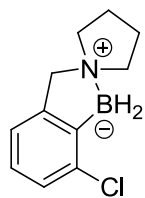

49

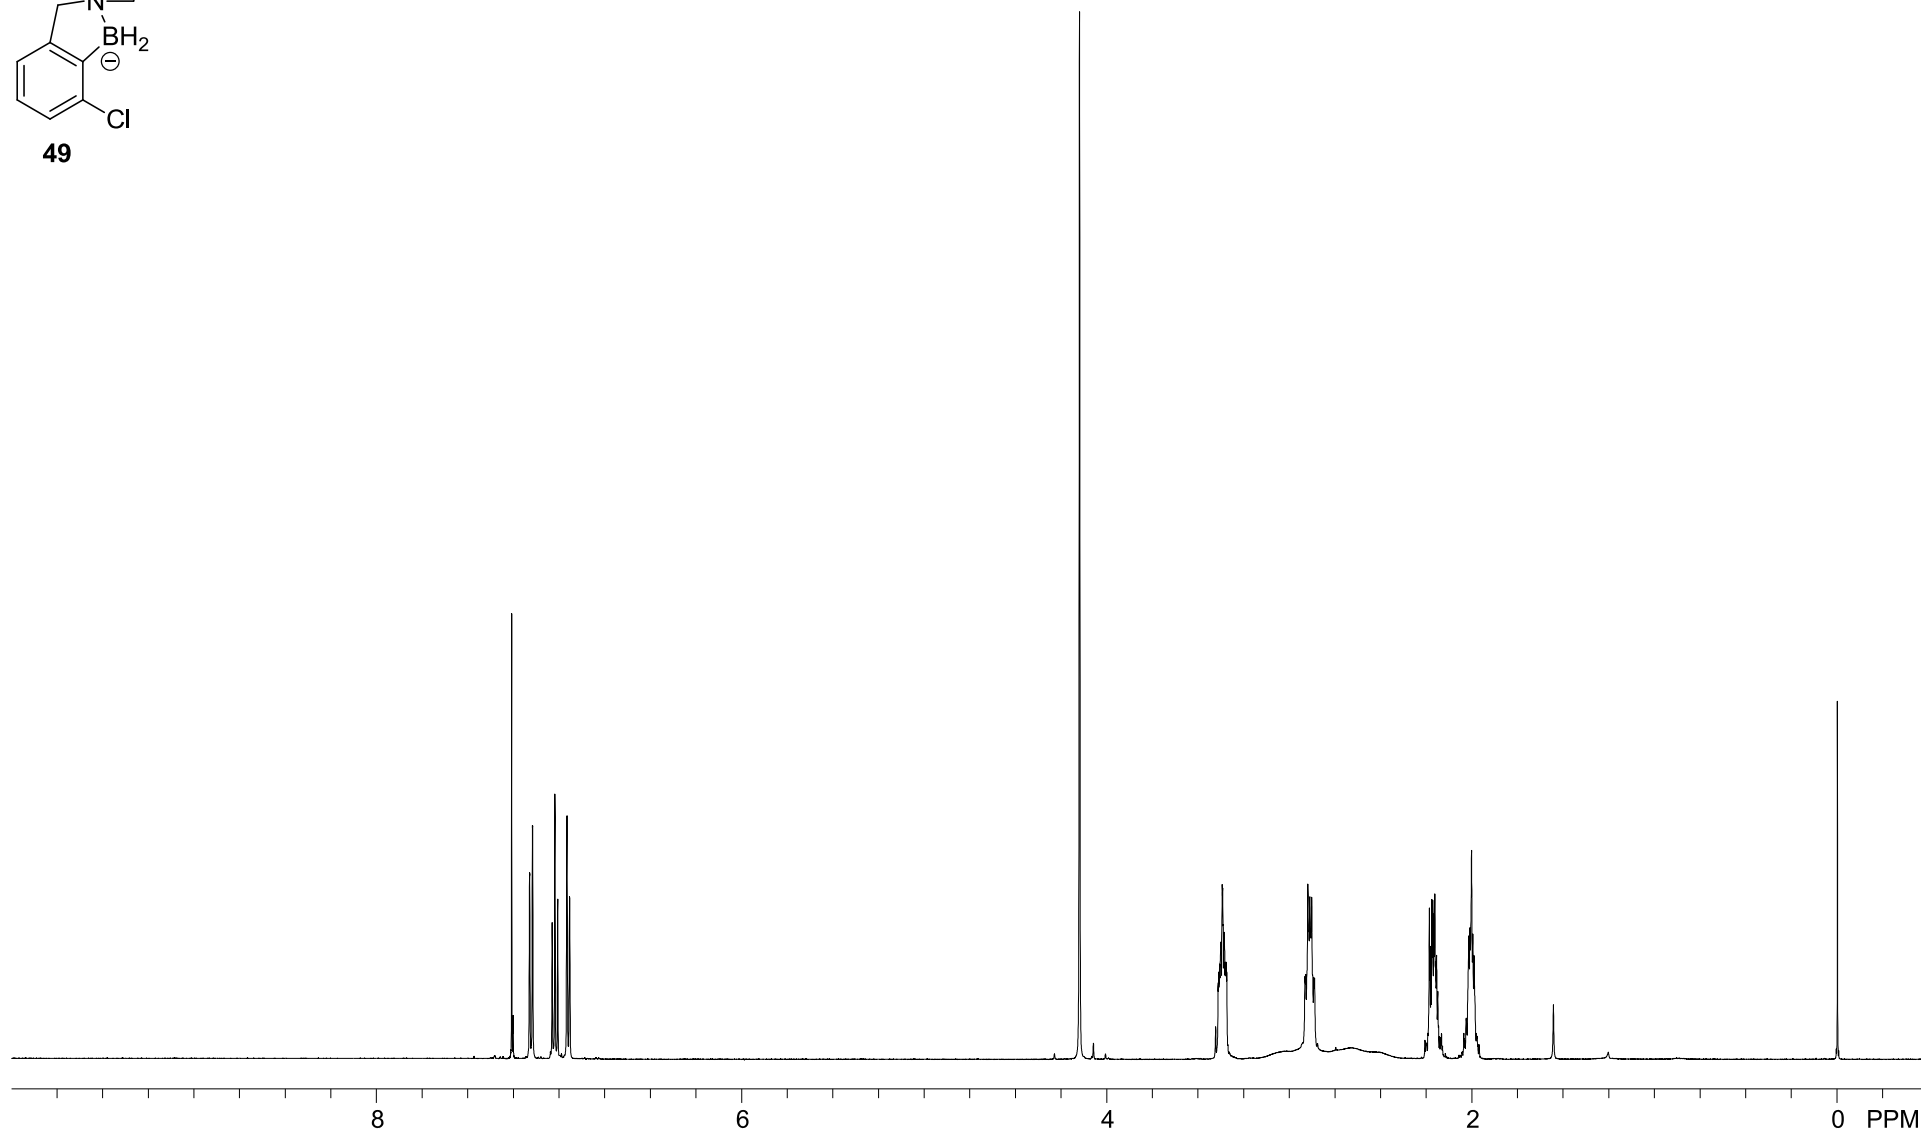

$^{11}\text{B}$  NMR (128 MHz),  
 $\text{CDCl}_3$



49

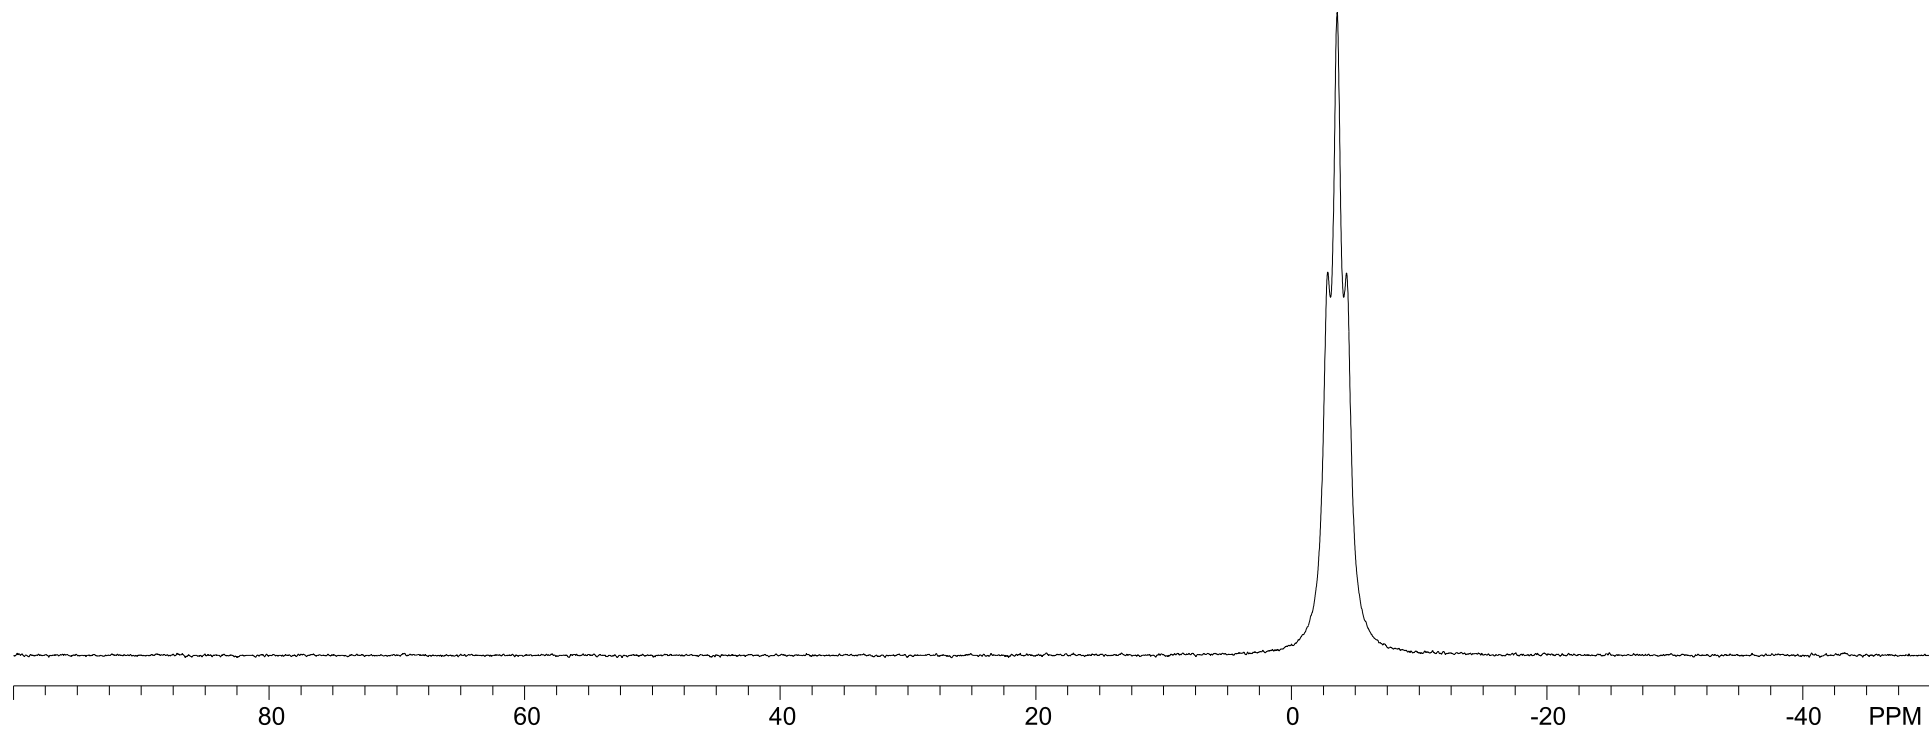

$^{11}\text{B}\{^1\text{H}\}$  NMR (128 MHz),  
 $\text{CDCl}_3$

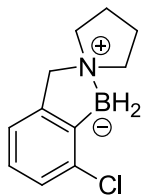

49

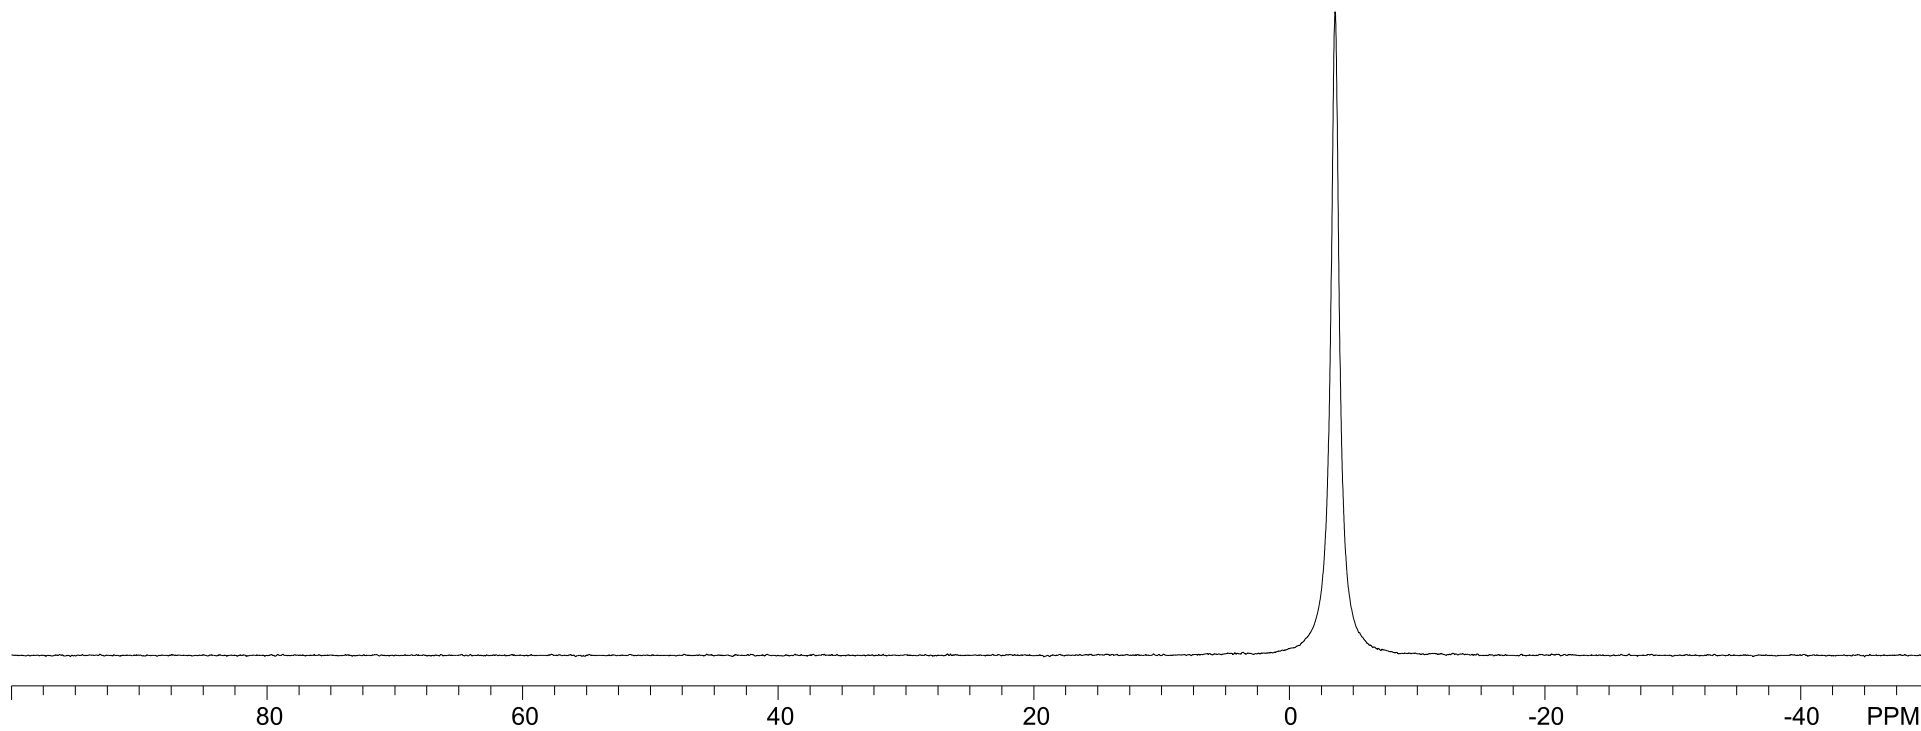

$^{13}\text{C}\{^1\text{H}\}$  NMR (101 MHz),  
 $\text{CDCl}_3$



49

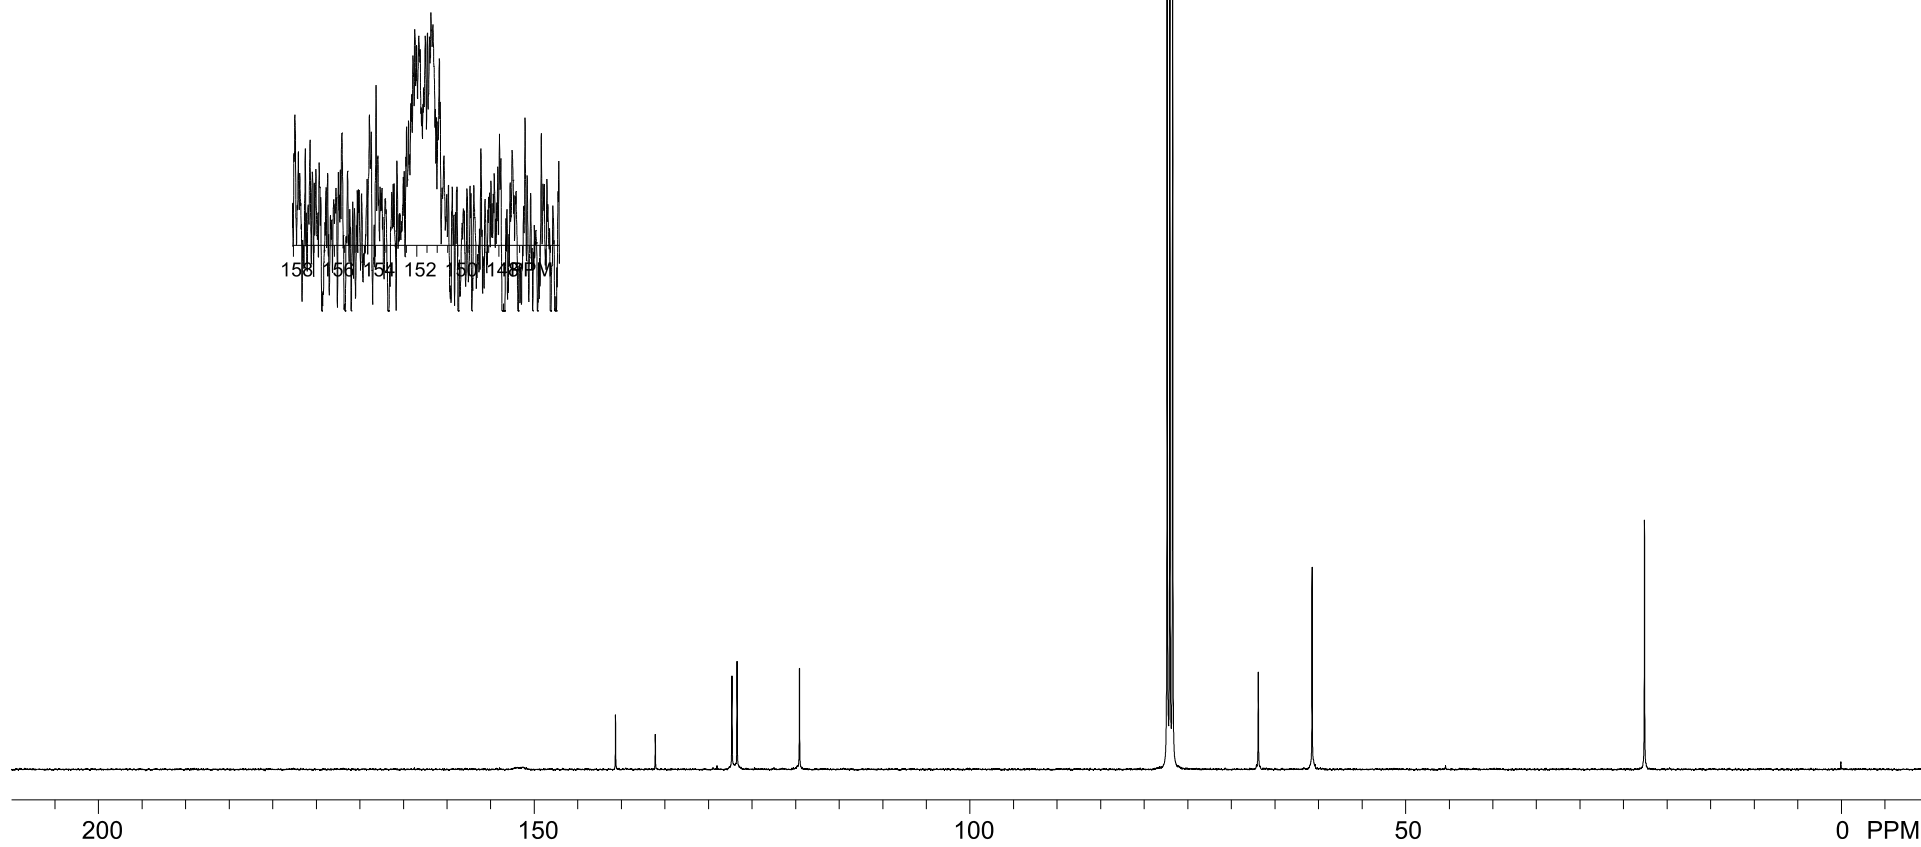



$^1\text{H}$  NMR (500 MHz),  
 $\text{CDCl}_3$

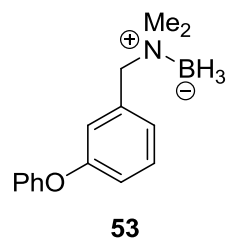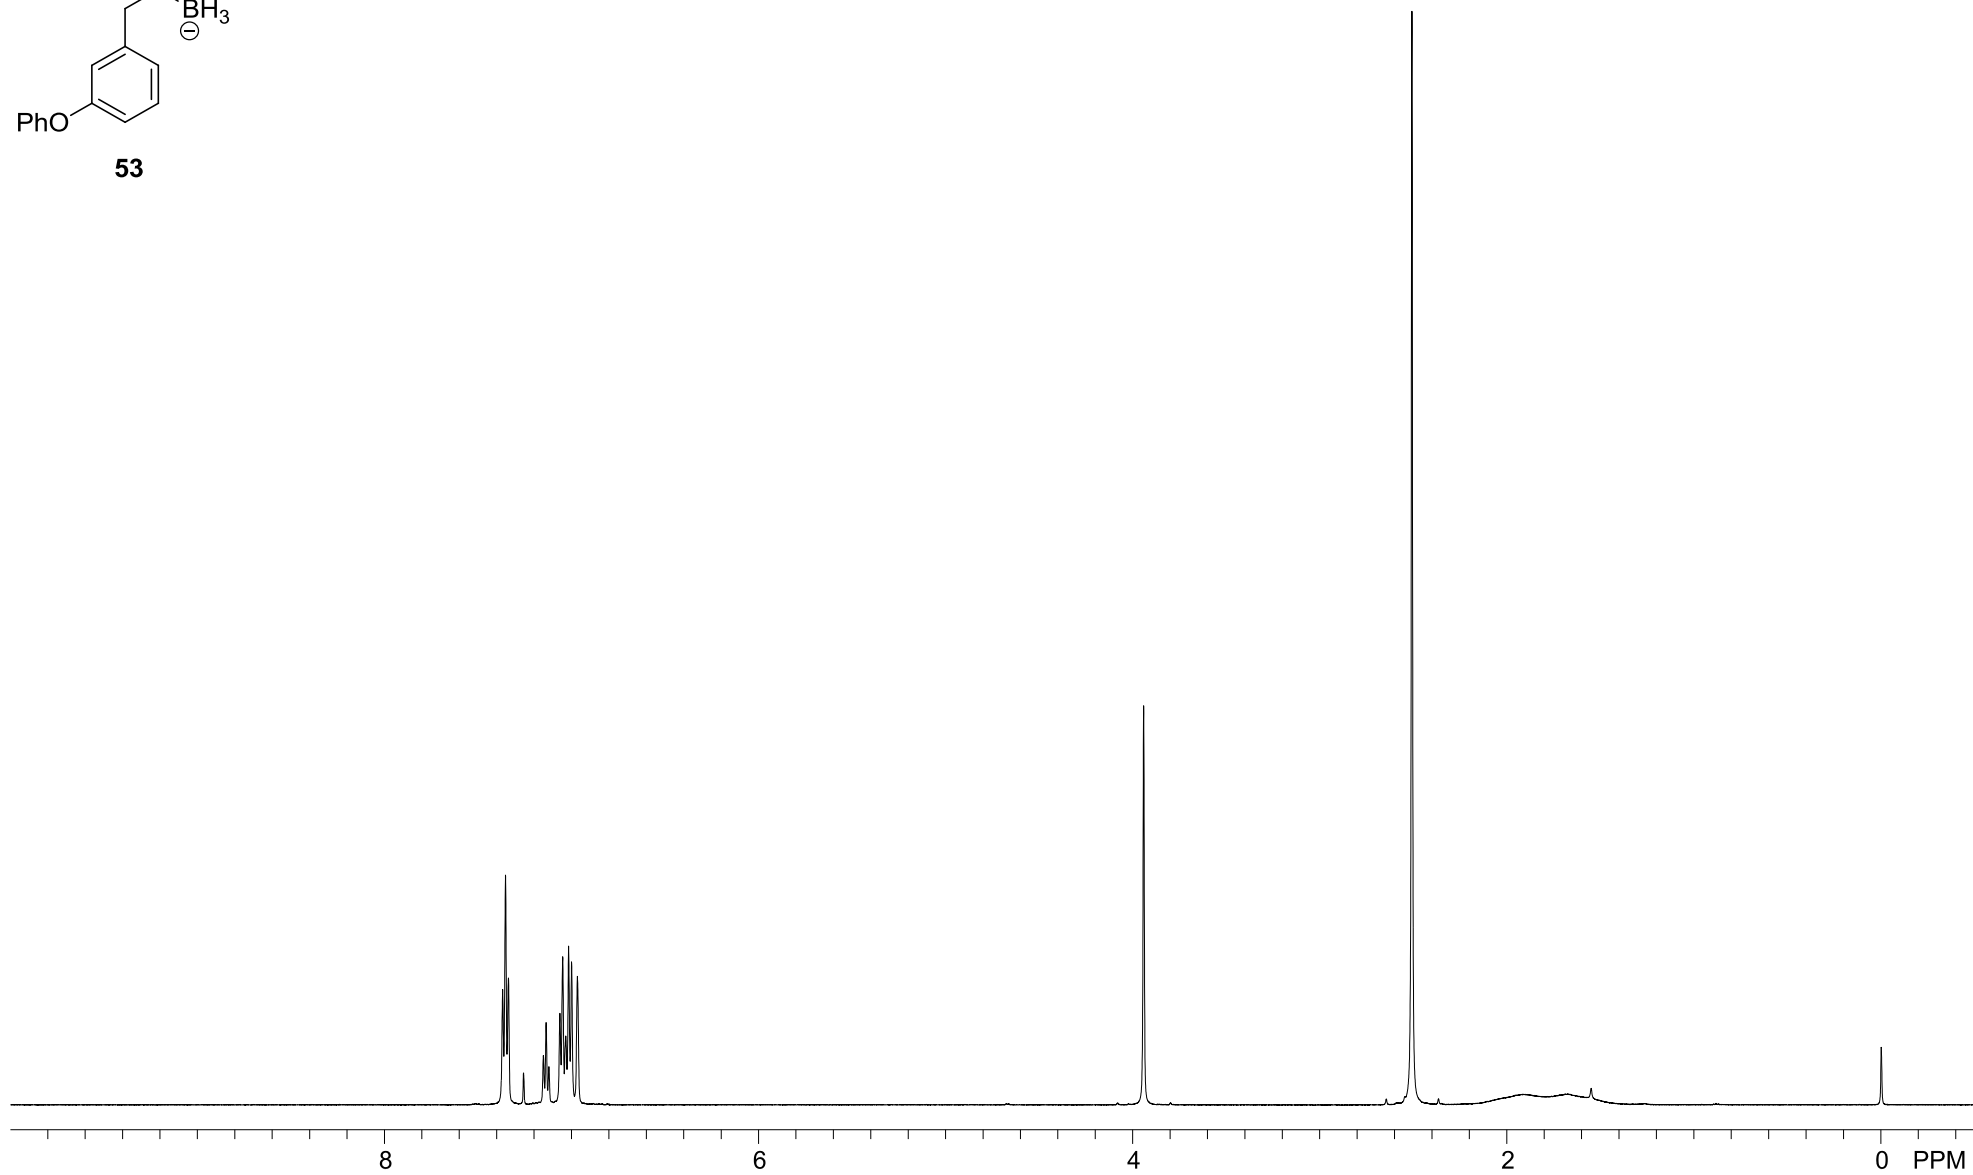

$^{11}\text{B}$  NMR (128 MHz),  
 $\text{CDCl}_3$

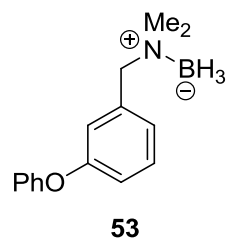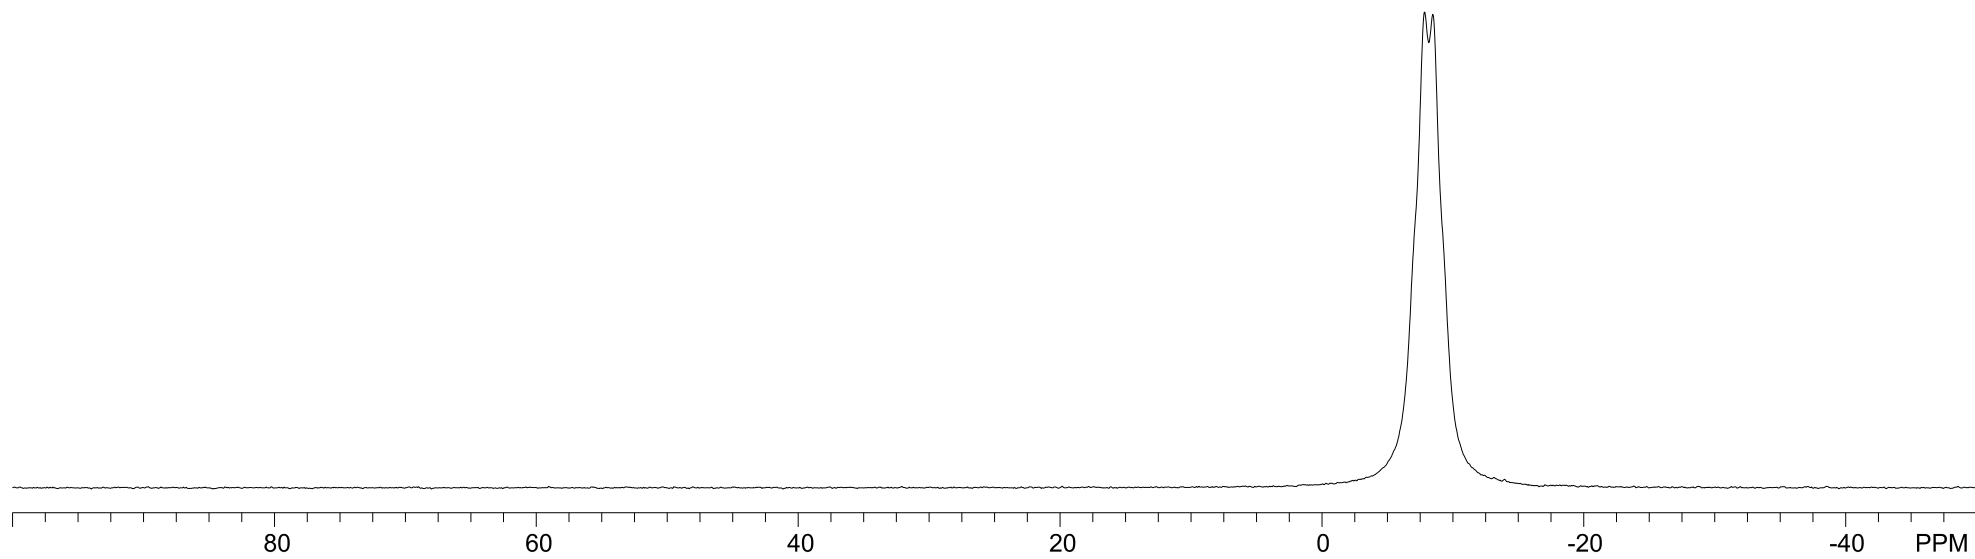

$^{11}\text{B}\{^1\text{H}\}$  NMR (128 MHz),  
 $\text{CDCl}_3$

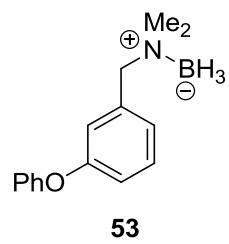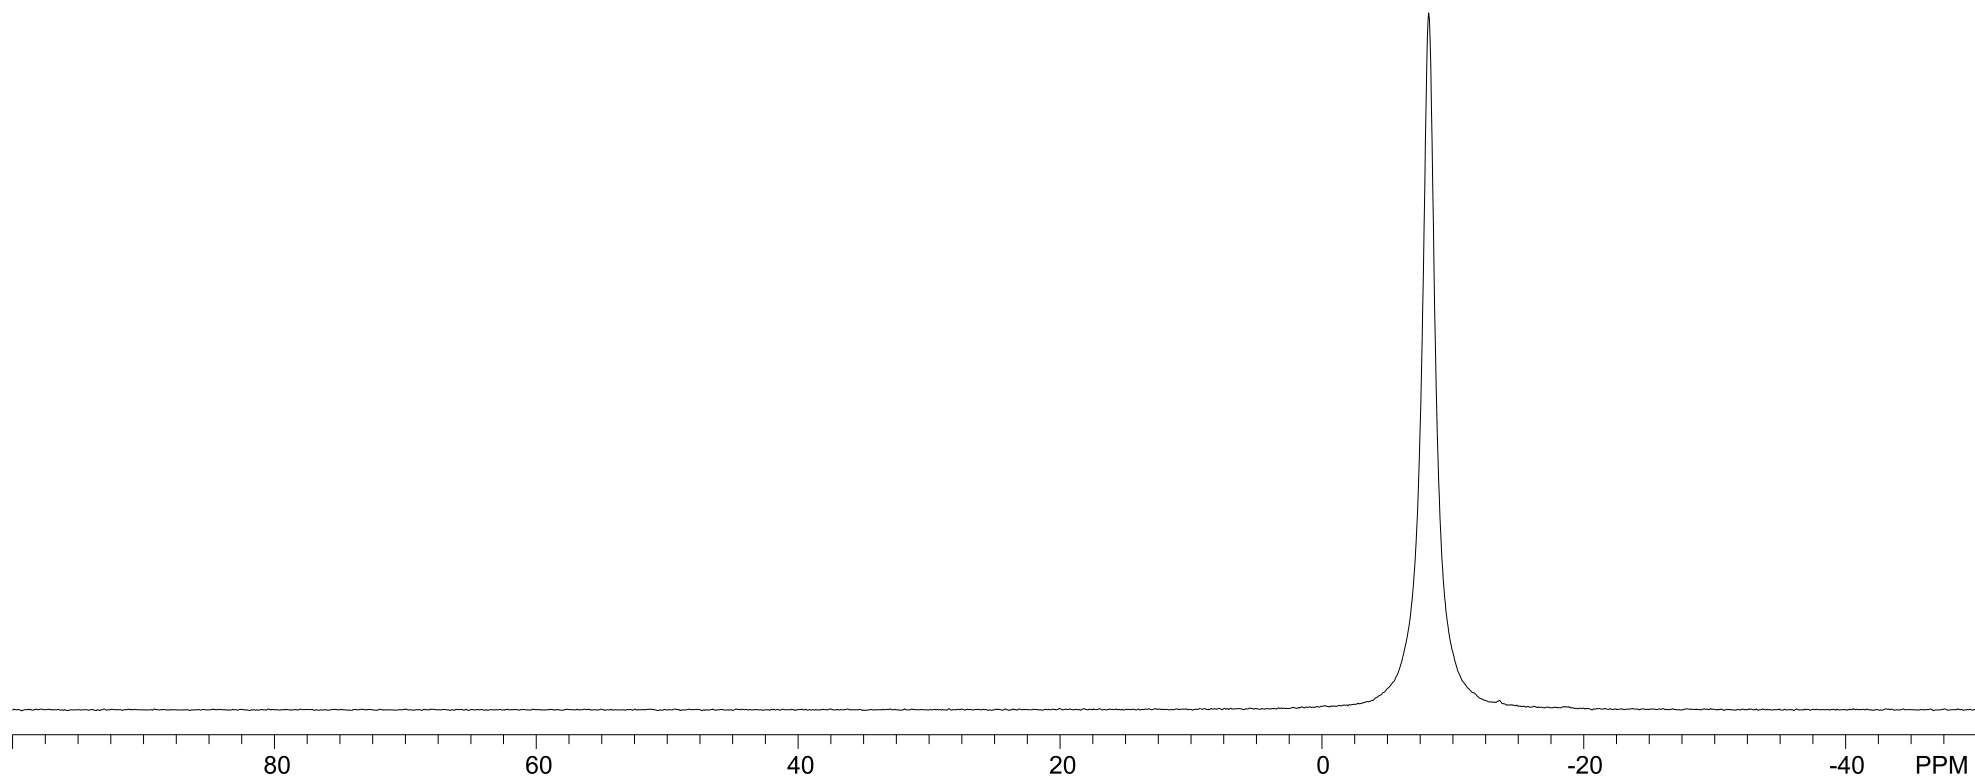

$^{13}\text{C}\{^1\text{H}\}$  NMR (101 MHz),  
 $\text{CDCl}_3$

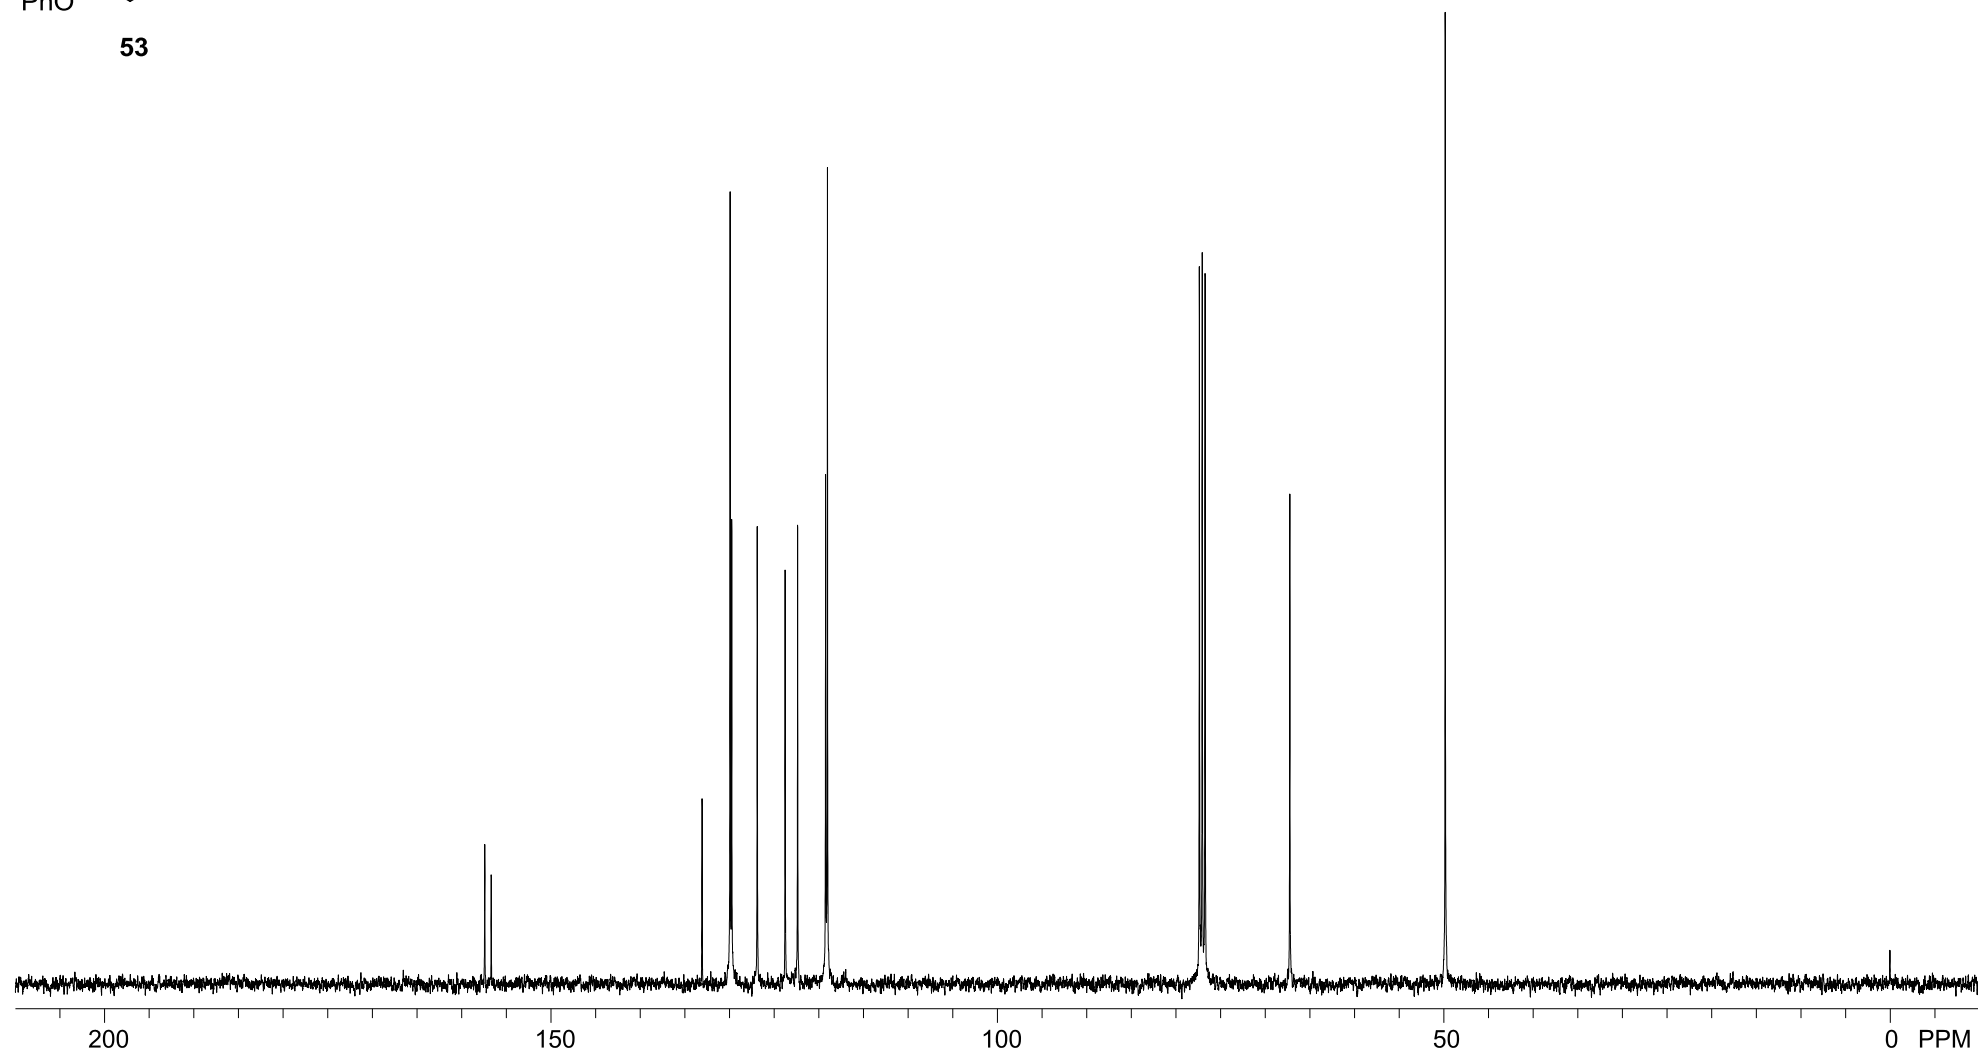

$^1\text{H}$  NMR (700 MHz),  
 $\text{CDCl}_3$

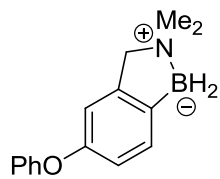

**54**

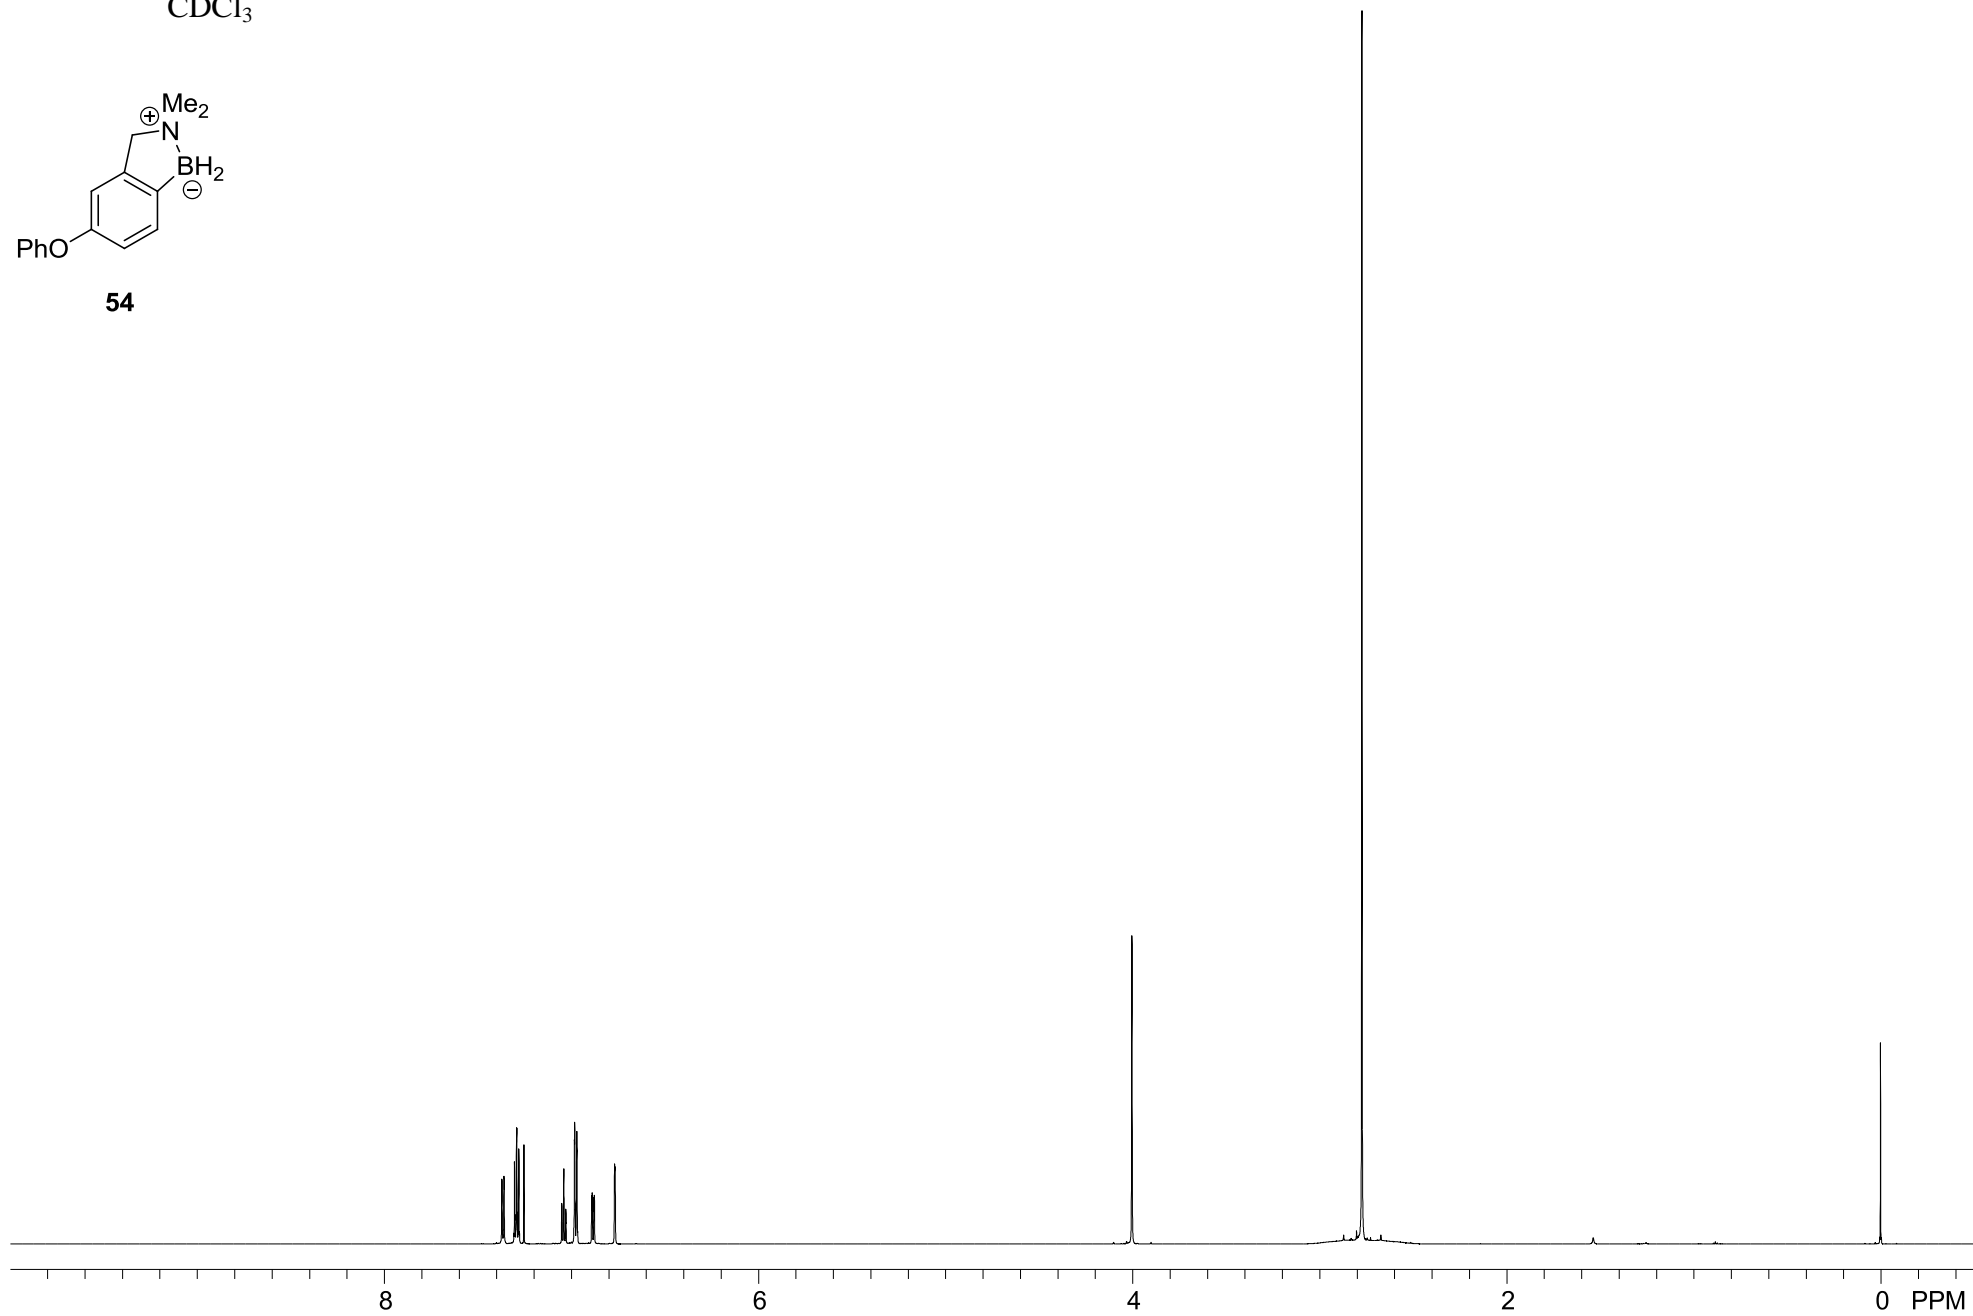

$^{11}\text{B}$  NMR (128 MHz),  
 $\text{CDCl}_3$

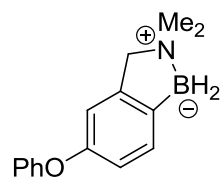

54

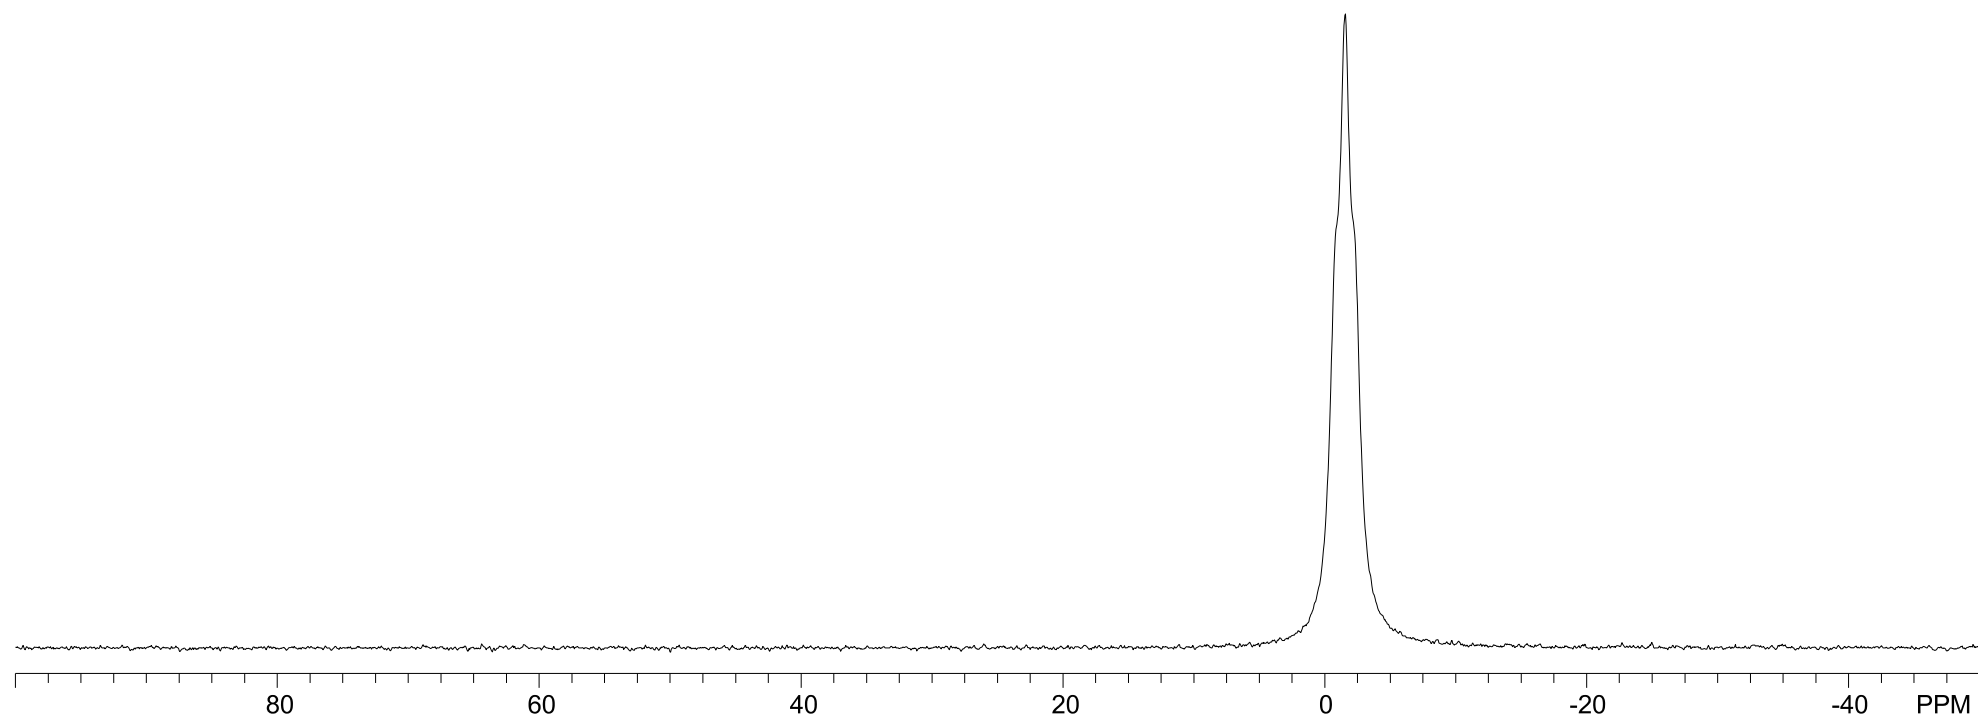

S110

$^{11}\text{B}\{^1\text{H}\}$  NMR (128 MHz),  
 $\text{CDCl}_3$

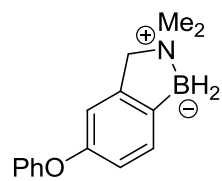

**54**

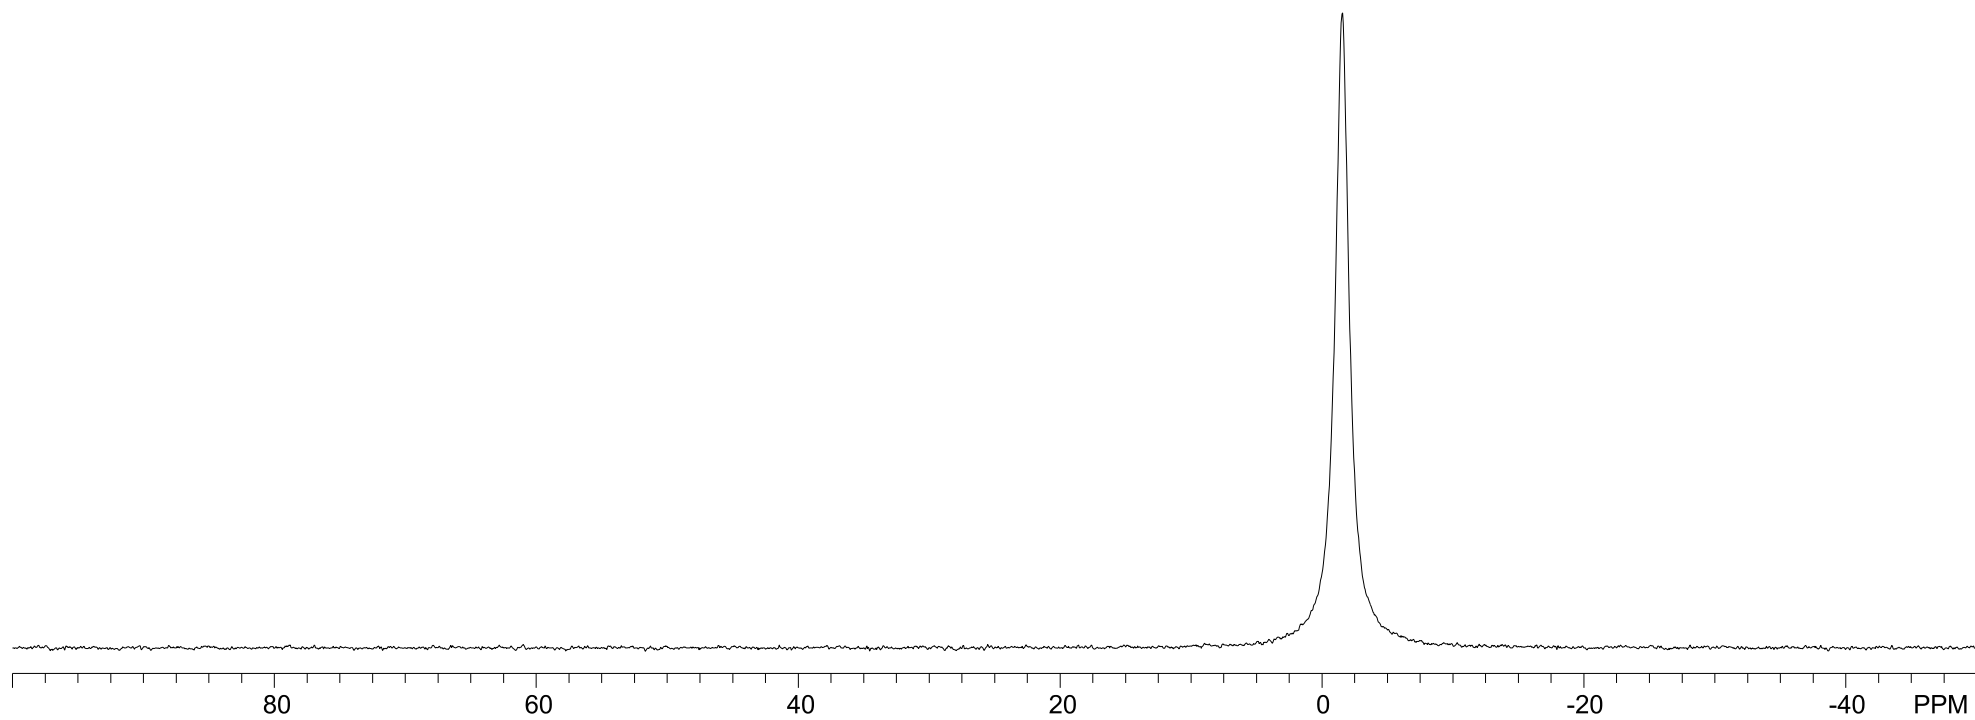

S111





$^1\text{H}$  NMR (700 MHz),  
 $\text{CDCl}_3$

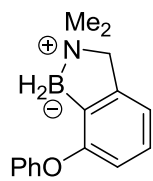

**55**

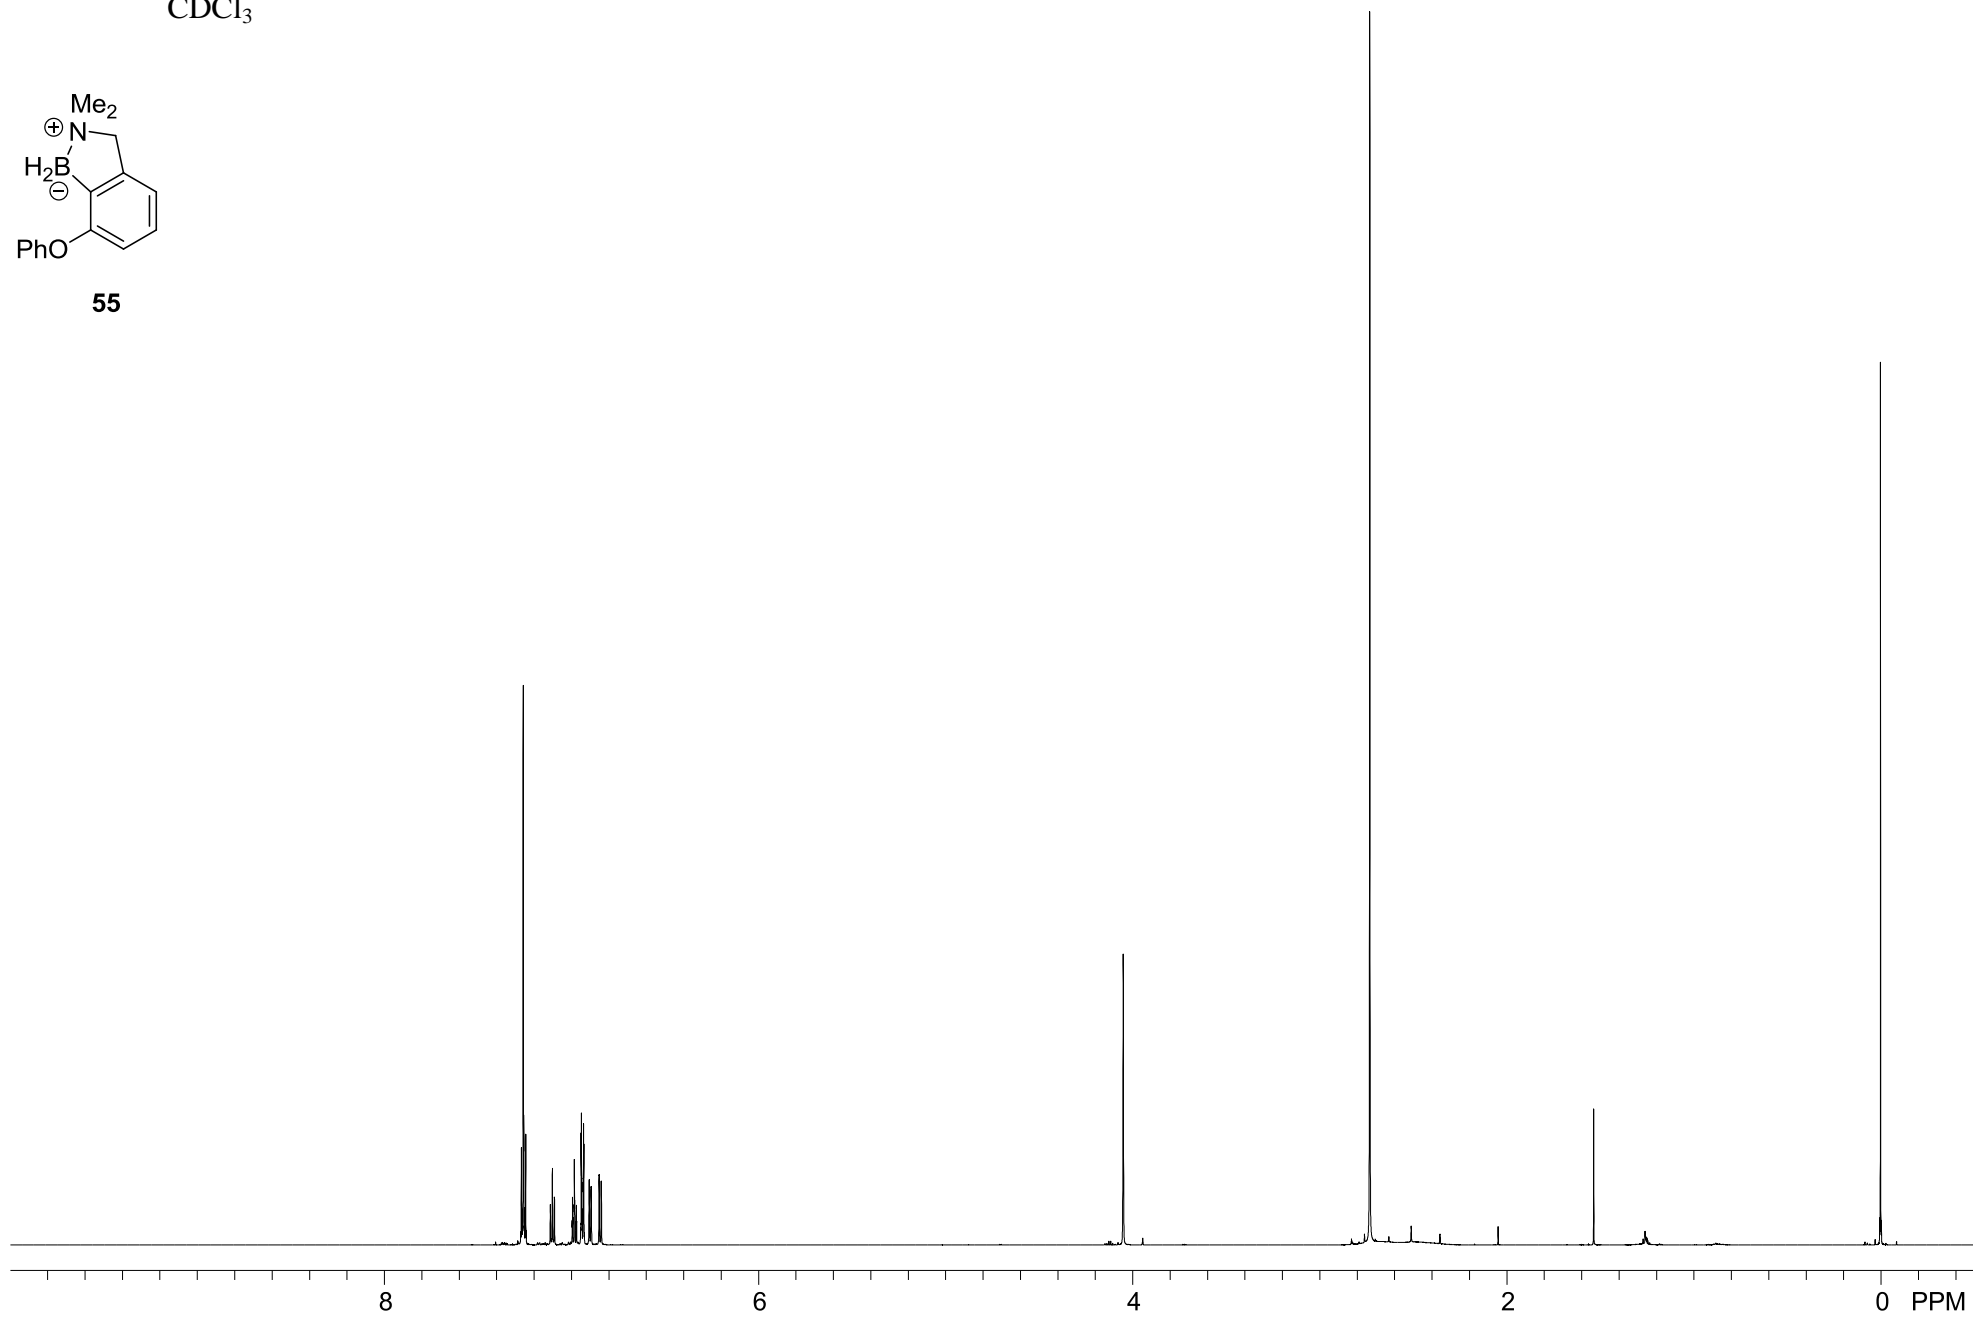

S113

$^{11}\text{B}$  NMR (225 MHz),  
 $\text{CDCl}_3$

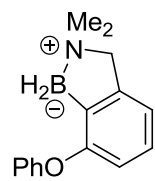

**55**

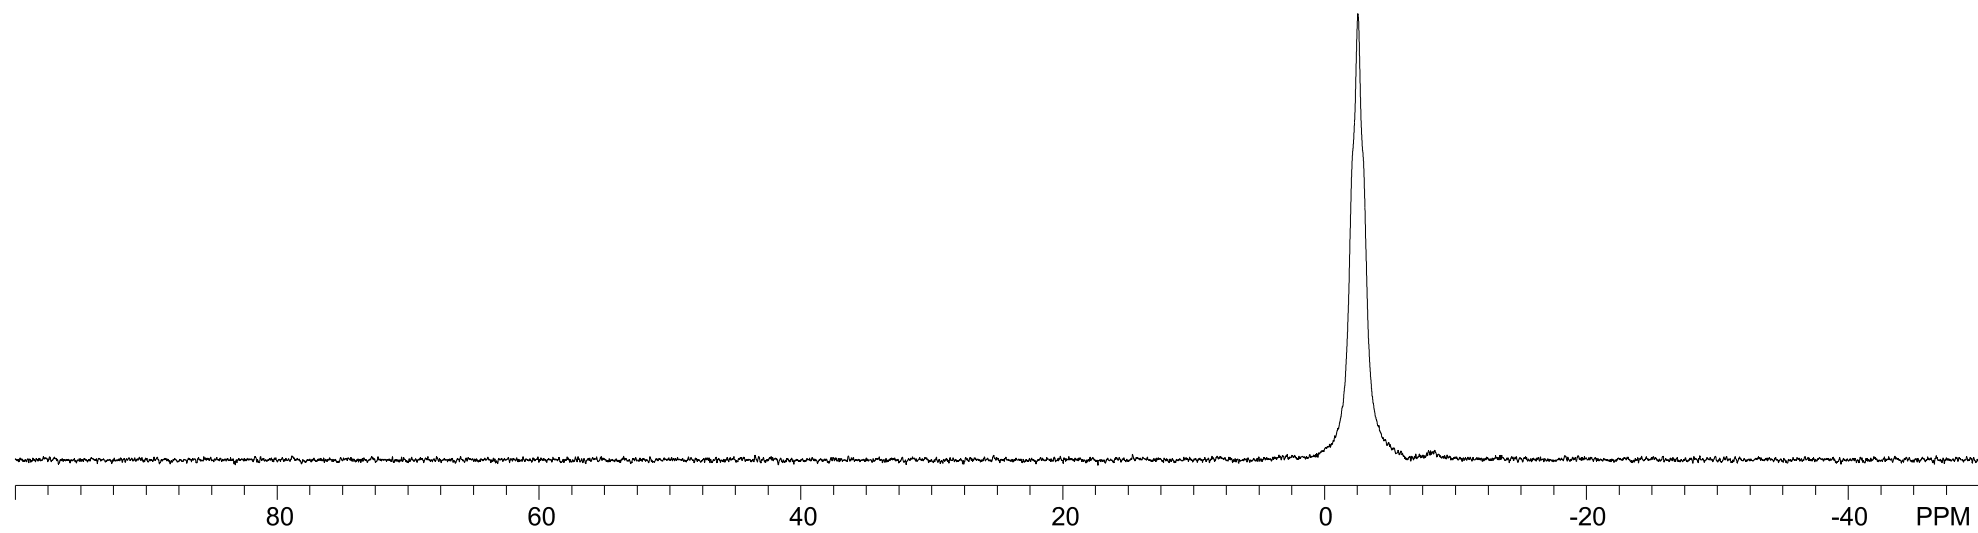

S114

$^{11}\text{B}\{^1\text{H}\}$  NMR (225 MHz),  
 $\text{CDCl}_3$



**55**

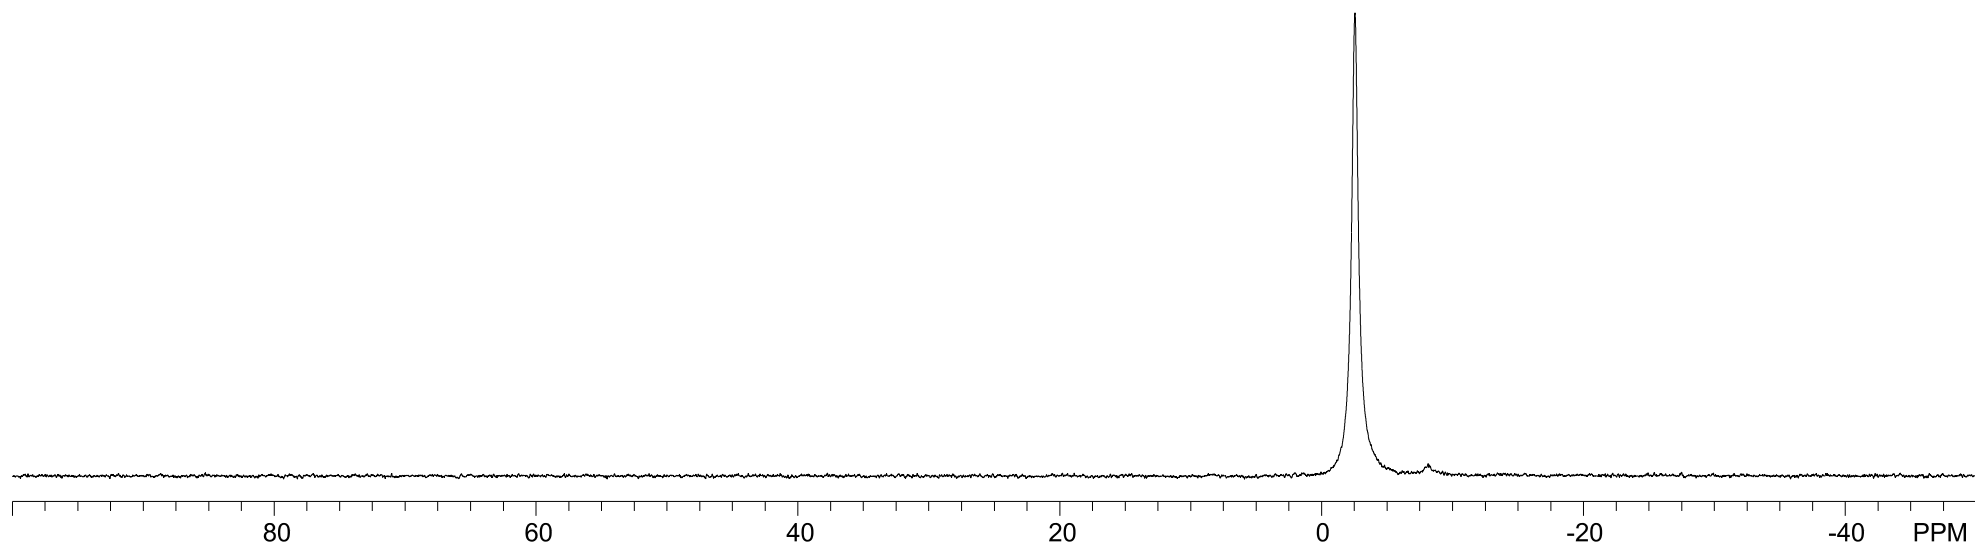

S115

$^{13}\text{C}\{^1\text{H}\}$  NMR (176 MHz),  
 $\text{CDCl}_3$



**55**

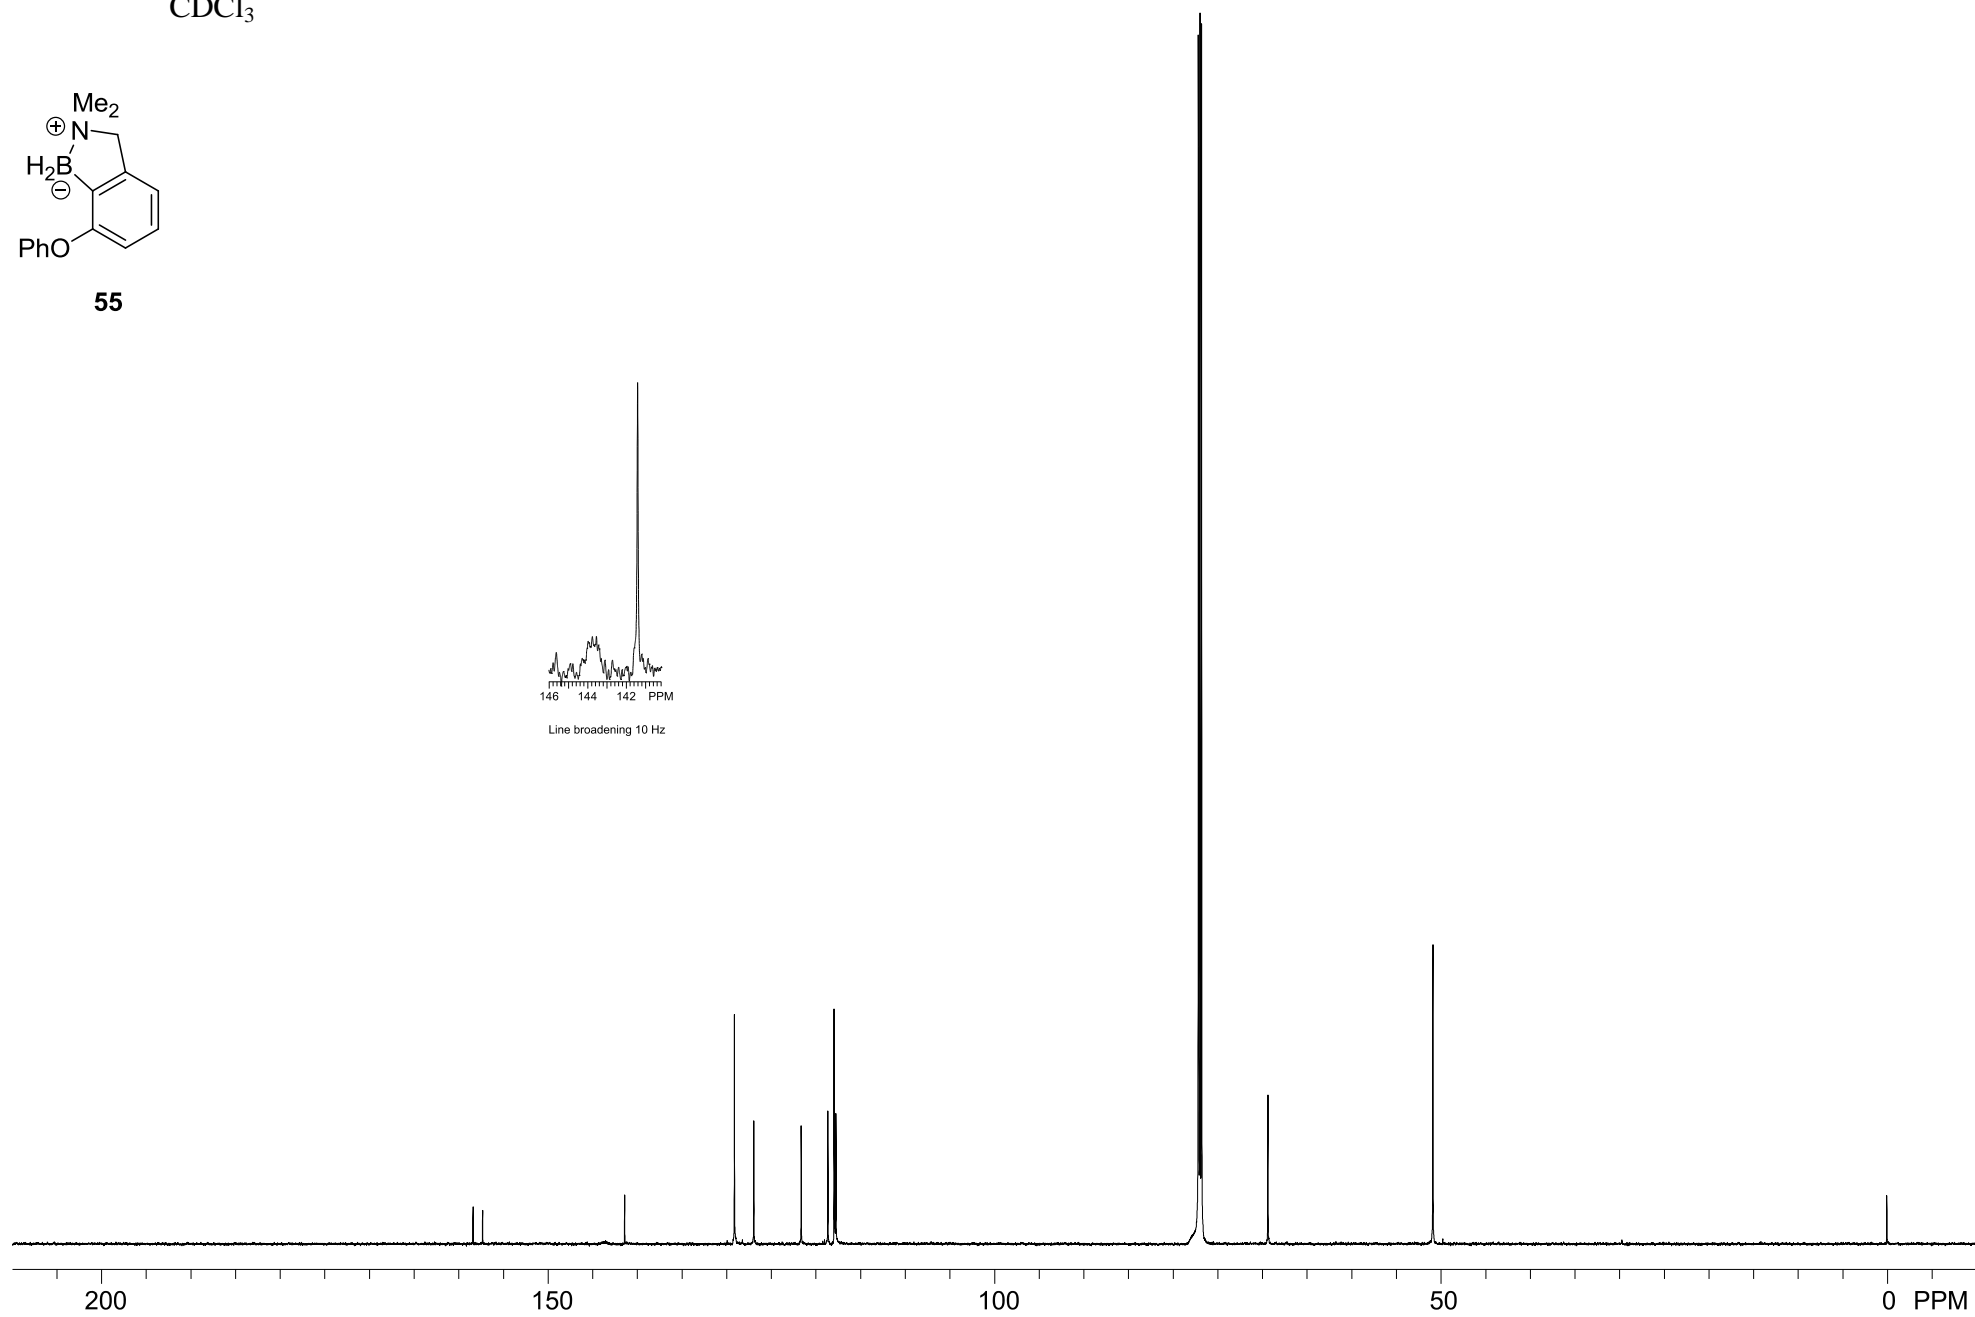

$^1\text{H}$  NMR (500 MHz),  
 $\text{CDCl}_3$

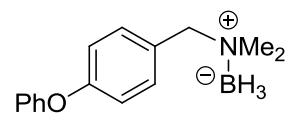

**56**

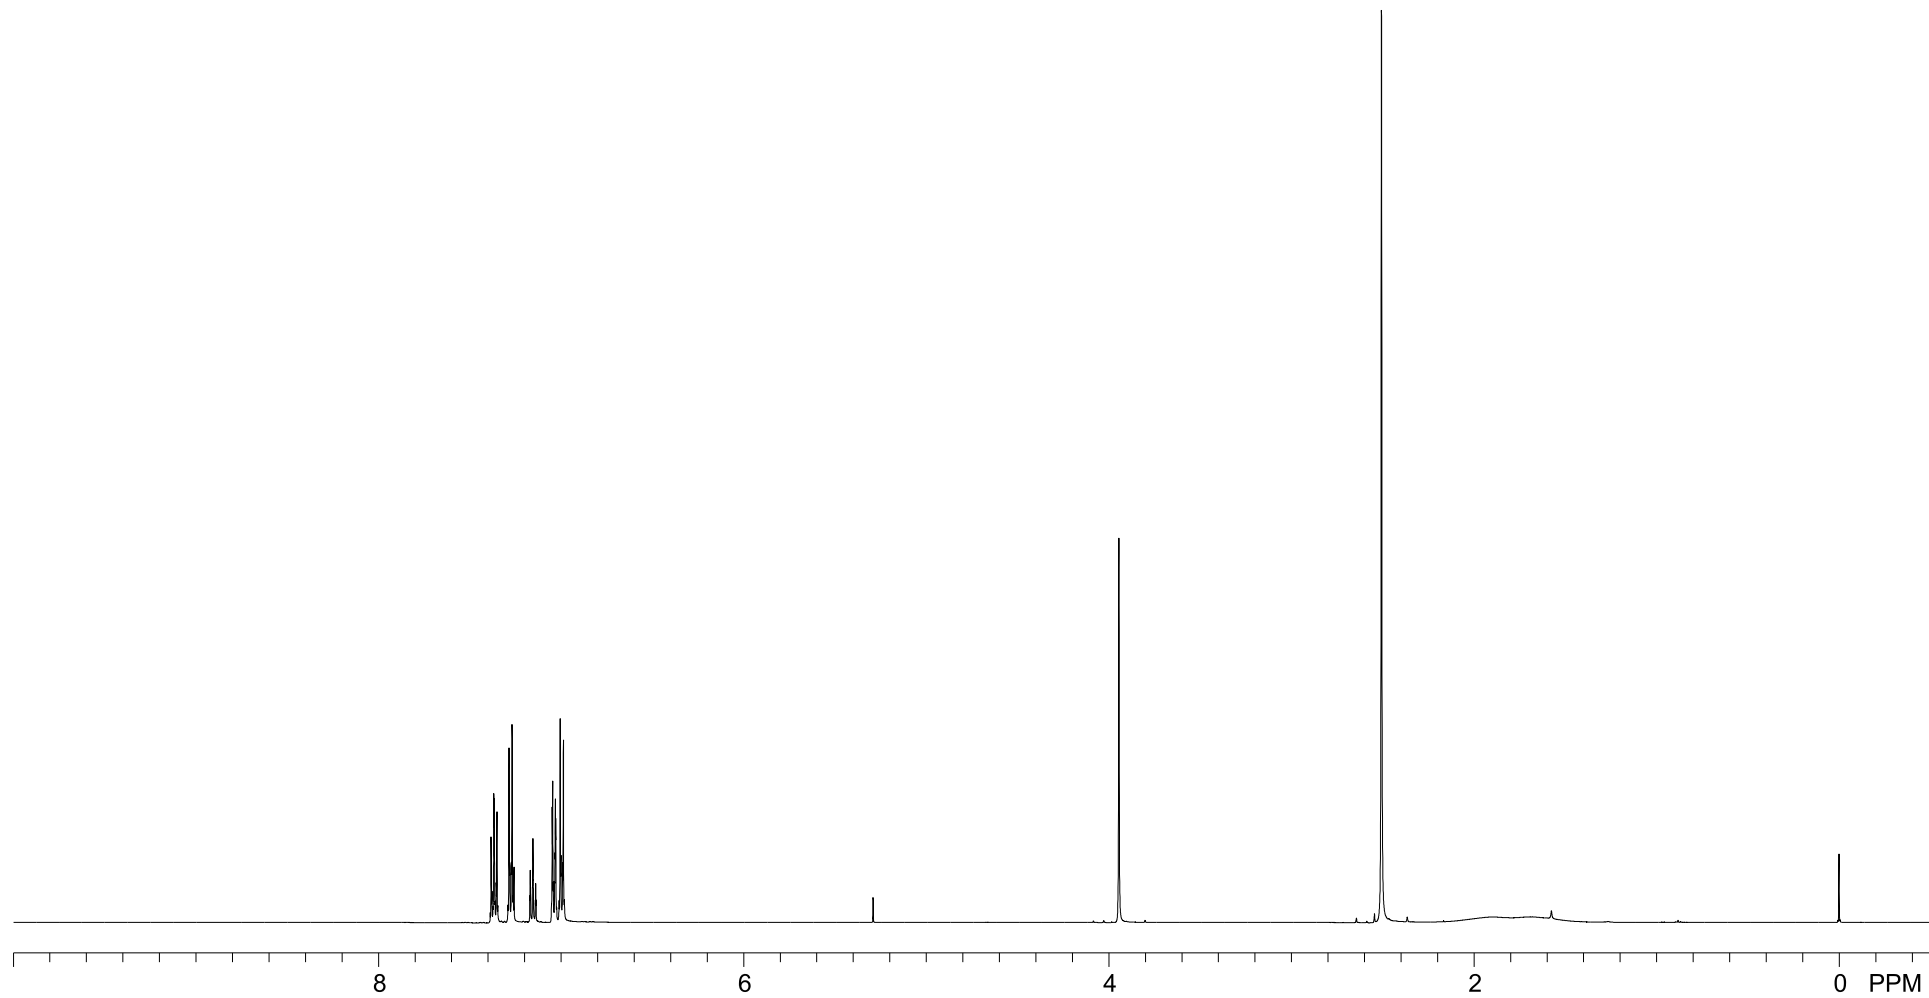

$^{13}\text{C}\{^1\text{H}\}$  NMR (126 MHz),  
 $\text{CDCl}_3$

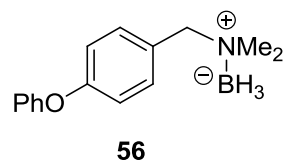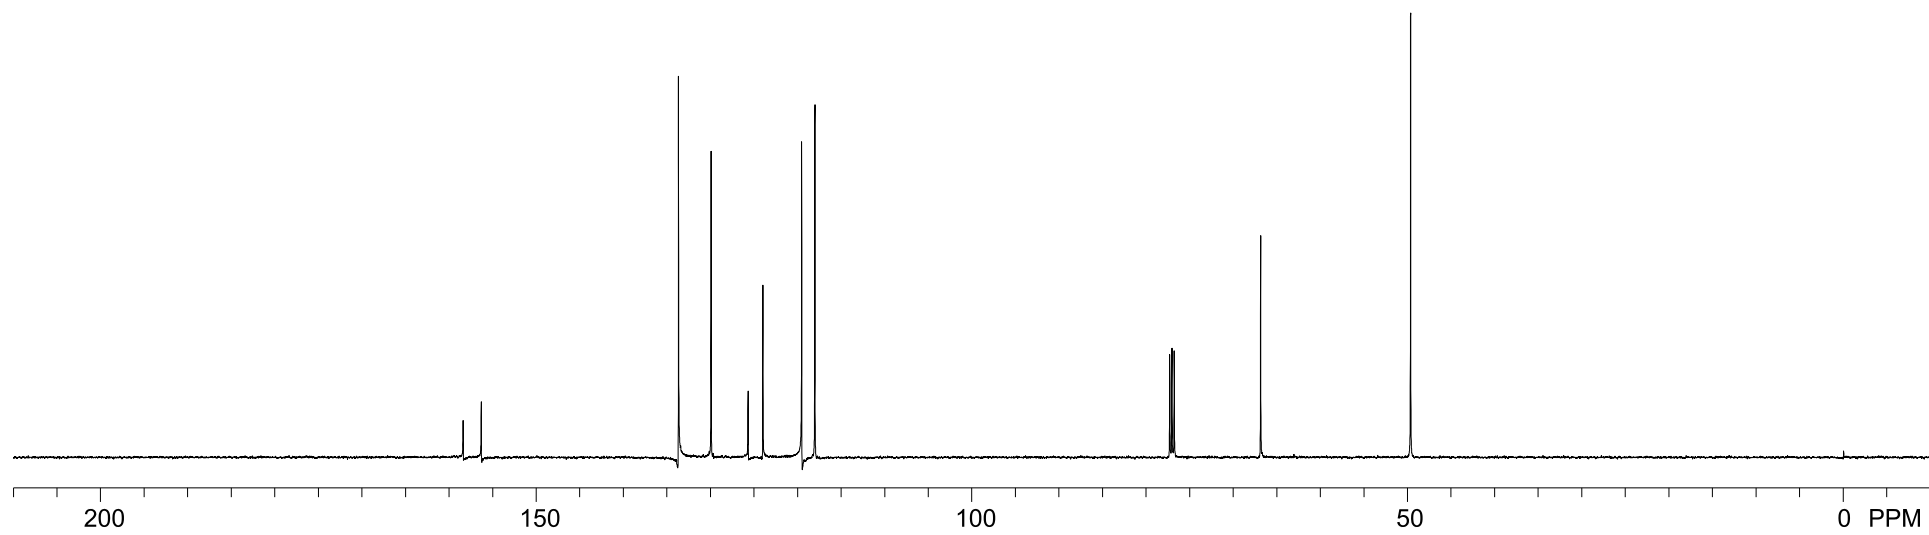

$^1\text{H}$  NMR (500 MHz),  
 $\text{CDCl}_3$

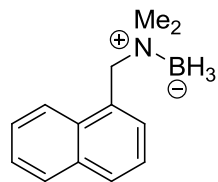

**61**

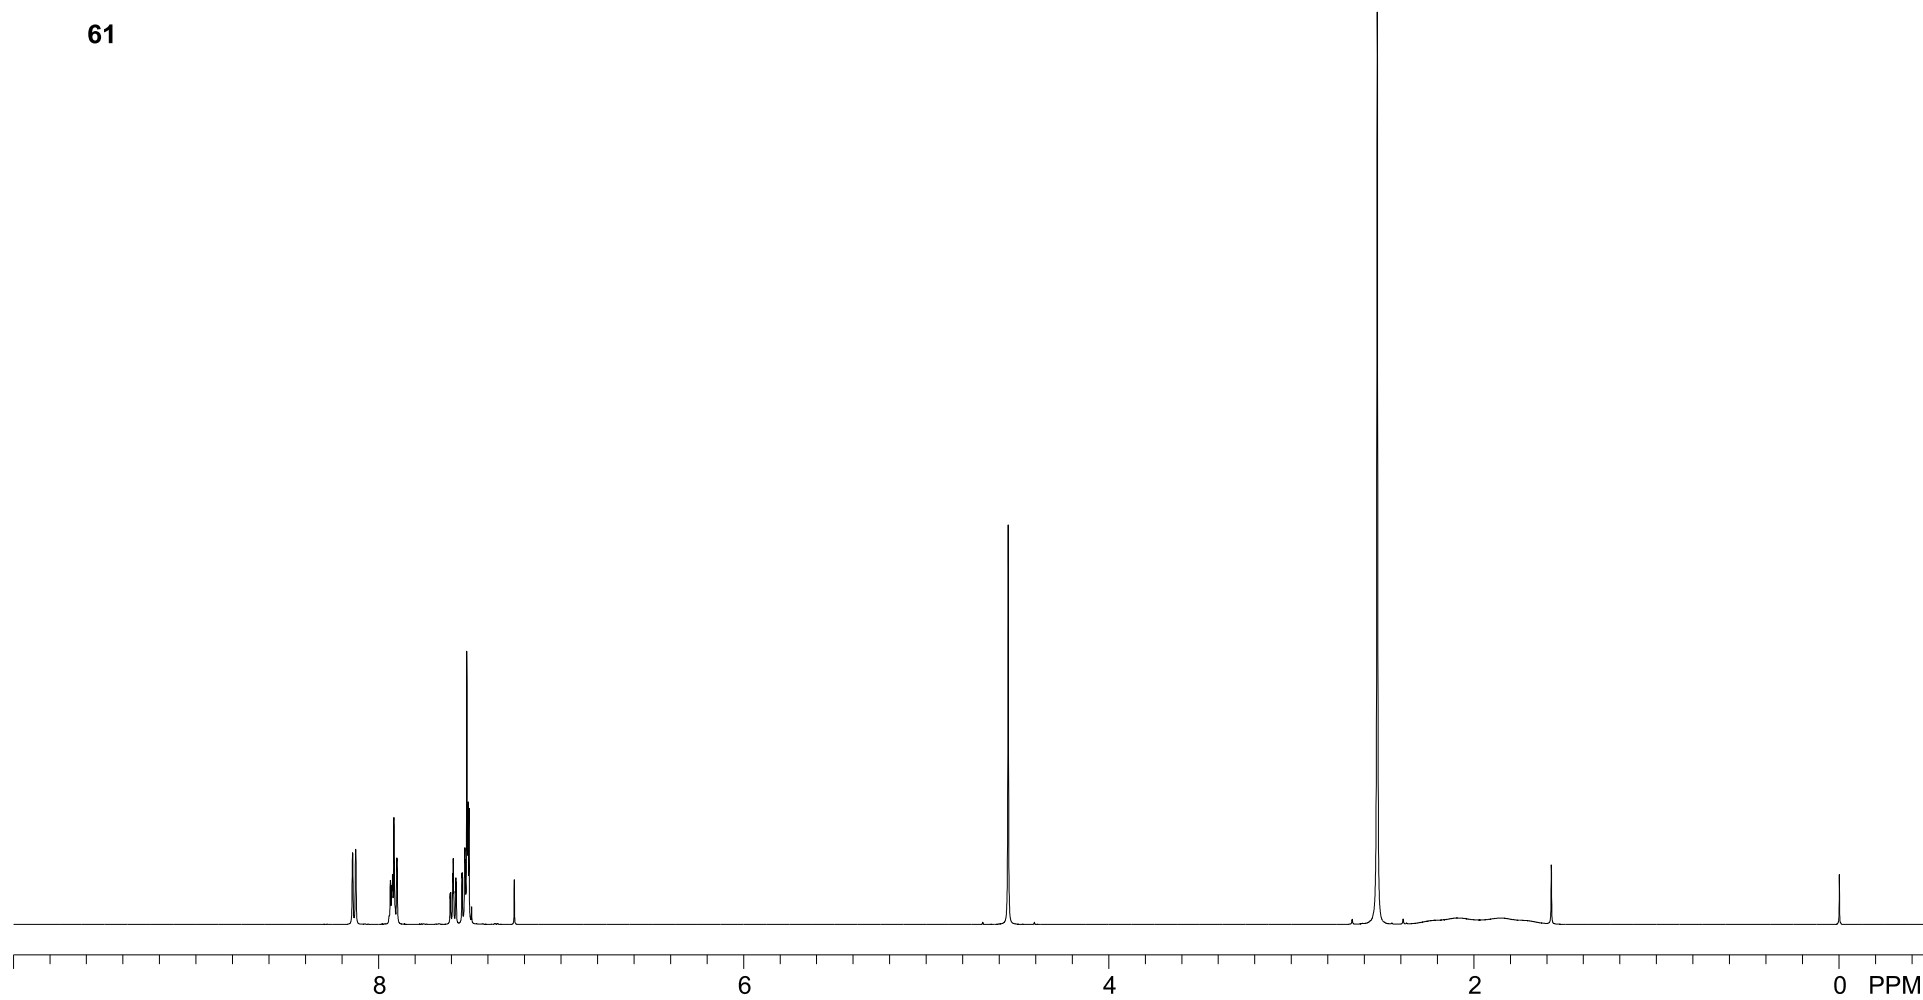

$^{11}\text{B}$  NMR (128 MHz),  
 $\text{CDCl}_3$



**61**

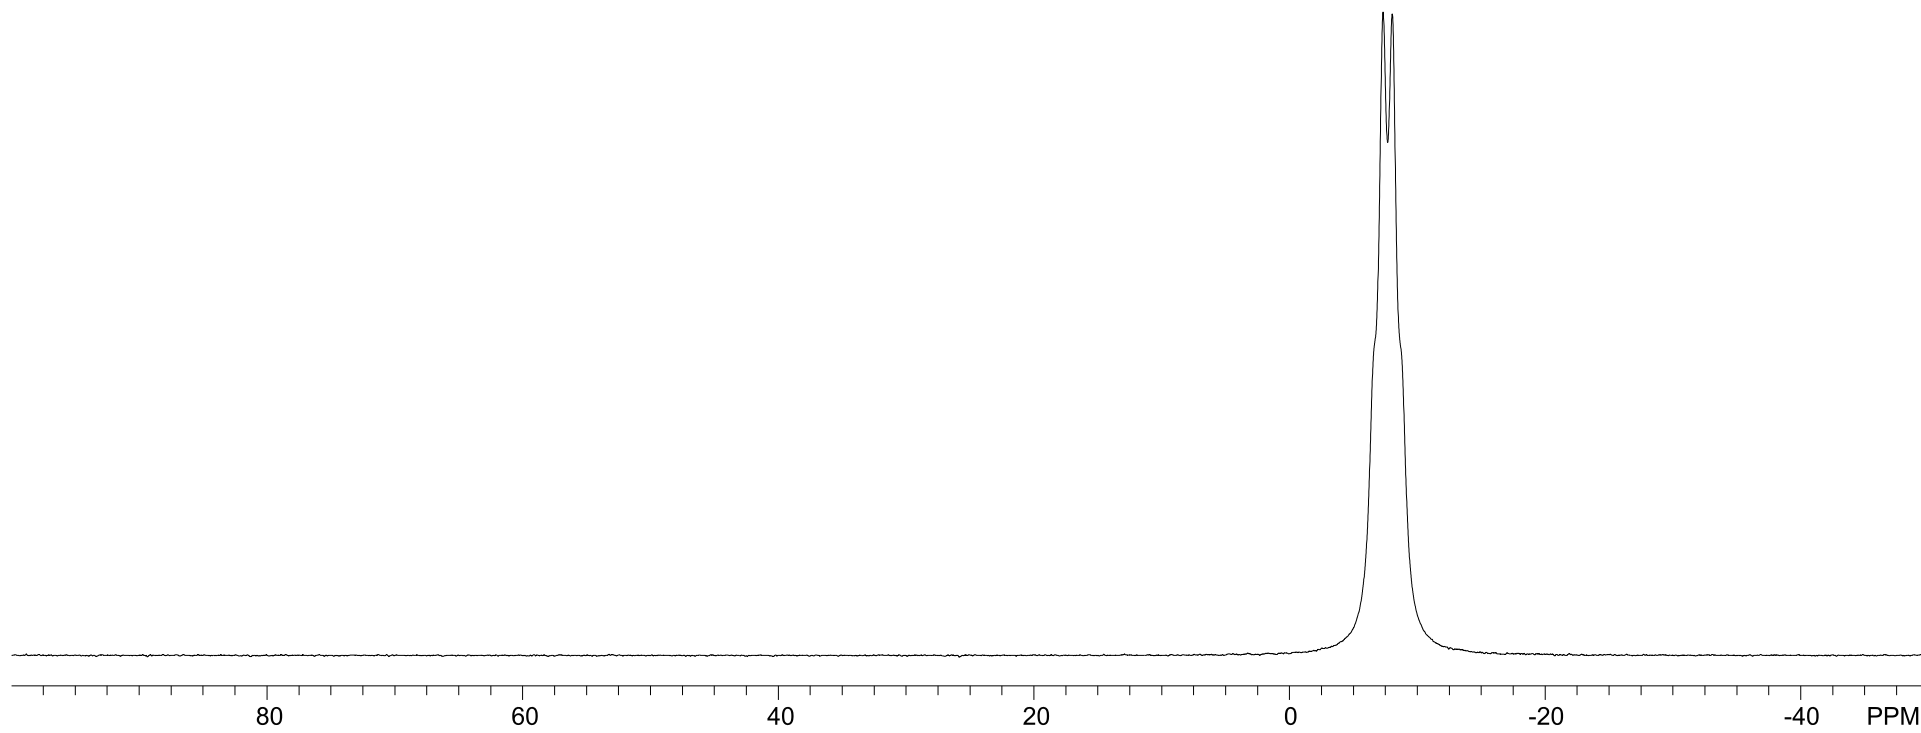



$^{11}\text{B}\{^1\text{H}\}$  NMR (128 MHz),  
 $\text{CDCl}_3$

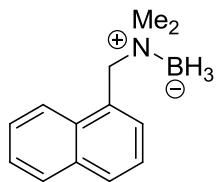

**61**

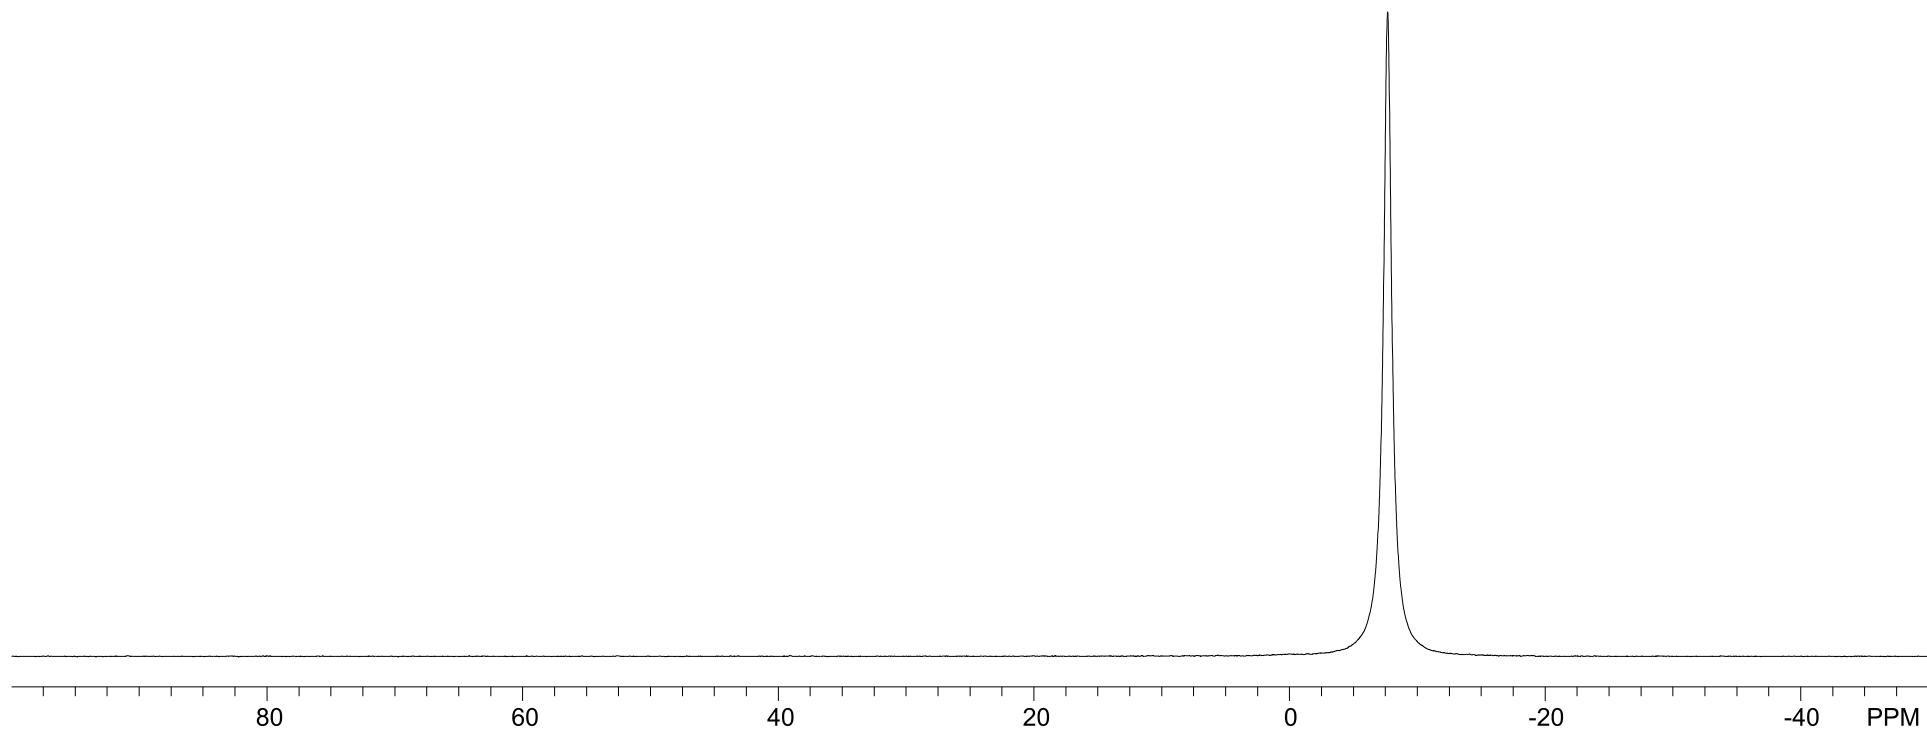

$^1\text{H}$  NMR (500 MHz),  
 $\text{CDCl}_3$

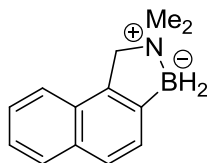

62

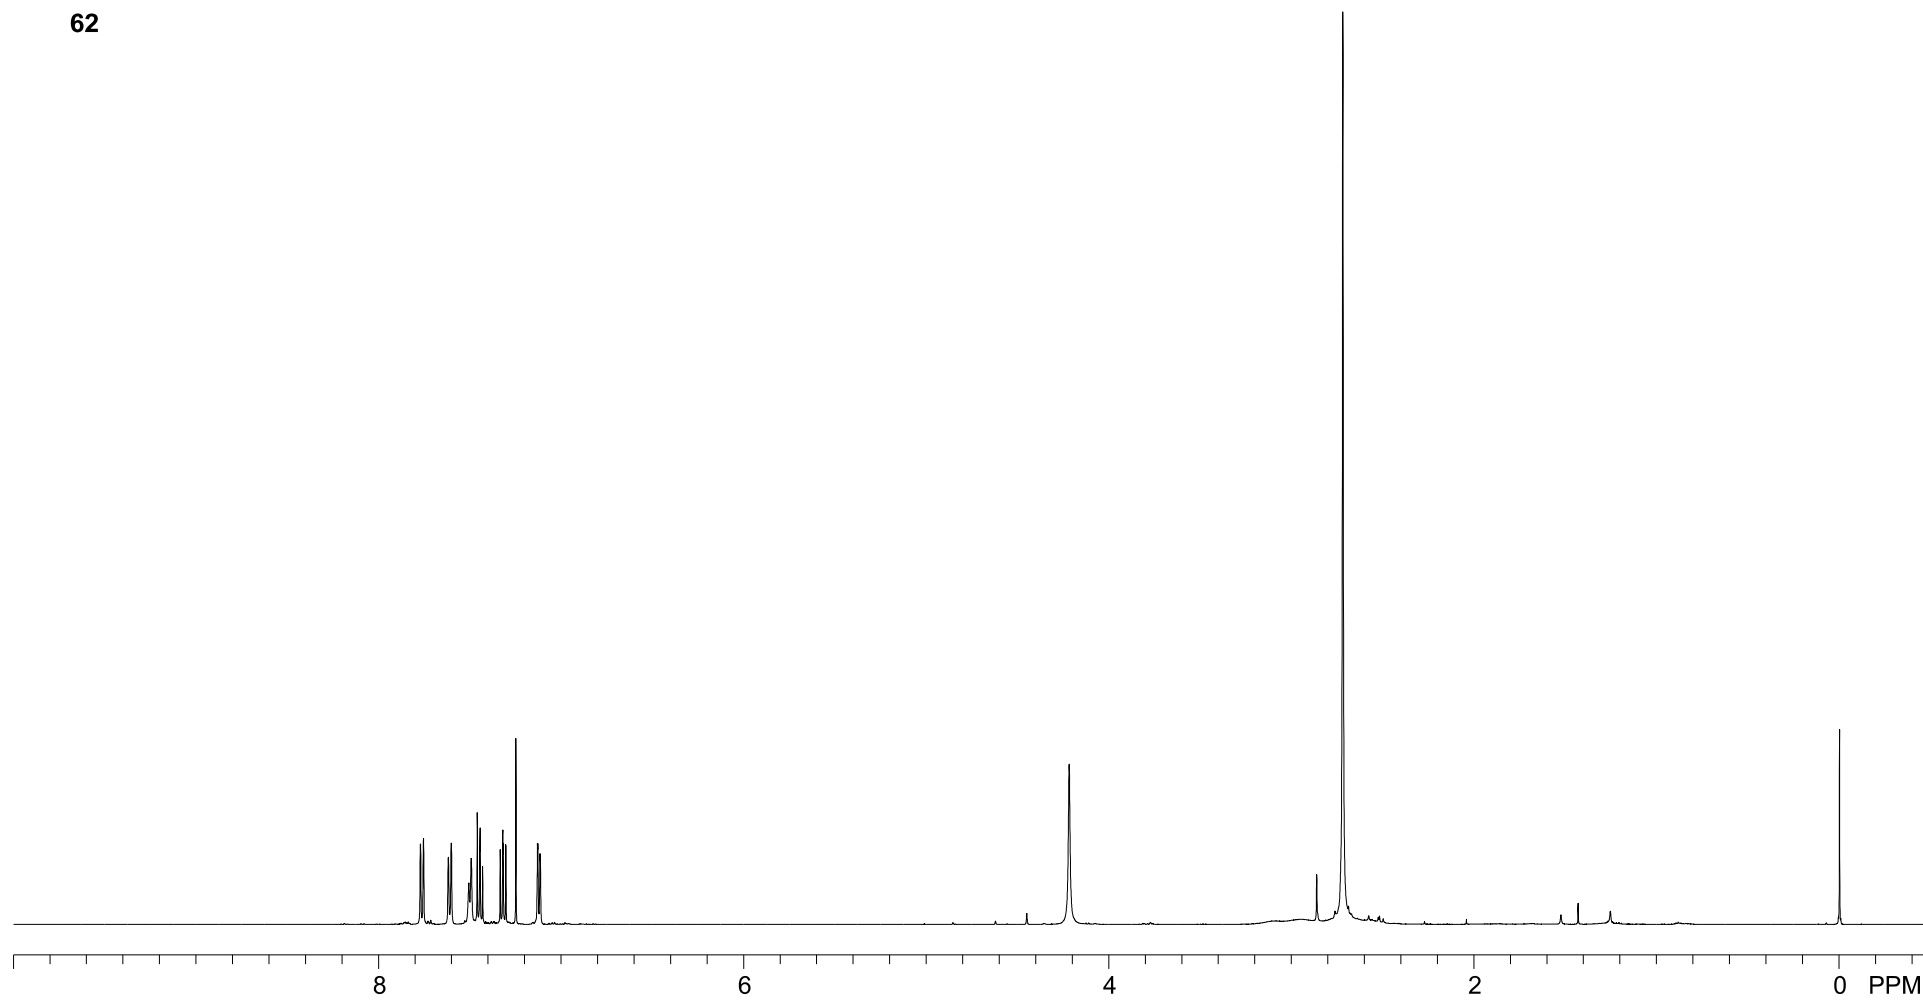

$^1\text{H}$  NMR (500 MHz),  
 $\text{CDCl}_3$

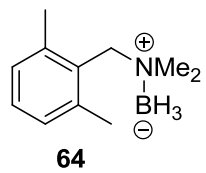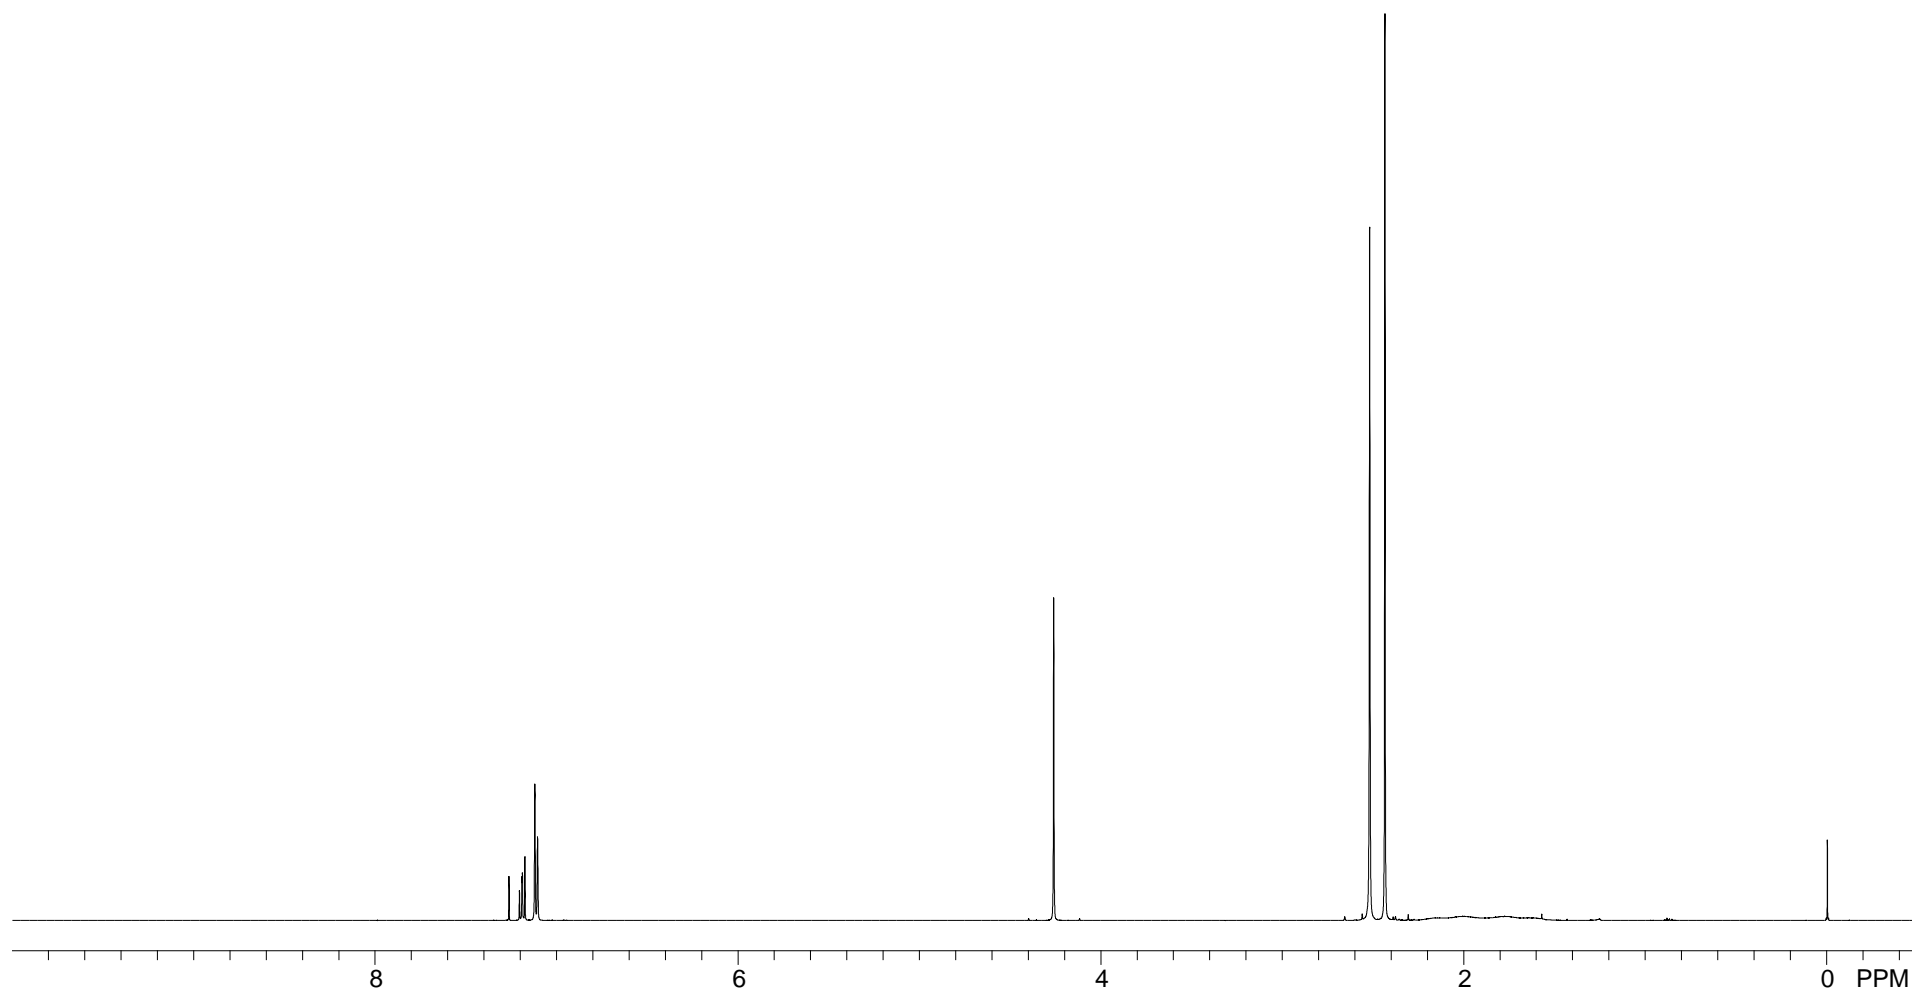

$^{11}\text{B}$  NMR (128 MHz),  
 $\text{CDCl}_3$

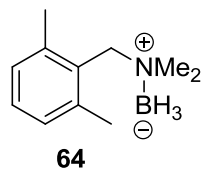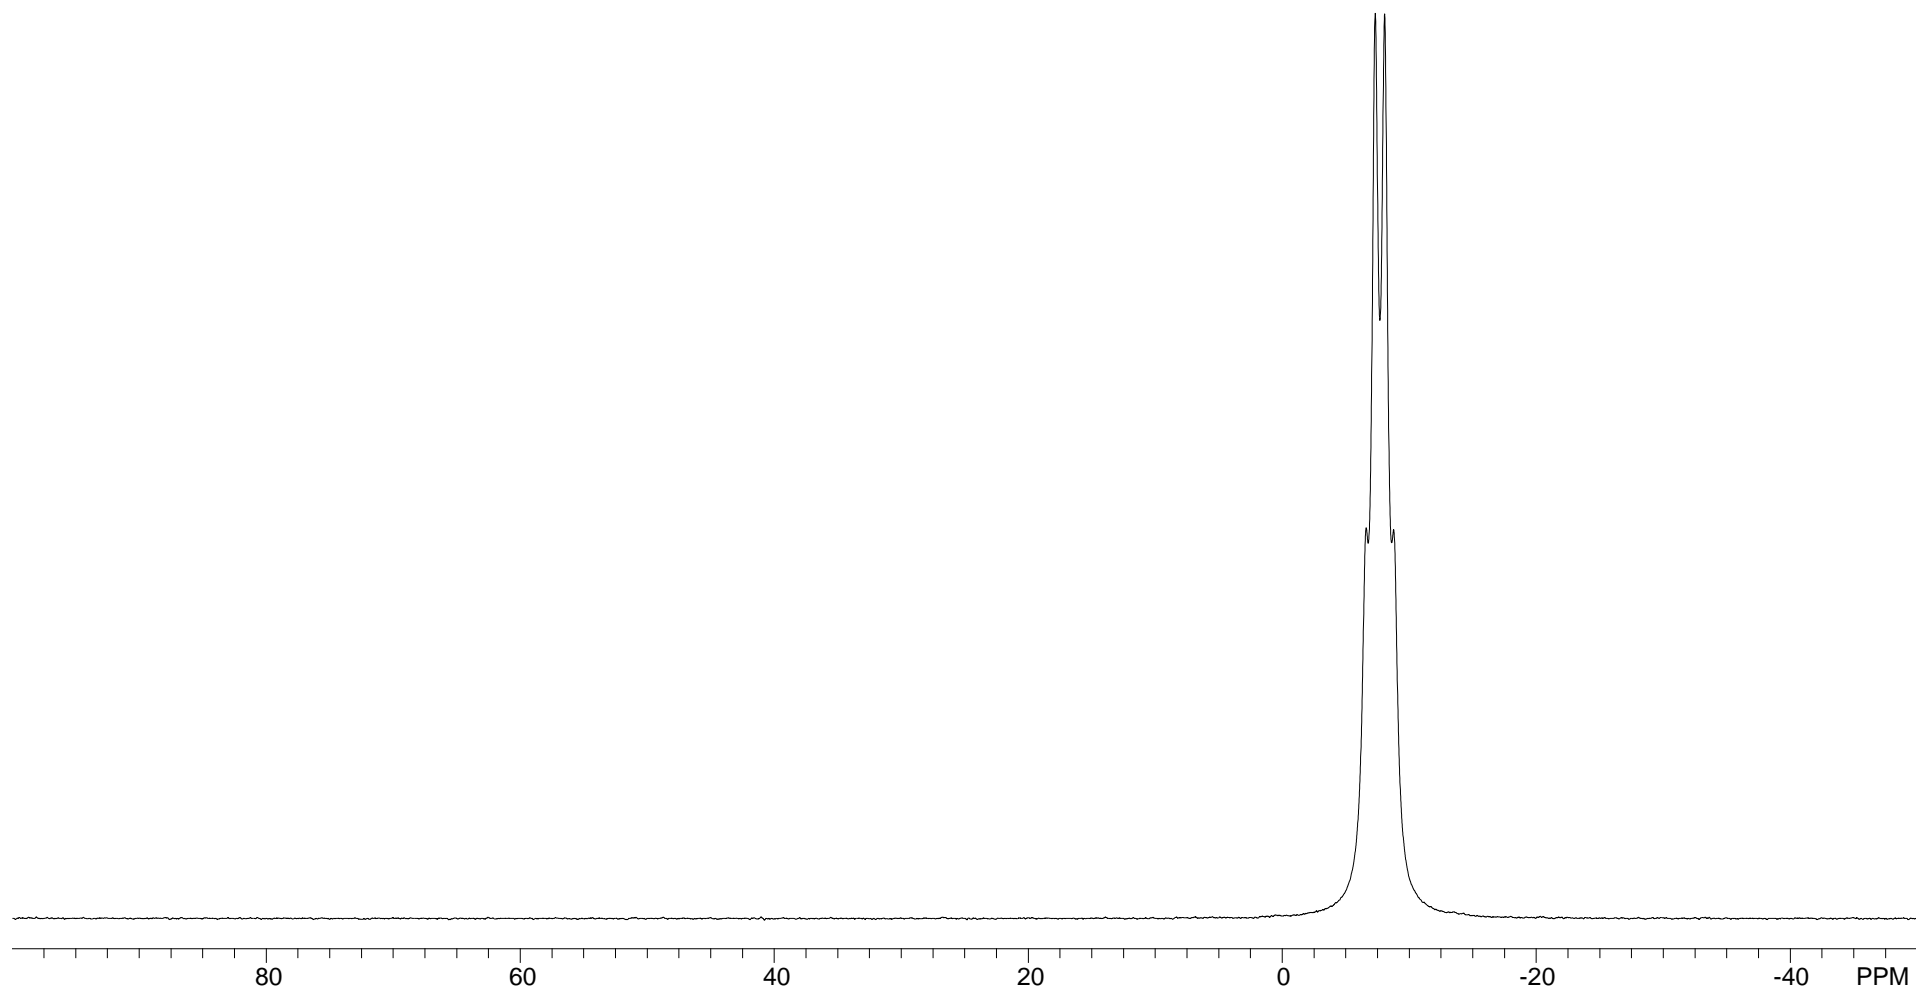

$^{11}\text{B}\{^1\text{H}\}$  NMR (128 MHz),  
 $\text{CDCl}_3$

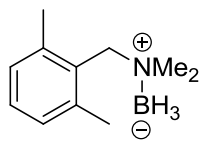

**64**

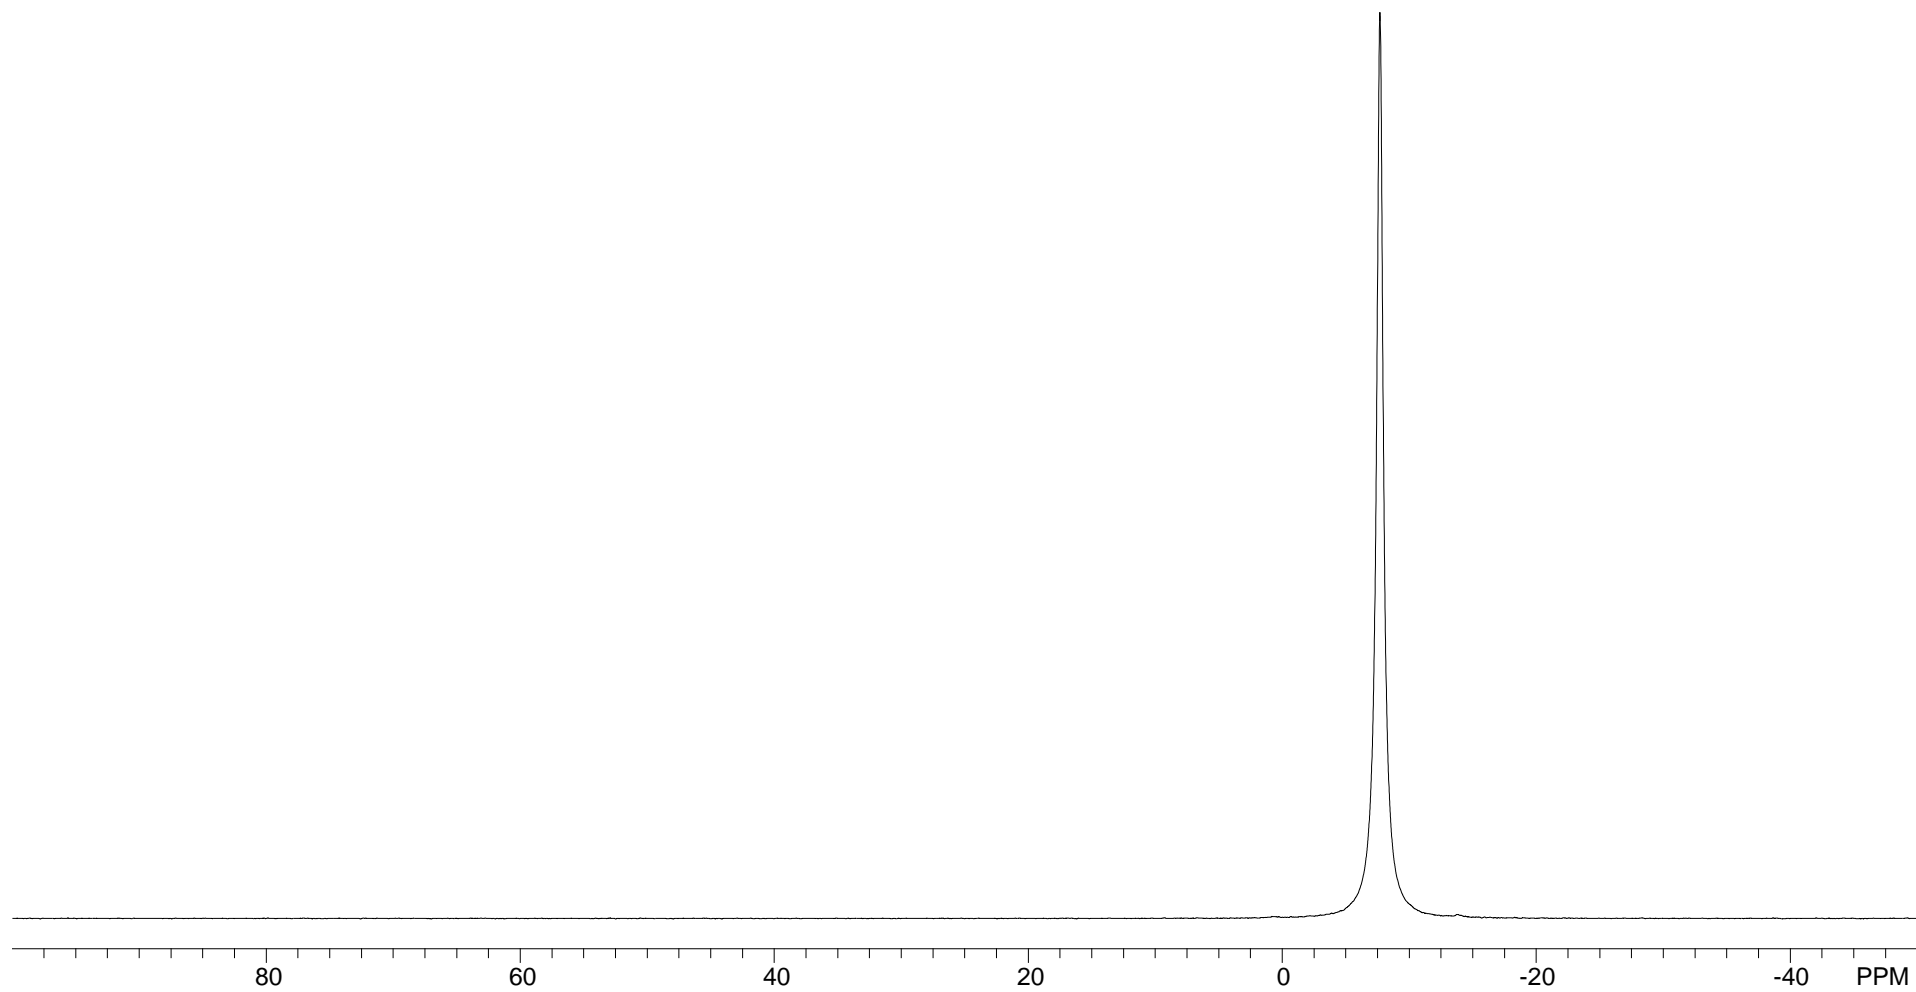

$^{13}\text{C}\{^1\text{H}\}$  NMR (101 MHz),  
 $\text{CDCl}_3$

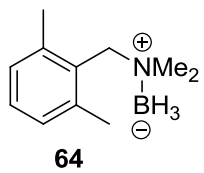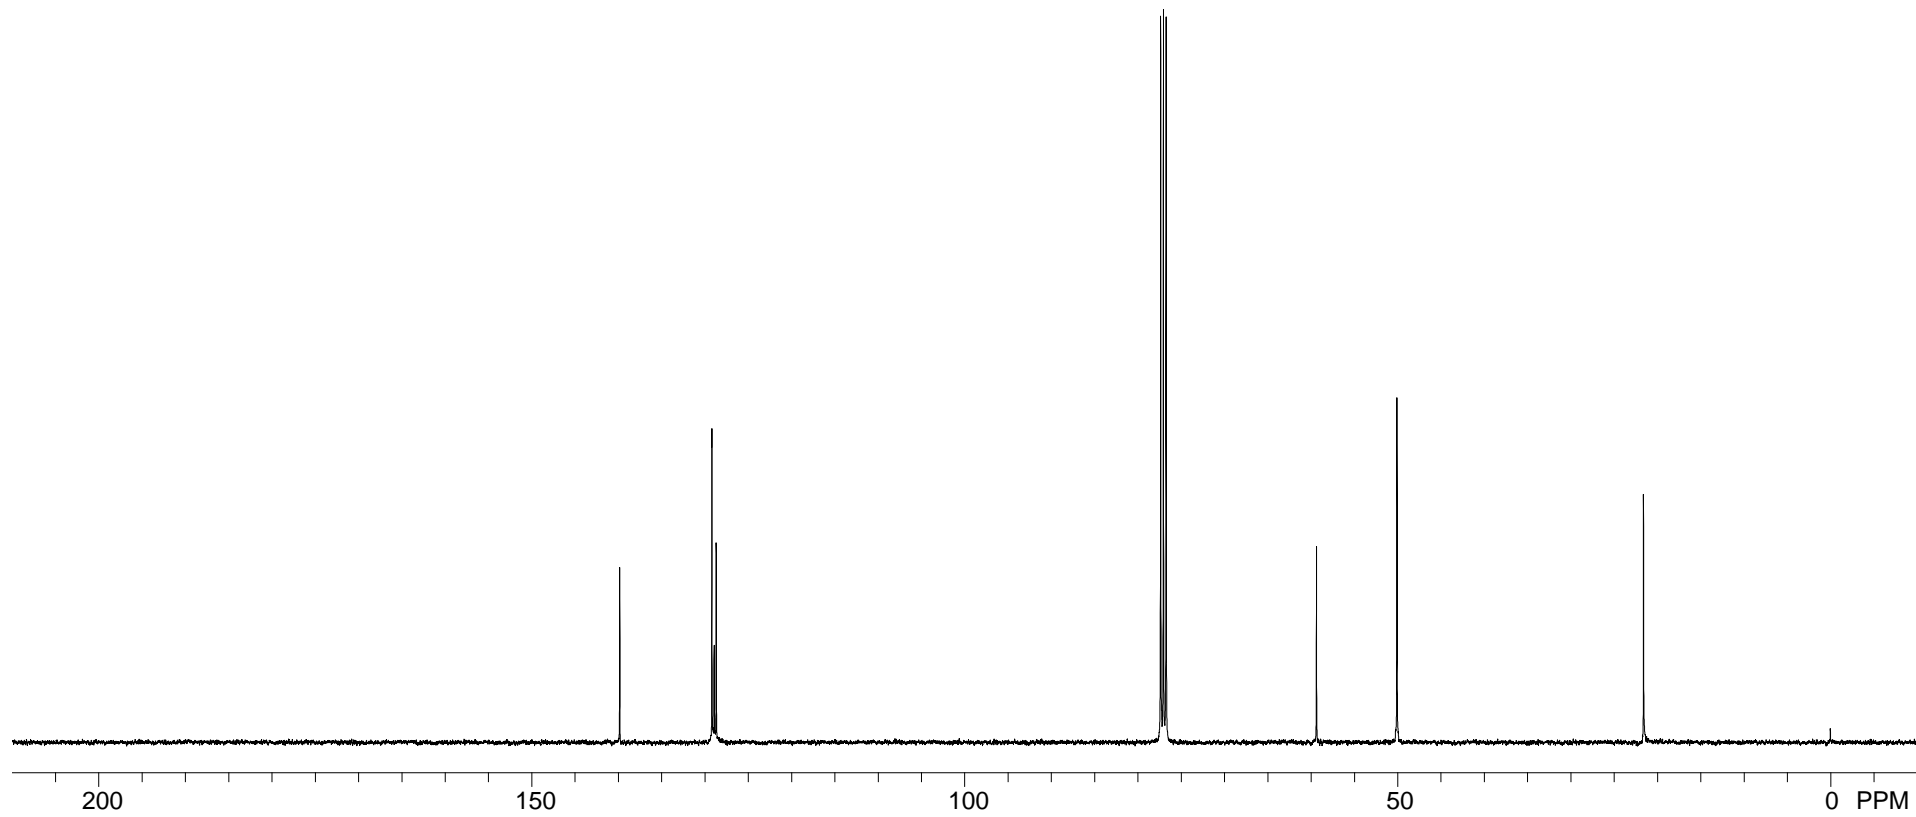

$^1\text{H}$  NMR (500 MHz),  
 $\text{CDCl}_3$

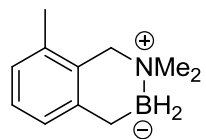

**65**

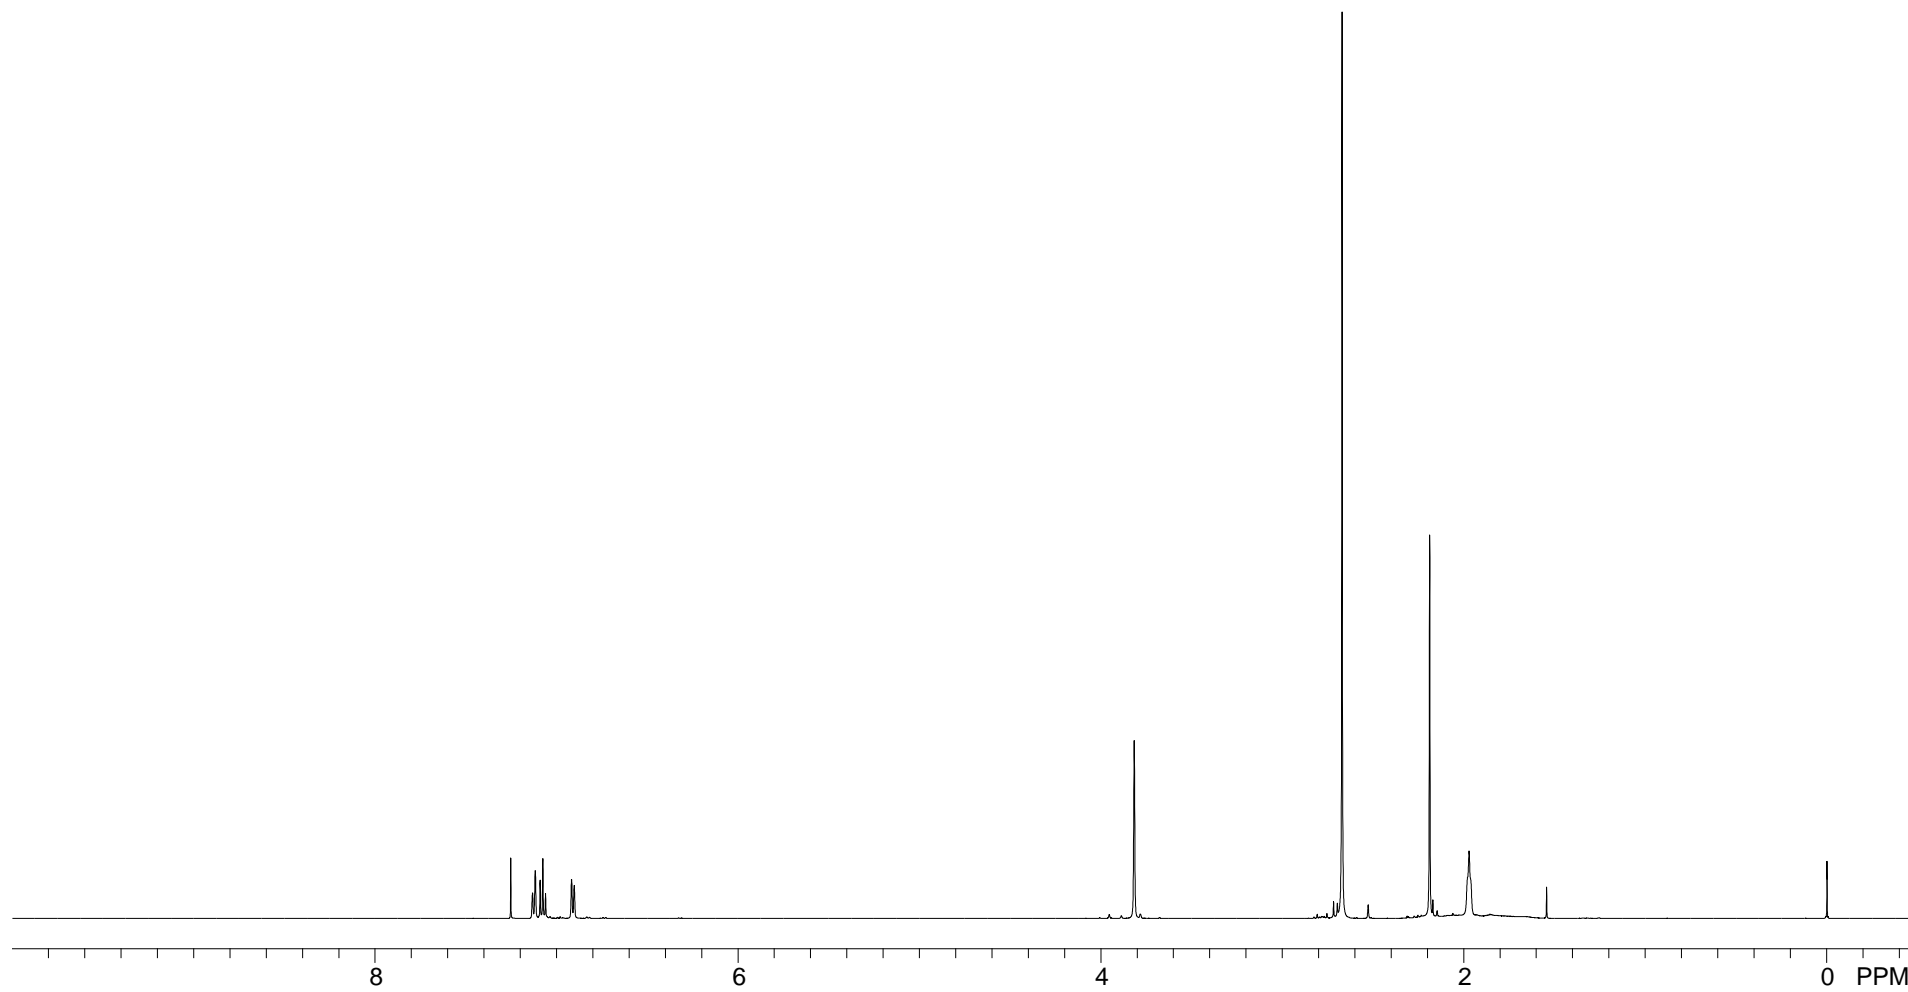

$^{11}\text{B}$  NMR (128 MHz),  
 $\text{CDCl}_3$



**65**

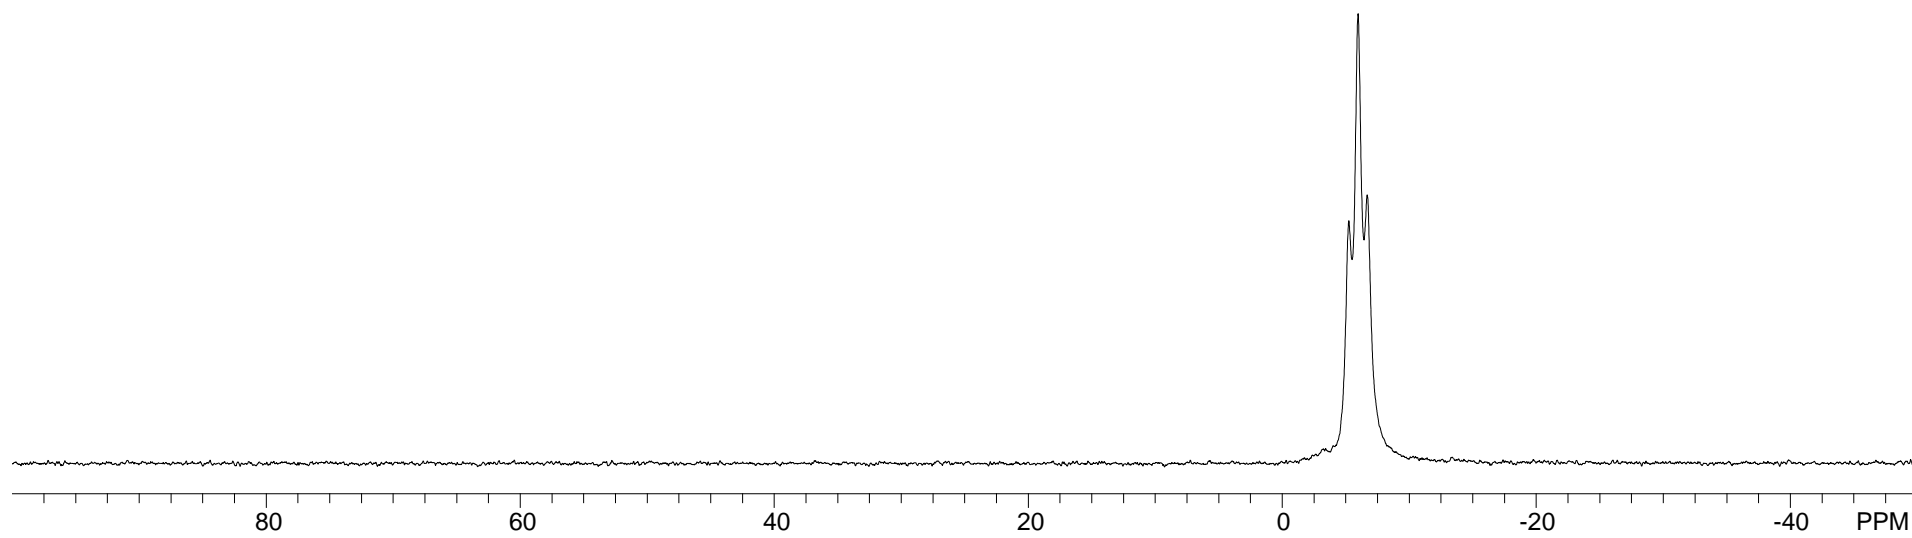



$^{11}\text{B}\{^1\text{H}\}$  NMR (128 MHz),  
 $\text{CDCl}_3$

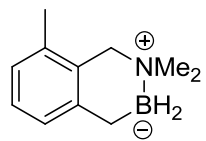

**65**

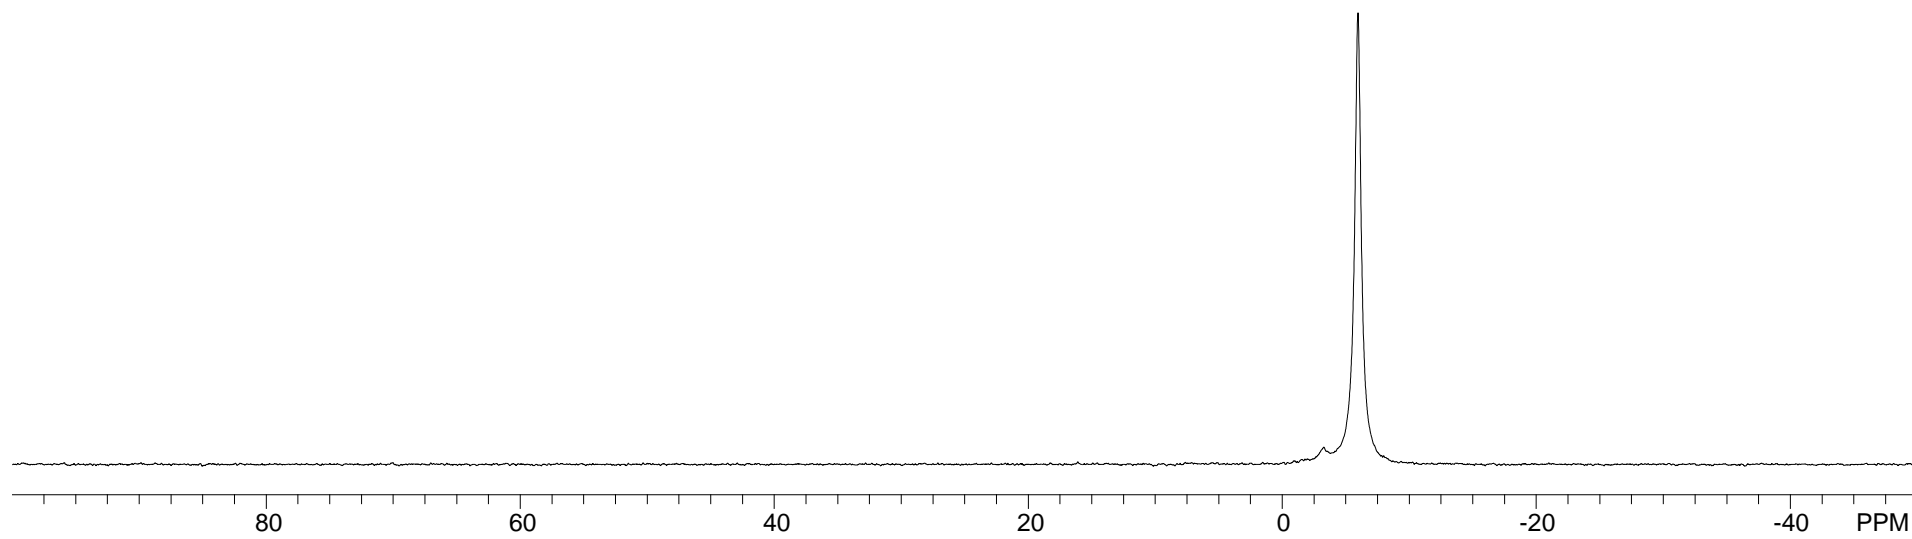

$^{13}\text{C}\{^1\text{H}\}$  NMR (101 MHz),  
 $\text{CDCl}_3$

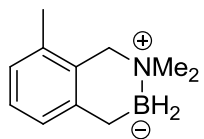

**65**

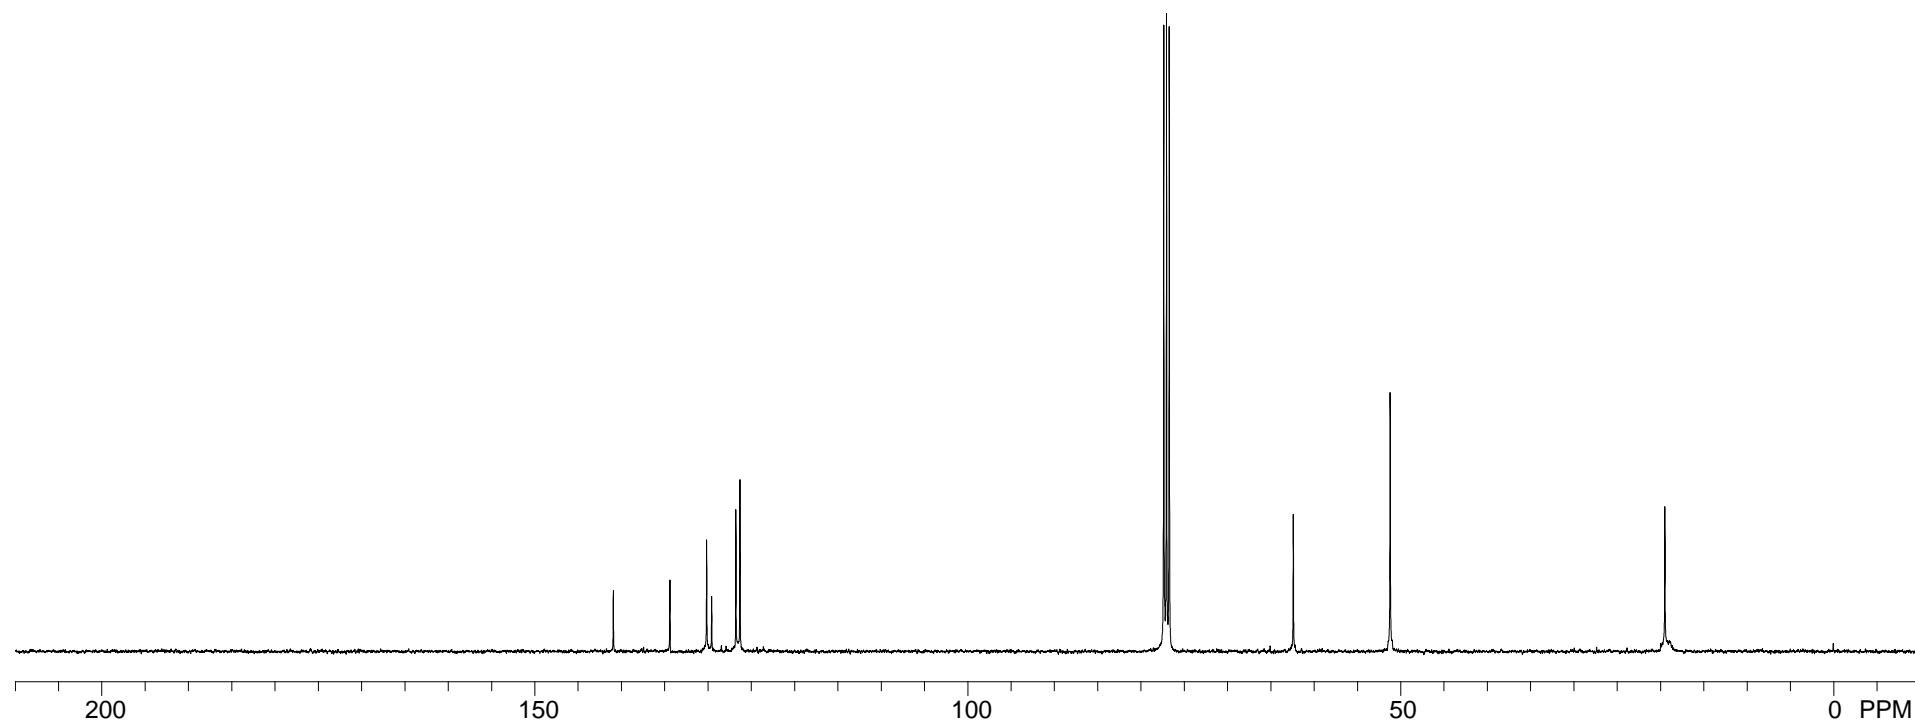

$^1\text{H}$  NMR (500 MHz),  
 $\text{CDCl}_3$

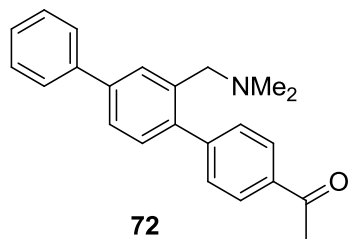

72

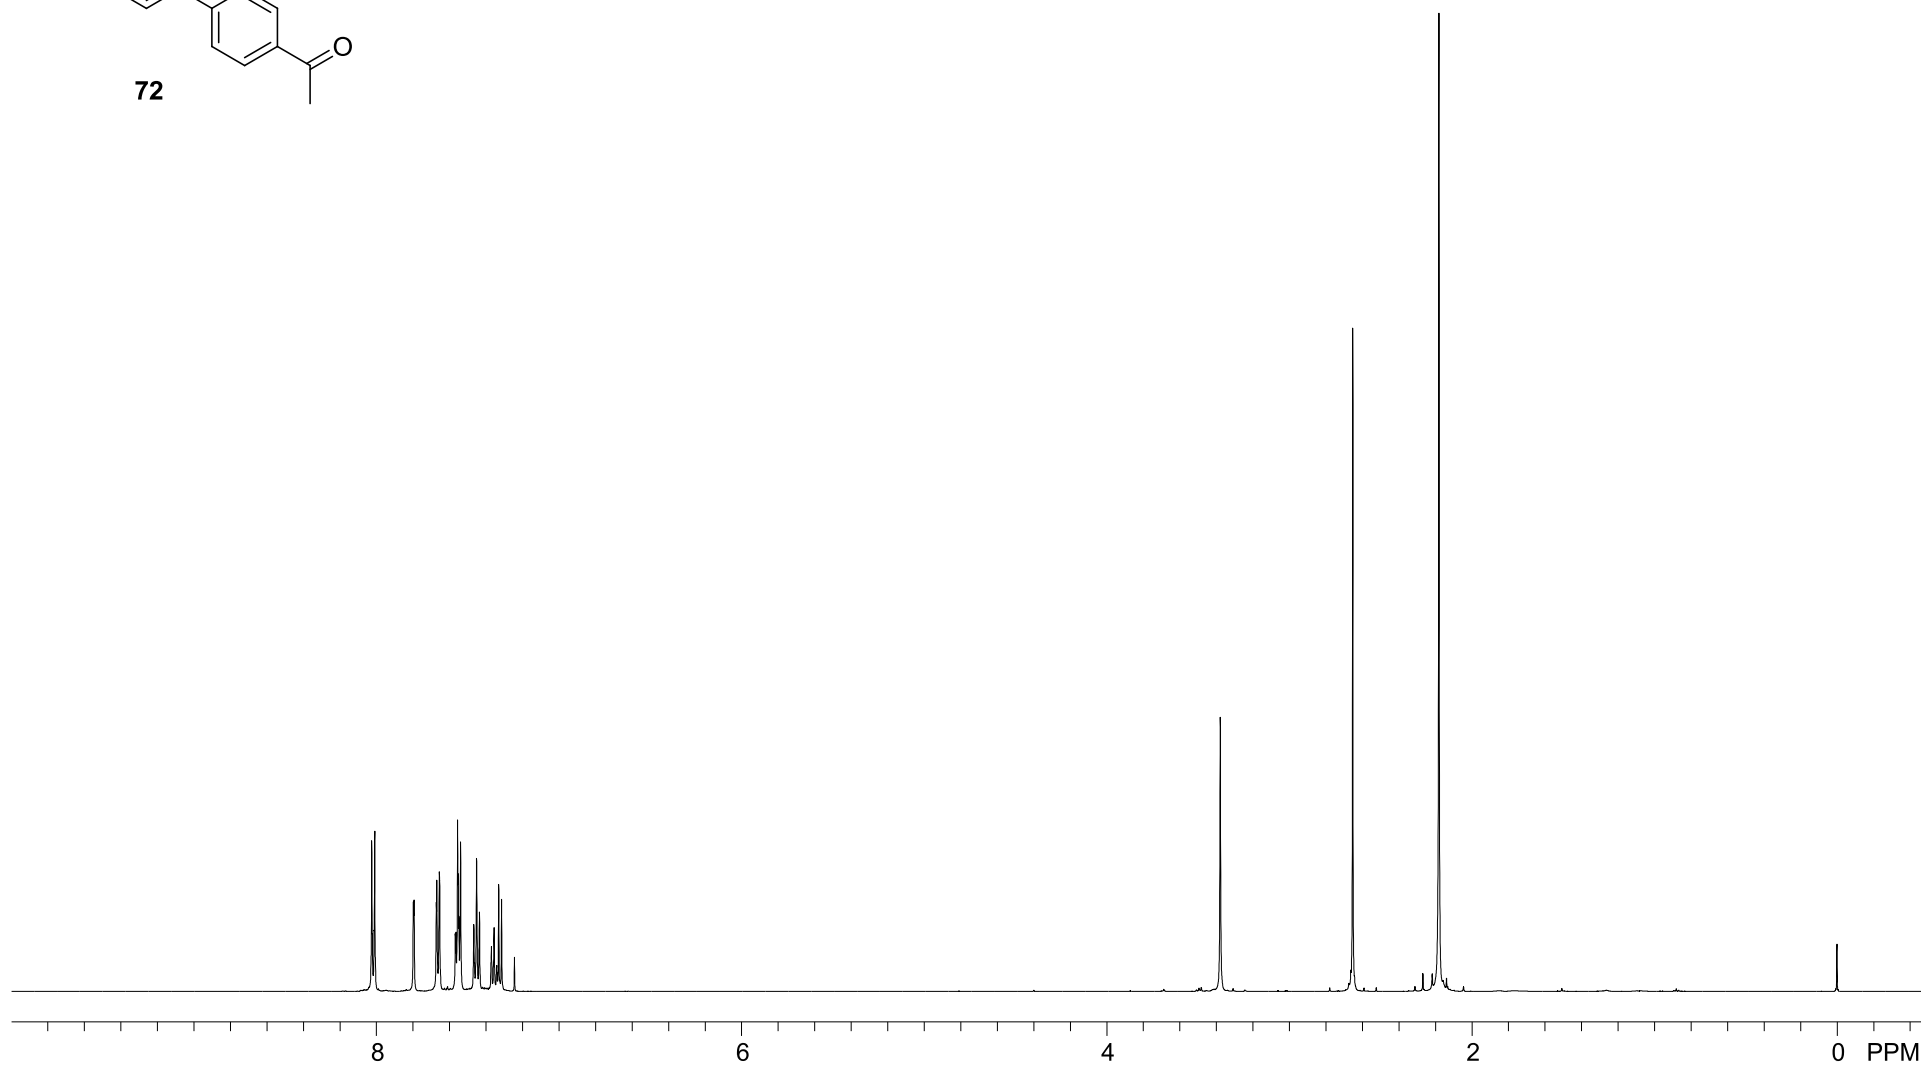

$^{13}\text{C}\{^1\text{H}\}$  NMR (126 MHz),  
 $\text{CDCl}_3$

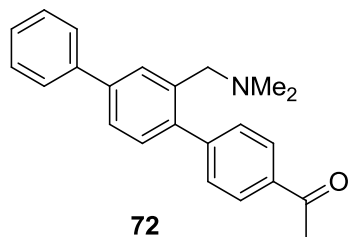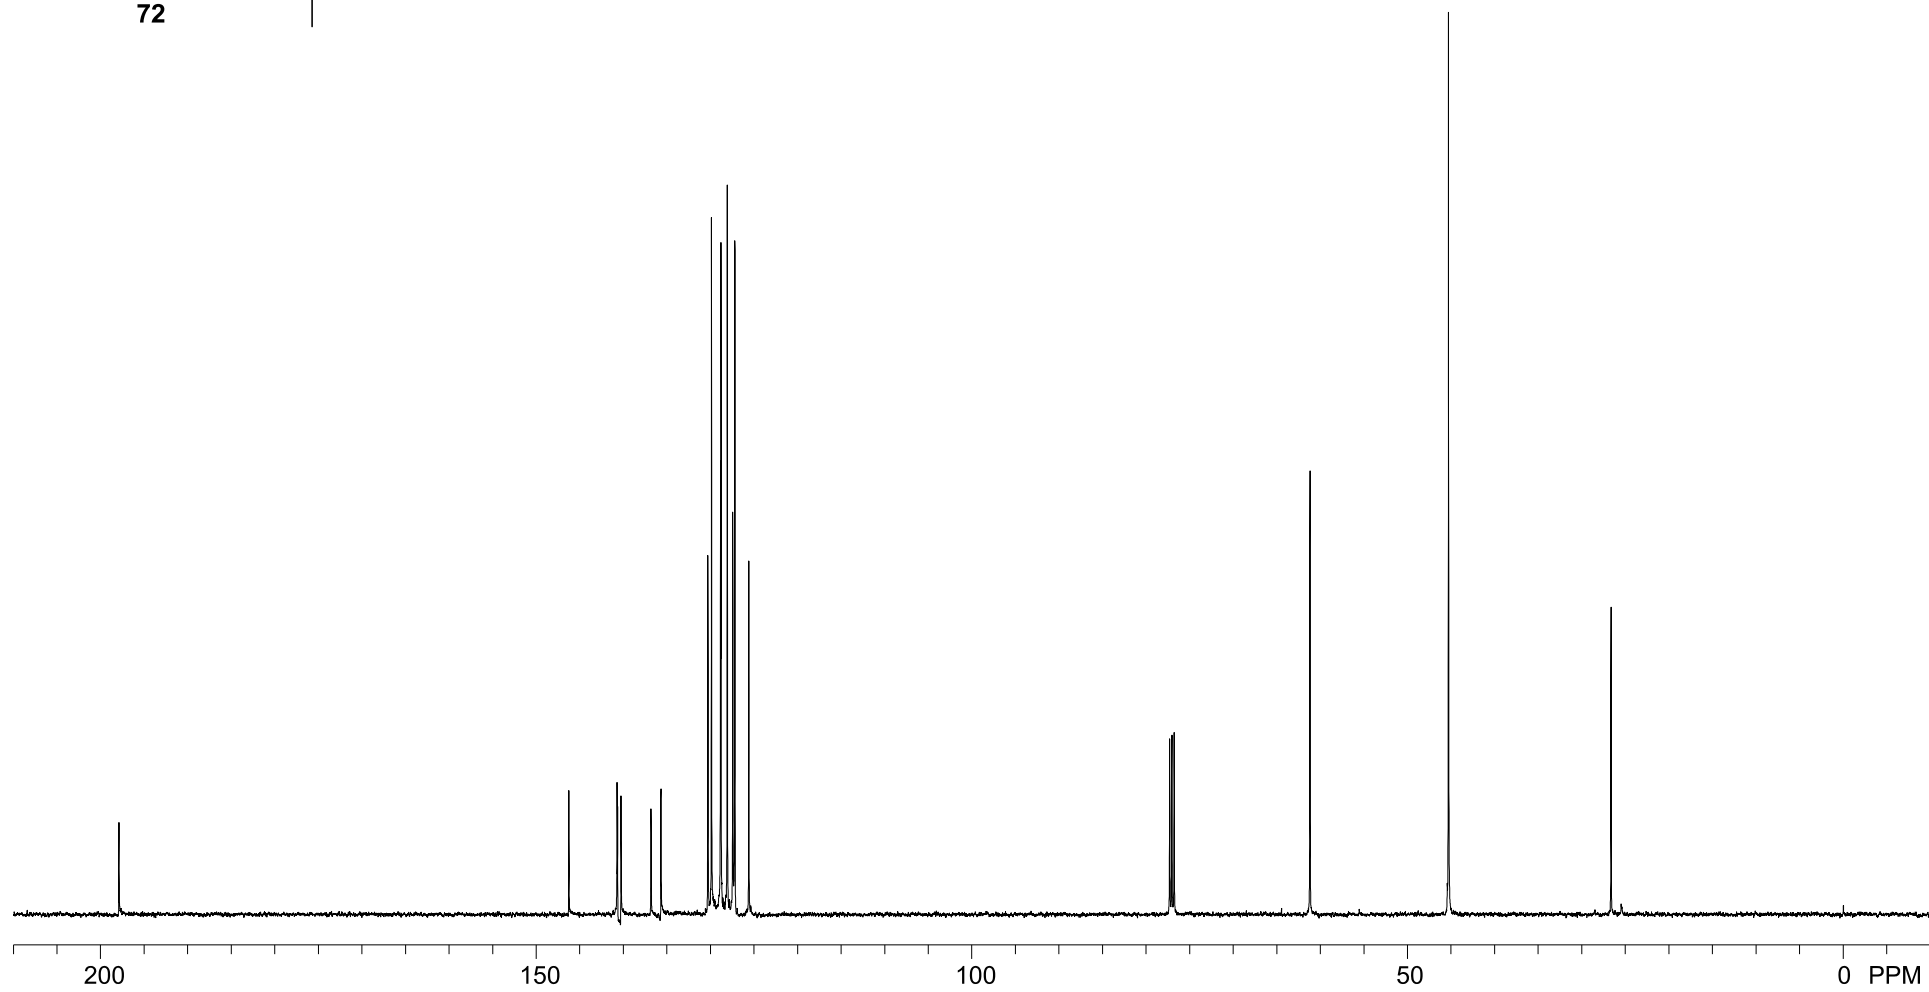

Supplement: NIHMS530759-supplement-1_si_002.pdf [file NIHMS530759-supplement-1_si_002.pdf]
